# Supplementary material for: Exploring perspectives on artificial intelligence: awareness, attitudes, and knowledge among health majors students at Saudi universities
Source: PeerJ journal article supplement (doi:10.7717/peerj-cs.3255), 2025-10-07

# Awareness, Attitudes and Knowledge towards Artificial Intelligence among Students of Health Majors in Saudi Universities

## الوعي والسلوكيات والمعرفة تجاه الذكاء الاصطناعي لدى طلاب التخصصات الصحية في الجامعات السعودية

This research is conducted by Batterjee Medical College. It is studying the awareness, attitude, and knowledge among students of health majors towards Artificial Intelligence (AI) in Saudi universities. This research has been ethically reviewed and approved by the Research Unit at Batterjee Medical College (proposal number: RES-2023-0055). Participation in this survey is not mandatory. Your information will remain confidential and will not be viewed by any third party. This survey does not contain any risks, and you can withdraw from it at any stage. By participating, you consent for your data to be analyzed. If you have any question regarding the questionnaire or the study as a whole, kindly contact the author at mai.albaik@bmc.edu.sa

تم إجراء هذا البحث من قبل كلية البترجي الطبية. يدرس البحث "الوعي والسلوكيات والمعرفة تجاه الذكاء الاصطناعي لدى طلاب التخصصات الطبية بين الجامعات السعودية". تمت مراجعة هذه الدراسة أخلاقياً من قبل وحدة الأبحاث في كلية البترجي الطبية (المقترح البحثي رقم: RES-2023-0055).

المشاركة في هذا الاستطلاع ليست إلزامية. ستبقى معلوماتك سرية ولن يطلع عليها أي طرف ثالث. لا يحتوي هذا الاستطلاع على أي مخاطر، ويمكنك الانسحاب منه في أي مرحلة. إذا كان لديك أي أسئلة أو استفسارات بخصوص الاستبيان أو البحث فبإمكانكم التواصل معنا على البريد الإلكتروني mai.albaik@bmc.edu.sa

من خلال المشاركة، فإنك توافق على تحليل بياناتك.

\* Indicates required question

### 1. Do you consent to participating in this research? \*

هل توافق على المشاركة في هذا البحث؟

Mark only one oval.

☐ Agree أوافق

### Personal Information المعلومات الشخصية

### 2. Gender الجنس \*

Mark only one oval.

☐ Male ذكر

☐ Female أنثى

### 3. Age العمر \*

Please write your age: رجااء اكتب عمرك

---

4. **Nationality** \* الجنسية

Mark only one oval.

- ☐ Saudi سعودي
- ☐ Non-Saudi غير سعودي

5. **University** \* الجامعة

Mark only one oval.

- ☐ Batterjee Medical College, Jeddah. كلية البترجي الطبية، جدة.
- ☐ King Abdulaziz University, Jeddah. جامعة الملك عبد العزيز، جدة.
- ☐ Fakeeh College of Medical Sciences, Jeddah. كلية فقيه للعلوم الطبية، جدة.
- ☐ Ibn Sina National College For Medical Studies, Jeddah. كلية ابن سينا الاهلية للعلوم الطبية، جدة.
- ☐ Jeddah Unoversity, Jeddah. جامعة جدة، جدة.
- ☐ Umm Al Qura University, Makkah. جامعة أم القرى، مكة.
- ☐ King Saud University, Riyadh. جامعة الملك سعود، الرياض.
- ☐ King Faisal University, Riyadh. جامعة الملك فيصل، الرياض.
- ☐ Imam Mohammad Ibn Saud Islamic University, Riyadh. جامعة الإمام محمد بن سعود الإسلامية، الرياض.
- ☐ King Khalid University, Abha. جامعة الملك خالد، أبها.
- ☐ King Fahd University of Petroleum and Minerals, Dhahran. جامعة الملك فهد للمعادن والبتترول، الظهران.
- ☐ Taibah University, Madinah. جامعة طيبة، المدينة.
- ☐ Jazan University, Jazan. جامعة جازان، جازان.
- ☐ Tabuk University, Tabuk. جامعة تبوك، تبوك.
- ☐ Other: \_\_\_\_\_

6. **Program** \* البرنامج الدراسي

Mark only one oval.

- ☐ Preparatory Year السنة التحضيرية
- ☐ Medicine الطب
- ☐ Dentistry طب الأسنان
- ☐ Pharmacy الصيدلة
- ☐ Radiology الأشعة
- ☐ Nursing التمريض
- ☐ Physical Therapy العلاج الفيزيائي
- ☐ Respiratory Therapy العلاج التنفسي
- ☐ Occupational Therapy العلاج الوظيفي
- ☐ Healthcare Administration الإدارة الصحية
- ☐ Other: \_\_\_\_\_

7. **Year of Study** \* السنة الأكاديمية

Mark only one oval.

- ☐ Preparatory Year السنة التحضيرية
- ☐ 1st year السنة الأولى
- ☐ 2nd year السنة الثانية
- ☐ 3rd year السنة الثالثة
- ☐ 4th year السنة الرابعة
- ☐ 5th year السنة الخامسة
- ☐ intern إنترن
- ☐ Postgraduate (e.g. MSc. or PhD) دراسات عليا (ماجستير أو دكتوراه)
- ☐ Other: \_\_\_\_\_

8. **GPA** \* المعدل الدراسي

Mark only one oval.

- ☐ ≤3.5
- ☐ 3.5-4
- ☐ 4-4.5
- ☐ >4.5

**Awareness of Health Majors Students towards Artificial Intelligence** وعي طلاب التخصصات الطبية اتجاه الذكاء الاصطناعي

9. **What is the definition of Artificial Intelligence (AI)?** \*

ماهو تعريف الذكاء الاصطناعي؟

Mark only one oval.

- ☐ It is simulating human attitudes and abilities using computers and technology by teaching machines how humans think, behave, and react toward different situations. هو سلوك وخصائص معينة تتسم بها البرامج الحاسوبية، تجعلها تحاكي القدرات الذهنية البشرية. وأنماط عملها.
- ☐ It is a medical dictionary used by healthcare consumers, students, and professionals. إنه قاموس طبي يستخدمه جمهور الرعاية الصحية والطلاب والمهنيين.
- ☐ It is a type of medical drug used to improve intelligence, but it causes side effects such as skin rashes. هو نوع من الأدوية الطبية يستخدم لتحسين الذكاء ، لكنه يسبب آثاراً جانبية مثل الطفح الجلدي

10. What are your sources of information about artificial intelligence? \*

ما هي مصادر معلوماتك حول الذكاء الاصطناعي؟

*Tick all that apply.*

- ☐ Academic courses المناهج الدراسية
- ☐ Print Media (books, magazines, newspapers). وسائل الإعلام المطبوعة (كتب، مجلات، صحف).
- ☐ Broadcast Media (TV, Radio). وسائل الإعلام المرئية (تلفزيون ، راديو)
- ☐ Outdoor Media (e.g. Billboards, Transit Ads,..). وسائل الإعلام الخارجية (مثل اللوحات الإعلانية والجدارية،..)
- ☐ Social Media (Facebook, Instagram, Snapchat, Tweeter,...). وسائل التواصل الاجتماعي.
- ☐ Internet (web pages, online databases,...). الإنترنت (صفحات الويب، قواعد البيانات، ...)
- ☐ Video games. ألعاب الفيديو.
- ☐ Family members. أفراد الأسرة.
- ☐ Friends. أصدقاء.
- ☐ Other: \_\_\_\_\_

11. Did you attend courses about artificial intelligence and data science in the last 5 years? \*

هل حضرت دورات حول الذكاء الاصطناعي في السنوات الخمس الماضية؟

*Mark only one oval.*

- ☐ No لا
- ☐ Yes- as a personal effort. نعم كمرغبة شخصية.
- ☐ Yes- as a part of university curriculum. نعم كمنهج دراسي في الجامعة.

Attitudes of Health Majors Students towards Artificial Intelligence سلوكيات طلاب التخصصات الطبية تجاه الذكاء الاصطناعي

12. Do you think that AI will play an important role in healthcare in the future? \*

هل تعتقد أن الذكاء الاصطناعي سيلعب دورًا مهمًا في الرعاية الصحية في المستقبل؟

*Mark only one oval.*

- ☐ No لا
- ☐ Yes نعم
- ☐ Do not know لا أعلم

13. Do you think that personal AI knowledge will improve the performance? \*

هل تعتقد أن المعرفة الشخصية للذكاء الاصطناعي ستحسن الأداء؟

*Mark only one oval.*

- ☐ No لا
- ☐ Yes نعم
- ☐ Do not know لا أعلم

14. Do you believe that teaching in AI would be beneficial for their medical careers? \*

هل تعتقد أن تعلم الذكاء الاصطناعي للطلبة سيكون مفيداً لمهنتهم الطبية؟

Mark only one oval.

- ☐ No لا  
☐ Yes نعم  
☐ Do not know لا أعلم

15. Do you think that some specialties will be replaced by AI in the future? \*

هل تعتقد أنه سيتم استبدال بعض التخصصات بالذكاء الاصطناعي في المستقبل؟

Mark only one oval.

- ☐ No لا  
☐ Yes نعم  
☐ Do not know لا أعلم

16. Do you think confidentiality in the use of AI tools for primary healthcare is required? \*

هل تعتقد أن السرية في استخدام أدوات الذكاء الاصطناعي للرعاية الصحية الأولية مطلوبة؟

Mark only one oval.

- ☐ No لا  
☐ Yes نعم  
☐ Do not know لا أعلم

17. Do you think whether AI will drastically change and revolutionize the medical field in 10 years? \*

هل تعتقد ما إذا كان الذكاء الاصطناعي سيغير بشكل جذري ويحدث ثورة في المجال الطبي في غضون 10 سنوات؟

Mark only one oval.

- ☐ No لا  
☐ Yes نعم  
☐ Do not know لا أعلم

18. Do you believe that all medical students should receive training in AI (mandatory need) as part of the curriculum to get their degree? \*

هل تعتقد أن جميع طلاب التخصصات الطبية يجب أن يتلقوا تدريباً على الذكاء الاصطناعي (حاجة إلزامية) كجزء من مناهجهم الدراسية للحصول على الشهادة الجامعية؟

Mark only one oval.

- ☐ No لا  
☐ Yes نعم  
☐ Do not know لا أعلم

19. Are you interested in improving your knowledge of AI? \*

هل أنت مهتم بتحسين معرفتك بالذكاء الاصطناعي؟

Mark only one oval.

- ☐ No لا
- ☐ Yes نعم
- ☐ Do not know لا أعلم

Knowledge of Health Majors Students towards Artificial Intelligence معرفة طلاب التخصصات الطبية اتجاه الذكاء الاصطناعي

20. Do you have an understanding of the basic principles that underpin AI? \*

هل لديك فهم للمبادئ الأساسية التي يقوم عليها الذكاء الاصطناعي؟

Mark only one oval.

- ☐ No لا
- ☐ Yes نعم
- ☐ Do not know لا أعلم

21. Did you know that the **types** of artificial intelligence based on **capabilities** are **Narrow** (dedicated for one task), **General** (perform like human) and **Super AI** (intelligent than human)? \*

هل تعلم أن أنواع الذكاء الاصطناعي المبنية على القدرات هي الضيق (مخصصة لمهمة واحدة) ، العام (أداء مثل الإنسان) و الخارق (أذكى من الإنسان)؟

Mark only one oval.

- ☐ No لا
- ☐ Yes نعم
- ☐ Do not know لا أعلم

22. Did you know that the **types** of artificial intelligence based on **functions** are **Reactive Machines** (Machine Learning), **Limited Memory** (Deep Learning), **Theory of Mind** (Emotions and interactions) **Self-Awareness** (future machines will have their own self- consciousness and sentiments)? \*

هل تعلم أن أنواع الذكاء الاصطناعي القائمة على الوظائف هي: الآلات التفاعلية (التعلم الآلي)، والذاكرة المحدودة (التعلم العميق)، ونظرية العقل (العواطف والتفاعلات)، والوعي الذاتي (سيكون للآلات المستقبلية وعيها الذاتي ومشاعرها)؟

Mark only one oval.

- ☐ No لا
- ☐ Yes نعم
- ☐ Do not know لا أعلم

23. Did you know that AI Programming Cognitive **Skills: Learning, Reasoning** and **Self-Correction**? \*
- هل تعلم أن المهارات المعرفية لبرمجة الذكاء الاصطناعي: التعلم والاستدلال والتصحيح الذاتي؟

*Mark only one oval.*

- ☐ No لا
- ☐ Yes نعم
- ☐ Do not know لا أعلم

---

This content is neither created nor endorsed by Google.

Google Forms

# Awareness, Attitudes and Knowledge towards Artificial Intelligence among Students of Health Majors in Saudi Universities

## الوعي والسلوكيات والمعرفة تجاه الذكاء الاصطناعي لدى طلاب التخصصات الصحية في الجامعات السعودية

This research is conducted by Batterjee Medical College. It is studying the awareness, attitude, and knowledge among students of health majors towards Artificial Intelligence (AI) in Saudi universities. This research has been ethically reviewed and approved by the Research Unit at Batterjee Medical College (proposal number: xxxxx). Participation in this survey is not mandatory. Your information will remain confidential and will not be viewed by any third party. This survey does not contain any risks, and you can withdraw from it at any stage. By participating, you consent for your data to be analyzed. If you have any question regarding the questionnaire or the study as a whole, kindly contact the author at mai.albaik@bmc.edu.sa

تم إجراء هذا البحث من قبل كلية البترجي الطبية. يدرس البحث "الوعي والسلوكيات والمعرفة تجاه الذكاء الاصطناعي لدى طلاب التخصصات الصحية بين الجامعات السعودية". تمت مراجعة هذه الدراسة أخلاقياً من قبل وحدة الأبحاث في كلية البترجي الطبية (المقترح البحثي رقم: xxxxx).

المشاركة في هذا الاستطلاع ليست إلزامية. متبقى معلوماتك سرية ولن يطلع عليها أي طرف ثالث. لا يحتوي هذا الاستطلاع على أي مخاطر، ويمكنك الانسحاب منه في أي مرحلة. إذا كان لديك أي أسئلة أو استفسارات بخصوص الاستبيان أو البحث فإمكانكم التواصل معنا على البريد الإلكتروني mai.albaik@bmc.edu.sa

من خلال المشاركة، فإنك توافق على تحليل بياناتك.

\* Indicates required question

1. Do you consent to participating in this research? \*  
هل توافق على المشاركة في هذا البحث؟

Mark only one oval.

☐ Agree أوافق

### Personal Information المعلومات الشخصية

2. Gender الجنس \*

Mark only one oval.

☐ Male ذكر

☐ Female أنثى

3. Age العمر \*  
Please write your age: رجاء اكتب عمرك

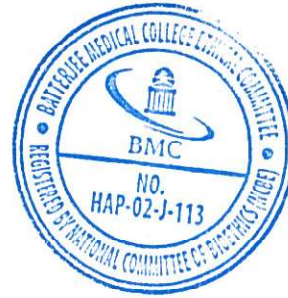



4. Nationality \* الجنسية \*

Mark only one oval.

- ☐ Saudi سعودي
- ☐ Non-Saudi غير سعودي

5. University \* الجامعة \*

Mark only one oval.

- ☐ Batterjee Medical College, Jeddah. كلية البترجي الطبية، جدة
- ☐ King Abdulaziz University, Jeddah. جامعة الملك عبد العزيز، جدة
- ☐ Jeddah Unoversity, Jeddah. جامعة جدة، جدة
- ☐ Umm Al Qura University, Makkah. جامعة أم القرى، مكة
- ☐ King Saud University, Riyadh. جامعة الملك سعود، الرياض
- ☐ King Faisal University, Riyadh. جامعة الملك فيصل، الرياض
- ☐ King Khalid University, Abha. جامعة الملك خالد، أبها
- ☐ King Fahd University of Petroleum and Minerals, Dhahran. جامعة الملك فهد للبترول والمعادن، الظهران
- ☐ Taibah University, Madinah. جامعة طيبة، المدينة
- ☐ Jazan University, Jazan. جامعة جازان، جازان
- ☐ Tabuk University, Tabuk. جامعة تبوك، تبوك
- ☐ Other: \_\_\_\_\_

6. Program \* البرنامج الدراسي \*

Mark only one oval.

- ☐ Preparatory Year السنة التحضيرية
- ☐ Medicine الطب
- ☐ Dentistry طب الأسنان
- ☐ Pharmacy الصيدلة
- ☐ Radiology الأشعة
- ☐ Nursing التمريض
- ☐ Physical Therapy العلاج الفيزيائي
- ☐ Respiratory Therapy العلاج التنفسي
- ☐ Occupational Therapy العلاج الوظيفي
- ☐ Healthcare Administration الإدارة الصحية
- ☐ Other: \_\_\_\_\_

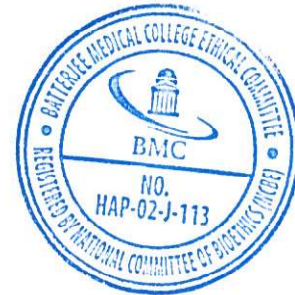

7. Year of Study \* السنة الأكاديمية

Mark only one oval.

- ☐ Preparatory Year السنة التحضيرية
- ☐ 1st year السنة الأولى
- ☐ 2nd year السنة الثانية
- ☐ 3rd year السنة الثالثة
- ☐ 4th year السنة الرابعة
- ☐ 5th year السنة الخامسة

8. GPA \* المعدل الدراسي

Mark only one oval.

- ☐  $\leq 3.5$
- ☐ 3.5-4
- ☐ 4-4.5
- ☐  $> 4.5$

9. Do you receive Artificial Intelligence (AI) teaching? \*

هل تتلقى تعليم يتعلق بالذكاء الاصطناعي؟

Mark only one oval.

- ☐ Yes نعم
- ☐ No لا

Awareness of Health Majors Students towards Artificial Intelligence وعي طلاب التخصصات الطبية اتجاه الذكاء الاصطناعي

10. What is the definition of Artificial Intelligence (AI)? \*

ما هو تعريف الذكاء الاصطناعي؟

Mark only one oval.

- ☐ It is simulating human attitudes and abilities using computers and technology by teaching machines how humans think, behave, and react toward different situations. هو سلوك وخصائص معينة تتسم بها البرامج الحاسوبية، تجعلها تحاكي القرارات. الذهنية البشرية وأنماط عملها.
- ☐ It is a medical dictionary used by healthcare consumers, students, and professionals. إنه قاموس طبي يستخدمه جمهور الرعاية الصحية والطلاب والمهنيين.
- ☐ It is a type of medical drug used to improve intelligence, but it causes side effects such as skin rashes. هو نوع من الأدوية الطبية يستخدم لتحسين الذكاء ، لكنه يسبب آثارًا جانبية مثل الطفح الجلدي.

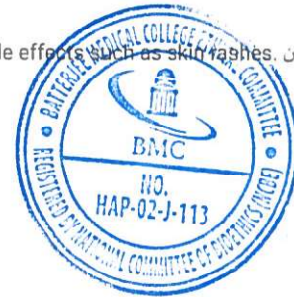

11. What are your sources of information about artificial intelligence? \*

ما هي مصادر معلوماتك حول الذكاء الاصطناعي؟

Tick all that apply.

- ☐ Academic courses المناهج الدراسية
- ☐ Print Media (books, magazines, newspapers). وسائل الإعلام المطبوعة (كتب، مجلات، صحف).
- ☐ Broadcast Media (TV, Radio). وسائل الإعلام المرئية (تلفزيون، راديو).
- ☐ Outdoor Media (e.g. Billboards, Transit Ads,...). وسائل الإعلام الخارجية (مثل اللوحات الإعلانية والجدارية...).
- ☐ Social Media (Facebook, Instagram, Snapchat, Tweeter,...). وسائل التواصل الاجتماعي.
- ☐ Internet (web pages, online databases,...). الإنترنت (صفحات الويب، قواعد البيانات...).
- ☐ Video games. ألعاب الفيديو.
- ☐ Family members. أفراد الأسرة.
- ☐ Friends. أصدقاء.
- ☐ Other: \_\_\_\_\_

12. Did you attend courses about artificial intelligence and data science in the last 5 years? \*

هل حضرت دورات حول الذكاء الاصطناعي في السنوات الخمس الماضية؟

Mark only one oval.

- ☐ No لا
- ☐ Yes- as a personal effort. نعم كمرغبة شخصية.
- ☐ Yes- as a part of university curriculum. نعم كمنهج دراسي في الجامعة.

Attitudes of Health Majors Students towards Artificial Intelligence سلوكيات طلاب التخصصات الطبية تجاه الذكاء الاصطناعي

13. Do you think that AI will play an important role in healthcare in the future? \*

هل تعتقد أن الذكاء الاصطناعي سيلعب دورًا مهمًا في الرعاية الصحية في المستقبل؟

Mark only one oval.

- ☐ No لا
- ☐ Yes نعم
- ☐ Do not know لا أعلم

14. Do you think that personal AI knowledge will improve the performance? \*

هل تعتقد أن المعرفة الشخصية للذكاء الاصطناعي ستحسن الأداء؟

Mark only one oval.

- ☐ No لا
- ☐ Yes نعم
- ☐ Do not know لا أعلم

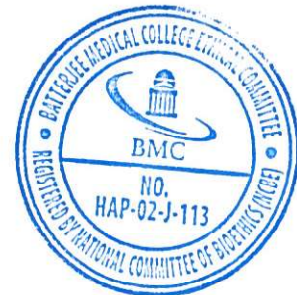

15. Do you believe that teaching in AI would be beneficial for their medical careers? \*

هل تعتقد أن تعلم الذكاء الاصطناعي للطلبة سيكون مفيداً لمهنتهم الطبية؟

Mark only one oval.

- ☐ No لا  
☐ Yes نعم  
☐ Do not know لا أعلم

16. Do you think that some specialties will be replaced by AI in the future? \*

هل تعتقد أنه سيتم استبدال بعض التخصصات بالذكاء الاصطناعي في المستقبل؟

Mark only one oval.

- ☐ No لا  
☐ Yes نعم  
☐ Do not know لا أعلم

17. Do you think confidentiality in the use of AI tools for primary healthcare is required? \*

هل تعتقد أن السرية في استخدام أدوات الذكاء الاصطناعي للرعاية الصحية الأولية مطلوبة؟

Mark only one oval.

- ☐ No لا  
☐ Yes نعم  
☐ Do not know لا أعلم

18. Do you think whether AI will drastically change and revolutionize the medical field in 10 years? \*

هل تعتقد ما إذا كان الذكاء الاصطناعي سيغير بشكل جذري ويحدث ثورة في المجال الطبي في غضون 10 سنوات؟

Mark only one oval.

- ☐ No لا  
☐ Yes نعم  
☐ Do not know لا أعلم

19. Do you believe that all medical students should receive training in AI (mandatory need) as part of the curriculum to get their degree? \*

هل تعتقد أن جميع طلاب التخصصات الطبية يجب أن يتلقوا تدريباً على الذكاء الاصطناعي (حاجة إلزامية) كجزء من مناهجهم الدراسية للحصول على الشهادة الجامعية؟

Mark only one oval.

- ☐ No لا  
☐ Yes نعم  
☐ Do not know لا أعلم

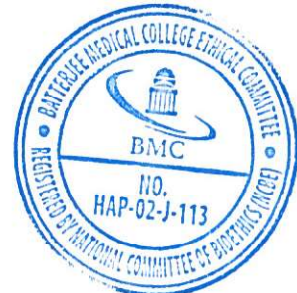

20. Are you interested in improving your knowledge of AI? \*

هل أنت مهتم بتحسين معرفتك بالذكاء الاصطناعي؟

Mark only one oval.

- ☐ No لا
- ☐ Yes نعم
- ☐ Do not know لا أعلم

Knowledge of Health Majors Students towards Artificial Intelligence معرفة طلاب التخصصات الطبية اتجاه الذكاء الاصطناعي

21. Do you have an understanding of the basic principles that underpin AI? \*

هل لديك فهم للمبادئ الأساسية التي يقوم عليها الذكاء الاصطناعي؟

Mark only one oval.

- ☐ No لا
- ☐ Yes نعم
- ☐ Do not know لا أعلم

22. Did you know that the **types** of artificial intelligence based on **capabilities** are **Narrow** (dedicated for one task), **General** (perform like human) and **Super AI** (intelligent than human)? \*

هل تعلم أن أنواع الذكاء الاصطناعي المبني على القدرات هي الضيق (مخصصة لمهمة واحدة) ، العام (أداء مثل الإنسان) و الخارق (أذكى من الإنسان)؟

Mark only one oval.

- ☐ No لا
- ☐ Yes نعم
- ☐ Do not know لا أعلم

23. Did you know that the **types** of artificial intelligence based on **functions** are **Reactive Machines** (Machine Learning), **Limited Memory** (Deep Learning), **Theory of Mind** (Emotions and interactions) **Self-Awareness** (future machines will have their own self- consciousness and sentiments)? \*

هل تعلم أن أنواع الذكاء الاصطناعي القائمة على الوظائف هي: الآلات التفاعلية (التعلم الآلي)، والذاكرة المحدودة (التعلم العميق)، ونظرية العقل (العواطف والتفاعلات)، والوعي الذاتي (سيكون للآلات المستقبلية وعيها الذاتي ومشاعرها)؟

Mark only one oval.

- ☐ No لا
- ☐ Yes نعم
- ☐ Do not know لا أعلم

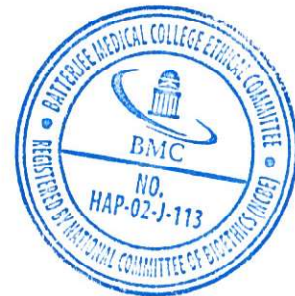

24. Did you know that AI Programming Cognitive **Skills: Learning, Reasoning and Self-Correction?** \*  
هل تعلم أن المهارات المعرفية لبرمجة الذكاء الاصطناعي: التعلم والاستدلال والتصحيح الذاتي؟

Mark only one oval.

- ☐ No لا  
☐ Yes نعم  
☐ Do not know لا أعلم

25. Thank you for taking the time to complete this survey.

شكرا لك على الوقت الذي استغرقته لاستكمال هذا الاستطلاع

---

---

---

---

---

This content is neither created nor endorsed by Google.

Google Forms

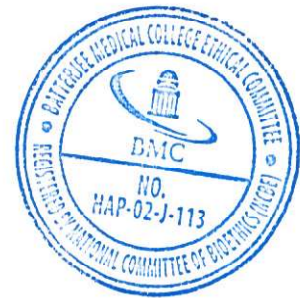

Supplement: RES20230055_Questionnaire.pdf [file RES20230055_Questionnaire.pdf]
