# Supplementary material for: Exploring perspectives on artificial intelligence: awareness, attitudes, and knowledge among health majors students at Saudi universities
Source: PeerJ journal article supplement (doi:10.7717/peerj-cs.3255), 2025-10-07
Supplement: Raw_Data_Artificial_Intelligence_study_(Final_Responses).xlsx [file Raw_Data_Artificial_Intelligence_study_%28Final_Responses%29.xlsx]

## Sheet: Form responses 1
Do you consent to participating in this research? هل توافق على المشاركة في هذا البحث؟	Gender الجنس	Age العمر Please write your age: رجاء اكتب عمرك	Nationality الجنسية	University الجامعة	Program البرنامج الدراسي	Year of Study السنة الاكاديمية	GPA المعدل الدراسي	What is the definition of Artificial Intelligence (AI)? ماهو تعريف الذكاء الاصطناعي؟	What are your sources of information about artificial intelligence? ما هي مصادر معلوماتك حول الذكاء الاصطناعي؟	Did you attend courses about artificial intelligence and data science in the last 5 years? هل حضرت دورات حول الذكاء الاصطناعي في السنوات الخمس الماضية؟	Do you think that AI will play an important role in healthcare in the future? هل تعتقد أن الذكاء الاصطناعي سيلعب دورًا مهمًا في الرعاية الصحية في المستقبل؟	Do you think that personal AI knowledge will improve the performance? هل تعتقد أن المعرفة الشخصية للذكاء الاصطناعي ستحسن الأداء؟	Do you believe that teaching in AI would be beneficial for their medical careers? هل تعتقد أن تعلم الذكاء الاصطناعي للطلبة سيكون مفيدًا لمهنهم الطبية؟	Do you think that some specialties will be replaced by AI in the future? هل تعتقد أنه سيتم استبدال بعض التخصصات بالذكاء الاصطناعي في المستقبل؟	Do you think confidentiality in the use of AI tools for primary healthcare is required? هل تعتقد أن السرية في استخدام أدوات الذكاء الاصطناعي للرعاية الصحية الأولية مطلوبة؟	Do you think whether AI will drastically change and revolutionize the medical field in 10 years? هل تعتقد ما إذا كان الذكاء الاصطناعي سيغير بشكل جذري ويحدث ثورة في المجال الطبي في غضون 10 سنوات؟	Do you believe that all medical students should receive training in AI (mandatory need) as part of the curriculum to get their degree? هل تعتقد أن جميع طلاب التخصصات الطبية يجب أن يتلقوا تدريبًا على الذكاء الاصطناعي (حاجة إلزامية) كجزء من مناهجهم الدراسية للحصول على الشهادة الجامعية؟	Are you interested in improving your knowledge of AI? هل أنت مهتم بتحسين معرفتك بالذكاء الاصطناعي؟	Do you have an understanding of the basic principles that underpin AI? هل لديك فهم للمبادئ الأساسية التي يقوم عليها الذكاء الاصطناعي؟	Did you know that the types of artificial intelligence based on capabilities are Narrow (dedicated for one task), General (perform like human) and Super AI (intelligent than human)? هل تعلم أن أنواع الذكاء الاصطناعي المبنية على القدرات هي الضيق (مخصصة لمهمة واحدة) ، العام (أداء مثل الإنسان) و الخارق (أذكى من الإنسان)؟	Did you know that the types of artificial intelligence based on functions are Reactive Machines (Machine Learning), Limited Memory (Deep Learning), Theory of Mind (Emotions and interactions) Self-Awareness (future machines will have their own self- consciousness and sentiments)? هل تعلم أن أنواع الذكاء الاصطناعي القائمة على الوظائف هي: الآلات التفاعلية (التعلم الآلي)، والذاكرة المحدودة (التعلم ال…	Did you know that AI Programming Cognitive Skills: Learning, Reasoning and Self-Correction? هل تعلم أن المهارات المعرفية لبرمجة الذكاء الاصطناعي: التعلم والاستدلال والتصحيح الذاتي؟
Agree أوافق	Female أنثى	24	Saudi سعودي	Batterjee Medical College, Jeddah. كلية البترجي الطبية، جدة	Nursing التمريض	4th year السنة الرابعة	3.5-4	It is simulating human attitudes and abilities using computers and technology by teaching machines how humans think, behave, and react toward different situations. هو سلوك وخصائص معينة تتسم بها البرامج الحاسوبية، تجعلها تحاكي القدرات الذهنية البشرية وأنماط عملها.	Academic courses المناهج الدراسية, Print Media (books, magazines, newspapers). وسائل الإعلام المطبوعة (كتب، مجلات، صحف)., Broadcast Media (TV, Radio). وسائل الإعلام المرئية (تلفزيون ، راديو), Outdoor Media (e.g.Billboards, Transit Ads,..). وسائل الإعلام الخارجية (مثل اللوحات الإعلانية والجدارية،..), Social Media (Facebook, Instagram, Snapchat, Tweeter,…). وسائل التواصل الاجتماعي, Internet (web pa…	Yes- as a personal effort. نعم كرغبة شخصية	Yes نعم	Yes نعم	Yes نعم	Yes نعم	Yes نعم	Yes نعم	Yes نعم	Yes نعم	Yes نعم	No لا	Yes نعم	Yes نعم
Agree أوافق	Female أنثى	23	Non-Saudi غير سعودي	Batterjee Medical College, Jeddah. كلية البترجي الطبية، جدة	Physical Therapy العلاج الفيزيائي	4th year السنة الرابعة	>4.5	It is simulating human attitudes and abilities using computers and technology by teaching machines how humans think, behave, and react toward different situations. هو سلوك وخصائص معينة تتسم بها البرامج الحاسوبية، تجعلها تحاكي القدرات الذهنية البشرية وأنماط عملها.	Academic courses المناهج الدراسية, Video games. ألعاب الفيديو	No لا	Yes نعم	Yes نعم	Do not know لا أعلم	No لا	Yes نعم	Yes نعم	No لا	Yes نعم	Do not know لا أعلم	Do not know لا أعلم	Do not know لا أعلم	Do not know لا أعلم
Agree أوافق	Male ذكر	24	Non-Saudi غير سعودي	Batterjee Medical College, Jeddah. كلية البترجي الطبية، جدة	Medicine الطب	5th year السنة الخامسة	4-4.5	It is simulating human attitudes and abilities using computers and technology by teaching machines how humans think, behave, and react toward different situations. هو سلوك وخصائص معينة تتسم بها البرامج الحاسوبية، تجعلها تحاكي القدرات الذهنية البشرية وأنماط عملها.	Print Media (books, magazines, newspapers). وسائل الإعلام المطبوعة (كتب، مجلات، صحف)., Broadcast Media (TV, Radio). وسائل الإعلام المرئية (تلفزيون ، راديو), Social Media (Facebook, Instagram, Snapchat, Tweeter,…). وسائل التواصل الاجتماعي, Internet (web pages, online databases,...). الإنترنت (صفحات الويب، قواعد البيانات، ...), Video games. ألعاب الفيديو, Friends. أصدقاء	No لا	Yes نعم	Yes نعم	Yes نعم	No لا	Yes نعم	Yes نعم	Yes نعم	No لا	No لا	No لا	Yes نعم	Yes نعم
Agree أوافق	Male ذكر	24	Non-Saudi غير سعودي	Batterjee Medical College, Jeddah. كلية البترجي الطبية، جدة	Medicine الطب	5th year السنة الخامسة	4-4.5	It is simulating human attitudes and abilities using computers and technology by teaching machines how humans think, behave, and react toward different situations. هو سلوك وخصائص معينة تتسم بها البرامج الحاسوبية، تجعلها تحاكي القدرات الذهنية البشرية وأنماط عملها.	Academic courses المناهج الدراسية, Outdoor Media (e.g.Billboards, Transit Ads,..). وسائل الإعلام الخارجية (مثل اللوحات الإعلانية والجدارية،..), Social Media (Facebook, Instagram, Snapchat, Tweeter,…). وسائل التواصل الاجتماعي, Internet (web pages, online databases,...). الإنترنت (صفحات الويب، قواعد البيانات، ...), Friends. أصدقاء	No لا	Yes نعم	Do not know لا أعلم	Yes نعم	Yes نعم	No لا	Yes نعم	Yes نعم	Yes نعم	Do not know لا أعلم	No لا	Yes نعم	Yes نعم
Agree أوافق	Female أنثى	25	Saudi سعودي	Batterjee Medical College, Jeddah. كلية البترجي الطبية، جدة	Nursing التمريض	4th year السنة الرابعة	3.5-4	It is simulating human attitudes and abilities using computers and technology by teaching machines how humans think, behave, and react toward different situations. هو سلوك وخصائص معينة تتسم بها البرامج الحاسوبية، تجعلها تحاكي القدرات الذهنية البشرية وأنماط عملها.	Broadcast Media (TV, Radio). وسائل الإعلام المرئية (تلفزيون ، راديو)	No لا	Do not know لا أعلم	Do not know لا أعلم	Yes نعم	Yes نعم	Yes نعم	Yes نعم	No لا	Yes نعم	Yes نعم	No لا	Do not know لا أعلم	No لا
Agree أوافق	Female أنثى	20	Non-Saudi غير سعودي	Batterjee Medical College, Jeddah. كلية البترجي الطبية، جدة	Pharmacy الصيدلة	3rd year السنة الثالثة	4-4.5	It is simulating human attitudes and abilities using computers and technology by teaching machines how humans think, behave, and react toward different situations. هو سلوك وخصائص معينة تتسم بها البرامج الحاسوبية، تجعلها تحاكي القدرات الذهنية البشرية وأنماط عملها.	Social Media (Facebook, Instagram, Snapchat, Tweeter,…). وسائل التواصل الاجتماعي	No لا	Yes نعم	Yes نعم	Yes نعم	Yes نعم	Do not know لا أعلم	Yes نعم	Yes نعم	Yes نعم	Do not know لا أعلم	Do not know لا أعلم	Yes نعم	Do not know لا أعلم
Agree أوافق	Female أنثى	22	Saudi سعودي	Batterjee Medical College, Jeddah. كلية البترجي الطبية، جدة	Pharmacy الصيدلة	3rd year السنة الثالثة	3.5-4	It is simulating human attitudes and abilities using computers and technology by teaching machines how humans think, behave, and react toward different situations. هو سلوك وخصائص معينة تتسم بها البرامج الحاسوبية، تجعلها تحاكي القدرات الذهنية البشرية وأنماط عملها.	Video games. ألعاب الفيديو	No لا	Yes نعم	Yes نعم	Yes نعم	Do not know لا أعلم	Yes نعم	Yes نعم	No لا	Yes نعم	Yes نعم	No لا	No لا	Yes نعم
Agree أوافق	Male ذكر	20	Non-Saudi غير سعودي	Batterjee Medical College, Jeddah. كلية البترجي الطبية، جدة	Medicine الطب	2nd year السنة الثانية	>4.5	It is simulating human attitudes and abilities using computers and technology by teaching machines how humans think, behave, and react toward different situations. هو سلوك وخصائص معينة تتسم بها البرامج الحاسوبية، تجعلها تحاكي القدرات الذهنية البشرية وأنماط عملها.	Print Media (books, magazines, newspapers). وسائل الإعلام المطبوعة (كتب، مجلات، صحف)., Broadcast Media (TV, Radio). وسائل الإعلام المرئية (تلفزيون ، راديو), Outdoor Media (e.g.Billboards, Transit Ads,..). وسائل الإعلام الخارجية (مثل اللوحات الإعلانية والجدارية،..), Social Media (Facebook, Instagram, Snapchat, Tweeter,…). وسائل التواصل الاجتماعي, Internet (web pages, online databases,...). الإنترن…	No لا	Yes نعم	Yes نعم	Yes نعم	Do not know لا أعلم	Yes نعم	Do not know لا أعلم	Yes نعم	Yes نعم	Do not know لا أعلم	Do not know لا أعلم	No لا	No لا
Agree أوافق	Female أنثى	25	Non-Saudi غير سعودي	Batterjee Medical College, Jeddah. كلية البترجي الطبية، جدة	Occupational Therapy العلاج الوظيفي	3rd year السنة الثالثة	≤3.5	It is simulating human attitudes and abilities using computers and technology by teaching machines how humans think, behave, and react toward different situations. هو سلوك وخصائص معينة تتسم بها البرامج الحاسوبية، تجعلها تحاكي القدرات الذهنية البشرية وأنماط عملها.	Academic courses المناهج الدراسية, Print Media (books, magazines, newspapers). وسائل الإعلام المطبوعة (كتب، مجلات، صحف)., Broadcast Media (TV, Radio). وسائل الإعلام المرئية (تلفزيون ، راديو), Outdoor Media (e.g.Billboards, Transit Ads,..). وسائل الإعلام الخارجية (مثل اللوحات الإعلانية والجدارية،..), Social Media (Facebook, Instagram, Snapchat, Tweeter,…). وسائل التواصل الاجتماعي, Internet (web pa…	No لا	Yes نعم	Yes نعم	Yes نعم	Yes نعم	Yes نعم	Yes نعم	Yes نعم	Yes نعم	Yes نعم	No لا	Yes نعم	No لا
Agree أوافق	Female أنثى	21	Saudi سعودي	Batterjee Medical College, Jeddah. كلية البترجي الطبية، جدة	Respiratory Therapy العلاج التنفسي	1st year السنة الأولى	≤3.5	It is a medical dictionary used by healthcare consumers, students, and professionals. إنه قاموس طبي يستخدمه جمهور الرعاية الصحية والطلاب والمهنيون.	Academic courses المناهج الدراسية, Print Media (books, magazines, newspapers). وسائل الإعلام المطبوعة (كتب، مجلات، صحف)., Broadcast Media (TV, Radio). وسائل الإعلام المرئية (تلفزيون ، راديو), Outdoor Media (e.g.Billboards, Transit Ads,..). وسائل الإعلام الخارجية (مثل اللوحات الإعلانية والجدارية،..), Social Media (Facebook, Instagram, Snapchat, Tweeter,…). وسائل التواصل الاجتماعي, Internet (web pa…	No لا	Yes نعم	Yes نعم	Yes نعم	Yes نعم	Yes نعم	Yes نعم	Do not know لا أعلم	Yes نعم	Yes نعم	Do not know لا أعلم	Do not know لا أعلم	Do not know لا أعلم
Agree أوافق	Female أنثى	22	Saudi سعودي	Batterjee Medical College, Jeddah. كلية البترجي الطبية، جدة	Medicine الطب	2nd year السنة الثانية	3.5-4	It is simulating human attitudes and abilities using computers and technology by teaching machines how humans think, behave, and react toward different situations. هو سلوك وخصائص معينة تتسم بها البرامج الحاسوبية، تجعلها تحاكي القدرات الذهنية البشرية وأنماط عملها.	Academic courses المناهج الدراسية, Social Media (Facebook, Instagram, Snapchat, Tweeter,…). وسائل التواصل الاجتماعي, Family members. أفراد الأسرة	No لا	Yes نعم	Yes نعم	Yes نعم	No لا	Do not know لا أعلم	Yes نعم	Yes نعم	Yes نعم	Yes نعم	Yes نعم	Do not know لا أعلم	Yes نعم
Agree أوافق	Male ذكر	21	Saudi سعودي	Batterjee Medical College, Jeddah. كلية البترجي الطبية، جدة	Nursing التمريض	1st year السنة الأولى	≤3.5	It is simulating human attitudes and abilities using computers and technology by teaching machines how humans think, behave, and react toward different situations. هو سلوك وخصائص معينة تتسم بها البرامج الحاسوبية، تجعلها تحاكي القدرات الذهنية البشرية وأنماط عملها.	Academic courses المناهج الدراسية, Internet (web pages, online databases,...). الإنترنت (صفحات الويب، قواعد البيانات، ...), Video games. ألعاب الفيديو, Friends. أصدقاء	Yes- as a personal effort. نعم كرغبة شخصية	Yes نعم	Yes نعم	Yes نعم	Yes نعم	No لا	No لا	No لا	Yes نعم	Yes نعم	Yes نعم	Do not know لا أعلم	Yes نعم
Agree أوافق	Male ذكر	21	Non-Saudi غير سعودي	Batterjee Medical College, Jeddah. كلية البترجي الطبية، جدة	Medicine الطب	2nd year السنة الثانية	3.5-4	It is simulating human attitudes and abilities using computers and technology by teaching machines how humans think, behave, and react toward different situations. هو سلوك وخصائص معينة تتسم بها البرامج الحاسوبية، تجعلها تحاكي القدرات الذهنية البشرية وأنماط عملها.	Social Media (Facebook, Instagram, Snapchat, Tweeter,…). وسائل التواصل الاجتماعي	No لا	Yes نعم	Yes نعم	Yes نعم	Yes نعم	Yes نعم	Yes نعم	Yes نعم	Yes نعم	No لا	No لا	No لا	No لا
Agree أوافق	Female أنثى	21	Non-Saudi غير سعودي	Batterjee Medical College, Jeddah. كلية البترجي الطبية، جدة	Medicine الطب	2nd year السنة الثانية	>4.5	It is simulating human attitudes and abilities using computers and technology by teaching machines how humans think, behave, and react toward different situations. هو سلوك وخصائص معينة تتسم بها البرامج الحاسوبية، تجعلها تحاكي القدرات الذهنية البشرية وأنماط عملها.	Academic courses المناهج الدراسية, Broadcast Media (TV, Radio). وسائل الإعلام المرئية (تلفزيون ، راديو), Social Media (Facebook, Instagram, Snapchat, Tweeter,…). وسائل التواصل الاجتماعي, Family members. أفراد الأسرة	No لا	Do not know لا أعلم	Yes نعم	Do not know لا أعلم	Do not know لا أعلم	No لا	Yes نعم	Do not know لا أعلم	Yes نعم	No لا	No لا	No لا	Yes نعم
Agree أوافق	Male ذكر	20	Saudi سعودي	جامعة شقراء كلية الطب	Medicine الطب	2nd year السنة الثانية	>4.5	It is simulating human attitudes and abilities using computers and technology by teaching machines how humans think, behave, and react toward different situations. هو سلوك وخصائص معينة تتسم بها البرامج الحاسوبية، تجعلها تحاكي القدرات الذهنية البشرية وأنماط عملها.	Broadcast Media (TV, Radio). وسائل الإعلام المرئية (تلفزيون ، راديو), Outdoor Media (e.g.Billboards, Transit Ads,..). وسائل الإعلام الخارجية (مثل اللوحات الإعلانية والجدارية،..), Social Media (Facebook, Instagram, Snapchat, Tweeter,…). وسائل التواصل الاجتماعي, Internet (web pages, online databases,...). الإنترنت (صفحات الويب، قواعد البيانات، ...), Video games. ألعاب الفيديو, Family members. أفراد…	No لا	Yes نعم	Yes نعم	Yes نعم	Do not know لا أعلم	Do not know لا أعلم	Yes نعم	No لا	Yes نعم	Yes نعم	Yes نعم	Do not know لا أعلم	Yes نعم
Agree أوافق	Female أنثى	19	Non-Saudi غير سعودي	Batterjee Medical College, Jeddah. كلية البترجي الطبية، جدة	Medicine الطب	1st year السنة الأولى	>4.5	It is simulating human attitudes and abilities using computers and technology by teaching machines how humans think, behave, and react toward different situations. هو سلوك وخصائص معينة تتسم بها البرامج الحاسوبية، تجعلها تحاكي القدرات الذهنية البشرية وأنماط عملها.	Social Media (Facebook, Instagram, Snapchat, Tweeter,…). وسائل التواصل الاجتماعي, Internet (web pages, online databases,...). الإنترنت (صفحات الويب، قواعد البيانات، ...)	No لا	Yes نعم	Yes نعم	Yes نعم	Yes نعم	Do not know لا أعلم	Yes نعم	Yes نعم	Yes نعم	No لا	Do not know لا أعلم	No لا	Do not know لا أعلم
Agree أوافق	Female أنثى	20	Saudi سعودي	Batterjee Medical College, Jeddah. كلية البترجي الطبية، جدة	Medicine الطب	1st year السنة الأولى	>4.5	It is simulating human attitudes and abilities using computers and technology by teaching machines how humans think, behave, and react toward different situations. هو سلوك وخصائص معينة تتسم بها البرامج الحاسوبية، تجعلها تحاكي القدرات الذهنية البشرية وأنماط عملها.	Academic courses المناهج الدراسية, Broadcast Media (TV, Radio). وسائل الإعلام المرئية (تلفزيون ، راديو), Social Media (Facebook, Instagram, Snapchat, Tweeter,…). وسائل التواصل الاجتماعي, Friends. أصدقاء	No لا	Yes نعم	Yes نعم	Yes نعم	Yes نعم	Yes نعم	Yes نعم	No لا	Yes نعم	No لا	No لا	Yes نعم	No لا
Agree أوافق	Female أنثى	20	Saudi سعودي	Batterjee Medical College, Jeddah. كلية البترجي الطبية، جدة	Respiratory Therapy العلاج التنفسي	2nd year السنة الثانية	≤3.5	It is simulating human attitudes and abilities using computers and technology by teaching machines how humans think, behave, and react toward different situations. هو سلوك وخصائص معينة تتسم بها البرامج الحاسوبية، تجعلها تحاكي القدرات الذهنية البشرية وأنماط عملها.	Broadcast Media (TV, Radio). وسائل الإعلام المرئية (تلفزيون ، راديو)	No لا	Yes نعم	Yes نعم	Do not know لا أعلم	No لا	Do not know لا أعلم	Do not know لا أعلم	No لا	Do not know لا أعلم	Do not know لا أعلم	Yes نعم	Do not know لا أعلم	Yes نعم
Agree أوافق	Female أنثى	21	Saudi سعودي	Batterjee Medical College, Jeddah. كلية البترجي الطبية، جدة	Respiratory Therapy العلاج التنفسي	2nd year السنة الثانية	≤3.5	It is simulating human attitudes and abilities using computers and technology by teaching machines how humans think, behave, and react toward different situations. هو سلوك وخصائص معينة تتسم بها البرامج الحاسوبية، تجعلها تحاكي القدرات الذهنية البشرية وأنماط عملها.	Print Media (books, magazines, newspapers). وسائل الإعلام المطبوعة (كتب، مجلات، صحف)., Broadcast Media (TV, Radio). وسائل الإعلام المرئية (تلفزيون ، راديو)	No لا	Yes نعم	Yes نعم	Yes نعم	Yes نعم	Yes نعم	Do not know لا أعلم	No لا	No لا	No لا	Yes نعم	No لا	No لا
Agree أوافق	Female أنثى	21	Saudi سعودي	Batterjee Medical College, Jeddah. كلية البترجي الطبية، جدة	Respiratory Therapy العلاج التنفسي	2nd year السنة الثانية	3.5-4	It is simulating human attitudes and abilities using computers and technology by teaching machines how humans think, behave, and react toward different situations. هو سلوك وخصائص معينة تتسم بها البرامج الحاسوبية، تجعلها تحاكي القدرات الذهنية البشرية وأنماط عملها.	Social Media (Facebook, Instagram, Snapchat, Tweeter,…). وسائل التواصل الاجتماعي	No لا	No لا	Yes نعم	No لا	Do not know لا أعلم	Yes نعم	No لا	No لا	No لا	No لا	Do not know لا أعلم	Do not know لا أعلم	Do not know لا أعلم
Agree أوافق	Male ذكر	20	Saudi سعودي	جامعة شقراء	Medicine الطب	2nd year السنة الثانية	3.5-4	It is simulating human attitudes and abilities using computers and technology by teaching machines how humans think, behave, and react toward different situations. هو سلوك وخصائص معينة تتسم بها البرامج الحاسوبية، تجعلها تحاكي القدرات الذهنية البشرية وأنماط عملها.	Academic courses المناهج الدراسية, Print Media (books, magazines, newspapers). وسائل الإعلام المطبوعة (كتب، مجلات، صحف)., Broadcast Media (TV, Radio). وسائل الإعلام المرئية (تلفزيون ، راديو), Outdoor Media (e.g.Billboards, Transit Ads,..). وسائل الإعلام الخارجية (مثل اللوحات الإعلانية والجدارية،..), Social Media (Facebook, Instagram, Snapchat, Tweeter,…). وسائل التواصل الاجتماعي, Internet (web pa…	No لا	Yes نعم	Yes نعم	Yes نعم	Yes نعم	Do not know لا أعلم	Yes نعم	Yes نعم	Yes نعم	No لا	Do not know لا أعلم	Do not know لا أعلم	Do not know لا أعلم
Agree أوافق	Female أنثى	18	Saudi سعودي	Batterjee Medical College, Jeddah. كلية البترجي الطبية، جدة	Preparatory Year السنة التحضيرية	Preparatory Year السنة التحضيرية	3.5-4	It is simulating human attitudes and abilities using computers and technology by teaching machines how humans think, behave, and react toward different situations. هو سلوك وخصائص معينة تتسم بها البرامج الحاسوبية، تجعلها تحاكي القدرات الذهنية البشرية وأنماط عملها.	Academic courses المناهج الدراسية	No لا	Yes نعم	Yes نعم	Yes نعم	Yes نعم	Do not know لا أعلم	Yes نعم	No لا	No لا	Do not know لا أعلم	Yes نعم	Yes نعم	Yes نعم
Agree أوافق	Female أنثى	19	Saudi سعودي	Batterjee Medical College, Jeddah. كلية البترجي الطبية، جدة	Medicine الطب	1st year السنة الأولى	>4.5	It is simulating human attitudes and abilities using computers and technology by teaching machines how humans think, behave, and react toward different situations. هو سلوك وخصائص معينة تتسم بها البرامج الحاسوبية، تجعلها تحاكي القدرات الذهنية البشرية وأنماط عملها.	Broadcast Media (TV, Radio). وسائل الإعلام المرئية (تلفزيون ، راديو), Social Media (Facebook, Instagram, Snapchat, Tweeter,…). وسائل التواصل الاجتماعي, Internet (web pages, online databases,...). الإنترنت (صفحات الويب، قواعد البيانات، ...), Video games. ألعاب الفيديو	No لا	No لا	No لا	No لا	Yes نعم	No لا	No لا	No لا	No لا	Yes نعم	No لا	Yes نعم	Yes نعم
Agree أوافق	Female أنثى	21	Saudi سعودي	Batterjee Medical College, Jeddah. كلية البترجي الطبية، جدة	Respiratory Therapy العلاج التنفسي	2nd year السنة الثانية	3.5-4	It is simulating human attitudes and abilities using computers and technology by teaching machines how humans think, behave, and react toward different situations. هو سلوك وخصائص معينة تتسم بها البرامج الحاسوبية، تجعلها تحاكي القدرات الذهنية البشرية وأنماط عملها.	Social Media (Facebook, Instagram, Snapchat, Tweeter,…). وسائل التواصل الاجتماعي	No لا	Yes نعم	Yes نعم	Yes نعم	Yes نعم	No لا	Yes نعم	Yes نعم	Yes نعم	Yes نعم	No لا	No لا	Yes نعم
Agree أوافق	Female أنثى	19	Saudi سعودي	جامعه شقراء - Shaqra University	Nursing التمريض	1st year السنة الأولى	≤3.5	It is simulating human attitudes and abilities using computers and technology by teaching machines how humans think, behave, and react toward different situations. هو سلوك وخصائص معينة تتسم بها البرامج الحاسوبية، تجعلها تحاكي القدرات الذهنية البشرية وأنماط عملها.	Broadcast Media (TV, Radio). وسائل الإعلام المرئية (تلفزيون ، راديو), Social Media (Facebook, Instagram, Snapchat, Tweeter,…). وسائل التواصل الاجتماعي	Yes- as a personal effort. نعم كرغبة شخصية	Yes نعم	Yes نعم	Yes نعم	Yes نعم	Do not know لا أعلم	Yes نعم	Yes نعم	Yes نعم	Yes نعم	Yes نعم	Yes نعم	Do not know لا أعلم
Agree أوافق	Female أنثى	20	Saudi سعودي	Batterjee Medical College, Jeddah. كلية البترجي الطبية، جدة	Medicine الطب	1st year السنة الأولى	>4.5	It is simulating human attitudes and abilities using computers and technology by teaching machines how humans think, behave, and react toward different situations. هو سلوك وخصائص معينة تتسم بها البرامج الحاسوبية، تجعلها تحاكي القدرات الذهنية البشرية وأنماط عملها.	Social Media (Facebook, Instagram, Snapchat, Tweeter,…). وسائل التواصل الاجتماعي, Internet (web pages, online databases,...). الإنترنت (صفحات الويب، قواعد البيانات، ...)	No لا	Yes نعم	Yes نعم	Yes نعم	Yes نعم	No لا	Yes نعم	Yes نعم	Yes نعم	No لا	No لا	No لا	No لا
Agree أوافق	Female أنثى	19	Saudi سعودي	King Abdulaziz University, Jeddah. جامعة الملك عبد العزيز، جدة	Medicine الطب	2nd year السنة الثانية	>4.5	It is simulating human attitudes and abilities using computers and technology by teaching machines how humans think, behave, and react toward different situations. هو سلوك وخصائص معينة تتسم بها البرامج الحاسوبية، تجعلها تحاكي القدرات الذهنية البشرية وأنماط عملها.	Academic courses المناهج الدراسية, Social Media (Facebook, Instagram, Snapchat, Tweeter,…). وسائل التواصل الاجتماعي, Internet (web pages, online databases,...). الإنترنت (صفحات الويب، قواعد البيانات، ...), Video games. ألعاب الفيديو, Family members. أفراد الأسرة, Friends. أصدقاء	Yes- as a part of university curriculum. نعم كمنهج دراسي في الجامعة	Yes نعم	Yes نعم	Yes نعم	Yes نعم	No لا	Yes نعم	No لا	Yes نعم	Yes نعم	No لا	No لا	Yes نعم
Agree أوافق	Female أنثى	21	Saudi سعودي	King Saud University, Riyadh. جامعة الملك سعود، الرياض	Medicine الطب	3rd year السنة الثالثة	>4.5	It is simulating human attitudes and abilities using computers and technology by teaching machines how humans think, behave, and react toward different situations. هو سلوك وخصائص معينة تتسم بها البرامج الحاسوبية، تجعلها تحاكي القدرات الذهنية البشرية وأنماط عملها.	Broadcast Media (TV, Radio). وسائل الإعلام المرئية (تلفزيون ، راديو), Outdoor Media (e.g.Billboards, Transit Ads,..). وسائل الإعلام الخارجية (مثل اللوحات الإعلانية والجدارية،..), Social Media (Facebook, Instagram, Snapchat, Tweeter,…). وسائل التواصل الاجتماعي	Yes- as a personal effort. نعم كرغبة شخصية	Yes نعم	Yes نعم	Yes نعم	Do not know لا أعلم	Yes نعم	Yes نعم	Yes نعم	Yes نعم	No لا	Do not know لا أعلم	Yes نعم	Yes نعم
Agree أوافق	Female أنثى	18	Non-Saudi غير سعودي	Batterjee Medical College, Jeddah. كلية البترجي الطبية، جدة	Medicine الطب	1st year السنة الأولى	>4.5	It is simulating human attitudes and abilities using computers and technology by teaching machines how humans think, behave, and react toward different situations. هو سلوك وخصائص معينة تتسم بها البرامج الحاسوبية، تجعلها تحاكي القدرات الذهنية البشرية وأنماط عملها.	Broadcast Media (TV, Radio). وسائل الإعلام المرئية (تلفزيون ، راديو), Social Media (Facebook, Instagram, Snapchat, Tweeter,…). وسائل التواصل الاجتماعي, Internet (web pages, online databases,...). الإنترنت (صفحات الويب، قواعد البيانات، ...)	No لا	Yes نعم	Do not know لا أعلم	Yes نعم	Yes نعم	Yes نعم	Yes نعم	No لا	Yes نعم	Do not know لا أعلم	No لا	No لا	No لا
Agree أوافق	Male ذكر	19	Saudi سعودي	جامعة شقراء	Preparatory Year السنة التحضيرية	Preparatory Year السنة التحضيرية	>4.5	It is simulating human attitudes and abilities using computers and technology by teaching machines how humans think, behave, and react toward different situations. هو سلوك وخصائص معينة تتسم بها البرامج الحاسوبية، تجعلها تحاكي القدرات الذهنية البشرية وأنماط عملها.	Print Media (books, magazines, newspapers). وسائل الإعلام المطبوعة (كتب، مجلات، صحف)., Family members. أفراد الأسرة	Yes- as a personal effort. نعم كرغبة شخصية	Yes نعم	No لا	No لا	No لا	No لا	No لا	Do not know لا أعلم	Do not know لا أعلم	No لا	Yes نعم	Yes نعم	No لا
Agree أوافق	Female أنثى	18	Saudi سعودي	جامعة شقراء	Pharmacy الصيدلة	Preparatory Year السنة التحضيرية	≤3.5	It is simulating human attitudes and abilities using computers and technology by teaching machines how humans think, behave, and react toward different situations. هو سلوك وخصائص معينة تتسم بها البرامج الحاسوبية، تجعلها تحاكي القدرات الذهنية البشرية وأنماط عملها.	Academic courses المناهج الدراسية, Print Media (books, magazines, newspapers). وسائل الإعلام المطبوعة (كتب، مجلات، صحف).	No لا	Yes نعم	No لا	Do not know لا أعلم	Do not know لا أعلم	Do not know لا أعلم	Do not know لا أعلم	Do not know لا أعلم	Do not know لا أعلم	Do not know لا أعلم	Yes نعم	Do not know لا أعلم	Do not know لا أعلم
Agree أوافق	Male ذكر	19	Saudi سعودي	جامعة شقراء	Medicine الطب	Preparatory Year السنة التحضيرية	>4.5	It is simulating human attitudes and abilities using computers and technology by teaching machines how humans think, behave, and react toward different situations. هو سلوك وخصائص معينة تتسم بها البرامج الحاسوبية، تجعلها تحاكي القدرات الذهنية البشرية وأنماط عملها.	Academic courses المناهج الدراسية, Broadcast Media (TV, Radio). وسائل الإعلام المرئية (تلفزيون ، راديو), Social Media (Facebook, Instagram, Snapchat, Tweeter,…). وسائل التواصل الاجتماعي, Internet (web pages, online databases,...). الإنترنت (صفحات الويب، قواعد البيانات، ...), Family members. أفراد الأسرة, Friends. أصدقاء	No لا	Yes نعم	Yes نعم	Yes نعم	Yes نعم	Yes نعم	Yes نعم	Yes نعم	Yes نعم	Do not know لا أعلم	Do not know لا أعلم	No لا	Do not know لا أعلم
Agree أوافق	Female أنثى	23	Saudi سعودي	Batterjee Medical College, Jeddah. كلية البترجي الطبية، جدة	Medicine الطب	4th year السنة الرابعة	≤3.5	It is simulating human attitudes and abilities using computers and technology by teaching machines how humans think, behave, and react toward different situations. هو سلوك وخصائص معينة تتسم بها البرامج الحاسوبية، تجعلها تحاكي القدرات الذهنية البشرية وأنماط عملها.	Print Media (books, magazines, newspapers). وسائل الإعلام المطبوعة (كتب، مجلات، صحف).	Yes- as a personal effort. نعم كرغبة شخصية	No لا	Do not know لا أعلم	Do not know لا أعلم	Do not know لا أعلم	Do not know لا أعلم	Do not know لا أعلم	Do not know لا أعلم	Do not know لا أعلم	Yes نعم	Do not know لا أعلم	Do not know لا أعلم	Do not know لا أعلم
Agree أوافق	Female أنثى	21	Non-Saudi غير سعودي	Batterjee Medical College, Jeddah. كلية البترجي الطبية، جدة	Medicine الطب	4th year السنة الرابعة	>4.5	It is simulating human attitudes and abilities using computers and technology by teaching machines how humans think, behave, and react toward different situations. هو سلوك وخصائص معينة تتسم بها البرامج الحاسوبية، تجعلها تحاكي القدرات الذهنية البشرية وأنماط عملها.	Academic courses المناهج الدراسية, Print Media (books, magazines, newspapers). وسائل الإعلام المطبوعة (كتب، مجلات، صحف)., Broadcast Media (TV, Radio). وسائل الإعلام المرئية (تلفزيون ، راديو), Outdoor Media (e.g.Billboards, Transit Ads,..). وسائل الإعلام الخارجية (مثل اللوحات الإعلانية والجدارية،..), Social Media (Facebook, Instagram, Snapchat, Tweeter,…). وسائل التواصل الاجتماعي, Internet (web pa…	Yes- as a personal effort. نعم كرغبة شخصية	Yes نعم	Yes نعم	Yes نعم	Yes نعم	Yes نعم	Yes نعم	No لا	Yes نعم	Yes نعم	Yes نعم	Yes نعم	Yes نعم
Agree أوافق	Female أنثى	21	Non-Saudi غير سعودي	Batterjee Medical College, Jeddah. كلية البترجي الطبية، جدة	Medicine الطب	3rd year السنة الثالثة	≤3.5	It is simulating human attitudes and abilities using computers and technology by teaching machines how humans think, behave, and react toward different situations. هو سلوك وخصائص معينة تتسم بها البرامج الحاسوبية، تجعلها تحاكي القدرات الذهنية البشرية وأنماط عملها.	Social Media (Facebook, Instagram, Snapchat, Tweeter,…). وسائل التواصل الاجتماعي, Internet (web pages, online databases,...). الإنترنت (صفحات الويب، قواعد البيانات، ...)	No لا	Yes نعم	Yes نعم	Yes نعم	Do not know لا أعلم	Do not know لا أعلم	Yes نعم	No لا	Yes نعم	No لا	Yes نعم	No لا	Yes نعم
Agree أوافق	Female أنثى	20	Saudi سعودي	Batterjee Medical College, Jeddah. كلية البترجي الطبية، جدة	Nursing التمريض	3rd year السنة الثالثة	3.5-4	It is simulating human attitudes and abilities using computers and technology by teaching machines how humans think, behave, and react toward different situations. هو سلوك وخصائص معينة تتسم بها البرامج الحاسوبية، تجعلها تحاكي القدرات الذهنية البشرية وأنماط عملها.	Social Media (Facebook, Instagram, Snapchat, Tweeter,…). وسائل التواصل الاجتماعي, Internet (web pages, online databases,...). الإنترنت (صفحات الويب، قواعد البيانات، ...), Video games. ألعاب الفيديو	No لا	Yes نعم	Yes نعم	Yes نعم	Yes نعم	Yes نعم	Yes نعم	No لا	Yes نعم	No لا	Do not know لا أعلم	Yes نعم	Yes نعم
Agree أوافق	Female أنثى	20	Saudi سعودي	Batterjee Medical College, Jeddah. كلية البترجي الطبية، جدة	Nursing التمريض	3rd year السنة الثالثة	4-4.5	It is simulating human attitudes and abilities using computers and technology by teaching machines how humans think, behave, and react toward different situations. هو سلوك وخصائص معينة تتسم بها البرامج الحاسوبية، تجعلها تحاكي القدرات الذهنية البشرية وأنماط عملها.	Social Media (Facebook, Instagram, Snapchat, Tweeter,…). وسائل التواصل الاجتماعي, Internet (web pages, online databases,...). الإنترنت (صفحات الويب، قواعد البيانات، ...), Family members. أفراد الأسرة	No لا	Yes نعم	Do not know لا أعلم	Yes نعم	Yes نعم	Yes نعم	Yes نعم	No لا	No لا	No لا	Yes نعم	Yes نعم	Yes نعم
Agree أوافق	Male ذكر	19	Non-Saudi غير سعودي	Batterjee Medical College, Jeddah. كلية البترجي الطبية، جدة	Medicine الطب	2nd year السنة الثانية	4-4.5	It is simulating human attitudes and abilities using computers and technology by teaching machines how humans think, behave, and react toward different situations. هو سلوك وخصائص معينة تتسم بها البرامج الحاسوبية، تجعلها تحاكي القدرات الذهنية البشرية وأنماط عملها.	Social Media (Facebook, Instagram, Snapchat, Tweeter,…). وسائل التواصل الاجتماعي, Internet (web pages, online databases,...). الإنترنت (صفحات الويب، قواعد البيانات، ...), Video games. ألعاب الفيديو	No لا	Yes نعم	Do not know لا أعلم	Yes نعم	Yes نعم	Do not know لا أعلم	Do not know لا أعلم	Yes نعم	Yes نعم	No لا	No لا	Yes نعم	No لا
Agree أوافق	Male ذكر	22	Saudi سعودي	Batterjee Medical College, Jeddah. كلية البترجي الطبية، جدة	Medicine الطب	2nd year السنة الثانية	4-4.5	It is simulating human attitudes and abilities using computers and technology by teaching machines how humans think, behave, and react toward different situations. هو سلوك وخصائص معينة تتسم بها البرامج الحاسوبية، تجعلها تحاكي القدرات الذهنية البشرية وأنماط عملها.	Broadcast Media (TV, Radio). وسائل الإعلام المرئية (تلفزيون ، راديو), Social Media (Facebook, Instagram, Snapchat, Tweeter,…). وسائل التواصل الاجتماعي, Video games. ألعاب الفيديو, Friends. أصدقاء	No لا	Yes نعم	Yes نعم	Yes نعم	Do not know لا أعلم	Yes نعم	Yes نعم	Do not know لا أعلم	Do not know لا أعلم	Do not know لا أعلم	No لا	Do not know لا أعلم	Yes نعم
Agree أوافق	Female أنثى	21	Non-Saudi غير سعودي	Batterjee Medical College, Jeddah. كلية البترجي الطبية، جدة	Medicine الطب	2nd year السنة الثانية	4-4.5	It is simulating human attitudes and abilities using computers and technology by teaching machines how humans think, behave, and react toward different situations. هو سلوك وخصائص معينة تتسم بها البرامج الحاسوبية، تجعلها تحاكي القدرات الذهنية البشرية وأنماط عملها.	Internet (web pages, online databases,...). الإنترنت (صفحات الويب، قواعد البيانات، ...)	No لا	Yes نعم	Yes نعم	Yes نعم	No لا	Yes نعم	Yes نعم	Yes نعم	Yes نعم	No لا	Yes نعم	No لا	Yes نعم
Agree أوافق	Female أنثى	21	Saudi سعودي	Umm Al Qura University, Makkah. جامعة أم القرى، مكة	Medicine الطب	3rd year السنة الثالثة	4-4.5	It is simulating human attitudes and abilities using computers and technology by teaching machines how humans think, behave, and react toward different situations. هو سلوك وخصائص معينة تتسم بها البرامج الحاسوبية، تجعلها تحاكي القدرات الذهنية البشرية وأنماط عملها.	Academic courses المناهج الدراسية, Print Media (books, magazines, newspapers). وسائل الإعلام المطبوعة (كتب، مجلات، صحف)., Outdoor Media (e.g.Billboards, Transit Ads,..). وسائل الإعلام الخارجية (مثل اللوحات الإعلانية والجدارية،..), Social Media (Facebook, Instagram, Snapchat, Tweeter,…). وسائل التواصل الاجتماعي, Internet (web pages, online databases,...). الإنترنت (صفحات الويب، قواعد البيانات، ...…	No لا	Yes نعم	Yes نعم	Yes نعم	Yes نعم	Yes نعم	Yes نعم	No لا	Yes نعم	No لا	No لا	No لا	No لا
Agree أوافق	Female أنثى	19	Saudi سعودي	Umm Al Qura University, Makkah. جامعة أم القرى، مكة	Medicine الطب	3rd year السنة الثالثة	≤3.5	It is simulating human attitudes and abilities using computers and technology by teaching machines how humans think, behave, and react toward different situations. هو سلوك وخصائص معينة تتسم بها البرامج الحاسوبية، تجعلها تحاكي القدرات الذهنية البشرية وأنماط عملها.	Social Media (Facebook, Instagram, Snapchat, Tweeter,…). وسائل التواصل الاجتماعي	No لا	Yes نعم	Do not know لا أعلم	Yes نعم	Yes نعم	No لا	Yes نعم	Yes نعم	Yes نعم	No لا	No لا	No لا	No لا
Agree أوافق	Female أنثى	20	Saudi سعودي	Umm Al Qura University, Makkah. جامعة أم القرى، مكة	Medicine الطب	3rd year السنة الثالثة	4-4.5	It is simulating human attitudes and abilities using computers and technology by teaching machines how humans think, behave, and react toward different situations. هو سلوك وخصائص معينة تتسم بها البرامج الحاسوبية، تجعلها تحاكي القدرات الذهنية البشرية وأنماط عملها.	Academic courses المناهج الدراسية, Print Media (books, magazines, newspapers). وسائل الإعلام المطبوعة (كتب، مجلات، صحف)., Social Media (Facebook, Instagram, Snapchat, Tweeter,…). وسائل التواصل الاجتماعي, Internet (web pages, online databases,...). الإنترنت (صفحات الويب، قواعد البيانات، ...), Family members. أفراد الأسرة	No لا	Yes نعم	Do not know لا أعلم	Do not know لا أعلم	Do not know لا أعلم	No لا	Do not know لا أعلم	No لا	Do not know لا أعلم	Yes نعم	Do not know لا أعلم	Do not know لا أعلم	Yes نعم
Agree أوافق	Female أنثى	20	Saudi سعودي	Umm Al Qura University, Makkah. جامعة أم القرى، مكة	Medicine الطب	3rd year السنة الثالثة	>4.5	It is simulating human attitudes and abilities using computers and technology by teaching machines how humans think, behave, and react toward different situations. هو سلوك وخصائص معينة تتسم بها البرامج الحاسوبية، تجعلها تحاكي القدرات الذهنية البشرية وأنماط عملها.	Academic courses المناهج الدراسية, Print Media (books, magazines, newspapers). وسائل الإعلام المطبوعة (كتب، مجلات، صحف)., Social Media (Facebook, Instagram, Snapchat, Tweeter,…). وسائل التواصل الاجتماعي	No لا	Do not know لا أعلم	Yes نعم	Yes نعم	No لا	Yes نعم	Yes نعم	Yes نعم	Yes نعم	Do not know لا أعلم	Do not know لا أعلم	Do not know لا أعلم	Do not know لا أعلم
Agree أوافق	Female أنثى	20	Saudi سعودي	Umm Al Qura University, Makkah. جامعة أم القرى، مكة	Medicine الطب	4th year السنة الرابعة	3.5-4	It is simulating human attitudes and abilities using computers and technology by teaching machines how humans think, behave, and react toward different situations. هو سلوك وخصائص معينة تتسم بها البرامج الحاسوبية، تجعلها تحاكي القدرات الذهنية البشرية وأنماط عملها.	Broadcast Media (TV, Radio). وسائل الإعلام المرئية (تلفزيون ، راديو), Social Media (Facebook, Instagram, Snapchat, Tweeter,…). وسائل التواصل الاجتماعي, Internet (web pages, online databases,...). الإنترنت (صفحات الويب، قواعد البيانات، ...), Friends. أصدقاء	No لا	Yes نعم	Yes نعم	Do not know لا أعلم	Yes نعم	Yes نعم	Yes نعم	No لا	Do not know لا أعلم	No لا	Do not know لا أعلم	Do not know لا أعلم	Do not know لا أعلم
Agree أوافق	Female أنثى	22	Saudi سعودي	فيصل احساء .	Medicine الطب	3rd year السنة الثالثة	3.5-4	It is a type of medical drug used to improve intelligence, but it causes side effects such as skin rashes. هو نوع من الأدوية الطبية يستخدم لتحسين الذكاء ، لكنه يسبب آثارًا جانبية مثل الطفح الجلدي	Academic courses المناهج الدراسية	No لا	Do not know لا أعلم	Do not know لا أعلم	Do not know لا أعلم	Do not know لا أعلم	Do not know لا أعلم	Do not know لا أعلم	Do not know لا أعلم	Do not know لا أعلم	Do not know لا أعلم	Do not know لا أعلم	Do not know لا أعلم	Do not know لا أعلم
Agree أوافق	Male ذكر	23	Saudi سعودي	جامعة الباحة	Medicine الطب	5th year السنة الخامسة	>4.5	It is simulating human attitudes and abilities using computers and technology by teaching machines how humans think, behave, and react toward different situations. هو سلوك وخصائص معينة تتسم بها البرامج الحاسوبية، تجعلها تحاكي القدرات الذهنية البشرية وأنماط عملها.	Academic courses المناهج الدراسية, Print Media (books, magazines, newspapers). وسائل الإعلام المطبوعة (كتب، مجلات، صحف)., Broadcast Media (TV, Radio). وسائل الإعلام المرئية (تلفزيون ، راديو), Outdoor Media (e.g.Billboards, Transit Ads,..). وسائل الإعلام الخارجية (مثل اللوحات الإعلانية والجدارية،..), Social Media (Facebook, Instagram, Snapchat, Tweeter,…). وسائل التواصل الاجتماعي, Internet (web pa…	No لا	Yes نعم	Do not know لا أعلم	Yes نعم	No لا	No لا	Yes نعم	Yes نعم	Yes نعم	No لا	Yes نعم	Yes نعم	Yes نعم
Agree أوافق	Male ذكر	21	Saudi سعودي	Jeddah Unoversity, Jeddah. جامعة جدة، جدة	Medicine الطب	4th year السنة الرابعة	>4.5	It is simulating human attitudes and abilities using computers and technology by teaching machines how humans think, behave, and react toward different situations. هو سلوك وخصائص معينة تتسم بها البرامج الحاسوبية، تجعلها تحاكي القدرات الذهنية البشرية وأنماط عملها.	Print Media (books, magazines, newspapers). وسائل الإعلام المطبوعة (كتب، مجلات، صحف)., Broadcast Media (TV, Radio). وسائل الإعلام المرئية (تلفزيون ، راديو), Outdoor Media (e.g.Billboards, Transit Ads,..). وسائل الإعلام الخارجية (مثل اللوحات الإعلانية والجدارية،..), Social Media (Facebook, Instagram, Snapchat, Tweeter,…). وسائل التواصل الاجتماعي, Internet (web pages, online databases,...). الإنترن…	No لا	Yes نعم	Yes نعم	Yes نعم	No لا	Yes نعم	Yes نعم	Yes نعم	Yes نعم	Yes نعم	Yes نعم	No لا	Yes نعم
Agree أوافق	Female أنثى	21	Saudi سعودي	Jeddah Unoversity, Jeddah. جامعة جدة، جدة	Medicine الطب	4th year السنة الرابعة	4-4.5	It is simulating human attitudes and abilities using computers and technology by teaching machines how humans think, behave, and react toward different situations. هو سلوك وخصائص معينة تتسم بها البرامج الحاسوبية، تجعلها تحاكي القدرات الذهنية البشرية وأنماط عملها.	Academic courses المناهج الدراسية, Print Media (books, magazines, newspapers). وسائل الإعلام المطبوعة (كتب، مجلات، صحف)., Broadcast Media (TV, Radio). وسائل الإعلام المرئية (تلفزيون ، راديو), Outdoor Media (e.g.Billboards, Transit Ads,..). وسائل الإعلام الخارجية (مثل اللوحات الإعلانية والجدارية،..), Social Media (Facebook, Instagram, Snapchat, Tweeter,…). وسائل التواصل الاجتماعي, Internet (web pa…	No لا	Yes نعم	Yes نعم	Yes نعم	Do not know لا أعلم	Yes نعم	Yes نعم	No لا	No لا	Do not know لا أعلم	Do not know لا أعلم	Do not know لا أعلم	Do not know لا أعلم
Agree أوافق	Female أنثى	20	Saudi سعودي	Batterjee Medical College, Jeddah. كلية البترجي الطبية، جدة	Respiratory Therapy العلاج التنفسي	2nd year السنة الثانية	4-4.5	It is simulating human attitudes and abilities using computers and technology by teaching machines how humans think, behave, and react toward different situations. هو سلوك وخصائص معينة تتسم بها البرامج الحاسوبية، تجعلها تحاكي القدرات الذهنية البشرية وأنماط عملها.	Broadcast Media (TV, Radio). وسائل الإعلام المرئية (تلفزيون ، راديو)	Yes- as a personal effort. نعم كرغبة شخصية	Yes نعم	Yes نعم	Yes نعم	Yes نعم	Yes نعم	Yes نعم	Yes نعم	Yes نعم	Yes نعم	Yes نعم	Yes نعم	Yes نعم
Agree أوافق	Female أنثى	21	Saudi سعودي	Jeddah Unoversity, Jeddah. جامعة جدة، جدة	Medicine الطب	4th year السنة الرابعة	>4.5	It is simulating human attitudes and abilities using computers and technology by teaching machines how humans think, behave, and react toward different situations. هو سلوك وخصائص معينة تتسم بها البرامج الحاسوبية، تجعلها تحاكي القدرات الذهنية البشرية وأنماط عملها.	Print Media (books, magazines, newspapers). وسائل الإعلام المطبوعة (كتب، مجلات، صحف)., Social Media (Facebook, Instagram, Snapchat, Tweeter,…). وسائل التواصل الاجتماعي, Internet (web pages, online databases,...). الإنترنت (صفحات الويب، قواعد البيانات، ...), Family members. أفراد الأسرة, Friends. أصدقاء	Yes- as a personal effort. نعم كرغبة شخصية	Yes نعم	Yes نعم	Yes نعم	No لا	Yes نعم	Yes نعم	Yes نعم	Yes نعم	Yes نعم	No لا	No لا	Yes نعم
Agree أوافق	Female أنثى	21	Saudi سعودي	Jeddah Unoversity, Jeddah. جامعة جدة، جدة	Medicine الطب	4th year السنة الرابعة	>4.5	It is simulating human attitudes and abilities using computers and technology by teaching machines how humans think, behave, and react toward different situations. هو سلوك وخصائص معينة تتسم بها البرامج الحاسوبية، تجعلها تحاكي القدرات الذهنية البشرية وأنماط عملها.	Print Media (books, magazines, newspapers). وسائل الإعلام المطبوعة (كتب، مجلات، صحف)., Friends. أصدقاء	No لا	Yes نعم	Yes نعم	Yes نعم	No لا	Yes نعم	Yes نعم	Yes نعم	Yes نعم	Do not know لا أعلم	Do not know لا أعلم	Do not know لا أعلم	Do not know لا أعلم
Agree أوافق	Female أنثى	18	Saudi سعودي	جامعة المجمعة	مختبرات طبية	1st year السنة الأولى	3.5-4	It is simulating human attitudes and abilities using computers and technology by teaching machines how humans think, behave, and react toward different situations. هو سلوك وخصائص معينة تتسم بها البرامج الحاسوبية، تجعلها تحاكي القدرات الذهنية البشرية وأنماط عملها.	Social Media (Facebook, Instagram, Snapchat, Tweeter,…). وسائل التواصل الاجتماعي, Internet (web pages, online databases,...). الإنترنت (صفحات الويب، قواعد البيانات، ...), Video games. ألعاب الفيديو, Family members. أفراد الأسرة	Yes- as a personal effort. نعم كرغبة شخصية	Yes نعم	Yes نعم	Yes نعم	Yes نعم	No لا	Do not know لا أعلم	No لا	No لا	Yes نعم	No لا	No لا	Yes نعم
Agree أوافق	Female أنثى	20	Saudi سعودي	جامعة المجمعه	مختبرات طبية medical laboratory science	1st year السنة الأولى	3.5-4	It is simulating human attitudes and abilities using computers and technology by teaching machines how humans think, behave, and react toward different situations. هو سلوك وخصائص معينة تتسم بها البرامج الحاسوبية، تجعلها تحاكي القدرات الذهنية البشرية وأنماط عملها.	Social Media (Facebook, Instagram, Snapchat, Tweeter,…). وسائل التواصل الاجتماعي, Internet (web pages, online databases,...). الإنترنت (صفحات الويب، قواعد البيانات، ...), Family members. أفراد الأسرة, Friends. أصدقاء	No لا	Yes نعم	Yes نعم	Do not know لا أعلم	Yes نعم	Yes نعم	Yes نعم	Yes نعم	Yes نعم	Yes نعم	No لا	Yes نعم	Do not know لا أعلم
Agree أوافق	Male ذكر	22	Saudi سعودي	Jeddah Unoversity, Jeddah. جامعة جدة، جدة	Medicine الطب	4th year السنة الرابعة	>4.5	It is simulating human attitudes and abilities using computers and technology by teaching machines how humans think, behave, and react toward different situations. هو سلوك وخصائص معينة تتسم بها البرامج الحاسوبية، تجعلها تحاكي القدرات الذهنية البشرية وأنماط عملها.	Print Media (books, magazines, newspapers). وسائل الإعلام المطبوعة (كتب، مجلات، صحف).	No لا	Yes نعم	Yes نعم	Do not know لا أعلم	No لا	Yes نعم	No لا	No لا	No لا	Do not know لا أعلم	Yes نعم	Yes نعم	Yes نعم
Agree أوافق	Female أنثى	19	Saudi سعودي	جامعة المجمعة	مختبرات طبية	1st year السنة الأولى	3.5-4	It is simulating human attitudes and abilities using computers and technology by teaching machines how humans think, behave, and react toward different situations. هو سلوك وخصائص معينة تتسم بها البرامج الحاسوبية، تجعلها تحاكي القدرات الذهنية البشرية وأنماط عملها.	Broadcast Media (TV, Radio). وسائل الإعلام المرئية (تلفزيون ، راديو), Social Media (Facebook, Instagram, Snapchat, Tweeter,…). وسائل التواصل الاجتماعي, Internet (web pages, online databases,...). الإنترنت (صفحات الويب، قواعد البيانات، ...), Video games. ألعاب الفيديو	No لا	Yes نعم	Yes نعم	Do not know لا أعلم	Yes نعم	Yes نعم	Yes نعم	Yes نعم	Yes نعم	Do not know لا أعلم	Do not know لا أعلم	Do not know لا أعلم	Yes نعم
Agree أوافق	Male ذكر	20	Saudi سعودي	المجمعة	Medicine الطب	1st year السنة الأولى	>4.5	It is simulating human attitudes and abilities using computers and technology by teaching machines how humans think, behave, and react toward different situations. هو سلوك وخصائص معينة تتسم بها البرامج الحاسوبية، تجعلها تحاكي القدرات الذهنية البشرية وأنماط عملها.	Academic courses المناهج الدراسية	No لا	Yes نعم	No لا	No لا	No لا	Yes نعم	Yes نعم	No لا	No لا	Yes نعم	Yes نعم	Yes نعم	No لا
Agree أوافق	Female أنثى	20	Saudi سعودي	جامعة المجمعة	المختبرات الطبية	1st year السنة الأولى	>4.5	It is simulating human attitudes and abilities using computers and technology by teaching machines how humans think, behave, and react toward different situations. هو سلوك وخصائص معينة تتسم بها البرامج الحاسوبية، تجعلها تحاكي القدرات الذهنية البشرية وأنماط عملها.	Social Media (Facebook, Instagram, Snapchat, Tweeter,…). وسائل التواصل الاجتماعي, Internet (web pages, online databases,...). الإنترنت (صفحات الويب، قواعد البيانات، ...), Friends. أصدقاء	No لا	Yes نعم	Yes نعم	Do not know لا أعلم	Do not know لا أعلم	Do not know لا أعلم	Yes نعم	No لا	Yes نعم	No لا	Yes نعم	No لا	No لا
Agree أوافق	Female أنثى	25	Saudi سعودي	Imam Mohammad Ibn Saud Islamic University, Riyadh. جامعة الإمام محمد بن سعود الإسلامية، الرياض.	Medicine الطب	intern إنترن	3.5-4	It is simulating human attitudes and abilities using computers and technology by teaching machines how humans think, behave, and react toward different situations. هو سلوك وخصائص معينة تتسم بها البرامج الحاسوبية، تجعلها تحاكي القدرات الذهنية البشرية وأنماط عملها.	Broadcast Media (TV, Radio). وسائل الإعلام المرئية (تلفزيون ، راديو), Social Media (Facebook, Instagram, Snapchat, Tweeter,…). وسائل التواصل الاجتماعي, Internet (web pages, online databases,...). الإنترنت (صفحات الويب، قواعد البيانات، ...)	Yes- as a personal effort. نعم كرغبة شخصية	Yes نعم	Yes نعم	Yes نعم	Yes نعم	Yes نعم	Yes نعم	Yes نعم	Yes نعم	Yes نعم	No لا	Yes نعم	Yes نعم
Agree أوافق	Male ذكر	21	Saudi سعودي	Jeddah Unoversity, Jeddah. جامعة جدة، جدة	Medicine الطب	4th year السنة الرابعة	4-4.5	It is simulating human attitudes and abilities using computers and technology by teaching machines how humans think, behave, and react toward different situations. هو سلوك وخصائص معينة تتسم بها البرامج الحاسوبية، تجعلها تحاكي القدرات الذهنية البشرية وأنماط عملها.	Academic courses المناهج الدراسية, Social Media (Facebook, Instagram, Snapchat, Tweeter,…). وسائل التواصل الاجتماعي, Internet (web pages, online databases,...). الإنترنت (صفحات الويب، قواعد البيانات، ...), Video games. ألعاب الفيديو, Family members. أفراد الأسرة, Friends. أصدقاء	No لا	Yes نعم	Yes نعم	Yes نعم	Yes نعم	No لا	Yes نعم	Yes نعم	Yes نعم	Yes نعم	Yes نعم	Yes نعم	Yes نعم
Agree أوافق	Female أنثى	21	Saudi سعودي	Batterjee Medical College, Jeddah. كلية البترجي الطبية، جدة	Medicine الطب	3rd year السنة الثالثة	≤3.5	It is simulating human attitudes and abilities using computers and technology by teaching machines how humans think, behave, and react toward different situations. هو سلوك وخصائص معينة تتسم بها البرامج الحاسوبية، تجعلها تحاكي القدرات الذهنية البشرية وأنماط عملها.	Academic courses المناهج الدراسية, Print Media (books, magazines, newspapers). وسائل الإعلام المطبوعة (كتب، مجلات، صحف)., Broadcast Media (TV, Radio). وسائل الإعلام المرئية (تلفزيون ، راديو), Outdoor Media (e.g.Billboards, Transit Ads,..). وسائل الإعلام الخارجية (مثل اللوحات الإعلانية والجدارية،..), Social Media (Facebook, Instagram, Snapchat, Tweeter,…). وسائل التواصل الاجتماعي, Internet (web pa…	No لا	Yes نعم	Yes نعم	Yes نعم	Yes نعم	Do not know لا أعلم	Yes نعم	Yes نعم	Yes نعم	Yes نعم	Yes نعم	Yes نعم	Yes نعم
Agree أوافق	Female أنثى	21	Saudi سعودي	جامعة المجمعة	مختبرات طبية	4th year السنة الرابعة	4-4.5	It is simulating human attitudes and abilities using computers and technology by teaching machines how humans think, behave, and react toward different situations. هو سلوك وخصائص معينة تتسم بها البرامج الحاسوبية، تجعلها تحاكي القدرات الذهنية البشرية وأنماط عملها.	Social Media (Facebook, Instagram, Snapchat, Tweeter,…). وسائل التواصل الاجتماعي, Internet (web pages, online databases,...). الإنترنت (صفحات الويب، قواعد البيانات، ...)	No لا	Yes نعم	Yes نعم	Yes نعم	No لا	Yes نعم	Yes نعم	No لا	Yes نعم	Yes نعم	Yes نعم	No لا	Yes نعم
Agree أوافق	Female أنثى	21	Saudi سعودي	Jeddah Unoversity, Jeddah. جامعة جدة، جدة	Medicine الطب	4th year السنة الرابعة	3.5-4	It is simulating human attitudes and abilities using computers and technology by teaching machines how humans think, behave, and react toward different situations. هو سلوك وخصائص معينة تتسم بها البرامج الحاسوبية، تجعلها تحاكي القدرات الذهنية البشرية وأنماط عملها.	Academic courses المناهج الدراسية, Social Media (Facebook, Instagram, Snapchat, Tweeter,…). وسائل التواصل الاجتماعي	No لا	Yes نعم	Do not know لا أعلم	Yes نعم	No لا	Yes نعم	Yes نعم	Yes نعم	Yes نعم	No لا	No لا	No لا	No لا
Agree أوافق	Male ذكر	21	Saudi سعودي	Jeddah Unoversity, Jeddah. جامعة جدة، جدة	Medicine الطب	4th year السنة الرابعة	>4.5	It is simulating human attitudes and abilities using computers and technology by teaching machines how humans think, behave, and react toward different situations. هو سلوك وخصائص معينة تتسم بها البرامج الحاسوبية، تجعلها تحاكي القدرات الذهنية البشرية وأنماط عملها.	Print Media (books, magazines, newspapers). وسائل الإعلام المطبوعة (كتب، مجلات، صحف)., Broadcast Media (TV, Radio). وسائل الإعلام المرئية (تلفزيون ، راديو), Social Media (Facebook, Instagram, Snapchat, Tweeter,…). وسائل التواصل الاجتماعي, Internet (web pages, online databases,...). الإنترنت (صفحات الويب، قواعد البيانات، ...), Family members. أفراد الأسرة	No لا	Yes نعم	Yes نعم	Yes نعم	Do not know لا أعلم	Yes نعم	Yes نعم	Do not know لا أعلم	Yes نعم	No لا	Do not know لا أعلم	Yes نعم	Yes نعم
Agree أوافق	Female أنثى	24	Saudi سعودي	جامعة حائل	Radiology الأشعة	خريجه	3.5-4	It is simulating human attitudes and abilities using computers and technology by teaching machines how humans think, behave, and react toward different situations. هو سلوك وخصائص معينة تتسم بها البرامج الحاسوبية، تجعلها تحاكي القدرات الذهنية البشرية وأنماط عملها.	Social Media (Facebook, Instagram, Snapchat, Tweeter,…). وسائل التواصل الاجتماعي, Internet (web pages, online databases,...). الإنترنت (صفحات الويب، قواعد البيانات، ...), Family members. أفراد الأسرة	No لا	Yes نعم	Yes نعم	Yes نعم	Do not know لا أعلم	Yes نعم	Yes نعم	Yes نعم	Yes نعم	No لا	Do not know لا أعلم	Do not know لا أعلم	Do not know لا أعلم
Agree أوافق	Female أنثى	23	Saudi سعودي	Jazan University, Jazan. جامعة جازان، جازان	Medicine الطب	السنة السادسة	>4.5	It is simulating human attitudes and abilities using computers and technology by teaching machines how humans think, behave, and react toward different situations. هو سلوك وخصائص معينة تتسم بها البرامج الحاسوبية، تجعلها تحاكي القدرات الذهنية البشرية وأنماط عملها.	Social Media (Facebook, Instagram, Snapchat, Tweeter,…). وسائل التواصل الاجتماعي, Family members. أفراد الأسرة, Friends. أصدقاء	No لا	Yes نعم	Yes نعم	Yes نعم	Yes نعم	Do not know لا أعلم	Yes نعم	Do not know لا أعلم	Yes نعم	Do not know لا أعلم	No لا	No لا	Yes نعم
Agree أوافق	Female أنثى	18	Saudi سعودي	جامعة حائل	Pharmacy الصيدلة	1st year السنة الأولى	4-4.5	It is simulating human attitudes and abilities using computers and technology by teaching machines how humans think, behave, and react toward different situations. هو سلوك وخصائص معينة تتسم بها البرامج الحاسوبية، تجعلها تحاكي القدرات الذهنية البشرية وأنماط عملها.	Social Media (Facebook, Instagram, Snapchat, Tweeter,…). وسائل التواصل الاجتماعي	No لا	Yes نعم	Yes نعم	Yes نعم	Do not know لا أعلم	Do not know لا أعلم	Yes نعم	No لا	No لا	Yes نعم	Do not know لا أعلم	Do not know لا أعلم	Do not know لا أعلم
Agree أوافق	Female أنثى	22	Saudi سعودي	جامعة حائل	Pharmacy الصيدلة	5th year السنة الخامسة	≤3.5	It is simulating human attitudes and abilities using computers and technology by teaching machines how humans think, behave, and react toward different situations. هو سلوك وخصائص معينة تتسم بها البرامج الحاسوبية، تجعلها تحاكي القدرات الذهنية البشرية وأنماط عملها.	Social Media (Facebook, Instagram, Snapchat, Tweeter,…). وسائل التواصل الاجتماعي, Internet (web pages, online databases,...). الإنترنت (صفحات الويب، قواعد البيانات، ...), Video games. ألعاب الفيديو, Friends. أصدقاء	No لا	Yes نعم	Yes نعم	Yes نعم	No لا	Do not know لا أعلم	Yes نعم	Do not know لا أعلم	Yes نعم	No لا	No لا	No لا	No لا
Agree أوافق	Female أنثى	22	Saudi سعودي	جامعة حائل	Pharmacy الصيدلة	5th year السنة الخامسة	3.5-4	It is simulating human attitudes and abilities using computers and technology by teaching machines how humans think, behave, and react toward different situations. هو سلوك وخصائص معينة تتسم بها البرامج الحاسوبية، تجعلها تحاكي القدرات الذهنية البشرية وأنماط عملها.	Print Media (books, magazines, newspapers). وسائل الإعلام المطبوعة (كتب، مجلات، صحف)., Social Media (Facebook, Instagram, Snapchat, Tweeter,…). وسائل التواصل الاجتماعي, Internet (web pages, online databases,...). الإنترنت (صفحات الويب، قواعد البيانات، ...), Video games. ألعاب الفيديو, Family members. أفراد الأسرة, Friends. أصدقاء	No لا	Yes نعم	Yes نعم	Yes نعم	Yes نعم	Yes نعم	Yes نعم	No لا	Yes نعم	Yes نعم	No لا	No لا	Yes نعم
Agree أوافق	Male ذكر	28	Saudi سعودي	Almareefa university	Medicine الطب	5th year السنة الخامسة	≤3.5	It is simulating human attitudes and abilities using computers and technology by teaching machines how humans think, behave, and react toward different situations. هو سلوك وخصائص معينة تتسم بها البرامج الحاسوبية، تجعلها تحاكي القدرات الذهنية البشرية وأنماط عملها.	Social Media (Facebook, Instagram, Snapchat, Tweeter,…). وسائل التواصل الاجتماعي	No لا	Yes نعم	Yes نعم	Yes نعم	No لا	Yes نعم	Yes نعم	Yes نعم	Yes نعم	No لا	Do not know لا أعلم	Do not know لا أعلم	Do not know لا أعلم
Agree أوافق	Female أنثى	25	Non-Saudi غير سعودي	كليات الريان	Medicine الطب	intern إنترن	>4.5	It is simulating human attitudes and abilities using computers and technology by teaching machines how humans think, behave, and react toward different situations. هو سلوك وخصائص معينة تتسم بها البرامج الحاسوبية، تجعلها تحاكي القدرات الذهنية البشرية وأنماط عملها.	Social Media (Facebook, Instagram, Snapchat, Tweeter,…). وسائل التواصل الاجتماعي, Internet (web pages, online databases,...). الإنترنت (صفحات الويب، قواعد البيانات، ...)	No لا	Yes نعم	No لا	Yes نعم	Yes نعم	Yes نعم	Yes نعم	No لا	Yes نعم	No لا	No لا	No لا	No لا
Agree أوافق	Male ذكر	34	Saudi سعودي	Tabuk University, Tabuk. جامعة تبوك، تبوك	الفيزياء الطبية	Postgraduate (e.g. MSc. or PhD) دراسات عليا (ماجستير أو دكتوراه)	>4.5	It is simulating human attitudes and abilities using computers and technology by teaching machines how humans think, behave, and react toward different situations. هو سلوك وخصائص معينة تتسم بها البرامج الحاسوبية، تجعلها تحاكي القدرات الذهنية البشرية وأنماط عملها.	Social Media (Facebook, Instagram, Snapchat, Tweeter,…). وسائل التواصل الاجتماعي, Internet (web pages, online databases,...). الإنترنت (صفحات الويب، قواعد البيانات، ...)	No لا	Yes نعم	Yes نعم	Yes نعم	Do not know لا أعلم	Do not know لا أعلم	Yes نعم	Yes نعم	Yes نعم	Yes نعم	Do not know لا أعلم	Yes نعم	Yes نعم
Agree أوافق	Female أنثى	20	Saudi سعودي	Taibah University, Madinah. جامعة طيبة، المدينة	Pharmacy الصيدلة	1st year السنة الأولى	4-4.5	It is simulating human attitudes and abilities using computers and technology by teaching machines how humans think, behave, and react toward different situations. هو سلوك وخصائص معينة تتسم بها البرامج الحاسوبية، تجعلها تحاكي القدرات الذهنية البشرية وأنماط عملها.	Academic courses المناهج الدراسية, Print Media (books, magazines, newspapers). وسائل الإعلام المطبوعة (كتب، مجلات، صحف)., Broadcast Media (TV, Radio). وسائل الإعلام المرئية (تلفزيون ، راديو), Outdoor Media (e.g.Billboards, Transit Ads,..). وسائل الإعلام الخارجية (مثل اللوحات الإعلانية والجدارية،..), Social Media (Facebook, Instagram, Snapchat, Tweeter,…). وسائل التواصل الاجتماعي, Internet (web pa…	No لا	Yes نعم	Do not know لا أعلم	No لا	Yes نعم	No لا	Do not know لا أعلم	Yes نعم	Yes نعم	No لا	Yes نعم	No لا	No لا
Agree أوافق	Male ذكر	19	Saudi سعودي	Taibah University, Madinah. جامعة طيبة، المدينة	Pharmacy الصيدلة	1st year السنة الأولى	4-4.5	It is simulating human attitudes and abilities using computers and technology by teaching machines how humans think, behave, and react toward different situations. هو سلوك وخصائص معينة تتسم بها البرامج الحاسوبية، تجعلها تحاكي القدرات الذهنية البشرية وأنماط عملها.	Broadcast Media (TV, Radio). وسائل الإعلام المرئية (تلفزيون ، راديو), Social Media (Facebook, Instagram, Snapchat, Tweeter,…). وسائل التواصل الاجتماعي, Internet (web pages, online databases,...). الإنترنت (صفحات الويب، قواعد البيانات، ...), Friends. أصدقاء	No لا	Yes نعم	Yes نعم	Yes نعم	Yes نعم	Yes نعم	Do not know لا أعلم	Do not know لا أعلم	Yes نعم	No لا	No لا	Yes نعم	Yes نعم
Agree أوافق	Female أنثى	20	Saudi سعودي	Taibah University, Madinah. جامعة طيبة، المدينة	Pharmacy الصيدلة	1st year السنة الأولى	4-4.5	It is simulating human attitudes and abilities using computers and technology by teaching machines how humans think, behave, and react toward different situations. هو سلوك وخصائص معينة تتسم بها البرامج الحاسوبية، تجعلها تحاكي القدرات الذهنية البشرية وأنماط عملها.	Broadcast Media (TV, Radio). وسائل الإعلام المرئية (تلفزيون ، راديو), Social Media (Facebook, Instagram, Snapchat, Tweeter,…). وسائل التواصل الاجتماعي, Internet (web pages, online databases,...). الإنترنت (صفحات الويب، قواعد البيانات، ...)	No لا	Yes نعم	Yes نعم	Yes نعم	Yes نعم	No لا	Yes نعم	Yes نعم	Yes نعم	No لا	Do not know لا أعلم	Do not know لا أعلم	Yes نعم
Agree أوافق	Female أنثى	22	Saudi سعودي	Taibah University, Madinah. جامعة طيبة، المدينة	Medicine الطب	4th year السنة الرابعة	>4.5	It is simulating human attitudes and abilities using computers and technology by teaching machines how humans think, behave, and react toward different situations. هو سلوك وخصائص معينة تتسم بها البرامج الحاسوبية، تجعلها تحاكي القدرات الذهنية البشرية وأنماط عملها.	Family members. أفراد الأسرة	No لا	No لا	No لا	No لا	Yes نعم	No لا	Yes نعم	No لا	No لا	No لا	No لا	No لا	No لا
Agree أوافق	Female أنثى	21	Saudi سعودي	Taibah University, Madinah. جامعة طيبة، المدينة	Medicine الطب	3rd year السنة الثالثة	>4.5	It is simulating human attitudes and abilities using computers and technology by teaching machines how humans think, behave, and react toward different situations. هو سلوك وخصائص معينة تتسم بها البرامج الحاسوبية، تجعلها تحاكي القدرات الذهنية البشرية وأنماط عملها.	Broadcast Media (TV, Radio). وسائل الإعلام المرئية (تلفزيون ، راديو), Social Media (Facebook, Instagram, Snapchat, Tweeter,…). وسائل التواصل الاجتماعي, Internet (web pages, online databases,...). الإنترنت (صفحات الويب، قواعد البيانات، ...), Family members. أفراد الأسرة	No لا	Yes نعم	Yes نعم	Do not know لا أعلم	Yes نعم	Yes نعم	Yes نعم	No لا	Yes نعم	No لا	Do not know لا أعلم	No لا	No لا
Agree أوافق	Female أنثى	22	Saudi سعودي	جامعة حائل	Nursing التمريض	RN	3.5-4	It is simulating human attitudes and abilities using computers and technology by teaching machines how humans think, behave, and react toward different situations. هو سلوك وخصائص معينة تتسم بها البرامج الحاسوبية، تجعلها تحاكي القدرات الذهنية البشرية وأنماط عملها.	Print Media (books, magazines, newspapers). وسائل الإعلام المطبوعة (كتب، مجلات، صحف)., Broadcast Media (TV, Radio). وسائل الإعلام المرئية (تلفزيون ، راديو), Outdoor Media (e.g.Billboards, Transit Ads,..). وسائل الإعلام الخارجية (مثل اللوحات الإعلانية والجدارية،..), Social Media (Facebook, Instagram, Snapchat, Tweeter,…). وسائل التواصل الاجتماعي	No لا	Yes نعم	Yes نعم	Yes نعم	Yes نعم	Yes نعم	Yes نعم	Yes نعم	Yes نعم	No لا	Do not know لا أعلم	Do not know لا أعلم	Yes نعم
Agree أوافق	Male ذكر	21	Saudi سعودي	Taibah University, Madinah. جامعة طيبة، المدينة	Medicine الطب	4th year السنة الرابعة	>4.5	It is simulating human attitudes and abilities using computers and technology by teaching machines how humans think, behave, and react toward different situations. هو سلوك وخصائص معينة تتسم بها البرامج الحاسوبية، تجعلها تحاكي القدرات الذهنية البشرية وأنماط عملها.	Broadcast Media (TV, Radio). وسائل الإعلام المرئية (تلفزيون ، راديو), Internet (web pages, online databases,...). الإنترنت (صفحات الويب، قواعد البيانات، ...)	No لا	Yes نعم	Yes نعم	Yes نعم	Yes نعم	Yes نعم	Yes نعم	No لا	Yes نعم	Yes نعم	Do not know لا أعلم	Do not know لا أعلم	Yes نعم
Agree أوافق	Male ذكر	22	Saudi سعودي	Taibah University, Madinah. جامعة طيبة، المدينة	Medicine الطب	3rd year السنة الثالثة	4-4.5	It is simulating human attitudes and abilities using computers and technology by teaching machines how humans think, behave, and react toward different situations. هو سلوك وخصائص معينة تتسم بها البرامج الحاسوبية، تجعلها تحاكي القدرات الذهنية البشرية وأنماط عملها.	Broadcast Media (TV, Radio). وسائل الإعلام المرئية (تلفزيون ، راديو), Social Media (Facebook, Instagram, Snapchat, Tweeter,…). وسائل التواصل الاجتماعي, Family members. أفراد الأسرة	No لا	Yes نعم	No لا	No لا	No لا	Yes نعم	No لا	No لا	No لا	Yes نعم	No لا	No لا	No لا
Agree أوافق	Female أنثى	19	Saudi سعودي	جامعة طيبة	Pharmacy الصيدلة	1st year السنة الأولى	>4.5	It is simulating human attitudes and abilities using computers and technology by teaching machines how humans think, behave, and react toward different situations. هو سلوك وخصائص معينة تتسم بها البرامج الحاسوبية، تجعلها تحاكي القدرات الذهنية البشرية وأنماط عملها.	Print Media (books, magazines, newspapers). وسائل الإعلام المطبوعة (كتب، مجلات، صحف)., Broadcast Media (TV, Radio). وسائل الإعلام المرئية (تلفزيون ، راديو), Outdoor Media (e.g.Billboards, Transit Ads,..). وسائل الإعلام الخارجية (مثل اللوحات الإعلانية والجدارية،..), Social Media (Facebook, Instagram, Snapchat, Tweeter,…). وسائل التواصل الاجتماعي, Internet (web pages, online databases,...). الإنترن…	No لا	Yes نعم	Yes نعم	Yes نعم	Yes نعم	Do not know لا أعلم	Yes نعم	No لا	No لا	No لا	Yes نعم	Do not know لا أعلم	No لا
Agree أوافق	Male ذكر	19	Saudi سعودي	Taibah University, Madinah. جامعة طيبة، المدينة	Pharmacy الصيدلة	1st year السنة الأولى	>4.5	It is simulating human attitudes and abilities using computers and technology by teaching machines how humans think, behave, and react toward different situations. هو سلوك وخصائص معينة تتسم بها البرامج الحاسوبية، تجعلها تحاكي القدرات الذهنية البشرية وأنماط عملها.	Internet (web pages, online databases,...). الإنترنت (صفحات الويب، قواعد البيانات، ...), Video games. ألعاب الفيديو	No لا	Do not know لا أعلم	Yes نعم	Do not know لا أعلم	Yes نعم	Do not know لا أعلم	Yes نعم	No لا	No لا	No لا	Yes نعم	Yes نعم	Yes نعم
Agree أوافق	Female أنثى	21	Saudi سعودي	King Khalid University, Abha. جامعة الملك خالد، أبها	Medicine الطب	4th year السنة الرابعة	>4.5	It is simulating human attitudes and abilities using computers and technology by teaching machines how humans think, behave, and react toward different situations. هو سلوك وخصائص معينة تتسم بها البرامج الحاسوبية، تجعلها تحاكي القدرات الذهنية البشرية وأنماط عملها.	Academic courses المناهج الدراسية, Family members. أفراد الأسرة	No لا	No لا	Do not know لا أعلم	Yes نعم	No لا	Yes نعم	No لا	No لا	No لا	Yes نعم	No لا	No لا	Yes نعم
Agree أوافق	Male ذكر	22	Saudi سعودي	Taibah University, Madinah. جامعة طيبة، المدينة	Medicine الطب	3rd year السنة الثالثة	4-4.5	It is simulating human attitudes and abilities using computers and technology by teaching machines how humans think, behave, and react toward different situations. هو سلوك وخصائص معينة تتسم بها البرامج الحاسوبية، تجعلها تحاكي القدرات الذهنية البشرية وأنماط عملها.	Academic courses المناهج الدراسية, Outdoor Media (e.g.Billboards, Transit Ads,..). وسائل الإعلام الخارجية (مثل اللوحات الإعلانية والجدارية،..), Social Media (Facebook, Instagram, Snapchat, Tweeter,…). وسائل التواصل الاجتماعي, Internet (web pages, online databases,...). الإنترنت (صفحات الويب، قواعد البيانات، ...), Video games. ألعاب الفيديو	No لا	Yes نعم	Yes نعم	Yes نعم	No لا	Do not know لا أعلم	Yes نعم	No لا	Yes نعم	No لا	No لا	No لا	No لا
Agree أوافق	Female أنثى	23	Saudi سعودي	جامعة المعرفة، الرياض	Medicine الطب	5th year السنة الخامسة	3.5-4	It is simulating human attitudes and abilities using computers and technology by teaching machines how humans think, behave, and react toward different situations. هو سلوك وخصائص معينة تتسم بها البرامج الحاسوبية، تجعلها تحاكي القدرات الذهنية البشرية وأنماط عملها.	Social Media (Facebook, Instagram, Snapchat, Tweeter,…). وسائل التواصل الاجتماعي, Internet (web pages, online databases,...). الإنترنت (صفحات الويب، قواعد البيانات، ...), Video games. ألعاب الفيديو, Family members. أفراد الأسرة	No لا	Yes نعم	Yes نعم	Yes نعم	No لا	Yes نعم	Yes نعم	Yes نعم	Yes نعم	No لا	No لا	No لا	No لا
Agree أوافق	Female أنثى	21	Saudi سعودي	حائل	Pharmacy الصيدلة	5th year السنة الخامسة	≤3.5	It is simulating human attitudes and abilities using computers and technology by teaching machines how humans think, behave, and react toward different situations. هو سلوك وخصائص معينة تتسم بها البرامج الحاسوبية، تجعلها تحاكي القدرات الذهنية البشرية وأنماط عملها.	Social Media (Facebook, Instagram, Snapchat, Tweeter,…). وسائل التواصل الاجتماعي	No لا	Yes نعم	Yes نعم	Yes نعم	Yes نعم	Yes نعم	Yes نعم	Yes نعم	Yes نعم	Yes نعم	No لا	No لا	Yes نعم
Agree أوافق	Female أنثى	20	Saudi سعودي	King Khalid University, Abha. جامعة الملك خالد، أبها	مختبرات طبية	4th year السنة الرابعة	>4.5	It is simulating human attitudes and abilities using computers and technology by teaching machines how humans think, behave, and react toward different situations. هو سلوك وخصائص معينة تتسم بها البرامج الحاسوبية، تجعلها تحاكي القدرات الذهنية البشرية وأنماط عملها.	Academic courses المناهج الدراسية, Social Media (Facebook, Instagram, Snapchat, Tweeter,…). وسائل التواصل الاجتماعي, Internet (web pages, online databases,...). الإنترنت (صفحات الويب، قواعد البيانات، ...)	No لا	Yes نعم	Yes نعم	Yes نعم	No لا	Do not know لا أعلم	Do not know لا أعلم	No لا	No لا	Yes نعم	No لا	Do not know لا أعلم	Yes نعم
Agree أوافق	Female أنثى	21	Saudi سعودي	King Khalid University, Abha. جامعة الملك خالد، أبها	الصحة العامة	2nd year السنة الثانية	4-4.5	It is simulating human attitudes and abilities using computers and technology by teaching machines how humans think, behave, and react toward different situations. هو سلوك وخصائص معينة تتسم بها البرامج الحاسوبية، تجعلها تحاكي القدرات الذهنية البشرية وأنماط عملها.	Print Media (books, magazines, newspapers). وسائل الإعلام المطبوعة (كتب، مجلات، صحف)., Social Media (Facebook, Instagram, Snapchat, Tweeter,…). وسائل التواصل الاجتماعي, Family members. أفراد الأسرة, Friends. أصدقاء	No لا	Yes نعم	Yes نعم	Do not know لا أعلم	Yes نعم	Yes نعم	Yes نعم	No لا	Yes نعم	No لا	Yes نعم	Yes نعم	No لا
Agree أوافق	Male ذكر	21	Saudi سعودي	King Khalid University, Abha. جامعة الملك خالد، أبها	Radiology الأشعة	2nd year السنة الثانية	4-4.5	It is simulating human attitudes and abilities using computers and technology by teaching machines how humans think, behave, and react toward different situations. هو سلوك وخصائص معينة تتسم بها البرامج الحاسوبية، تجعلها تحاكي القدرات الذهنية البشرية وأنماط عملها.	Social Media (Facebook, Instagram, Snapchat, Tweeter,…). وسائل التواصل الاجتماعي	No لا	Yes نعم	Yes نعم	Yes نعم	Yes نعم	Yes نعم	Yes نعم	Yes نعم	Yes نعم	Yes نعم	Yes نعم	Yes نعم	Yes نعم
Agree أوافق	Female أنثى	20	Saudi سعودي	King Khalid University, Abha. جامعة الملك خالد، أبها	مختبرات	2nd year السنة الثانية	3.5-4	It is simulating human attitudes and abilities using computers and technology by teaching machines how humans think, behave, and react toward different situations. هو سلوك وخصائص معينة تتسم بها البرامج الحاسوبية، تجعلها تحاكي القدرات الذهنية البشرية وأنماط عملها.	Academic courses المناهج الدراسية, Print Media (books, magazines, newspapers). وسائل الإعلام المطبوعة (كتب، مجلات، صحف)., Broadcast Media (TV, Radio). وسائل الإعلام المرئية (تلفزيون ، راديو), Outdoor Media (e.g.Billboards, Transit Ads,..). وسائل الإعلام الخارجية (مثل اللوحات الإعلانية والجدارية،..), Social Media (Facebook, Instagram, Snapchat, Tweeter,…). وسائل التواصل الاجتماعي, Internet (web pa…	Yes- as a personal effort. نعم كرغبة شخصية	Yes نعم	No لا	Do not know لا أعلم	Yes نعم	No لا	Yes نعم	Yes نعم	Yes نعم	No لا	Yes نعم	No لا	Yes نعم
Agree أوافق	Female أنثى	21	Saudi سعودي	Batterjee Medical College, Jeddah. كلية البترجي الطبية، جدة	Medicine الطب	3rd year السنة الثالثة	>4.5	It is simulating human attitudes and abilities using computers and technology by teaching machines how humans think, behave, and react toward different situations. هو سلوك وخصائص معينة تتسم بها البرامج الحاسوبية، تجعلها تحاكي القدرات الذهنية البشرية وأنماط عملها.	Academic courses المناهج الدراسية, Print Media (books, magazines, newspapers). وسائل الإعلام المطبوعة (كتب، مجلات، صحف)., Broadcast Media (TV, Radio). وسائل الإعلام المرئية (تلفزيون ، راديو), Outdoor Media (e.g.Billboards, Transit Ads,..). وسائل الإعلام الخارجية (مثل اللوحات الإعلانية والجدارية،..), Social Media (Facebook, Instagram, Snapchat, Tweeter,…). وسائل التواصل الاجتماعي, Internet (web pa…	Yes- as a personal effort. نعم كرغبة شخصية	Yes نعم	Yes نعم	Yes نعم	Yes نعم	Yes نعم	Yes نعم	Yes نعم	Yes نعم	Yes نعم	Do not know لا أعلم	Do not know لا أعلم	Do not know لا أعلم
Agree أوافق	Female أنثى	22	Saudi سعودي	King Abdulaziz University, Jeddah. جامعة الملك عبد العزيز، جدة	Medicine الطب	4th year السنة الرابعة	>4.5	It is simulating human attitudes and abilities using computers and technology by teaching machines how humans think, behave, and react toward different situations. هو سلوك وخصائص معينة تتسم بها البرامج الحاسوبية، تجعلها تحاكي القدرات الذهنية البشرية وأنماط عملها.	Academic courses المناهج الدراسية, Print Media (books, magazines, newspapers). وسائل الإعلام المطبوعة (كتب، مجلات، صحف)., Broadcast Media (TV, Radio). وسائل الإعلام المرئية (تلفزيون ، راديو), Outdoor Media (e.g.Billboards, Transit Ads,..). وسائل الإعلام الخارجية (مثل اللوحات الإعلانية والجدارية،..), Social Media (Facebook, Instagram, Snapchat, Tweeter,…). وسائل التواصل الاجتماعي, Internet (web pa…	Yes- as a personal effort. نعم كرغبة شخصية	Yes نعم	Yes نعم	Yes نعم	Yes نعم	Yes نعم	Yes نعم	Yes نعم	Yes نعم	Yes نعم	Do not know لا أعلم	Yes نعم	Yes نعم
Agree أوافق	Female أنثى	21	Saudi سعودي	Fakeeh College of Medical Sciences, Jeddah. كلية فقيه للعلوم الطبية، جدة.	Medicine الطب	3rd year السنة الثالثة	>4.5	It is simulating human attitudes and abilities using computers and technology by teaching machines how humans think, behave, and react toward different situations. هو سلوك وخصائص معينة تتسم بها البرامج الحاسوبية، تجعلها تحاكي القدرات الذهنية البشرية وأنماط عملها.	Print Media (books, magazines, newspapers). وسائل الإعلام المطبوعة (كتب، مجلات، صحف)., Outdoor Media (e.g.Billboards, Transit Ads,..). وسائل الإعلام الخارجية (مثل اللوحات الإعلانية والجدارية،..), Social Media (Facebook, Instagram, Snapchat, Tweeter,…). وسائل التواصل الاجتماعي, Internet (web pages, online databases,...). الإنترنت (صفحات الويب، قواعد البيانات، ...), Family members. أفراد الأسرة, Fr…	Yes- as a personal effort. نعم كرغبة شخصية	Yes نعم	Yes نعم	Yes نعم	Do not know لا أعلم	Yes نعم	Yes نعم	Do not know لا أعلم	Do not know لا أعلم	Yes نعم	Do not know لا أعلم	Yes نعم	Do not know لا أعلم
Agree أوافق	Female أنثى	25	Saudi سعودي	الامام عبدالرحمن بن فيصل	Medicine الطب	intern إنترن	4-4.5	It is simulating human attitudes and abilities using computers and technology by teaching machines how humans think, behave, and react toward different situations. هو سلوك وخصائص معينة تتسم بها البرامج الحاسوبية، تجعلها تحاكي القدرات الذهنية البشرية وأنماط عملها.	Print Media (books, magazines, newspapers). وسائل الإعلام المطبوعة (كتب، مجلات، صحف)., Social Media (Facebook, Instagram, Snapchat, Tweeter,…). وسائل التواصل الاجتماعي, Internet (web pages, online databases,...). الإنترنت (صفحات الويب، قواعد البيانات، ...)	No لا	Yes نعم	Yes نعم	Yes نعم	Yes نعم	Yes نعم	Yes نعم	No لا	Yes نعم	No لا	No لا	Yes نعم	Yes نعم
Agree أوافق	Female أنثى	20	Saudi سعودي	Taibah University, Madinah. جامعة طيبة، المدينة	Pharmacy الصيدلة	2nd year السنة الثانية	4-4.5	It is simulating human attitudes and abilities using computers and technology by teaching machines how humans think, behave, and react toward different situations. هو سلوك وخصائص معينة تتسم بها البرامج الحاسوبية، تجعلها تحاكي القدرات الذهنية البشرية وأنماط عملها.	Social Media (Facebook, Instagram, Snapchat, Tweeter,…). وسائل التواصل الاجتماعي, Internet (web pages, online databases,...). الإنترنت (صفحات الويب، قواعد البيانات، ...), Family members. أفراد الأسرة, Friends. أصدقاء	No لا	Yes نعم	Yes نعم	Yes نعم	Yes نعم	Yes نعم	Do not know لا أعلم	Do not know لا أعلم	Yes نعم	No لا	No لا	No لا	No لا
Agree أوافق	Male ذكر	22	Saudi سعودي	جامعة حائل	Medicine الطب	3rd year السنة الثالثة	3.5-4	It is simulating human attitudes and abilities using computers and technology by teaching machines how humans think, behave, and react toward different situations. هو سلوك وخصائص معينة تتسم بها البرامج الحاسوبية، تجعلها تحاكي القدرات الذهنية البشرية وأنماط عملها.	Broadcast Media (TV, Radio). وسائل الإعلام المرئية (تلفزيون ، راديو), Social Media (Facebook, Instagram, Snapchat, Tweeter,…). وسائل التواصل الاجتماعي, Internet (web pages, online databases,...). الإنترنت (صفحات الويب، قواعد البيانات، ...)	No لا	Yes نعم	Yes نعم	Yes نعم	Yes نعم	Yes نعم	No لا	Yes نعم	Yes نعم	No لا	Yes نعم	No لا	No لا
Agree أوافق	Male ذكر	22	Saudi سعودي	جامعة حائل	Medicine الطب	3rd year السنة الثالثة	3.5-4	It is simulating human attitudes and abilities using computers and technology by teaching machines how humans think, behave, and react toward different situations. هو سلوك وخصائص معينة تتسم بها البرامج الحاسوبية، تجعلها تحاكي القدرات الذهنية البشرية وأنماط عملها.	Broadcast Media (TV, Radio). وسائل الإعلام المرئية (تلفزيون ، راديو), Social Media (Facebook, Instagram, Snapchat, Tweeter,…). وسائل التواصل الاجتماعي	No لا	Yes نعم	Do not know لا أعلم	Do not know لا أعلم	Yes نعم	Yes نعم	Do not know لا أعلم	No لا	Yes نعم	No لا	Do not know لا أعلم	Do not know لا أعلم	Do not know لا أعلم
Agree أوافق	Female أنثى	22	Saudi سعودي	جامعة حائل	Medicine الطب	3rd year السنة الثالثة	>4.5	It is simulating human attitudes and abilities using computers and technology by teaching machines how humans think, behave, and react toward different situations. هو سلوك وخصائص معينة تتسم بها البرامج الحاسوبية، تجعلها تحاكي القدرات الذهنية البشرية وأنماط عملها.	Academic courses المناهج الدراسية, Broadcast Media (TV, Radio). وسائل الإعلام المرئية (تلفزيون ، راديو), Social Media (Facebook, Instagram, Snapchat, Tweeter,…). وسائل التواصل الاجتماعي, Friends. أصدقاء	No لا	Yes نعم	Yes نعم	Do not know لا أعلم	Yes نعم	No لا	Yes نعم	Do not know لا أعلم	Yes نعم	No لا	No لا	No لا	Do not know لا أعلم
Agree أوافق	Male ذكر	20	Saudi سعودي	جامعة حائل ،كلية الطب	Medicine الطب	1st year السنة الأولى	>4.5	It is simulating human attitudes and abilities using computers and technology by teaching machines how humans think, behave, and react toward different situations. هو سلوك وخصائص معينة تتسم بها البرامج الحاسوبية، تجعلها تحاكي القدرات الذهنية البشرية وأنماط عملها.	Broadcast Media (TV, Radio). وسائل الإعلام المرئية (تلفزيون ، راديو), Social Media (Facebook, Instagram, Snapchat, Tweeter,…). وسائل التواصل الاجتماعي, Internet (web pages, online databases,...). الإنترنت (صفحات الويب، قواعد البيانات، ...), Friends. أصدقاء	Yes- as a part of university curriculum. نعم كمنهج دراسي في الجامعة	Yes نعم	Yes نعم	Yes نعم	Yes نعم	Yes نعم	Yes نعم	Yes نعم	Yes نعم	Yes نعم	Yes نعم	Yes نعم	Yes نعم
Agree أوافق	Male ذكر	19	Saudi سعودي	جامعة حائل	Medicine الطب	1st year السنة الأولى	>4.5	It is simulating human attitudes and abilities using computers and technology by teaching machines how humans think, behave, and react toward different situations. هو سلوك وخصائص معينة تتسم بها البرامج الحاسوبية، تجعلها تحاكي القدرات الذهنية البشرية وأنماط عملها.	Social Media (Facebook, Instagram, Snapchat, Tweeter,…). وسائل التواصل الاجتماعي, Internet (web pages, online databases,...). الإنترنت (صفحات الويب، قواعد البيانات، ...), Video games. ألعاب الفيديو, Friends. أصدقاء	No لا	Yes نعم	Yes نعم	No لا	Yes نعم	Do not know لا أعلم	Yes نعم	No لا	Yes نعم	Yes نعم	No لا	No لا	No لا
Agree أوافق	Male ذكر	19	Saudi سعودي	جامعة حائل	Medicine الطب	1st year السنة الأولى	>4.5	It is simulating human attitudes and abilities using computers and technology by teaching machines how humans think, behave, and react toward different situations. هو سلوك وخصائص معينة تتسم بها البرامج الحاسوبية، تجعلها تحاكي القدرات الذهنية البشرية وأنماط عملها.	Print Media (books, magazines, newspapers). وسائل الإعلام المطبوعة (كتب، مجلات، صحف)., Broadcast Media (TV, Radio). وسائل الإعلام المرئية (تلفزيون ، راديو), Outdoor Media (e.g.Billboards, Transit Ads,..). وسائل الإعلام الخارجية (مثل اللوحات الإعلانية والجدارية،..), Social Media (Facebook, Instagram, Snapchat, Tweeter,…). وسائل التواصل الاجتماعي, Internet (web pages, online databases,...). الإنترن…	No لا	Yes نعم	Yes نعم	Yes نعم	Yes نعم	Yes نعم	Yes نعم	Yes نعم	Yes نعم	Yes نعم	Yes نعم	Yes نعم	Yes نعم
Agree أوافق	Female أنثى	19	Saudi سعودي	جامعة حائل	Medicine الطب	1st year السنة الأولى	≤3.5	It is simulating human attitudes and abilities using computers and technology by teaching machines how humans think, behave, and react toward different situations. هو سلوك وخصائص معينة تتسم بها البرامج الحاسوبية، تجعلها تحاكي القدرات الذهنية البشرية وأنماط عملها.	Social Media (Facebook, Instagram, Snapchat, Tweeter,…). وسائل التواصل الاجتماعي, Internet (web pages, online databases,...). الإنترنت (صفحات الويب، قواعد البيانات، ...)	No لا	Yes نعم	Yes نعم	No لا	No لا	Yes نعم	Yes نعم	No لا	Yes نعم	No لا	No لا	No لا	No لا
Agree أوافق	Female أنثى	18	Saudi سعودي	جامعة حائل	Medicine الطب	1st year السنة الأولى	>4.5	It is simulating human attitudes and abilities using computers and technology by teaching machines how humans think, behave, and react toward different situations. هو سلوك وخصائص معينة تتسم بها البرامج الحاسوبية، تجعلها تحاكي القدرات الذهنية البشرية وأنماط عملها.	Academic courses المناهج الدراسية, Social Media (Facebook, Instagram, Snapchat, Tweeter,…). وسائل التواصل الاجتماعي, Internet (web pages, online databases,...). الإنترنت (صفحات الويب، قواعد البيانات، ...), Video games. ألعاب الفيديو, Friends. أصدقاء	Yes- as a personal effort. نعم كرغبة شخصية	Yes نعم	Yes نعم	Yes نعم	Do not know لا أعلم	Yes نعم	Yes نعم	No لا	Yes نعم	Do not know لا أعلم	Yes نعم	Yes نعم	Yes نعم
Agree أوافق	Female أنثى	26	Saudi سعودي	King Saud University, Riyadh. جامعة الملك سعود، الرياض	Medicine الطب	2nd year السنة الثانية	≤3.5	It is simulating human attitudes and abilities using computers and technology by teaching machines how humans think, behave, and react toward different situations. هو سلوك وخصائص معينة تتسم بها البرامج الحاسوبية، تجعلها تحاكي القدرات الذهنية البشرية وأنماط عملها.	Social Media (Facebook, Instagram, Snapchat, Tweeter,…). وسائل التواصل الاجتماعي, Internet (web pages, online databases,...). الإنترنت (صفحات الويب، قواعد البيانات، ...)	No لا	Yes نعم	Yes نعم	Yes نعم	Yes نعم	Yes نعم	No لا	No لا	Yes نعم	No لا	Do not know لا أعلم	Do not know لا أعلم	Do not know لا أعلم
Agree أوافق	Female أنثى	20	Non-Saudi غير سعودي	Batterjee Medical College, Jeddah. كلية البترجي الطبية، جدة	Pharmacy الصيدلة	2nd year السنة الثانية	>4.5	It is simulating human attitudes and abilities using computers and technology by teaching machines how humans think, behave, and react toward different situations. هو سلوك وخصائص معينة تتسم بها البرامج الحاسوبية، تجعلها تحاكي القدرات الذهنية البشرية وأنماط عملها.	Broadcast Media (TV, Radio). وسائل الإعلام المرئية (تلفزيون ، راديو), Outdoor Media (e.g.Billboards, Transit Ads,..). وسائل الإعلام الخارجية (مثل اللوحات الإعلانية والجدارية،..), Social Media (Facebook, Instagram, Snapchat, Tweeter,…). وسائل التواصل الاجتماعي, Family members. أفراد الأسرة, Friends. أصدقاء	Yes- as a personal effort. نعم كرغبة شخصية	Yes نعم	Yes نعم	Yes نعم	No لا	Do not know لا أعلم	Yes نعم	No لا	Yes نعم	No لا	Do not know لا أعلم	Do not know لا أعلم	Do not know لا أعلم
Agree أوافق	Female أنثى	20	Saudi سعودي	King Abdulaziz University, Jeddah. جامعة الملك عبد العزيز، جدة	تغذية علاجية	2nd year السنة الثانية	4-4.5	It is simulating human attitudes and abilities using computers and technology by teaching machines how humans think, behave, and react toward different situations. هو سلوك وخصائص معينة تتسم بها البرامج الحاسوبية، تجعلها تحاكي القدرات الذهنية البشرية وأنماط عملها.	Academic courses المناهج الدراسية	No لا	Yes نعم	Yes نعم	Yes نعم	Yes نعم	Yes نعم	Yes نعم	Yes نعم	Yes نعم	No لا	Yes نعم	Do not know لا أعلم	Do not know لا أعلم
Agree أوافق	Female أنثى	21	Saudi سعودي	King Abdulaziz University, Jeddah. جامعة الملك عبد العزيز، جدة	تغذية علاجية Clinical Nutrition	1st year السنة الأولى	4-4.5	It is simulating human attitudes and abilities using computers and technology by teaching machines how humans think, behave, and react toward different situations. هو سلوك وخصائص معينة تتسم بها البرامج الحاسوبية، تجعلها تحاكي القدرات الذهنية البشرية وأنماط عملها.	Academic courses المناهج الدراسية, Print Media (books, magazines, newspapers). وسائل الإعلام المطبوعة (كتب، مجلات، صحف)., Broadcast Media (TV, Radio). وسائل الإعلام المرئية (تلفزيون ، راديو), Social Media (Facebook, Instagram, Snapchat, Tweeter,…). وسائل التواصل الاجتماعي, Internet (web pages, online databases,...). الإنترنت (صفحات الويب، قواعد البيانات، ...), Video games. ألعاب الفيديو, Family m…	No لا	Yes نعم	Yes نعم	Yes نعم	Yes نعم	Yes نعم	Yes نعم	Yes نعم	Yes نعم	No لا	No لا	No لا	No لا
Agree أوافق	Male ذكر	22	Saudi سعودي	الامام عبدالرحمن بن فيصل	Medicine الطب	3rd year السنة الثالثة	4-4.5	It is simulating human attitudes and abilities using computers and technology by teaching machines how humans think, behave, and react toward different situations. هو سلوك وخصائص معينة تتسم بها البرامج الحاسوبية، تجعلها تحاكي القدرات الذهنية البشرية وأنماط عملها.	Broadcast Media (TV, Radio). وسائل الإعلام المرئية (تلفزيون ، راديو), Social Media (Facebook, Instagram, Snapchat, Tweeter,…). وسائل التواصل الاجتماعي	No لا	Yes نعم	Yes نعم	Yes نعم	Yes نعم	Yes نعم	Yes نعم	Yes نعم	Yes نعم	No لا	No لا	No لا	No لا
Agree أوافق	Female أنثى	20	Saudi سعودي	King Abdulaziz University, Jeddah. جامعة الملك عبد العزيز، جدة	Medical laboratory	2nd year السنة الثانية	4-4.5	It is simulating human attitudes and abilities using computers and technology by teaching machines how humans think, behave, and react toward different situations. هو سلوك وخصائص معينة تتسم بها البرامج الحاسوبية، تجعلها تحاكي القدرات الذهنية البشرية وأنماط عملها.	Social Media (Facebook, Instagram, Snapchat, Tweeter,…). وسائل التواصل الاجتماعي	No لا	Do not know لا أعلم	Yes نعم	Yes نعم	No لا	Yes نعم	Do not know لا أعلم	No لا	No لا	No لا	Yes نعم	Do not know لا أعلم	Do not know لا أعلم
Agree أوافق	Female أنثى	36	Saudi سعودي	King Abdulaziz University, Jeddah. جامعة الملك عبد العزيز، جدة	تعقيم الطبي	دبلوم	>4.5	It is simulating human attitudes and abilities using computers and technology by teaching machines how humans think, behave, and react toward different situations. هو سلوك وخصائص معينة تتسم بها البرامج الحاسوبية، تجعلها تحاكي القدرات الذهنية البشرية وأنماط عملها.	Internet (web pages, online databases,...). الإنترنت (صفحات الويب، قواعد البيانات، ...)	No لا	Yes نعم	Yes نعم	Yes نعم	No لا	Yes نعم	Yes نعم	No لا	Yes نعم	Yes نعم	No لا	Yes نعم	Yes نعم
Agree أوافق	Female أنثى	18	Saudi سعودي	Umm Al Qura University, Makkah. جامعة أم القرى، مكة	Preparatory Year السنة التحضيرية	Preparatory Year السنة التحضيرية	3.5-4	It is simulating human attitudes and abilities using computers and technology by teaching machines how humans think, behave, and react toward different situations. هو سلوك وخصائص معينة تتسم بها البرامج الحاسوبية، تجعلها تحاكي القدرات الذهنية البشرية وأنماط عملها.	Print Media (books, magazines, newspapers). وسائل الإعلام المطبوعة (كتب، مجلات، صحف)., Broadcast Media (TV, Radio). وسائل الإعلام المرئية (تلفزيون ، راديو), Social Media (Facebook, Instagram, Snapchat, Tweeter,…). وسائل التواصل الاجتماعي, Family members. أفراد الأسرة	No لا	Yes نعم	Yes نعم	Yes نعم	Do not know لا أعلم	Yes نعم	Yes نعم	Yes نعم	Yes نعم	No لا	Yes نعم	Yes نعم	No لا
Agree أوافق	Male ذكر	18	Saudi سعودي	Umm Al Qura University, Makkah. جامعة أم القرى، مكة	Preparatory Year السنة التحضيرية	Preparatory Year السنة التحضيرية	4-4.5	It is simulating human attitudes and abilities using computers and technology by teaching machines how humans think, behave, and react toward different situations. هو سلوك وخصائص معينة تتسم بها البرامج الحاسوبية، تجعلها تحاكي القدرات الذهنية البشرية وأنماط عملها.	Print Media (books, magazines, newspapers). وسائل الإعلام المطبوعة (كتب، مجلات، صحف)., Social Media (Facebook, Instagram, Snapchat, Tweeter,…). وسائل التواصل الاجتماعي, Internet (web pages, online databases,...). الإنترنت (صفحات الويب، قواعد البيانات، ...), Video games. ألعاب الفيديو	No لا	Yes نعم	Yes نعم	Do not know لا أعلم	No لا	Yes نعم	Do not know لا أعلم	No لا	Yes نعم	No لا	No لا	No لا	Yes نعم
Agree أوافق	Male ذكر	18	Saudi سعودي	Umm Al Qura University, Makkah. جامعة أم القرى، مكة	Preparatory Year السنة التحضيرية	Preparatory Year السنة التحضيرية	≤3.5	It is simulating human attitudes and abilities using computers and technology by teaching machines how humans think, behave, and react toward different situations. هو سلوك وخصائص معينة تتسم بها البرامج الحاسوبية، تجعلها تحاكي القدرات الذهنية البشرية وأنماط عملها.	Social Media (Facebook, Instagram, Snapchat, Tweeter,…). وسائل التواصل الاجتماعي, Video games. ألعاب الفيديو, Friends. أصدقاء	Yes- as a personal effort. نعم كرغبة شخصية	Yes نعم	Yes نعم	No لا	Yes نعم	Yes نعم	Yes نعم	No لا	Yes نعم	Yes نعم	Yes نعم	Yes نعم	Yes نعم
Agree أوافق	Male ذكر	20	Saudi سعودي	Umm Al Qura University, Makkah. جامعة أم القرى، مكة	Medicine الطب	3rd year السنة الثالثة	>4.5	It is simulating human attitudes and abilities using computers and technology by teaching machines how humans think, behave, and react toward different situations. هو سلوك وخصائص معينة تتسم بها البرامج الحاسوبية، تجعلها تحاكي القدرات الذهنية البشرية وأنماط عملها.	Academic courses المناهج الدراسية, Social Media (Facebook, Instagram, Snapchat, Tweeter,…). وسائل التواصل الاجتماعي, Internet (web pages, online databases,...). الإنترنت (صفحات الويب، قواعد البيانات، ...), Family members. أفراد الأسرة, Friends. أصدقاء	No لا	Yes نعم	Yes نعم	Yes نعم	Yes نعم	Yes نعم	Yes نعم	Yes نعم	Yes نعم	Yes نعم	Yes نعم	Yes نعم	Yes نعم
Agree أوافق	Female أنثى	18	Saudi سعودي	Umm Al Qura University, Makkah. جامعة أم القرى، مكة	Preparatory Year السنة التحضيرية	Preparatory Year السنة التحضيرية	3.5-4	It is simulating human attitudes and abilities using computers and technology by teaching machines how humans think, behave, and react toward different situations. هو سلوك وخصائص معينة تتسم بها البرامج الحاسوبية، تجعلها تحاكي القدرات الذهنية البشرية وأنماط عملها.	Academic courses المناهج الدراسية, Broadcast Media (TV, Radio). وسائل الإعلام المرئية (تلفزيون ، راديو), Social Media (Facebook, Instagram, Snapchat, Tweeter,…). وسائل التواصل الاجتماعي, Internet (web pages, online databases,...). الإنترنت (صفحات الويب، قواعد البيانات، ...), Video games. ألعاب الفيديو	No لا	Yes نعم	Yes نعم	Yes نعم	Do not know لا أعلم	Yes نعم	Yes نعم	Do not know لا أعلم	Do not know لا أعلم	Yes نعم	Yes نعم	Yes نعم	Yes نعم
Agree أوافق	Female أنثى	21	Saudi سعودي	King Abdulaziz University, Jeddah. جامعة الملك عبد العزيز، جدة	التغذية الاكلينيكية	3rd year السنة الثالثة	>4.5	It is simulating human attitudes and abilities using computers and technology by teaching machines how humans think, behave, and react toward different situations. هو سلوك وخصائص معينة تتسم بها البرامج الحاسوبية، تجعلها تحاكي القدرات الذهنية البشرية وأنماط عملها.	Academic courses المناهج الدراسية, Broadcast Media (TV, Radio). وسائل الإعلام المرئية (تلفزيون ، راديو), Social Media (Facebook, Instagram, Snapchat, Tweeter,…). وسائل التواصل الاجتماعي, Internet (web pages, online databases,...). الإنترنت (صفحات الويب، قواعد البيانات، ...), Family members. أفراد الأسرة, Friends. أصدقاء	Yes- as a personal effort. نعم كرغبة شخصية	Yes نعم	Yes نعم	Yes نعم	Yes نعم	Yes نعم	Yes نعم	Yes نعم	Yes نعم	Do not know لا أعلم	Yes نعم	No لا	Yes نعم
Agree أوافق	Female أنثى	39	Non-Saudi غير سعودي	خارح المملكه	Pharmacy الصيدلة	Postgraduate (e.g. MSc. or PhD) دراسات عليا (ماجستير أو دكتوراه)	4-4.5	It is simulating human attitudes and abilities using computers and technology by teaching machines how humans think, behave, and react toward different situations. هو سلوك وخصائص معينة تتسم بها البرامج الحاسوبية، تجعلها تحاكي القدرات الذهنية البشرية وأنماط عملها.	Broadcast Media (TV, Radio). وسائل الإعلام المرئية (تلفزيون ، راديو), Social Media (Facebook, Instagram, Snapchat, Tweeter,…). وسائل التواصل الاجتماعي, Internet (web pages, online databases,...). الإنترنت (صفحات الويب، قواعد البيانات، ...)	No لا	Yes نعم	Yes نعم	Yes نعم	Yes نعم	Do not know لا أعلم	No لا	Yes نعم	Yes نعم	Yes نعم	No لا	No لا	Do not know لا أعلم
Agree أوافق	Female أنثى	23	Saudi سعودي	Ksau, com, jeddah	Medicine الطب	السنه السادسه	>4.5	It is simulating human attitudes and abilities using computers and technology by teaching machines how humans think, behave, and react toward different situations. هو سلوك وخصائص معينة تتسم بها البرامج الحاسوبية، تجعلها تحاكي القدرات الذهنية البشرية وأنماط عملها.	Academic courses المناهج الدراسية, Print Media (books, magazines, newspapers). وسائل الإعلام المطبوعة (كتب، مجلات، صحف)., Broadcast Media (TV, Radio). وسائل الإعلام المرئية (تلفزيون ، راديو), Outdoor Media (e.g.Billboards, Transit Ads,..). وسائل الإعلام الخارجية (مثل اللوحات الإعلانية والجدارية،..), Social Media (Facebook, Instagram, Snapchat, Tweeter,…). وسائل التواصل الاجتماعي, Internet (web pa…	No لا	Yes نعم	Yes نعم	Yes نعم	Yes نعم	Yes نعم	Yes نعم	Yes نعم	Yes نعم	Yes نعم	Yes نعم	Yes نعم	Do not know لا أعلم
Agree أوافق	Female أنثى	18	Saudi سعودي	Umm Al Qura University, Makkah. جامعة أم القرى، مكة	Preparatory Year السنة التحضيرية	Preparatory Year السنة التحضيرية	4-4.5	It is simulating human attitudes and abilities using computers and technology by teaching machines how humans think, behave, and react toward different situations. هو سلوك وخصائص معينة تتسم بها البرامج الحاسوبية، تجعلها تحاكي القدرات الذهنية البشرية وأنماط عملها.	Academic courses المناهج الدراسية, Social Media (Facebook, Instagram, Snapchat, Tweeter,…). وسائل التواصل الاجتماعي, Internet (web pages, online databases,...). الإنترنت (صفحات الويب، قواعد البيانات، ...)	Yes- as a personal effort. نعم كرغبة شخصية	Do not know لا أعلم	Yes نعم	Yes نعم	Yes نعم	Yes نعم	Yes نعم	Do not know لا أعلم	Yes نعم	Do not know لا أعلم	No لا	No لا	No لا
Agree أوافق	Female أنثى	19	Saudi سعودي	Umm Al Qura University, Makkah. جامعة أم القرى، مكة	Preparatory Year السنة التحضيرية	Preparatory Year السنة التحضيرية	>4.5	It is simulating human attitudes and abilities using computers and technology by teaching machines how humans think, behave, and react toward different situations. هو سلوك وخصائص معينة تتسم بها البرامج الحاسوبية، تجعلها تحاكي القدرات الذهنية البشرية وأنماط عملها.	Broadcast Media (TV, Radio). وسائل الإعلام المرئية (تلفزيون ، راديو), Social Media (Facebook, Instagram, Snapchat, Tweeter,…). وسائل التواصل الاجتماعي, Internet (web pages, online databases,...). الإنترنت (صفحات الويب، قواعد البيانات، ...), Family members. أفراد الأسرة	No لا	Yes نعم	Yes نعم	Yes نعم	Do not know لا أعلم	Yes نعم	Yes نعم	No لا	Yes نعم	No لا	No لا	No لا	Do not know لا أعلم
Agree أوافق	Female أنثى	19	Saudi سعودي	Umm Al Qura University, Makkah. جامعة أم القرى، مكة	Nursing التمريض	Preparatory Year السنة التحضيرية	4-4.5	It is simulating human attitudes and abilities using computers and technology by teaching machines how humans think, behave, and react toward different situations. هو سلوك وخصائص معينة تتسم بها البرامج الحاسوبية، تجعلها تحاكي القدرات الذهنية البشرية وأنماط عملها.	Academic courses المناهج الدراسية, Social Media (Facebook, Instagram, Snapchat, Tweeter,…). وسائل التواصل الاجتماعي, Internet (web pages, online databases,...). الإنترنت (صفحات الويب، قواعد البيانات، ...), Video games. ألعاب الفيديو	No لا	Yes نعم	No لا	Yes نعم	Yes نعم	Do not know لا أعلم	Yes نعم	No لا	No لا	No لا	No لا	Yes نعم	No لا
Agree أوافق	Female أنثى	19	Saudi سعودي	Umm Al Qura University, Makkah. جامعة أم القرى، مكة	Nursing التمريض	Preparatory Year السنة التحضيرية	4-4.5	It is simulating human attitudes and abilities using computers and technology by teaching machines how humans think, behave, and react toward different situations. هو سلوك وخصائص معينة تتسم بها البرامج الحاسوبية، تجعلها تحاكي القدرات الذهنية البشرية وأنماط عملها.	Academic courses المناهج الدراسية, Broadcast Media (TV, Radio). وسائل الإعلام المرئية (تلفزيون ، راديو), Social Media (Facebook, Instagram, Snapchat, Tweeter,…). وسائل التواصل الاجتماعي, Internet (web pages, online databases,...). الإنترنت (صفحات الويب، قواعد البيانات، ...), Video games. ألعاب الفيديو, Friends. أصدقاء	No لا	Yes نعم	Yes نعم	Yes نعم	Yes نعم	Yes نعم	Yes نعم	No لا	Yes نعم	Yes نعم	Yes نعم	Yes نعم	Yes نعم
Agree أوافق	Female أنثى	19	Saudi سعودي	King Abdulaziz University, Jeddah. جامعة الملك عبد العزيز، جدة	Medicine الطب	1st year السنة الأولى	>4.5	It is simulating human attitudes and abilities using computers and technology by teaching machines how humans think, behave, and react toward different situations. هو سلوك وخصائص معينة تتسم بها البرامج الحاسوبية، تجعلها تحاكي القدرات الذهنية البشرية وأنماط عملها.	Social Media (Facebook, Instagram, Snapchat, Tweeter,…). وسائل التواصل الاجتماعي, Internet (web pages, online databases,...). الإنترنت (صفحات الويب، قواعد البيانات، ...), Video games. ألعاب الفيديو, Family members. أفراد الأسرة	No لا	Yes نعم	Yes نعم	Yes نعم	Yes نعم	Do not know لا أعلم	Yes نعم	Yes نعم	Yes نعم	No لا	No لا	Yes نعم	Yes نعم
Agree أوافق	Female أنثى	24	Saudi سعودي	King Abdulaziz University, Jeddah. جامعة الملك عبد العزيز، جدة	Clinical Nutrition	Postgraduate (e.g. MSc. or PhD) دراسات عليا (ماجستير أو دكتوراه)	>4.5	It is simulating human attitudes and abilities using computers and technology by teaching machines how humans think, behave, and react toward different situations. هو سلوك وخصائص معينة تتسم بها البرامج الحاسوبية، تجعلها تحاكي القدرات الذهنية البشرية وأنماط عملها.	Social Media (Facebook, Instagram, Snapchat, Tweeter,…). وسائل التواصل الاجتماعي, Family members. أفراد الأسرة, Friends. أصدقاء	Yes- as a personal effort. نعم كرغبة شخصية	Yes نعم	Yes نعم	Yes نعم	Yes نعم	Yes نعم	Yes نعم	Yes نعم	Yes نعم	No لا	No لا	No لا	No لا
Agree أوافق	Female أنثى	31	Saudi سعودي	Jedmed	Dentistry طب الأسنان	Postgraduate (e.g. MSc. or PhD) دراسات عليا (ماجستير أو دكتوراه)	4-4.5	It is simulating human attitudes and abilities using computers and technology by teaching machines how humans think, behave, and react toward different situations. هو سلوك وخصائص معينة تتسم بها البرامج الحاسوبية، تجعلها تحاكي القدرات الذهنية البشرية وأنماط عملها.	Social Media (Facebook, Instagram, Snapchat, Tweeter,…). وسائل التواصل الاجتماعي, Internet (web pages, online databases,...). الإنترنت (صفحات الويب، قواعد البيانات، ...)	No لا	Yes نعم	Do not know لا أعلم	Yes نعم	Yes نعم	Yes نعم	Yes نعم	Do not know لا أعلم	Do not know لا أعلم	No لا	Do not know لا أعلم	Do not know لا أعلم	Yes نعم
Agree أوافق	Male ذكر	18	Saudi سعودي	Umm Al Qura University, Makkah. جامعة أم القرى، مكة	Preparatory Year السنة التحضيرية	Preparatory Year السنة التحضيرية	>4.5	It is simulating human attitudes and abilities using computers and technology by teaching machines how humans think, behave, and react toward different situations. هو سلوك وخصائص معينة تتسم بها البرامج الحاسوبية، تجعلها تحاكي القدرات الذهنية البشرية وأنماط عملها.	Print Media (books, magazines, newspapers). وسائل الإعلام المطبوعة (كتب، مجلات، صحف)., Broadcast Media (TV, Radio). وسائل الإعلام المرئية (تلفزيون ، راديو), Outdoor Media (e.g.Billboards, Transit Ads,..). وسائل الإعلام الخارجية (مثل اللوحات الإعلانية والجدارية،..), Social Media (Facebook, Instagram, Snapchat, Tweeter,…). وسائل التواصل الاجتماعي, Internet (web pages, online databases,...). الإنترن…	Yes- as a part of university curriculum. نعم كمنهج دراسي في الجامعة	Yes نعم	Yes نعم	Yes نعم	Do not know لا أعلم	Yes نعم	Yes نعم	Yes نعم	Yes نعم	No لا	No لا	Yes نعم	Yes نعم
Agree أوافق	Male ذكر	18	Saudi سعودي	Umm Al Qura University, Makkah. جامعة أم القرى، مكة	Preparatory Year السنة التحضيرية	Preparatory Year السنة التحضيرية	≤3.5	It is simulating human attitudes and abilities using computers and technology by teaching machines how humans think, behave, and react toward different situations. هو سلوك وخصائص معينة تتسم بها البرامج الحاسوبية، تجعلها تحاكي القدرات الذهنية البشرية وأنماط عملها.	Academic courses المناهج الدراسية, Print Media (books, magazines, newspapers). وسائل الإعلام المطبوعة (كتب، مجلات، صحف)., Broadcast Media (TV, Radio). وسائل الإعلام المرئية (تلفزيون ، راديو), Social Media (Facebook, Instagram, Snapchat, Tweeter,…). وسائل التواصل الاجتماعي, Internet (web pages, online databases,...). الإنترنت (صفحات الويب، قواعد البيانات، ...), Video games. ألعاب الفيديو, Family m…	No لا	Yes نعم	Yes نعم	Yes نعم	Yes نعم	Yes نعم	Yes نعم	Yes نعم	Yes نعم	No لا	Yes نعم	Yes نعم	Yes نعم
Agree أوافق	Female أنثى	22	Non-Saudi غير سعودي	King Abdulaziz University, Jeddah. جامعة الملك عبد العزيز، جدة	Radiology الأشعة	intern إنترن	>4.5	It is simulating human attitudes and abilities using computers and technology by teaching machines how humans think, behave, and react toward different situations. هو سلوك وخصائص معينة تتسم بها البرامج الحاسوبية، تجعلها تحاكي القدرات الذهنية البشرية وأنماط عملها.	Social Media (Facebook, Instagram, Snapchat, Tweeter,…). وسائل التواصل الاجتماعي, Internet (web pages, online databases,...). الإنترنت (صفحات الويب، قواعد البيانات، ...), Video games. ألعاب الفيديو, Family members. أفراد الأسرة	Yes- as a personal effort. نعم كرغبة شخصية	Yes نعم	Yes نعم	Yes نعم	No لا	Yes نعم	Yes نعم	Yes نعم	Yes نعم	Do not know لا أعلم	No لا	No لا	No لا
Agree أوافق	Female أنثى	38	Saudi سعودي	King Saud University, Riyadh. جامعة الملك سعود، الرياض	Nursing التمريض	Postgraduate (e.g. MSc. or PhD) دراسات عليا (ماجستير أو دكتوراه)	>4.5	It is simulating human attitudes and abilities using computers and technology by teaching machines how humans think, behave, and react toward different situations. هو سلوك وخصائص معينة تتسم بها البرامج الحاسوبية، تجعلها تحاكي القدرات الذهنية البشرية وأنماط عملها.	Social Media (Facebook, Instagram, Snapchat, Tweeter,…). وسائل التواصل الاجتماعي, Internet (web pages, online databases,...). الإنترنت (صفحات الويب، قواعد البيانات، ...)	No لا	Do not know لا أعلم	Yes نعم	Yes نعم	Do not know لا أعلم	Do not know لا أعلم	Do not know لا أعلم	Do not know لا أعلم	Yes نعم	Yes نعم	Do not know لا أعلم	Do not know لا أعلم	Do not know لا أعلم
Agree أوافق	Female أنثى	40	Saudi سعودي	King Abdulaziz University, Jeddah. جامعة الملك عبد العزيز، جدة	كيمياء حيوي	متخرج	3.5-4	It is simulating human attitudes and abilities using computers and technology by teaching machines how humans think, behave, and react toward different situations. هو سلوك وخصائص معينة تتسم بها البرامج الحاسوبية، تجعلها تحاكي القدرات الذهنية البشرية وأنماط عملها.	Print Media (books, magazines, newspapers). وسائل الإعلام المطبوعة (كتب، مجلات، صحف)., Broadcast Media (TV, Radio). وسائل الإعلام المرئية (تلفزيون ، راديو), Outdoor Media (e.g.Billboards, Transit Ads,..). وسائل الإعلام الخارجية (مثل اللوحات الإعلانية والجدارية،..), Social Media (Facebook, Instagram, Snapchat, Tweeter,…). وسائل التواصل الاجتماعي, Family members. أفراد الأسرة, Friends. أصدقاء	No لا	Yes نعم	Yes نعم	Yes نعم	Yes نعم	Yes نعم	Yes نعم	Yes نعم	Yes نعم	Do not know لا أعلم	Do not know لا أعلم	Do not know لا أعلم	Do not know لا أعلم
Agree أوافق	Female أنثى	27	Saudi سعودي	King Abdulaziz University, Jeddah. جامعة الملك عبد العزيز، جدة	ماجستير التنفيذ التعليم الالكتروني	Postgraduate (e.g. MSc. or PhD) دراسات عليا (ماجستير أو دكتوراه)	4-4.5	It is simulating human attitudes and abilities using computers and technology by teaching machines how humans think, behave, and react toward different situations. هو سلوك وخصائص معينة تتسم بها البرامج الحاسوبية، تجعلها تحاكي القدرات الذهنية البشرية وأنماط عملها.	Academic courses المناهج الدراسية, Print Media (books, magazines, newspapers). وسائل الإعلام المطبوعة (كتب، مجلات، صحف)., Broadcast Media (TV, Radio). وسائل الإعلام المرئية (تلفزيون ، راديو), Outdoor Media (e.g.Billboards, Transit Ads,..). وسائل الإعلام الخارجية (مثل اللوحات الإعلانية والجدارية،..), Social Media (Facebook, Instagram, Snapchat, Tweeter,…). وسائل التواصل الاجتماعي, Internet (web pa…	Yes- as a part of university curriculum. نعم كمنهج دراسي في الجامعة	Yes نعم	Yes نعم	Yes نعم	Yes نعم	Yes نعم	Yes نعم	Yes نعم	Yes نعم	Yes نعم	Yes نعم	Yes نعم	Yes نعم
Agree أوافق	Female أنثى	22	Saudi سعودي	King Abdulaziz University, Jeddah. جامعة الملك عبد العزيز، جدة	تغذية اكلينيكية	3rd year السنة الثالثة	4-4.5	It is simulating human attitudes and abilities using computers and technology by teaching machines how humans think, behave, and react toward different situations. هو سلوك وخصائص معينة تتسم بها البرامج الحاسوبية، تجعلها تحاكي القدرات الذهنية البشرية وأنماط عملها.	Social Media (Facebook, Instagram, Snapchat, Tweeter,…). وسائل التواصل الاجتماعي	No لا	Do not know لا أعلم	Yes نعم	Do not know لا أعلم	Yes نعم	No لا	Do not know لا أعلم	Yes نعم	Yes نعم	No لا	No لا	No لا	No لا
Agree أوافق	Female أنثى	20	Saudi سعودي	King Saud University, Riyadh. جامعة الملك سعود، الرياض	مختبرات اكلينيكيه	2nd year السنة الثانية	>4.5	It is simulating human attitudes and abilities using computers and technology by teaching machines how humans think, behave, and react toward different situations. هو سلوك وخصائص معينة تتسم بها البرامج الحاسوبية، تجعلها تحاكي القدرات الذهنية البشرية وأنماط عملها.	Academic courses المناهج الدراسية, Broadcast Media (TV, Radio). وسائل الإعلام المرئية (تلفزيون ، راديو), Social Media (Facebook, Instagram, Snapchat, Tweeter,…). وسائل التواصل الاجتماعي, Video games. ألعاب الفيديو	No لا	Do not know لا أعلم	Yes نعم	Yes نعم	Yes نعم	Yes نعم	Do not know لا أعلم	No لا	No لا	Yes نعم	Yes نعم	Yes نعم	Yes نعم
Agree أوافق	Female أنثى	21	Saudi سعودي	King Saud University, Riyadh. جامعة الملك سعود، الرياض	مختبرات طبية	3rd year السنة الثالثة	3.5-4	It is a medical dictionary used by healthcare consumers, students, and professionals. إنه قاموس طبي يستخدمه جمهور الرعاية الصحية والطلاب والمهنيون.	Academic courses المناهج الدراسية, Print Media (books, magazines, newspapers). وسائل الإعلام المطبوعة (كتب، مجلات، صحف)., Broadcast Media (TV, Radio). وسائل الإعلام المرئية (تلفزيون ، راديو), Social Media (Facebook, Instagram, Snapchat, Tweeter,…). وسائل التواصل الاجتماعي	No لا	Yes نعم	Yes نعم	Yes نعم	Yes نعم	Yes نعم	Do not know لا أعلم	No لا	No لا	No لا	Do not know لا أعلم	Do not know لا أعلم	Do not know لا أعلم
Agree أوافق	Female أنثى	21	Saudi سعودي	King Saud University, Riyadh. جامعة الملك سعود، الرياض	علوم مختبرات	2nd year السنة الثانية	4-4.5	It is simulating human attitudes and abilities using computers and technology by teaching machines how humans think, behave, and react toward different situations. هو سلوك وخصائص معينة تتسم بها البرامج الحاسوبية، تجعلها تحاكي القدرات الذهنية البشرية وأنماط عملها.	Print Media (books, magazines, newspapers). وسائل الإعلام المطبوعة (كتب، مجلات، صحف)., Social Media (Facebook, Instagram, Snapchat, Tweeter,…). وسائل التواصل الاجتماعي, Internet (web pages, online databases,...). الإنترنت (صفحات الويب، قواعد البيانات، ...)	No لا	Do not know لا أعلم	No لا	Do not know لا أعلم	Yes نعم	Yes نعم	Yes نعم	Do not know لا أعلم	No لا	No لا	No لا	No لا	Yes نعم
Agree أوافق	Female أنثى	20	Saudi سعودي	King Saud University, Riyadh. جامعة الملك سعود، الرياض	مختبرات طبية	3rd year السنة الثالثة	3.5-4	It is simulating human attitudes and abilities using computers and technology by teaching machines how humans think, behave, and react toward different situations. هو سلوك وخصائص معينة تتسم بها البرامج الحاسوبية، تجعلها تحاكي القدرات الذهنية البشرية وأنماط عملها.	Broadcast Media (TV, Radio). وسائل الإعلام المرئية (تلفزيون ، راديو), Outdoor Media (e.g.Billboards, Transit Ads,..). وسائل الإعلام الخارجية (مثل اللوحات الإعلانية والجدارية،..), Social Media (Facebook, Instagram, Snapchat, Tweeter,…). وسائل التواصل الاجتماعي, Internet (web pages, online databases,...). الإنترنت (صفحات الويب، قواعد البيانات، ...), Video games. ألعاب الفيديو, Family members. أفراد…	No لا	Yes نعم	Yes نعم	No لا	No لا	Yes نعم	Yes نعم	Yes نعم	Yes نعم	No لا	No لا	No لا	No لا
Agree أوافق	Female أنثى	21	Saudi سعودي	King Saud University, Riyadh. جامعة الملك سعود، الرياض	مختبرات طبية	3rd year السنة الثالثة	>4.5	It is simulating human attitudes and abilities using computers and technology by teaching machines how humans think, behave, and react toward different situations. هو سلوك وخصائص معينة تتسم بها البرامج الحاسوبية، تجعلها تحاكي القدرات الذهنية البشرية وأنماط عملها.	Academic courses المناهج الدراسية, Internet (web pages, online databases,...). الإنترنت (صفحات الويب، قواعد البيانات، ...)	No لا	Yes نعم	Do not know لا أعلم	Yes نعم	No لا	Yes نعم	Yes نعم	Do not know لا أعلم	Yes نعم	Yes نعم	Yes نعم	Do not know لا أعلم	Do not know لا أعلم
Agree أوافق	Female أنثى	20	Saudi سعودي	King Saud University, Riyadh. جامعة الملك سعود، الرياض	مختبرات طبية	3rd year السنة الثالثة	4-4.5	It is simulating human attitudes and abilities using computers and technology by teaching machines how humans think, behave, and react toward different situations. هو سلوك وخصائص معينة تتسم بها البرامج الحاسوبية، تجعلها تحاكي القدرات الذهنية البشرية وأنماط عملها.	Print Media (books, magazines, newspapers). وسائل الإعلام المطبوعة (كتب، مجلات، صحف)., Social Media (Facebook, Instagram, Snapchat, Tweeter,…). وسائل التواصل الاجتماعي, Internet (web pages, online databases,...). الإنترنت (صفحات الويب، قواعد البيانات، ...)	No لا	Yes نعم	Yes نعم	Yes نعم	Yes نعم	No لا	Yes نعم	Yes نعم	Yes نعم	Do not know لا أعلم	Yes نعم	No لا	Do not know لا أعلم
Agree أوافق	Female أنثى	19	Saudi سعودي	King Saud University, Riyadh. جامعة الملك سعود، الرياض	Healthcare Administration الإدارة الصحية	1st year السنة الأولى	≤3.5	It is simulating human attitudes and abilities using computers and technology by teaching machines how humans think, behave, and react toward different situations. هو سلوك وخصائص معينة تتسم بها البرامج الحاسوبية، تجعلها تحاكي القدرات الذهنية البشرية وأنماط عملها.	Academic courses المناهج الدراسية, Broadcast Media (TV, Radio). وسائل الإعلام المرئية (تلفزيون ، راديو), Social Media (Facebook, Instagram, Snapchat, Tweeter,…). وسائل التواصل الاجتماعي, Internet (web pages, online databases,...). الإنترنت (صفحات الويب، قواعد البيانات، ...), Family members. أفراد الأسرة, Friends. أصدقاء	Yes- as a part of university curriculum. نعم كمنهج دراسي في الجامعة	Yes نعم	Do not know لا أعلم	Yes نعم	Yes نعم	Do not know لا أعلم	Do not know لا أعلم	No لا	Yes نعم	No لا	Do not know لا أعلم	Yes نعم	Do not know لا أعلم
Agree أوافق	Female أنثى	23	Saudi سعودي	King Saud University, Riyadh. جامعة الملك سعود، الرياض	Clinical laboratory مختبرات طبية	3rd year السنة الثالثة	4-4.5	It is simulating human attitudes and abilities using computers and technology by teaching machines how humans think, behave, and react toward different situations. هو سلوك وخصائص معينة تتسم بها البرامج الحاسوبية، تجعلها تحاكي القدرات الذهنية البشرية وأنماط عملها.	Social Media (Facebook, Instagram, Snapchat, Tweeter,…). وسائل التواصل الاجتماعي, Internet (web pages, online databases,...). الإنترنت (صفحات الويب، قواعد البيانات، ...), Family members. أفراد الأسرة	No لا	Yes نعم	Yes نعم	Do not know لا أعلم	No لا	Yes نعم	Do not know لا أعلم	No لا	Yes نعم	Yes نعم	No لا	Yes نعم	No لا
Agree أوافق	Female أنثى	20	Saudi سعودي	King Faisal University, Riyadh. جامعة الملك فيصل، الرياض	مختبرات	3rd year السنة الثالثة	4-4.5	It is simulating human attitudes and abilities using computers and technology by teaching machines how humans think, behave, and react toward different situations. هو سلوك وخصائص معينة تتسم بها البرامج الحاسوبية، تجعلها تحاكي القدرات الذهنية البشرية وأنماط عملها.	Social Media (Facebook, Instagram, Snapchat, Tweeter,…). وسائل التواصل الاجتماعي	No لا	Yes نعم	Yes نعم	Yes نعم	No لا	No لا	Do not know لا أعلم	No لا	No لا	Yes نعم	Yes نعم	Yes نعم	Yes نعم
Agree أوافق	Female أنثى	19	Saudi سعودي	King Saud University, Riyadh. جامعة الملك سعود، الرياض	مختبرات	3rd year السنة الثالثة	>4.5	It is simulating human attitudes and abilities using computers and technology by teaching machines how humans think, behave, and react toward different situations. هو سلوك وخصائص معينة تتسم بها البرامج الحاسوبية، تجعلها تحاكي القدرات الذهنية البشرية وأنماط عملها.	Academic courses المناهج الدراسية, Print Media (books, magazines, newspapers). وسائل الإعلام المطبوعة (كتب، مجلات، صحف)., Broadcast Media (TV, Radio). وسائل الإعلام المرئية (تلفزيون ، راديو), Outdoor Media (e.g.Billboards, Transit Ads,..). وسائل الإعلام الخارجية (مثل اللوحات الإعلانية والجدارية،..), Social Media (Facebook, Instagram, Snapchat, Tweeter,…). وسائل التواصل الاجتماعي, Internet (web pa…	No لا	Yes نعم	Yes نعم	Yes نعم	Yes نعم	Yes نعم	Yes نعم	Yes نعم	Yes نعم	Do not know لا أعلم	Do not know لا أعلم	Yes نعم	Yes نعم
Agree أوافق	Female أنثى	24	Saudi سعودي	جامعة الامام عبدالرحمن بن فيصل، الدمام	تقنية قلب	خريجة درجة البكالوريوس	4-4.5	It is simulating human attitudes and abilities using computers and technology by teaching machines how humans think, behave, and react toward different situations. هو سلوك وخصائص معينة تتسم بها البرامج الحاسوبية، تجعلها تحاكي القدرات الذهنية البشرية وأنماط عملها.	Broadcast Media (TV, Radio). وسائل الإعلام المرئية (تلفزيون ، راديو), Social Media (Facebook, Instagram, Snapchat, Tweeter,…). وسائل التواصل الاجتماعي, Internet (web pages, online databases,...). الإنترنت (صفحات الويب، قواعد البيانات، ...)	No لا	Yes نعم	Yes نعم	Yes نعم	Yes نعم	Do not know لا أعلم	Yes نعم	No لا	Yes نعم	No لا	No لا	No لا	No لا
Agree أوافق	Female أنثى	24	Saudi سعودي	Alexandria	Medicine الطب	5th year السنة الخامسة	4-4.5	It is simulating human attitudes and abilities using computers and technology by teaching machines how humans think, behave, and react toward different situations. هو سلوك وخصائص معينة تتسم بها البرامج الحاسوبية، تجعلها تحاكي القدرات الذهنية البشرية وأنماط عملها.	Print Media (books, magazines, newspapers). وسائل الإعلام المطبوعة (كتب، مجلات، صحف)., Broadcast Media (TV, Radio). وسائل الإعلام المرئية (تلفزيون ، راديو), Social Media (Facebook, Instagram, Snapchat, Tweeter,…). وسائل التواصل الاجتماعي, Internet (web pages, online databases,...). الإنترنت (صفحات الويب، قواعد البيانات، ...), Video games. ألعاب الفيديو, Family members. أفراد الأسرة	No لا	Yes نعم	Yes نعم	Yes نعم	No لا	Yes نعم	Yes نعم	No لا	Yes نعم	No لا	Yes نعم	Yes نعم	Yes نعم
Agree أوافق	Female أنثى	43	Saudi سعودي	King Abdulaziz University, Jeddah. جامعة الملك عبد العزيز، جدة	Dentistry طب الأسنان	Postgraduate (e.g. MSc. or PhD) دراسات عليا (ماجستير أو دكتوراه)	4-4.5	It is simulating human attitudes and abilities using computers and technology by teaching machines how humans think, behave, and react toward different situations. هو سلوك وخصائص معينة تتسم بها البرامج الحاسوبية، تجعلها تحاكي القدرات الذهنية البشرية وأنماط عملها.	Broadcast Media (TV, Radio). وسائل الإعلام المرئية (تلفزيون ، راديو), Internet (web pages, online databases,...). الإنترنت (صفحات الويب، قواعد البيانات، ...), Friends. أصدقاء	No لا	Yes نعم	Yes نعم	Yes نعم	Do not know لا أعلم	Yes نعم	Do not know لا أعلم	Yes نعم	Yes نعم	No لا	No لا	No لا	No لا
Agree أوافق	Female أنثى	23	Saudi سعودي	اسكندرية	Medicine الطب	intern إنترن	≤3.5	It is simulating human attitudes and abilities using computers and technology by teaching machines how humans think, behave, and react toward different situations. هو سلوك وخصائص معينة تتسم بها البرامج الحاسوبية، تجعلها تحاكي القدرات الذهنية البشرية وأنماط عملها.	Print Media (books, magazines, newspapers). وسائل الإعلام المطبوعة (كتب، مجلات، صحف)., Internet (web pages, online databases,...). الإنترنت (صفحات الويب، قواعد البيانات، ...)	No لا	Yes نعم	Yes نعم	Yes نعم	Yes نعم	Yes نعم	No لا	No لا	Yes نعم	No لا	No لا	Yes نعم	Yes نعم
Agree أوافق	Female أنثى	24	Saudi سعودي	Alfaisal University- riyadh	Medicine الطب	intern إنترن	≤3.5	It is simulating human attitudes and abilities using computers and technology by teaching machines how humans think, behave, and react toward different situations. هو سلوك وخصائص معينة تتسم بها البرامج الحاسوبية، تجعلها تحاكي القدرات الذهنية البشرية وأنماط عملها.	Academic courses المناهج الدراسية, Print Media (books, magazines, newspapers). وسائل الإعلام المطبوعة (كتب، مجلات، صحف)., Broadcast Media (TV, Radio). وسائل الإعلام المرئية (تلفزيون ، راديو), Outdoor Media (e.g.Billboards, Transit Ads,..). وسائل الإعلام الخارجية (مثل اللوحات الإعلانية والجدارية،..), Social Media (Facebook, Instagram, Snapchat, Tweeter,…). وسائل التواصل الاجتماعي, Internet (web pa…	No لا	Yes نعم	Yes نعم	Yes نعم	No لا	Yes نعم	Yes نعم	No لا	No لا	Yes نعم	Yes نعم	Yes نعم	Yes نعم
Agree أوافق	Female أنثى	20	Saudi سعودي	جامعة دار العلوم. Dar Al Uloom University	Medicine الطب	1st year السنة الأولى	>4.5	It is simulating human attitudes and abilities using computers and technology by teaching machines how humans think, behave, and react toward different situations. هو سلوك وخصائص معينة تتسم بها البرامج الحاسوبية، تجعلها تحاكي القدرات الذهنية البشرية وأنماط عملها.	Social Media (Facebook, Instagram, Snapchat, Tweeter,…). وسائل التواصل الاجتماعي, Internet (web pages, online databases,...). الإنترنت (صفحات الويب، قواعد البيانات، ...), Family members. أفراد الأسرة, Friends. أصدقاء	No لا	Yes نعم	Yes نعم	Yes نعم	Do not know لا أعلم	No لا	Yes نعم	No لا	Yes نعم	Do not know لا أعلم	No لا	No لا	No لا
Agree أوافق	Male ذكر	70	Saudi سعودي	Batterjee Medical College, Jeddah. كلية البترجي الطبية، جدة	متقاعد	Postgraduate (e.g. MSc. or PhD) دراسات عليا (ماجستير أو دكتوراه)	≤3.5	It is simulating human attitudes and abilities using computers and technology by teaching machines how humans think, behave, and react toward different situations. هو سلوك وخصائص معينة تتسم بها البرامج الحاسوبية، تجعلها تحاكي القدرات الذهنية البشرية وأنماط عملها.	Broadcast Media (TV, Radio). وسائل الإعلام المرئية (تلفزيون ، راديو), Social Media (Facebook, Instagram, Snapchat, Tweeter,…). وسائل التواصل الاجتماعي, Video games. ألعاب الفيديو	No لا	Yes نعم	Yes نعم	Yes نعم	Do not know لا أعلم	Do not know لا أعلم	Do not know لا أعلم	Yes نعم	Yes نعم	No لا	Do not know لا أعلم	Do not know لا أعلم	Do not know لا أعلم
Agree أوافق	Female أنثى	24	Saudi سعودي	Imam Abdulrahman Bin Faisal University	Cardiovascular Technology	Fresh graduate	>4.5	It is simulating human attitudes and abilities using computers and technology by teaching machines how humans think, behave, and react toward different situations. هو سلوك وخصائص معينة تتسم بها البرامج الحاسوبية، تجعلها تحاكي القدرات الذهنية البشرية وأنماط عملها.	Coursera	Yes- as a personal effort. نعم كرغبة شخصية	Yes نعم	Yes نعم	Yes نعم	Yes نعم	No لا	Yes نعم	Yes نعم	Yes نعم	Yes نعم	Do not know لا أعلم	Yes نعم	Do not know لا أعلم
Agree أوافق	Female أنثى	25	Saudi سعودي	كلية طب القصر العيني	Medicine الطب	4th year السنة الرابعة	≤3.5	It is simulating human attitudes and abilities using computers and technology by teaching machines how humans think, behave, and react toward different situations. هو سلوك وخصائص معينة تتسم بها البرامج الحاسوبية، تجعلها تحاكي القدرات الذهنية البشرية وأنماط عملها.	Academic courses المناهج الدراسية, Broadcast Media (TV, Radio). وسائل الإعلام المرئية (تلفزيون ، راديو), Outdoor Media (e.g.Billboards, Transit Ads,..). وسائل الإعلام الخارجية (مثل اللوحات الإعلانية والجدارية،..), Social Media (Facebook, Instagram, Snapchat, Tweeter,…). وسائل التواصل الاجتماعي	No لا	Do not know لا أعلم	Yes نعم	Yes نعم	No لا	Yes نعم	Yes نعم	Yes نعم	Yes نعم	No لا	Do not know لا أعلم	Do not know لا أعلم	Do not know لا أعلم
Agree أوافق	Male ذكر	42	Saudi سعودي	معهد الادارة العامة بالرياض	Medical administration	خريج	≤3.5	It is simulating human attitudes and abilities using computers and technology by teaching machines how humans think, behave, and react toward different situations. هو سلوك وخصائص معينة تتسم بها البرامج الحاسوبية، تجعلها تحاكي القدرات الذهنية البشرية وأنماط عملها.	Print Media (books, magazines, newspapers). وسائل الإعلام المطبوعة (كتب، مجلات، صحف)., Broadcast Media (TV, Radio). وسائل الإعلام المرئية (تلفزيون ، راديو), Outdoor Media (e.g.Billboards, Transit Ads,..). وسائل الإعلام الخارجية (مثل اللوحات الإعلانية والجدارية،..), Social Media (Facebook, Instagram, Snapchat, Tweeter,…). وسائل التواصل الاجتماعي, Internet (web pages, online databases,...). الإنترن…	No لا	Yes نعم	Yes نعم	Do not know لا أعلم	Yes نعم	Yes نعم	Yes نعم	No لا	Yes نعم	No لا	No لا	No لا	No لا
Agree أوافق	Female أنثى	18	Saudi سعودي	جامعة الأمام عبدالرحمن بن فيصل	Medicine الطب	1st year السنة الأولى	>4.5	It is simulating human attitudes and abilities using computers and technology by teaching machines how humans think, behave, and react toward different situations. هو سلوك وخصائص معينة تتسم بها البرامج الحاسوبية، تجعلها تحاكي القدرات الذهنية البشرية وأنماط عملها.	Academic courses المناهج الدراسية, Broadcast Media (TV, Radio). وسائل الإعلام المرئية (تلفزيون ، راديو), Social Media (Facebook, Instagram, Snapchat, Tweeter,…). وسائل التواصل الاجتماعي, Family members. أفراد الأسرة, Friends. أصدقاء	No لا	Yes نعم	Yes نعم	Do not know لا أعلم	No لا	Yes نعم	Yes نعم	No لا	Yes نعم	Do not know لا أعلم	No لا	No لا	No لا
Agree أوافق	Female أنثى	27	Saudi سعودي	Riyadh Elm University	Dentistry طب الأسنان	Postgraduate (e.g. MSc. or PhD) دراسات عليا (ماجستير أو دكتوراه)	>4.5	It is simulating human attitudes and abilities using computers and technology by teaching machines how humans think, behave, and react toward different situations. هو سلوك وخصائص معينة تتسم بها البرامج الحاسوبية، تجعلها تحاكي القدرات الذهنية البشرية وأنماط عملها.	Broadcast Media (TV, Radio). وسائل الإعلام المرئية (تلفزيون ، راديو), Internet (web pages, online databases,...). الإنترنت (صفحات الويب، قواعد البيانات، ...)	Yes- as a personal effort. نعم كرغبة شخصية	Yes نعم	Yes نعم	Yes نعم	Do not know لا أعلم	Yes نعم	Yes نعم	Do not know لا أعلم	Yes نعم	Yes نعم	Do not know لا أعلم	Do not know لا أعلم	Do not know لا أعلم
Agree أوافق	Female أنثى	19	Non-Saudi غير سعودي	جامعة الملك سعود للعلوم الصحيه في جدة	Preparatory Year السنة التحضيرية	Preparatory Year السنة التحضيرية	4-4.5	It is simulating human attitudes and abilities using computers and technology by teaching machines how humans think, behave, and react toward different situations. هو سلوك وخصائص معينة تتسم بها البرامج الحاسوبية، تجعلها تحاكي القدرات الذهنية البشرية وأنماط عملها.	Social Media (Facebook, Instagram, Snapchat, Tweeter,…). وسائل التواصل الاجتماعي, Internet (web pages, online databases,...). الإنترنت (صفحات الويب، قواعد البيانات، ...)	No لا	Yes نعم	Do not know لا أعلم	Yes نعم	No لا	Yes نعم	No لا	Yes نعم	Yes نعم	No لا	Yes نعم	Do not know لا أعلم	Yes نعم
Agree أوافق	Female أنثى	24	Saudi سعودي	Jazan University, Jazan. جامعة جازان، جازان	Dentistry طب الأسنان	intern إنترن	4-4.5	It is a type of medical drug used to improve intelligence, but it causes side effects such as skin rashes. هو نوع من الأدوية الطبية يستخدم لتحسين الذكاء ، لكنه يسبب آثارًا جانبية مثل الطفح الجلدي	Print Media (books, magazines, newspapers). وسائل الإعلام المطبوعة (كتب، مجلات، صحف).	Yes- as a personal effort. نعم كرغبة شخصية	Yes نعم	Yes نعم	Yes نعم	Yes نعم	Yes نعم	Do not know لا أعلم	Yes نعم	Yes نعم	No لا	No لا	Do not know لا أعلم	Yes نعم
Agree أوافق	Female أنثى	26	Saudi سعودي	Jazan University, Jazan. جامعة جازان، جازان	Dentistry طب الأسنان	intern إنترن	≤3.5	It is simulating human attitudes and abilities using computers and technology by teaching machines how humans think, behave, and react toward different situations. هو سلوك وخصائص معينة تتسم بها البرامج الحاسوبية، تجعلها تحاكي القدرات الذهنية البشرية وأنماط عملها.	Academic courses المناهج الدراسية, Social Media (Facebook, Instagram, Snapchat, Tweeter,…). وسائل التواصل الاجتماعي, Internet (web pages, online databases,...). الإنترنت (صفحات الويب، قواعد البيانات، ...)	No لا	Yes نعم	Yes نعم	Yes نعم	Yes نعم	Do not know لا أعلم	Yes نعم	Yes نعم	Yes نعم	Do not know لا أعلم	Do not know لا أعلم	Do not know لا أعلم	Do not know لا أعلم
Agree أوافق	Female أنثى	21	Saudi سعودي	King Saud University, Riyadh. جامعة الملك سعود، الرياض	Pharmacy الصيدلة	4th year السنة الرابعة	>4.5	It is simulating human attitudes and abilities using computers and technology by teaching machines how humans think, behave, and react toward different situations. هو سلوك وخصائص معينة تتسم بها البرامج الحاسوبية، تجعلها تحاكي القدرات الذهنية البشرية وأنماط عملها.	Social Media (Facebook, Instagram, Snapchat, Tweeter,…). وسائل التواصل الاجتماعي, Internet (web pages, online databases,...). الإنترنت (صفحات الويب، قواعد البيانات، ...)	No لا	Yes نعم	Yes نعم	Yes نعم	Yes نعم	Yes نعم	Yes نعم	Yes نعم	Yes نعم	No لا	Do not know لا أعلم	No لا	Yes نعم
Agree أوافق	Female أنثى	22	Saudi سعودي	King Saud University, Riyadh. جامعة الملك سعود، الرياض	Pharmacy الصيدلة	3rd year السنة الثالثة	>4.5	It is simulating human attitudes and abilities using computers and technology by teaching machines how humans think, behave, and react toward different situations. هو سلوك وخصائص معينة تتسم بها البرامج الحاسوبية، تجعلها تحاكي القدرات الذهنية البشرية وأنماط عملها.	Broadcast Media (TV, Radio). وسائل الإعلام المرئية (تلفزيون ، راديو), Social Media (Facebook, Instagram, Snapchat, Tweeter,…). وسائل التواصل الاجتماعي, Video games. ألعاب الفيديو	No لا	Yes نعم	Yes نعم	Yes نعم	Yes نعم	Yes نعم	Yes نعم	Yes نعم	Yes نعم	Yes نعم	No لا	No لا	Yes نعم
Agree أوافق	Female أنثى	21	Saudi سعودي	King Saud University, Riyadh. جامعة الملك سعود، الرياض	Pharmacy الصيدلة	3rd year السنة الثالثة	4-4.5	It is simulating human attitudes and abilities using computers and technology by teaching machines how humans think, behave, and react toward different situations. هو سلوك وخصائص معينة تتسم بها البرامج الحاسوبية، تجعلها تحاكي القدرات الذهنية البشرية وأنماط عملها.	Academic courses المناهج الدراسية	No لا	No لا	Do not know لا أعلم	Do not know لا أعلم	Do not know لا أعلم	Do not know لا أعلم	Do not know لا أعلم	Do not know لا أعلم	Do not know لا أعلم	Do not know لا أعلم	Do not know لا أعلم	Do not know لا أعلم	Do not know لا أعلم
Agree أوافق	Female أنثى	20	Saudi سعودي	King Saud University, Riyadh. جامعة الملك سعود، الرياض	Pharmacy الصيدلة	4th year السنة الرابعة	4-4.5	It is simulating human attitudes and abilities using computers and technology by teaching machines how humans think, behave, and react toward different situations. هو سلوك وخصائص معينة تتسم بها البرامج الحاسوبية، تجعلها تحاكي القدرات الذهنية البشرية وأنماط عملها.	Academic courses المناهج الدراسية, Broadcast Media (TV, Radio). وسائل الإعلام المرئية (تلفزيون ، راديو), Social Media (Facebook, Instagram, Snapchat, Tweeter,…). وسائل التواصل الاجتماعي, Friends. أصدقاء	No لا	Yes نعم	No لا	No لا	Do not know لا أعلم	No لا	Do not know لا أعلم	No لا	No لا	No لا	Do not know لا أعلم	Yes نعم	No لا
Agree أوافق	Female أنثى	21	Saudi سعودي	جامعة الحرس	Medicine الطب	4th year السنة الرابعة	>4.5	It is simulating human attitudes and abilities using computers and technology by teaching machines how humans think, behave, and react toward different situations. هو سلوك وخصائص معينة تتسم بها البرامج الحاسوبية، تجعلها تحاكي القدرات الذهنية البشرية وأنماط عملها.	Social Media (Facebook, Instagram, Snapchat, Tweeter,…). وسائل التواصل الاجتماعي	No لا	Yes نعم	Yes نعم	Yes نعم	Yes نعم	Yes نعم	Yes نعم	Yes نعم	Yes نعم	No لا	No لا	No لا	No لا
Agree أوافق	Female أنثى	21	Saudi سعودي	King Saud University, Riyadh. جامعة الملك سعود، الرياض	تغذيه اكلينيكيه	4th year السنة الرابعة	>4.5	It is simulating human attitudes and abilities using computers and technology by teaching machines how humans think, behave, and react toward different situations. هو سلوك وخصائص معينة تتسم بها البرامج الحاسوبية، تجعلها تحاكي القدرات الذهنية البشرية وأنماط عملها.	Social Media (Facebook, Instagram, Snapchat, Tweeter,…). وسائل التواصل الاجتماعي, Internet (web pages, online databases,...). الإنترنت (صفحات الويب، قواعد البيانات، ...), Family members. أفراد الأسرة	No لا	Yes نعم	Yes نعم	Yes نعم	Do not know لا أعلم	Yes نعم	Yes نعم	Yes نعم	Yes نعم	Do not know لا أعلم	Yes نعم	No لا	Yes نعم
Agree أوافق	Female أنثى	21	Saudi سعودي	King Saud University, Riyadh. جامعة الملك سعود، الرياض	التغذية السريرية Clinical Nutrition	3rd year السنة الثالثة	3.5-4	It is simulating human attitudes and abilities using computers and technology by teaching machines how humans think, behave, and react toward different situations. هو سلوك وخصائص معينة تتسم بها البرامج الحاسوبية، تجعلها تحاكي القدرات الذهنية البشرية وأنماط عملها.	Social Media (Facebook, Instagram, Snapchat, Tweeter,…). وسائل التواصل الاجتماعي, Family members. أفراد الأسرة, Friends. أصدقاء	No لا	Yes نعم	Yes نعم	Yes نعم	No لا	Yes نعم	Yes نعم	Do not know لا أعلم	No لا	No لا	Do not know لا أعلم	Do not know لا أعلم	Do not know لا أعلم
Agree أوافق	Female أنثى	20	Saudi سعودي	King Saud University, Riyadh. جامعة الملك سعود، الرياض	Pharmacy الصيدلة	5th year السنة الخامسة	>4.5	It is simulating human attitudes and abilities using computers and technology by teaching machines how humans think, behave, and react toward different situations. هو سلوك وخصائص معينة تتسم بها البرامج الحاسوبية، تجعلها تحاكي القدرات الذهنية البشرية وأنماط عملها.	Broadcast Media (TV, Radio). وسائل الإعلام المرئية (تلفزيون ، راديو), Outdoor Media (e.g.Billboards, Transit Ads,..). وسائل الإعلام الخارجية (مثل اللوحات الإعلانية والجدارية،..), Social Media (Facebook, Instagram, Snapchat, Tweeter,…). وسائل التواصل الاجتماعي, Internet (web pages, online databases,...). الإنترنت (صفحات الويب، قواعد البيانات، ...), Family members. أفراد الأسرة, Friends. أصدقاء	No لا	Yes نعم	Yes نعم	Yes نعم	Yes نعم	Yes نعم	Yes نعم	No لا	Yes نعم	No لا	No لا	No لا	No لا
Agree أوافق	Female أنثى	21	Saudi سعودي	King Saud University, Riyadh. جامعة الملك سعود، الرياض	Pharmacy الصيدلة	4th year السنة الرابعة	>4.5	It is simulating human attitudes and abilities using computers and technology by teaching machines how humans think, behave, and react toward different situations. هو سلوك وخصائص معينة تتسم بها البرامج الحاسوبية، تجعلها تحاكي القدرات الذهنية البشرية وأنماط عملها.	Broadcast Media (TV, Radio). وسائل الإعلام المرئية (تلفزيون ، راديو), Social Media (Facebook, Instagram, Snapchat, Tweeter,…). وسائل التواصل الاجتماعي, Internet (web pages, online databases,...). الإنترنت (صفحات الويب، قواعد البيانات، ...)	No لا	Yes نعم	Yes نعم	Do not know لا أعلم	Yes نعم	Yes نعم	Yes نعم	Yes نعم	Yes نعم	No لا	Yes نعم	Yes نعم	No لا
Agree أوافق	Male ذكر	21	Saudi سعودي	King Saud University, Riyadh. جامعة الملك سعود، الرياض	Pharmacy الصيدلة	3rd year السنة الثالثة	3.5-4	It is simulating human attitudes and abilities using computers and technology by teaching machines how humans think, behave, and react toward different situations. هو سلوك وخصائص معينة تتسم بها البرامج الحاسوبية، تجعلها تحاكي القدرات الذهنية البشرية وأنماط عملها.	Broadcast Media (TV, Radio). وسائل الإعلام المرئية (تلفزيون ، راديو), Social Media (Facebook, Instagram, Snapchat, Tweeter,…). وسائل التواصل الاجتماعي, Friends. أصدقاء	No لا	Yes نعم	Yes نعم	Yes نعم	Do not know لا أعلم	Yes نعم	Yes نعم	Do not know لا أعلم	Yes نعم	Do not know لا أعلم	Do not know لا أعلم	Do not know لا أعلم	Do not know لا أعلم
Agree أوافق	Female أنثى	24	Saudi سعودي	Jazan University, Jazan. جامعة جازان، جازان	Dentistry طب الأسنان	intern إنترن	3.5-4	It is simulating human attitudes and abilities using computers and technology by teaching machines how humans think, behave, and react toward different situations. هو سلوك وخصائص معينة تتسم بها البرامج الحاسوبية، تجعلها تحاكي القدرات الذهنية البشرية وأنماط عملها.	Social Media (Facebook, Instagram, Snapchat, Tweeter,…). وسائل التواصل الاجتماعي, Family members. أفراد الأسرة	No لا	Yes نعم	Yes نعم	Yes نعم	Yes نعم	Yes نعم	Yes نعم	Yes نعم	Yes نعم	No لا	Do not know لا أعلم	Do not know لا أعلم	Do not know لا أعلم
Agree أوافق	Female أنثى	24	Saudi سعودي	Jazan University, Jazan. جامعة جازان، جازان	Medicine الطب	intern إنترن	4-4.5	It is simulating human attitudes and abilities using computers and technology by teaching machines how humans think, behave, and react toward different situations. هو سلوك وخصائص معينة تتسم بها البرامج الحاسوبية، تجعلها تحاكي القدرات الذهنية البشرية وأنماط عملها.	Print Media (books, magazines, newspapers). وسائل الإعلام المطبوعة (كتب، مجلات، صحف)., Social Media (Facebook, Instagram, Snapchat, Tweeter,…). وسائل التواصل الاجتماعي, Friends. أصدقاء	No لا	Yes نعم	Yes نعم	Yes نعم	Yes نعم	Yes نعم	Yes نعم	No لا	No لا	No لا	Do not know لا أعلم	Do not know لا أعلم	Do not know لا أعلم
Agree أوافق	Male ذكر	21	Saudi سعودي	University College Dublin	Medicine الطب	3rd year السنة الثالثة	4-4.5	It is simulating human attitudes and abilities using computers and technology by teaching machines how humans think, behave, and react toward different situations. هو سلوك وخصائص معينة تتسم بها البرامج الحاسوبية، تجعلها تحاكي القدرات الذهنية البشرية وأنماط عملها.	Academic courses المناهج الدراسية, Social Media (Facebook, Instagram, Snapchat, Tweeter,…). وسائل التواصل الاجتماعي, Family members. أفراد الأسرة, Friends. أصدقاء	No لا	Yes نعم	Yes نعم	Yes نعم	No لا	Do not know لا أعلم	Yes نعم	No لا	Yes نعم	Yes نعم	No لا	No لا	No لا
Agree أوافق	Female أنثى	22	Saudi سعودي	King Abdulaziz University, Jeddah. جامعة الملك عبد العزيز، جدة	مختبرات	intern إنترن	4-4.5	It is simulating human attitudes and abilities using computers and technology by teaching machines how humans think, behave, and react toward different situations. هو سلوك وخصائص معينة تتسم بها البرامج الحاسوبية، تجعلها تحاكي القدرات الذهنية البشرية وأنماط عملها.	Social Media (Facebook, Instagram, Snapchat, Tweeter,…). وسائل التواصل الاجتماعي, Internet (web pages, online databases,...). الإنترنت (صفحات الويب، قواعد البيانات، ...)	No لا	Yes نعم	Yes نعم	Do not know لا أعلم	Do not know لا أعلم	Yes نعم	Yes نعم	No لا	Do not know لا أعلم	Yes نعم	No لا	No لا	No لا
Agree أوافق	Female أنثى	30	Saudi سعودي	King Abdulaziz University, Jeddah. جامعة الملك عبد العزيز، جدة	مختبرات طبية	متخرجة بكالوريوس	4-4.5	It is simulating human attitudes and abilities using computers and technology by teaching machines how humans think, behave, and react toward different situations. هو سلوك وخصائص معينة تتسم بها البرامج الحاسوبية، تجعلها تحاكي القدرات الذهنية البشرية وأنماط عملها.	Broadcast Media (TV, Radio). وسائل الإعلام المرئية (تلفزيون ، راديو), Internet (web pages, online databases,...). الإنترنت (صفحات الويب، قواعد البيانات، ...), Family members. أفراد الأسرة, Friends. أصدقاء	No لا	Yes نعم	Yes نعم	Yes نعم	Do not know لا أعلم	Yes نعم	Yes نعم	Yes نعم	Yes نعم	No لا	No لا	No لا	No لا
Agree أوافق	Male ذكر	19	Saudi سعودي	University college dublin	Medicine الطب	1st year السنة الأولى	4-4.5	It is simulating human attitudes and abilities using computers and technology by teaching machines how humans think, behave, and react toward different situations. هو سلوك وخصائص معينة تتسم بها البرامج الحاسوبية، تجعلها تحاكي القدرات الذهنية البشرية وأنماط عملها.	Academic courses المناهج الدراسية, Social Media (Facebook, Instagram, Snapchat, Tweeter,…). وسائل التواصل الاجتماعي, Family members. أفراد الأسرة, Friends. أصدقاء	No لا	Yes نعم	Yes نعم	Yes نعم	Yes نعم	Yes نعم	Yes نعم	Yes نعم	Yes نعم	Yes نعم	No لا	No لا	No لا
Agree أوافق	Female أنثى	32	Saudi سعودي	Arap development	Nursing التمريض	Moh	3.5-4	It is simulating human attitudes and abilities using computers and technology by teaching machines how humans think, behave, and react toward different situations. هو سلوك وخصائص معينة تتسم بها البرامج الحاسوبية، تجعلها تحاكي القدرات الذهنية البشرية وأنماط عملها.	Social Media (Facebook, Instagram, Snapchat, Tweeter,…). وسائل التواصل الاجتماعي	No لا	Do not know لا أعلم	Do not know لا أعلم	Do not know لا أعلم	Do not know لا أعلم	Do not know لا أعلم	Do not know لا أعلم	No لا	No لا	Do not know لا أعلم	Do not know لا أعلم	Do not know لا أعلم	Do not know لا أعلم
Agree أوافق	Female أنثى	30	Saudi سعودي	جامعة الدمام	Nursing التمريض	متخرج	3.5-4	It is simulating human attitudes and abilities using computers and technology by teaching machines how humans think, behave, and react toward different situations. هو سلوك وخصائص معينة تتسم بها البرامج الحاسوبية، تجعلها تحاكي القدرات الذهنية البشرية وأنماط عملها.	Broadcast Media (TV, Radio). وسائل الإعلام المرئية (تلفزيون ، راديو), Social Media (Facebook, Instagram, Snapchat, Tweeter,…). وسائل التواصل الاجتماعي	No لا	Yes نعم	Yes نعم	Do not know لا أعلم	No لا	Yes نعم	Do not know لا أعلم	Yes نعم	Yes نعم	Do not know لا أعلم	Do not know لا أعلم	Do not know لا أعلم	Do not know لا أعلم
Agree أوافق	Male ذكر	23	Saudi سعودي	جامعه الامام عبد الرحمن	Medicine الطب	4th year السنة الرابعة	3.5-4	It is simulating human attitudes and abilities using computers and technology by teaching machines how humans think, behave, and react toward different situations. هو سلوك وخصائص معينة تتسم بها البرامج الحاسوبية، تجعلها تحاكي القدرات الذهنية البشرية وأنماط عملها.	Academic courses المناهج الدراسية, Broadcast Media (TV, Radio). وسائل الإعلام المرئية (تلفزيون ، راديو), Social Media (Facebook, Instagram, Snapchat, Tweeter,…). وسائل التواصل الاجتماعي, Internet (web pages, online databases,...). الإنترنت (صفحات الويب، قواعد البيانات، ...)	No لا	Yes نعم	Yes نعم	Yes نعم	Yes نعم	No لا	Yes نعم	Do not know لا أعلم	Yes نعم	Yes نعم	Yes نعم	Yes نعم	Yes نعم
Agree أوافق	Female أنثى	19	Saudi سعودي	جامعه الامام عبد الرحمن	Radiology الأشعة	1st year السنة الأولى	3.5-4	It is simulating human attitudes and abilities using computers and technology by teaching machines how humans think, behave, and react toward different situations. هو سلوك وخصائص معينة تتسم بها البرامج الحاسوبية، تجعلها تحاكي القدرات الذهنية البشرية وأنماط عملها.	Print Media (books, magazines, newspapers). وسائل الإعلام المطبوعة (كتب، مجلات، صحف)., Broadcast Media (TV, Radio). وسائل الإعلام المرئية (تلفزيون ، راديو)	No لا	Do not know لا أعلم	Do not know لا أعلم	Do not know لا أعلم	Do not know لا أعلم	Do not know لا أعلم	Yes نعم	Do not know لا أعلم	Do not know لا أعلم	No لا	Yes نعم	Yes نعم	Do not know لا أعلم
Agree أوافق	Female أنثى	32	Saudi سعودي	كليه بدمام	موظفه	موظفه	4-4.5	It is simulating human attitudes and abilities using computers and technology by teaching machines how humans think, behave, and react toward different situations. هو سلوك وخصائص معينة تتسم بها البرامج الحاسوبية، تجعلها تحاكي القدرات الذهنية البشرية وأنماط عملها.	Print Media (books, magazines, newspapers). وسائل الإعلام المطبوعة (كتب، مجلات، صحف)., Broadcast Media (TV, Radio). وسائل الإعلام المرئية (تلفزيون ، راديو), Internet (web pages, online databases,...). الإنترنت (صفحات الويب، قواعد البيانات، ...)	No لا	Yes نعم	Yes نعم	Yes نعم	Do not know لا أعلم	Do not know لا أعلم	Yes نعم	Yes نعم	Yes نعم	No لا	Do not know لا أعلم	Yes نعم	Yes نعم
Agree أوافق	Female أنثى	22	Saudi سعودي	King Saud University, Riyadh. جامعة الملك سعود، الرياض	Pharmacy الصيدلة	4th year السنة الرابعة	>4.5	It is simulating human attitudes and abilities using computers and technology by teaching machines how humans think, behave, and react toward different situations. هو سلوك وخصائص معينة تتسم بها البرامج الحاسوبية، تجعلها تحاكي القدرات الذهنية البشرية وأنماط عملها.	Social Media (Facebook, Instagram, Snapchat, Tweeter,…). وسائل التواصل الاجتماعي, Internet (web pages, online databases,...). الإنترنت (صفحات الويب، قواعد البيانات، ...), Family members. أفراد الأسرة, Friends. أصدقاء	No لا	Yes نعم	Do not know لا أعلم	Yes نعم	No لا	Yes نعم	Yes نعم	Do not know لا أعلم	Yes نعم	Do not know لا أعلم	Do not know لا أعلم	Do not know لا أعلم	Do not know لا أعلم
Agree أوافق	Female أنثى	22	Saudi سعودي	King Saud University, Riyadh. جامعة الملك سعود، الرياض	Pharmacy الصيدلة	4th year السنة الرابعة	>4.5	It is simulating human attitudes and abilities using computers and technology by teaching machines how humans think, behave, and react toward different situations. هو سلوك وخصائص معينة تتسم بها البرامج الحاسوبية، تجعلها تحاكي القدرات الذهنية البشرية وأنماط عملها.	Broadcast Media (TV, Radio). وسائل الإعلام المرئية (تلفزيون ، راديو), Social Media (Facebook, Instagram, Snapchat, Tweeter,…). وسائل التواصل الاجتماعي, Internet (web pages, online databases,...). الإنترنت (صفحات الويب، قواعد البيانات، ...), Family members. أفراد الأسرة, Friends. أصدقاء	No لا	Yes نعم	Yes نعم	Yes نعم	No لا	Yes نعم	Yes نعم	No لا	Yes نعم	Do not know لا أعلم	No لا	No لا	Do not know لا أعلم
Agree أوافق	Male ذكر	20	Saudi سعودي	King Abdulaziz University, Jeddah. جامعة الملك عبد العزيز، جدة	Medicine الطب	3rd year السنة الثالثة	≤3.5	It is simulating human attitudes and abilities using computers and technology by teaching machines how humans think, behave, and react toward different situations. هو سلوك وخصائص معينة تتسم بها البرامج الحاسوبية، تجعلها تحاكي القدرات الذهنية البشرية وأنماط عملها.	Academic courses المناهج الدراسية, Print Media (books, magazines, newspapers). وسائل الإعلام المطبوعة (كتب، مجلات، صحف)., Broadcast Media (TV, Radio). وسائل الإعلام المرئية (تلفزيون ، راديو), Outdoor Media (e.g.Billboards, Transit Ads,..). وسائل الإعلام الخارجية (مثل اللوحات الإعلانية والجدارية،..), Social Media (Facebook, Instagram, Snapchat, Tweeter,…). وسائل التواصل الاجتماعي, Internet (web pa…	No لا	Yes نعم	Yes نعم	Yes نعم	Yes نعم	Yes نعم	Yes نعم	Yes نعم	Yes نعم	Yes نعم	Yes نعم	Yes نعم	Yes نعم
Agree أوافق	Male ذكر	20	Saudi سعودي	King Abdulaziz University, Jeddah. جامعة الملك عبد العزيز، جدة	Medicine الطب	2nd year السنة الثانية	4-4.5	It is a medical dictionary used by healthcare consumers, students, and professionals. إنه قاموس طبي يستخدمه جمهور الرعاية الصحية والطلاب والمهنيون.	Social Media (Facebook, Instagram, Snapchat, Tweeter,…). وسائل التواصل الاجتماعي	Yes- as a personal effort. نعم كرغبة شخصية	Yes نعم	Yes نعم	Yes نعم	Yes نعم	Yes نعم	Yes نعم	Yes نعم	Yes نعم	Do not know لا أعلم	No لا	Yes نعم	No لا
Agree أوافق	Male ذكر	22	Saudi سعودي	King Abdulaziz University, Jeddah. جامعة الملك عبد العزيز، جدة	Medicine الطب	3rd year السنة الثالثة	4-4.5	It is simulating human attitudes and abilities using computers and technology by teaching machines how humans think, behave, and react toward different situations. هو سلوك وخصائص معينة تتسم بها البرامج الحاسوبية، تجعلها تحاكي القدرات الذهنية البشرية وأنماط عملها.	Broadcast Media (TV, Radio). وسائل الإعلام المرئية (تلفزيون ، راديو)	Yes- as a part of university curriculum. نعم كمنهج دراسي في الجامعة	Do not know لا أعلم	Yes نعم	Yes نعم	Yes نعم	No لا	Yes نعم	No لا	Yes نعم	Yes نعم	Yes نعم	No لا	Do not know لا أعلم
Agree أوافق	Female أنثى	22	Saudi سعودي	King Saud University, Riyadh. جامعة الملك سعود، الرياض	Pharmacy الصيدلة	5th year السنة الخامسة	>4.5	It is simulating human attitudes and abilities using computers and technology by teaching machines how humans think, behave, and react toward different situations. هو سلوك وخصائص معينة تتسم بها البرامج الحاسوبية، تجعلها تحاكي القدرات الذهنية البشرية وأنماط عملها.	Broadcast Media (TV, Radio). وسائل الإعلام المرئية (تلفزيون ، راديو), Social Media (Facebook, Instagram, Snapchat, Tweeter,…). وسائل التواصل الاجتماعي, Internet (web pages, online databases,...). الإنترنت (صفحات الويب، قواعد البيانات، ...), Friends. أصدقاء	No لا	Yes نعم	Yes نعم	Yes نعم	Do not know لا أعلم	Yes نعم	Yes نعم	Yes نعم	Yes نعم	No لا	No لا	No لا	Yes نعم
Agree أوافق	Female أنثى	21	Saudi سعودي	King Saud University, Riyadh. جامعة الملك سعود، الرياض	Pharmacy الصيدلة	3rd year السنة الثالثة	>4.5	It is simulating human attitudes and abilities using computers and technology by teaching machines how humans think, behave, and react toward different situations. هو سلوك وخصائص معينة تتسم بها البرامج الحاسوبية، تجعلها تحاكي القدرات الذهنية البشرية وأنماط عملها.	Social Media (Facebook, Instagram, Snapchat, Tweeter,…). وسائل التواصل الاجتماعي, Internet (web pages, online databases,...). الإنترنت (صفحات الويب، قواعد البيانات، ...), Friends. أصدقاء	No لا	Yes نعم	Yes نعم	Yes نعم	Yes نعم	Yes نعم	Yes نعم	Do not know لا أعلم	Yes نعم	Do not know لا أعلم	Do not know لا أعلم	Do not know لا أعلم	Do not know لا أعلم
Agree أوافق	Female أنثى	22	Saudi سعودي	King Saud University, Riyadh. جامعة الملك سعود، الرياض	Pharmacy الصيدلة	4th year السنة الرابعة	>4.5	It is simulating human attitudes and abilities using computers and technology by teaching machines how humans think, behave, and react toward different situations. هو سلوك وخصائص معينة تتسم بها البرامج الحاسوبية، تجعلها تحاكي القدرات الذهنية البشرية وأنماط عملها.	Social Media (Facebook, Instagram, Snapchat, Tweeter,…). وسائل التواصل الاجتماعي, Internet (web pages, online databases,...). الإنترنت (صفحات الويب، قواعد البيانات، ...)	No لا	Yes نعم	Yes نعم	Yes نعم	Do not know لا أعلم	Do not know لا أعلم	Yes نعم	Yes نعم	Yes نعم	No لا	No لا	No لا	Yes نعم
Agree أوافق	Female أنثى	21	Saudi سعودي	King Saud University, Riyadh. جامعة الملك سعود، الرياض	Pharmacy الصيدلة	4th year السنة الرابعة	>4.5	It is simulating human attitudes and abilities using computers and technology by teaching machines how humans think, behave, and react toward different situations. هو سلوك وخصائص معينة تتسم بها البرامج الحاسوبية، تجعلها تحاكي القدرات الذهنية البشرية وأنماط عملها.	Print Media (books, magazines, newspapers). وسائل الإعلام المطبوعة (كتب، مجلات، صحف)., Broadcast Media (TV, Radio). وسائل الإعلام المرئية (تلفزيون ، راديو), Social Media (Facebook, Instagram, Snapchat, Tweeter,…). وسائل التواصل الاجتماعي, Internet (web pages, online databases,...). الإنترنت (صفحات الويب، قواعد البيانات، ...), Family members. أفراد الأسرة, Friends. أصدقاء	No لا	Yes نعم	Yes نعم	Yes نعم	Yes نعم	Yes نعم	Yes نعم	Yes نعم	Yes نعم	Yes نعم	Yes نعم	Yes نعم	Yes نعم
Agree أوافق	Female أنثى	18	Saudi سعودي	King Abdulaziz University, Jeddah. جامعة الملك عبد العزيز، جدة	Medicine الطب	1st year السنة الأولى	>4.5	It is simulating human attitudes and abilities using computers and technology by teaching machines how humans think, behave, and react toward different situations. هو سلوك وخصائص معينة تتسم بها البرامج الحاسوبية، تجعلها تحاكي القدرات الذهنية البشرية وأنماط عملها.	Broadcast Media (TV, Radio). وسائل الإعلام المرئية (تلفزيون ، راديو), Friends. أصدقاء	No لا	Yes نعم	Do not know لا أعلم	Yes نعم	Yes نعم	Yes نعم	Yes نعم	No لا	No لا	Yes نعم	Yes نعم	Yes نعم	Yes نعم
Agree أوافق	Male ذكر	24	Saudi سعودي	King Abdulaziz University, Jeddah. جامعة الملك عبد العزيز، جدة	Medicine الطب	4th year السنة الرابعة	4-4.5	It is simulating human attitudes and abilities using computers and technology by teaching machines how humans think, behave, and react toward different situations. هو سلوك وخصائص معينة تتسم بها البرامج الحاسوبية، تجعلها تحاكي القدرات الذهنية البشرية وأنماط عملها.	Outdoor Media (e.g.Billboards, Transit Ads,..). وسائل الإعلام الخارجية (مثل اللوحات الإعلانية والجدارية،..), Video games. ألعاب الفيديو, Friends. أصدقاء,	Yes- as a personal effort. نعم كرغبة شخصية	Yes نعم	No لا	Yes نعم	Yes نعم	Yes نعم	Yes نعم	No لا	Yes نعم	Do not know لا أعلم	No لا	Yes نعم	Yes نعم
Agree أوافق	Male ذكر	21	Saudi سعودي	King Abdulaziz University, Jeddah. جامعة الملك عبد العزيز، جدة	Medicine الطب	3rd year السنة الثالثة	3.5-4	It is simulating human attitudes and abilities using computers and technology by teaching machines how humans think, behave, and react toward different situations. هو سلوك وخصائص معينة تتسم بها البرامج الحاسوبية، تجعلها تحاكي القدرات الذهنية البشرية وأنماط عملها.	Academic courses المناهج الدراسية	Yes- as a personal effort. نعم كرغبة شخصية	Yes نعم	Yes نعم	Yes نعم	No لا	No لا	Yes نعم	Yes نعم	Yes نعم	Yes نعم	Yes نعم	Yes نعم	Yes نعم
Agree أوافق	Male ذكر	20	Saudi سعودي	King Abdulaziz University, Jeddah. جامعة الملك عبد العزيز، جدة	Medicine الطب	1st year السنة الأولى	4-4.5	It is simulating human attitudes and abilities using computers and technology by teaching machines how humans think, behave, and react toward different situations. هو سلوك وخصائص معينة تتسم بها البرامج الحاسوبية، تجعلها تحاكي القدرات الذهنية البشرية وأنماط عملها.	Print Media (books, magazines, newspapers). وسائل الإعلام المطبوعة (كتب، مجلات، صحف)., Broadcast Media (TV, Radio). وسائل الإعلام المرئية (تلفزيون ، راديو), Outdoor Media (e.g.Billboards, Transit Ads,..). وسائل الإعلام الخارجية (مثل اللوحات الإعلانية والجدارية،..)	Yes- as a personal effort. نعم كرغبة شخصية	Yes نعم	Yes نعم	Yes نعم	Yes نعم	Yes نعم	Yes نعم	Yes نعم	Yes نعم	Yes نعم	Yes نعم	Yes نعم	Yes نعم
Agree أوافق	Male ذكر	26	Saudi سعودي	King Abdulaziz University, Jeddah. جامعة الملك عبد العزيز، جدة	Medicine الطب	intern إنترن	4-4.5	It is simulating human attitudes and abilities using computers and technology by teaching machines how humans think, behave, and react toward different situations. هو سلوك وخصائص معينة تتسم بها البرامج الحاسوبية، تجعلها تحاكي القدرات الذهنية البشرية وأنماط عملها.	Print Media (books, magazines, newspapers). وسائل الإعلام المطبوعة (كتب، مجلات، صحف)., Broadcast Media (TV, Radio). وسائل الإعلام المرئية (تلفزيون ، راديو), Outdoor Media (e.g.Billboards, Transit Ads,..). وسائل الإعلام الخارجية (مثل اللوحات الإعلانية والجدارية،..), Social Media (Facebook, Instagram, Snapchat, Tweeter,…). وسائل التواصل الاجتماعي, Internet (web pages, online databases,...). الإنترن…	Yes- as a personal effort. نعم كرغبة شخصية	Yes نعم	Yes نعم	Yes نعم	Yes نعم	Yes نعم	Yes نعم	Yes نعم	Yes نعم	Yes نعم	Yes نعم	Yes نعم	Yes نعم
Agree أوافق	Male ذكر	21	Saudi سعودي	King Abdulaziz University, Jeddah. جامعة الملك عبد العزيز، جدة	Medicine الطب	3rd year السنة الثالثة	4-4.5	It is simulating human attitudes and abilities using computers and technology by teaching machines how humans think, behave, and react toward different situations. هو سلوك وخصائص معينة تتسم بها البرامج الحاسوبية، تجعلها تحاكي القدرات الذهنية البشرية وأنماط عملها.	Print Media (books, magazines, newspapers). وسائل الإعلام المطبوعة (كتب، مجلات، صحف)., Social Media (Facebook, Instagram, Snapchat, Tweeter,…). وسائل التواصل الاجتماعي, Internet (web pages, online databases,...). الإنترنت (صفحات الويب، قواعد البيانات، ...), Family members. أفراد الأسرة	Yes- as a personal effort. نعم كرغبة شخصية	Yes نعم	Yes نعم	Yes نعم	Yes نعم	Yes نعم	Do not know لا أعلم	Do not know لا أعلم	Yes نعم	Yes نعم	Yes نعم	Yes نعم	Yes نعم
Agree أوافق	Male ذكر	19	Saudi سعودي	King Abdulaziz University, Jeddah. جامعة الملك عبد العزيز، جدة	Medicine الطب	1st year السنة الأولى	4-4.5	It is a medical dictionary used by healthcare consumers, students, and professionals. إنه قاموس طبي يستخدمه جمهور الرعاية الصحية والطلاب والمهنيون.	Broadcast Media (TV, Radio). وسائل الإعلام المرئية (تلفزيون ، راديو), Internet (web pages, online databases,...). الإنترنت (صفحات الويب، قواعد البيانات، ...)	Yes- as a personal effort. نعم كرغبة شخصية	Yes نعم	Yes نعم	Do not know لا أعلم	Yes نعم	Yes نعم	Yes نعم	Yes نعم	Yes نعم	Yes نعم	Yes نعم	Yes نعم	Yes نعم
Agree أوافق	Male ذكر	22	Saudi سعودي	King Abdulaziz University, Jeddah. جامعة الملك عبد العزيز، جدة	Medicine الطب	4th year السنة الرابعة	4-4.5	It is a medical dictionary used by healthcare consumers, students, and professionals. إنه قاموس طبي يستخدمه جمهور الرعاية الصحية والطلاب والمهنيون.	Broadcast Media (TV, Radio). وسائل الإعلام المرئية (تلفزيون ، راديو), Internet (web pages, online databases,...). الإنترنت (صفحات الويب، قواعد البيانات، ...), Family members. أفراد الأسرة	Yes- as a personal effort. نعم كرغبة شخصية	Yes نعم	Yes نعم	Yes نعم	Do not know لا أعلم	Yes نعم	Yes نعم	Yes نعم	Yes نعم	Yes نعم	Yes نعم	Yes نعم	Yes نعم
Agree أوافق	Male ذكر	20	Saudi سعودي	King Abdulaziz University, Jeddah. جامعة الملك عبد العزيز، جدة	Medicine الطب	3rd year السنة الثالثة	>4.5	It is simulating human attitudes and abilities using computers and technology by teaching machines how humans think, behave, and react toward different situations. هو سلوك وخصائص معينة تتسم بها البرامج الحاسوبية، تجعلها تحاكي القدرات الذهنية البشرية وأنماط عملها.	Social Media (Facebook, Instagram, Snapchat, Tweeter,…). وسائل التواصل الاجتماعي, Internet (web pages, online databases,...). الإنترنت (صفحات الويب، قواعد البيانات، ...), Friends. أصدقاء	No لا	Yes نعم	Do not know لا أعلم	Do not know لا أعلم	Yes نعم	No لا	Yes نعم	Do not know لا أعلم	Do not know لا أعلم	Yes نعم	No لا	No لا	Yes نعم
Agree أوافق	Female أنثى	22	Saudi سعودي	King Abdulaziz University, Jeddah. جامعة الملك عبد العزيز، جدة	Medicine الطب	4th year السنة الرابعة	>4.5	It is simulating human attitudes and abilities using computers and technology by teaching machines how humans think, behave, and react toward different situations. هو سلوك وخصائص معينة تتسم بها البرامج الحاسوبية، تجعلها تحاكي القدرات الذهنية البشرية وأنماط عملها.	Print Media (books, magazines, newspapers). وسائل الإعلام المطبوعة (كتب، مجلات، صحف)., Broadcast Media (TV, Radio). وسائل الإعلام المرئية (تلفزيون ، راديو), Outdoor Media (e.g.Billboards, Transit Ads,..). وسائل الإعلام الخارجية (مثل اللوحات الإعلانية والجدارية،..), Social Media (Facebook, Instagram, Snapchat, Tweeter,…). وسائل التواصل الاجتماعي	Yes- as a personal effort. نعم كرغبة شخصية	Yes نعم	Yes نعم	Yes نعم	Yes نعم	Yes نعم	Yes نعم	Yes نعم	Yes نعم	Yes نعم	Yes نعم	Yes نعم	Yes نعم
Agree أوافق	Male ذكر	21	Saudi سعودي	King Abdulaziz University, Jeddah. جامعة الملك عبد العزيز، جدة	Pharmacy الصيدلة	2nd year السنة الثانية	4-4.5	It is a medical dictionary used by healthcare consumers, students, and professionals. إنه قاموس طبي يستخدمه جمهور الرعاية الصحية والطلاب والمهنيون.	Broadcast Media (TV, Radio). وسائل الإعلام المرئية (تلفزيون ، راديو), Outdoor Media (e.g.Billboards, Transit Ads,..). وسائل الإعلام الخارجية (مثل اللوحات الإعلانية والجدارية،..), Video games. ألعاب الفيديو	Yes- as a personal effort. نعم كرغبة شخصية	Yes نعم	Yes نعم	Yes نعم	Yes نعم	Yes نعم	Yes نعم	Yes نعم	Yes نعم	Yes نعم	Yes نعم	Yes نعم	Yes نعم
Agree أوافق	Male ذكر	20	Saudi سعودي	King Abdulaziz University, Jeddah. جامعة الملك عبد العزيز، جدة	Medicine الطب	2nd year السنة الثانية	>4.5	It is simulating human attitudes and abilities using computers and technology by teaching machines how humans think, behave, and react toward different situations. هو سلوك وخصائص معينة تتسم بها البرامج الحاسوبية، تجعلها تحاكي القدرات الذهنية البشرية وأنماط عملها.	Broadcast Media (TV, Radio). وسائل الإعلام المرئية (تلفزيون ، راديو), Social Media (Facebook, Instagram, Snapchat, Tweeter,…). وسائل التواصل الاجتماعي, Internet (web pages, online databases,...). الإنترنت (صفحات الويب، قواعد البيانات، ...), Video games. ألعاب الفيديو, Family members. أفراد الأسرة	No لا	Yes نعم	Yes نعم	Yes نعم	Yes نعم	No لا	Yes نعم	Yes نعم	Yes نعم	Yes نعم	No لا	No لا	No لا
Agree أوافق	Male ذكر	25	Saudi سعودي	King Abdulaziz University, Jeddah. جامعة الملك عبد العزيز، جدة	Medicine الطب	5th year السنة الخامسة	4-4.5	It is simulating human attitudes and abilities using computers and technology by teaching machines how humans think, behave, and react toward different situations. هو سلوك وخصائص معينة تتسم بها البرامج الحاسوبية، تجعلها تحاكي القدرات الذهنية البشرية وأنماط عملها.	Broadcast Media (TV, Radio). وسائل الإعلام المرئية (تلفزيون ، راديو), Outdoor Media (e.g.Billboards, Transit Ads,..). وسائل الإعلام الخارجية (مثل اللوحات الإعلانية والجدارية،..), Social Media (Facebook, Instagram, Snapchat, Tweeter,…). وسائل التواصل الاجتماعي	Yes- as a personal effort. نعم كرغبة شخصية	Yes نعم	Yes نعم	Yes نعم	Yes نعم	Yes نعم	Do not know لا أعلم	Yes نعم	Yes نعم	Yes نعم	Yes نعم	Yes نعم	Yes نعم
Agree أوافق	Female أنثى	21	Saudi سعودي	King Abdulaziz University, Jeddah. جامعة الملك عبد العزيز، جدة	Medicine الطب	2nd year السنة الثانية	4-4.5	It is simulating human attitudes and abilities using computers and technology by teaching machines how humans think, behave, and react toward different situations. هو سلوك وخصائص معينة تتسم بها البرامج الحاسوبية، تجعلها تحاكي القدرات الذهنية البشرية وأنماط عملها.	Broadcast Media (TV, Radio). وسائل الإعلام المرئية (تلفزيون ، راديو), Outdoor Media (e.g.Billboards, Transit Ads,..). وسائل الإعلام الخارجية (مثل اللوحات الإعلانية والجدارية،..), Social Media (Facebook, Instagram, Snapchat, Tweeter,…). وسائل التواصل الاجتماعي, Internet (web pages, online databases,...). الإنترنت (صفحات الويب، قواعد البيانات، ...), Video games. ألعاب الفيديو, Family members. أفراد…	Yes- as a personal effort. نعم كرغبة شخصية	Yes نعم	Yes نعم	Yes نعم	Yes نعم	Yes نعم	Yes نعم	Yes نعم	Yes نعم	Yes نعم	Yes نعم	Yes نعم	Yes نعم
Agree أوافق	Male ذكر	18	Saudi سعودي	King Abdulaziz University, Jeddah. جامعة الملك عبد العزيز، جدة	Medicine الطب	1st year السنة الأولى	4-4.5	It is simulating human attitudes and abilities using computers and technology by teaching machines how humans think, behave, and react toward different situations. هو سلوك وخصائص معينة تتسم بها البرامج الحاسوبية، تجعلها تحاكي القدرات الذهنية البشرية وأنماط عملها.	Broadcast Media (TV, Radio). وسائل الإعلام المرئية (تلفزيون ، راديو), Outdoor Media (e.g.Billboards, Transit Ads,..). وسائل الإعلام الخارجية (مثل اللوحات الإعلانية والجدارية،..), Social Media (Facebook, Instagram, Snapchat, Tweeter,…). وسائل التواصل الاجتماعي, Internet (web pages, online databases,...). الإنترنت (صفحات الويب، قواعد البيانات، ...), Video games. ألعاب الفيديو, Family members. أفراد…	Yes- as a personal effort. نعم كرغبة شخصية	Yes نعم	Yes نعم	Yes نعم	Yes نعم	Yes نعم	Yes نعم	Yes نعم	Yes نعم	Yes نعم	Yes نعم	Yes نعم	Yes نعم
Agree أوافق	Male ذكر	22	Saudi سعودي	King Abdulaziz University, Jeddah. جامعة الملك عبد العزيز، جدة	Medicine الطب	3rd year السنة الثالثة	4-4.5	It is simulating human attitudes and abilities using computers and technology by teaching machines how humans think, behave, and react toward different situations. هو سلوك وخصائص معينة تتسم بها البرامج الحاسوبية، تجعلها تحاكي القدرات الذهنية البشرية وأنماط عملها.	Print Media (books, magazines, newspapers). وسائل الإعلام المطبوعة (كتب، مجلات، صحف)., Outdoor Media (e.g.Billboards, Transit Ads,..). وسائل الإعلام الخارجية (مثل اللوحات الإعلانية والجدارية،..), Internet (web pages, online databases,...). الإنترنت (صفحات الويب، قواعد البيانات، ...)	Yes- as a personal effort. نعم كرغبة شخصية	Yes نعم	Yes نعم	Yes نعم	Yes نعم	Yes نعم	Yes نعم	Yes نعم	Yes نعم	Yes نعم	Yes نعم	Yes نعم	Yes نعم
Agree أوافق	Male ذكر	20	Saudi سعودي	King Abdulaziz University, Jeddah. جامعة الملك عبد العزيز، جدة	Medicine الطب	2nd year السنة الثانية	4-4.5	It is simulating human attitudes and abilities using computers and technology by teaching machines how humans think, behave, and react toward different situations. هو سلوك وخصائص معينة تتسم بها البرامج الحاسوبية، تجعلها تحاكي القدرات الذهنية البشرية وأنماط عملها.	Broadcast Media (TV, Radio). وسائل الإعلام المرئية (تلفزيون ، راديو), Social Media (Facebook, Instagram, Snapchat, Tweeter,…). وسائل التواصل الاجتماعي	Yes- as a personal effort. نعم كرغبة شخصية	Yes نعم	Yes نعم	Yes نعم	Yes نعم	Yes نعم	Do not know لا أعلم	Yes نعم	Yes نعم	Yes نعم	Do not know لا أعلم	Yes نعم	Yes نعم
Agree أوافق	Male ذكر	20	Saudi سعودي	King Abdulaziz University, Jeddah. جامعة الملك عبد العزيز، جدة	Medicine الطب	3rd year السنة الثالثة	4-4.5	It is simulating human attitudes and abilities using computers and technology by teaching machines how humans think, behave, and react toward different situations. هو سلوك وخصائص معينة تتسم بها البرامج الحاسوبية، تجعلها تحاكي القدرات الذهنية البشرية وأنماط عملها.	Print Media (books, magazines, newspapers). وسائل الإعلام المطبوعة (كتب، مجلات، صحف)., Broadcast Media (TV, Radio). وسائل الإعلام المرئية (تلفزيون ، راديو)	No لا	Do not know لا أعلم	Yes نعم	Yes نعم	No لا	Yes نعم	No لا	Yes نعم	No لا	Yes نعم	No لا	Yes نعم	Yes نعم
Agree أوافق	Male ذكر	23	Saudi سعودي	King Abdulaziz University, Jeddah. جامعة الملك عبد العزيز، جدة	Medicine الطب	2nd year السنة الثانية	3.5-4	It is simulating human attitudes and abilities using computers and technology by teaching machines how humans think, behave, and react toward different situations. هو سلوك وخصائص معينة تتسم بها البرامج الحاسوبية، تجعلها تحاكي القدرات الذهنية البشرية وأنماط عملها.	Broadcast Media (TV, Radio). وسائل الإعلام المرئية (تلفزيون ، راديو), Outdoor Media (e.g.Billboards, Transit Ads,..). وسائل الإعلام الخارجية (مثل اللوحات الإعلانية والجدارية،..), Social Media (Facebook, Instagram, Snapchat, Tweeter,…). وسائل التواصل الاجتماعي, Internet (web pages, online databases,...). الإنترنت (صفحات الويب، قواعد البيانات، ...)	Yes- as a personal effort. نعم كرغبة شخصية	Yes نعم	Yes نعم	Yes نعم	Do not know لا أعلم	Yes نعم	Yes نعم	Yes نعم	Yes نعم	Yes نعم	Yes نعم	Yes نعم	Do not know لا أعلم
Agree أوافق	Male ذكر	25	Saudi سعودي	King Abdulaziz University, Jeddah. جامعة الملك عبد العزيز، جدة	Medicine الطب	5th year السنة الخامسة	4-4.5	It is simulating human attitudes and abilities using computers and technology by teaching machines how humans think, behave, and react toward different situations. هو سلوك وخصائص معينة تتسم بها البرامج الحاسوبية، تجعلها تحاكي القدرات الذهنية البشرية وأنماط عملها.	Broadcast Media (TV, Radio). وسائل الإعلام المرئية (تلفزيون ، راديو), Social Media (Facebook, Instagram, Snapchat, Tweeter,…). وسائل التواصل الاجتماعي, Internet (web pages, online databases,...). الإنترنت (صفحات الويب، قواعد البيانات، ...), Family members. أفراد الأسرة	Yes- as a personal effort. نعم كرغبة شخصية	Yes نعم	Yes نعم	Yes نعم	Yes نعم	Yes نعم	Yes نعم	Yes نعم	Yes نعم	Yes نعم	Yes نعم	Yes نعم	Yes نعم
Agree أوافق	Female أنثى	19	Saudi سعودي	King Abdulaziz University, Jeddah. جامعة الملك عبد العزيز، جدة	Medicine الطب	1st year السنة الأولى	>4.5	It is simulating human attitudes and abilities using computers and technology by teaching machines how humans think, behave, and react toward different situations. هو سلوك وخصائص معينة تتسم بها البرامج الحاسوبية، تجعلها تحاكي القدرات الذهنية البشرية وأنماط عملها.	Outdoor Media (e.g.Billboards, Transit Ads,..). وسائل الإعلام الخارجية (مثل اللوحات الإعلانية والجدارية،..), Social Media (Facebook, Instagram, Snapchat, Tweeter,…). وسائل التواصل الاجتماعي, Internet (web pages, online databases,...). الإنترنت (صفحات الويب، قواعد البيانات، ...), Video games. ألعاب الفيديو, Family members. أفراد الأسرة, Friends. أصدقاء	Yes- as a personal effort. نعم كرغبة شخصية	Yes نعم	Yes نعم	Yes نعم	Yes نعم	Yes نعم	Yes نعم	Yes نعم	Yes نعم	Yes نعم	Do not know لا أعلم	Yes نعم	Yes نعم
Agree أوافق	Male ذكر	23	Saudi سعودي	King Abdulaziz University, Jeddah. جامعة الملك عبد العزيز، جدة	Medicine الطب	2nd year السنة الثانية	4-4.5	It is simulating human attitudes and abilities using computers and technology by teaching machines how humans think, behave, and react toward different situations. هو سلوك وخصائص معينة تتسم بها البرامج الحاسوبية، تجعلها تحاكي القدرات الذهنية البشرية وأنماط عملها.	Outdoor Media (e.g.Billboards, Transit Ads,..). وسائل الإعلام الخارجية (مثل اللوحات الإعلانية والجدارية،..), Social Media (Facebook, Instagram, Snapchat, Tweeter,…). وسائل التواصل الاجتماعي, Internet (web pages, online databases,...). الإنترنت (صفحات الويب، قواعد البيانات، ...), Friends. أصدقاء	Yes- as a personal effort. نعم كرغبة شخصية	Yes نعم	Yes نعم	Yes نعم	Do not know لا أعلم	Yes نعم	Yes نعم	Yes نعم	Yes نعم	Yes نعم	Yes نعم	Yes نعم	Yes نعم
Agree أوافق	Male ذكر	24	Saudi سعودي	King Abdulaziz University, Jeddah. جامعة الملك عبد العزيز، جدة	Medicine الطب	2nd year السنة الثانية	4-4.5	It is simulating human attitudes and abilities using computers and technology by teaching machines how humans think, behave, and react toward different situations. هو سلوك وخصائص معينة تتسم بها البرامج الحاسوبية، تجعلها تحاكي القدرات الذهنية البشرية وأنماط عملها.	Print Media (books, magazines, newspapers). وسائل الإعلام المطبوعة (كتب، مجلات، صحف)., Broadcast Media (TV, Radio). وسائل الإعلام المرئية (تلفزيون ، راديو), Outdoor Media (e.g.Billboards, Transit Ads,..). وسائل الإعلام الخارجية (مثل اللوحات الإعلانية والجدارية،..), Social Media (Facebook, Instagram, Snapchat, Tweeter,…). وسائل التواصل الاجتماعي, Friends. أصدقاء	Yes- as a personal effort. نعم كرغبة شخصية	Yes نعم	Yes نعم	Yes نعم	Yes نعم	Yes نعم	Yes نعم	Yes نعم	Yes نعم	Yes نعم	No لا	Yes نعم	Yes نعم
Agree أوافق	Female أنثى	21	Saudi سعودي	King Abdulaziz University, Jeddah. جامعة الملك عبد العزيز، جدة	Medicine الطب	3rd year السنة الثالثة	>4.5	It is simulating human attitudes and abilities using computers and technology by teaching machines how humans think, behave, and react toward different situations. هو سلوك وخصائص معينة تتسم بها البرامج الحاسوبية، تجعلها تحاكي القدرات الذهنية البشرية وأنماط عملها.	Print Media (books, magazines, newspapers). وسائل الإعلام المطبوعة (كتب، مجلات، صحف)., Broadcast Media (TV, Radio). وسائل الإعلام المرئية (تلفزيون ، راديو), Outdoor Media (e.g.Billboards, Transit Ads,..). وسائل الإعلام الخارجية (مثل اللوحات الإعلانية والجدارية،..), Social Media (Facebook, Instagram, Snapchat, Tweeter,…). وسائل التواصل الاجتماعي, Internet (web pages, online databases,...). الإنترن…	Yes- as a personal effort. نعم كرغبة شخصية	Yes نعم	Yes نعم	Yes نعم	Yes نعم	Yes نعم	Yes نعم	Yes نعم	Yes نعم	Yes نعم	Yes نعم	Yes نعم	Yes نعم
Agree أوافق	Male ذكر	18	Saudi سعودي	King Abdulaziz University, Jeddah. جامعة الملك عبد العزيز، جدة	Medicine الطب	1st year السنة الأولى	4-4.5	It is simulating human attitudes and abilities using computers and technology by teaching machines how humans think, behave, and react toward different situations. هو سلوك وخصائص معينة تتسم بها البرامج الحاسوبية، تجعلها تحاكي القدرات الذهنية البشرية وأنماط عملها.	Print Media (books, magazines, newspapers). وسائل الإعلام المطبوعة (كتب، مجلات، صحف)., Broadcast Media (TV, Radio). وسائل الإعلام المرئية (تلفزيون ، راديو), Outdoor Media (e.g.Billboards, Transit Ads,..). وسائل الإعلام الخارجية (مثل اللوحات الإعلانية والجدارية،..), Social Media (Facebook, Instagram, Snapchat, Tweeter,…). وسائل التواصل الاجتماعي	Yes- as a personal effort. نعم كرغبة شخصية	Yes نعم	Yes نعم	Yes نعم	Yes نعم	Do not know لا أعلم	Yes نعم	Yes نعم	Yes نعم	Yes نعم	No لا	Yes نعم	Yes نعم
Agree أوافق	Male ذكر	22	Saudi سعودي	King Abdulaziz University, Jeddah. جامعة الملك عبد العزيز، جدة	Medicine الطب	3rd year السنة الثالثة	3.5-4	It is simulating human attitudes and abilities using computers and technology by teaching machines how humans think, behave, and react toward different situations. هو سلوك وخصائص معينة تتسم بها البرامج الحاسوبية، تجعلها تحاكي القدرات الذهنية البشرية وأنماط عملها.	Print Media (books, magazines, newspapers). وسائل الإعلام المطبوعة (كتب، مجلات، صحف)., Broadcast Media (TV, Radio). وسائل الإعلام المرئية (تلفزيون ، راديو), Family members. أفراد الأسرة	Yes- as a personal effort. نعم كرغبة شخصية	Yes نعم	Yes نعم	Yes نعم	Yes نعم	Yes نعم	Yes نعم	Yes نعم	Yes نعم	Yes نعم	Yes نعم	Yes نعم	Yes نعم
Agree أوافق	Male ذكر	19	Saudi سعودي	King Abdulaziz University, Jeddah. جامعة الملك عبد العزيز، جدة	Medicine الطب	1st year السنة الأولى	>4.5	It is simulating human attitudes and abilities using computers and technology by teaching machines how humans think, behave, and react toward different situations. هو سلوك وخصائص معينة تتسم بها البرامج الحاسوبية، تجعلها تحاكي القدرات الذهنية البشرية وأنماط عملها.	Broadcast Media (TV, Radio). وسائل الإعلام المرئية (تلفزيون ، راديو), Social Media (Facebook, Instagram, Snapchat, Tweeter,…). وسائل التواصل الاجتماعي, Video games. ألعاب الفيديو, Family members. أفراد الأسرة, Friends. أصدقاء	Yes- as a personal effort. نعم كرغبة شخصية	Yes نعم	Yes نعم	Yes نعم	Yes نعم	Yes نعم	Do not know لا أعلم	Yes نعم	Do not know لا أعلم	Do not know لا أعلم	Do not know لا أعلم	Yes نعم	Yes نعم
Agree أوافق	Female أنثى	37	Saudi سعودي	King Abdulaziz University, Jeddah. جامعة الملك عبد العزيز، جدة	خريجة كيمياء حيوية	Postgraduate (e.g. MSc. or PhD) دراسات عليا (ماجستير أو دكتوراه)	3.5-4	It is simulating human attitudes and abilities using computers and technology by teaching machines how humans think, behave, and react toward different situations. هو سلوك وخصائص معينة تتسم بها البرامج الحاسوبية، تجعلها تحاكي القدرات الذهنية البشرية وأنماط عملها.	Social Media (Facebook, Instagram, Snapchat, Tweeter,…). وسائل التواصل الاجتماعي	Yes- as a personal effort. نعم كرغبة شخصية	Yes نعم	Yes نعم	Yes نعم	Yes نعم	Yes نعم	Yes نعم	Yes نعم	Yes نعم	No لا	Do not know لا أعلم	Do not know لا أعلم	Yes نعم
Agree أوافق	Female أنثى	20	Saudi سعودي	Batterjee Medical College, Jeddah. كلية البترجي الطبية، جدة	Pharmacy الصيدلة	1st year السنة الأولى	≤3.5	It is simulating human attitudes and abilities using computers and technology by teaching machines how humans think, behave, and react toward different situations. هو سلوك وخصائص معينة تتسم بها البرامج الحاسوبية، تجعلها تحاكي القدرات الذهنية البشرية وأنماط عملها.	Academic courses المناهج الدراسية, Print Media (books, magazines, newspapers). وسائل الإعلام المطبوعة (كتب، مجلات، صحف)., Social Media (Facebook, Instagram, Snapchat, Tweeter,…). وسائل التواصل الاجتماعي, Internet (web pages, online databases,...). الإنترنت (صفحات الويب، قواعد البيانات، ...)	No لا	Yes نعم	Do not know لا أعلم	Yes نعم	No لا	Do not know لا أعلم	Yes نعم	Yes نعم	Yes نعم	No لا	No لا	Do not know لا أعلم	Do not know لا أعلم
Agree أوافق	Male ذكر	20	Saudi سعودي	King Abdulaziz University, Jeddah. جامعة الملك عبد العزيز، جدة	Medicine الطب	3rd year السنة الثالثة	4-4.5	It is simulating human attitudes and abilities using computers and technology by teaching machines how humans think, behave, and react toward different situations. هو سلوك وخصائص معينة تتسم بها البرامج الحاسوبية، تجعلها تحاكي القدرات الذهنية البشرية وأنماط عملها.	Broadcast Media (TV, Radio). وسائل الإعلام المرئية (تلفزيون ، راديو), Social Media (Facebook, Instagram, Snapchat, Tweeter,…). وسائل التواصل الاجتماعي, Internet (web pages, online databases,...). الإنترنت (صفحات الويب، قواعد البيانات، ...), Friends. أصدقاء	No لا	Yes نعم	Yes نعم	No لا	No لا	Yes نعم	No لا	No لا	Yes نعم	No لا	Yes نعم	No لا	Yes نعم
Agree أوافق	Male ذكر	21	Saudi سعودي	King Abdulaziz University, Jeddah. جامعة الملك عبد العزيز، جدة	Medicine الطب	2nd year السنة الثانية	3.5-4	It is simulating human attitudes and abilities using computers and technology by teaching machines how humans think, behave, and react toward different situations. هو سلوك وخصائص معينة تتسم بها البرامج الحاسوبية، تجعلها تحاكي القدرات الذهنية البشرية وأنماط عملها.	Print Media (books, magazines, newspapers). وسائل الإعلام المطبوعة (كتب، مجلات، صحف)., Outdoor Media (e.g.Billboards, Transit Ads,..). وسائل الإعلام الخارجية (مثل اللوحات الإعلانية والجدارية،..), Internet (web pages, online databases,...). الإنترنت (صفحات الويب، قواعد البيانات، ...)	Yes- as a personal effort. نعم كرغبة شخصية	Yes نعم	Yes نعم	Yes نعم	Yes نعم	Yes نعم	Yes نعم	Do not know لا أعلم	Yes نعم	Yes نعم	Yes نعم	Yes نعم	Yes نعم
Agree أوافق	Male ذكر	22	Saudi سعودي	King Abdulaziz University, Jeddah. جامعة الملك عبد العزيز، جدة	Medicine الطب	3rd year السنة الثالثة	3.5-4	It is simulating human attitudes and abilities using computers and technology by teaching machines how humans think, behave, and react toward different situations. هو سلوك وخصائص معينة تتسم بها البرامج الحاسوبية، تجعلها تحاكي القدرات الذهنية البشرية وأنماط عملها.	Academic courses المناهج الدراسية, Print Media (books, magazines, newspapers). وسائل الإعلام المطبوعة (كتب، مجلات، صحف)., Outdoor Media (e.g.Billboards, Transit Ads,..). وسائل الإعلام الخارجية (مثل اللوحات الإعلانية والجدارية،..), Family members. أفراد الأسرة	Yes- as a personal effort. نعم كرغبة شخصية	Yes نعم	Yes نعم	Yes نعم	Yes نعم	Yes نعم	Yes نعم	Yes نعم	Yes نعم	Yes نعم	Yes نعم	Yes نعم	Yes نعم
Agree أوافق	Male ذكر	22	Saudi سعودي	جامعة الملك سعود للعلوم الصحيه بجدة	Occupational Therapy العلاج الوظيفي	4th year السنة الرابعة	4-4.5	It is simulating human attitudes and abilities using computers and technology by teaching machines how humans think, behave, and react toward different situations. هو سلوك وخصائص معينة تتسم بها البرامج الحاسوبية، تجعلها تحاكي القدرات الذهنية البشرية وأنماط عملها.	Broadcast Media (TV, Radio). وسائل الإعلام المرئية (تلفزيون ، راديو), Video games. ألعاب الفيديو, Family members. أفراد الأسرة	Yes- as a personal effort. نعم كرغبة شخصية	Yes نعم	Yes نعم	Yes نعم	No لا	Yes نعم	Yes نعم	No لا	Yes نعم	Yes نعم	Yes نعم	No لا	Yes نعم
Agree أوافق	Male ذكر	21	Saudi سعودي	جامعة الملك سعود للعلوم الصحية بجدة	Occupational Therapy العلاج الوظيفي	3rd year السنة الثالثة	3.5-4	It is simulating human attitudes and abilities using computers and technology by teaching machines how humans think, behave, and react toward different situations. هو سلوك وخصائص معينة تتسم بها البرامج الحاسوبية، تجعلها تحاكي القدرات الذهنية البشرية وأنماط عملها.	Academic courses المناهج الدراسية, Print Media (books, magazines, newspapers). وسائل الإعلام المطبوعة (كتب، مجلات، صحف)., Outdoor Media (e.g.Billboards, Transit Ads,..). وسائل الإعلام الخارجية (مثل اللوحات الإعلانية والجدارية،..), Internet (web pages, online databases,...). الإنترنت (صفحات الويب، قواعد البيانات، ...), Video games. ألعاب الفيديو	No لا	Yes نعم	Yes نعم	Yes نعم	Yes نعم	Yes نعم	Yes نعم	Do not know لا أعلم	Yes نعم	Yes نعم	Do not know لا أعلم	Do not know لا أعلم	Do not know لا أعلم
Agree أوافق	Female أنثى	20	Saudi سعودي	KSAU-HS الحرس	Occupational Therapy العلاج الوظيفي	3rd year السنة الثالثة	>4.5	It is simulating human attitudes and abilities using computers and technology by teaching machines how humans think, behave, and react toward different situations. هو سلوك وخصائص معينة تتسم بها البرامج الحاسوبية، تجعلها تحاكي القدرات الذهنية البشرية وأنماط عملها.	Academic courses المناهج الدراسية, Social Media (Facebook, Instagram, Snapchat, Tweeter,…). وسائل التواصل الاجتماعي, Internet (web pages, online databases,...). الإنترنت (صفحات الويب، قواعد البيانات، ...), Friends. أصدقاء	No لا	Yes نعم	Yes نعم	Yes نعم	Yes نعم	Do not know لا أعلم	Yes نعم	Yes نعم	Yes نعم	No لا	No لا	No لا	No لا
Agree أوافق	Male ذكر	22	Saudi سعودي	جامعه الملك سعود للعلوم الصحيه	Occupational Therapy العلاج الوظيفي	3rd year السنة الثالثة	≤3.5	It is simulating human attitudes and abilities using computers and technology by teaching machines how humans think, behave, and react toward different situations. هو سلوك وخصائص معينة تتسم بها البرامج الحاسوبية، تجعلها تحاكي القدرات الذهنية البشرية وأنماط عملها.	Academic courses المناهج الدراسية, Print Media (books, magazines, newspapers). وسائل الإعلام المطبوعة (كتب، مجلات، صحف)., Social Media (Facebook, Instagram, Snapchat, Tweeter,…). وسائل التواصل الاجتماعي	Yes- as a personal effort. نعم كرغبة شخصية	Yes نعم	Yes نعم	Yes نعم	No لا	Yes نعم	Yes نعم	Yes نعم	Yes نعم	Yes نعم	No لا	No لا	Yes نعم
Agree أوافق	Male ذكر	21	Saudi سعودي	جامعة الملك سعود للعلوم الصحية	Occupational Therapy العلاج الوظيفي	3rd year السنة الثالثة	3.5-4	It is simulating human attitudes and abilities using computers and technology by teaching machines how humans think, behave, and react toward different situations. هو سلوك وخصائص معينة تتسم بها البرامج الحاسوبية، تجعلها تحاكي القدرات الذهنية البشرية وأنماط عملها.	Social Media (Facebook, Instagram, Snapchat, Tweeter,…). وسائل التواصل الاجتماعي, Internet (web pages, online databases,...). الإنترنت (صفحات الويب، قواعد البيانات، ...)	No لا	Do not know لا أعلم	Yes نعم	Do not know لا أعلم	Do not know لا أعلم	Yes نعم	Do not know لا أعلم	No لا	Yes نعم	Yes نعم	No لا	Do not know لا أعلم	Do not know لا أعلم
Agree أوافق	Male ذكر	19	Saudi سعودي	جامعة الملك سعود للعلوم الصحية بجدة	Respiratory Therapy العلاج التنفسي	3rd year السنة الثالثة	>4.5	It is simulating human attitudes and abilities using computers and technology by teaching machines how humans think, behave, and react toward different situations. هو سلوك وخصائص معينة تتسم بها البرامج الحاسوبية، تجعلها تحاكي القدرات الذهنية البشرية وأنماط عملها.	Academic courses المناهج الدراسية, Broadcast Media (TV, Radio). وسائل الإعلام المرئية (تلفزيون ، راديو), Social Media (Facebook, Instagram, Snapchat, Tweeter,…). وسائل التواصل الاجتماعي, Internet (web pages, online databases,...). الإنترنت (صفحات الويب، قواعد البيانات، ...), Video games. ألعاب الفيديو	No لا	Yes نعم	Yes نعم	No لا	Yes نعم	Yes نعم	Yes نعم	Yes نعم	Yes نعم	No لا	Yes نعم	No لا	Yes نعم
Agree أوافق	Male ذكر	20	Saudi سعودي	جامعة الملك سغود بن عبدالعزيز للعلوم الصحية الحرس الوطني	Respiratory Therapy العلاج التنفسي	3rd year السنة الثالثة	3.5-4	It is simulating human attitudes and abilities using computers and technology by teaching machines how humans think, behave, and react toward different situations. هو سلوك وخصائص معينة تتسم بها البرامج الحاسوبية، تجعلها تحاكي القدرات الذهنية البشرية وأنماط عملها.	Social Media (Facebook, Instagram, Snapchat, Tweeter,…). وسائل التواصل الاجتماعي, Internet (web pages, online databases,...). الإنترنت (صفحات الويب، قواعد البيانات، ...), Family members. أفراد الأسرة, Friends. أصدقاء	Yes- as a part of university curriculum. نعم كمنهج دراسي في الجامعة	Yes نعم	Yes نعم	Yes نعم	No لا	Do not know لا أعلم	Yes نعم	No لا	No لا	No لا	Do not know لا أعلم	Do not know لا أعلم	Do not know لا أعلم
Agree أوافق	Male ذكر	20	Saudi سعودي	جامعة الملك سعود بن عبدالعزيز للعلوم الصحية	Respiratory Therapy العلاج التنفسي	3rd year السنة الثالثة	4-4.5	It is simulating human attitudes and abilities using computers and technology by teaching machines how humans think, behave, and react toward different situations. هو سلوك وخصائص معينة تتسم بها البرامج الحاسوبية، تجعلها تحاكي القدرات الذهنية البشرية وأنماط عملها.	Social Media (Facebook, Instagram, Snapchat, Tweeter,…). وسائل التواصل الاجتماعي, Friends. أصدقاء	No لا	Yes نعم	Yes نعم	Yes نعم	Yes نعم	Yes نعم	Do not know لا أعلم	No لا	Yes نعم	No لا	No لا	Yes نعم	No لا
Agree أوافق	Male ذكر	21	Saudi سعودي	جامعة الملك سعود في جدة	Respiratory Therapy العلاج التنفسي	3rd year السنة الثالثة	>4.5	It is simulating human attitudes and abilities using computers and technology by teaching machines how humans think, behave, and react toward different situations. هو سلوك وخصائص معينة تتسم بها البرامج الحاسوبية، تجعلها تحاكي القدرات الذهنية البشرية وأنماط عملها.	Academic courses المناهج الدراسية, Print Media (books, magazines, newspapers). وسائل الإعلام المطبوعة (كتب، مجلات، صحف)., Broadcast Media (TV, Radio). وسائل الإعلام المرئية (تلفزيون ، راديو), Outdoor Media (e.g.Billboards, Transit Ads,..). وسائل الإعلام الخارجية (مثل اللوحات الإعلانية والجدارية،..), Social Media (Facebook, Instagram, Snapchat, Tweeter,…). وسائل التواصل الاجتماعي	No لا	Yes نعم	Yes نعم	Yes نعم	Yes نعم	Yes نعم	Yes نعم	Yes نعم	Yes نعم	No لا	No لا	No لا	Yes نعم
Agree أوافق	Female أنثى	18	Saudi سعودي	Batterjee Medical College, Jeddah. كلية البترجي الطبية، جدة	Preparatory Year السنة التحضيرية	Preparatory Year السنة التحضيرية	≤3.5	It is simulating human attitudes and abilities using computers and technology by teaching machines how humans think, behave, and react toward different situations. هو سلوك وخصائص معينة تتسم بها البرامج الحاسوبية، تجعلها تحاكي القدرات الذهنية البشرية وأنماط عملها.	Academic courses المناهج الدراسية, Broadcast Media (TV, Radio). وسائل الإعلام المرئية (تلفزيون ، راديو), Social Media (Facebook, Instagram, Snapchat, Tweeter,…). وسائل التواصل الاجتماعي, Internet (web pages, online databases,...). الإنترنت (صفحات الويب، قواعد البيانات، ...), Video games. ألعاب الفيديو	No لا	Yes نعم	Do not know لا أعلم	No لا	Do not know لا أعلم	Do not know لا أعلم	Yes نعم	No لا	Yes نعم	Yes نعم	Yes نعم	Do not know لا أعلم	Yes نعم
Agree أوافق	Female أنثى	19	Saudi سعودي	Umm Al Qura University, Makkah. جامعة أم القرى، مكة	طب المختبرات	2nd year السنة الثانية	>4.5	It is simulating human attitudes and abilities using computers and technology by teaching machines how humans think, behave, and react toward different situations. هو سلوك وخصائص معينة تتسم بها البرامج الحاسوبية، تجعلها تحاكي القدرات الذهنية البشرية وأنماط عملها.	Academic courses المناهج الدراسية, Social Media (Facebook, Instagram, Snapchat, Tweeter,…). وسائل التواصل الاجتماعي, Internet (web pages, online databases,...). الإنترنت (صفحات الويب، قواعد البيانات، ...)	No لا	Yes نعم	Do not know لا أعلم	No لا	Yes نعم	Yes نعم	Yes نعم	Yes نعم	No لا	Yes نعم	Yes نعم	Yes نعم	Yes نعم
Agree أوافق	Female أنثى	21	Saudi سعودي	Batterjee Medical College, Jeddah. كلية البترجي الطبية، جدة	Preparatory Year السنة التحضيرية	Preparatory Year السنة التحضيرية	≤3.5	It is simulating human attitudes and abilities using computers and technology by teaching machines how humans think, behave, and react toward different situations. هو سلوك وخصائص معينة تتسم بها البرامج الحاسوبية، تجعلها تحاكي القدرات الذهنية البشرية وأنماط عملها.	Academic courses المناهج الدراسية, Broadcast Media (TV, Radio). وسائل الإعلام المرئية (تلفزيون ، راديو), Social Media (Facebook, Instagram, Snapchat, Tweeter,…). وسائل التواصل الاجتماعي, Video games. ألعاب الفيديو	Yes- as a part of university curriculum. نعم كمنهج دراسي في الجامعة	Yes نعم	Do not know لا أعلم	No لا	Yes نعم	Yes نعم	Do not know لا أعلم	No لا	No لا	Yes نعم	No لا	Yes نعم	Yes نعم
Agree أوافق	Female أنثى	24	Saudi سعودي	Batterjee Medical College, Jeddah. كلية البترجي الطبية، جدة	Preparatory Year السنة التحضيرية	Preparatory Year السنة التحضيرية	3.5-4	It is simulating human attitudes and abilities using computers and technology by teaching machines how humans think, behave, and react toward different situations. هو سلوك وخصائص معينة تتسم بها البرامج الحاسوبية، تجعلها تحاكي القدرات الذهنية البشرية وأنماط عملها.	Academic courses المناهج الدراسية, Social Media (Facebook, Instagram, Snapchat, Tweeter,…). وسائل التواصل الاجتماعي, Internet (web pages, online databases,...). الإنترنت (صفحات الويب، قواعد البيانات، ...), Video games. ألعاب الفيديو	Yes- as a part of university curriculum. نعم كمنهج دراسي في الجامعة	Yes نعم	Yes نعم	Yes نعم	Yes نعم	Yes نعم	Yes نعم	Yes نعم	Yes نعم	Yes نعم	Yes نعم	Yes نعم	Yes نعم
Agree أوافق	Female أنثى	20	Saudi سعودي	King Abdulaziz University, Jeddah. جامعة الملك عبد العزيز، جدة	Radiology الأشعة	1st year السنة الأولى	3.5-4	It is simulating human attitudes and abilities using computers and technology by teaching machines how humans think, behave, and react toward different situations. هو سلوك وخصائص معينة تتسم بها البرامج الحاسوبية، تجعلها تحاكي القدرات الذهنية البشرية وأنماط عملها.	Social Media (Facebook, Instagram, Snapchat, Tweeter,…). وسائل التواصل الاجتماعي	No لا	Yes نعم	Yes نعم	Yes نعم	Yes نعم	Yes نعم	Yes نعم	Yes نعم	Yes نعم	No لا	No لا	No لا	No لا
Agree أوافق	Female أنثى	20	Non-Saudi غير سعودي	Batterjee Medical College, Jeddah. كلية البترجي الطبية، جدة	Medicine الطب	1st year السنة الأولى	4-4.5	It is simulating human attitudes and abilities using computers and technology by teaching machines how humans think, behave, and react toward different situations. هو سلوك وخصائص معينة تتسم بها البرامج الحاسوبية، تجعلها تحاكي القدرات الذهنية البشرية وأنماط عملها.	Broadcast Media (TV, Radio). وسائل الإعلام المرئية (تلفزيون ، راديو), Social Media (Facebook, Instagram, Snapchat, Tweeter,…). وسائل التواصل الاجتماعي, Internet (web pages, online databases,...). الإنترنت (صفحات الويب، قواعد البيانات، ...)	No لا	Yes نعم	Yes نعم	Do not know لا أعلم	Yes نعم	Do not know لا أعلم	Yes نعم	Yes نعم	Yes نعم	No لا	Do not know لا أعلم	Do not know لا أعلم	Do not know لا أعلم
Agree أوافق	Male ذكر	21	Saudi سعودي	ام القرى	Medicine الطب	4th year السنة الرابعة	>4.5	It is simulating human attitudes and abilities using computers and technology by teaching machines how humans think, behave, and react toward different situations. هو سلوك وخصائص معينة تتسم بها البرامج الحاسوبية، تجعلها تحاكي القدرات الذهنية البشرية وأنماط عملها.	Broadcast Media (TV, Radio). وسائل الإعلام المرئية (تلفزيون ، راديو), Social Media (Facebook, Instagram, Snapchat, Tweeter,…). وسائل التواصل الاجتماعي, Internet (web pages, online databases,...). الإنترنت (صفحات الويب، قواعد البيانات، ...)	No لا	Yes نعم	Yes نعم	Yes نعم	Yes نعم	Yes نعم	Yes نعم	Yes نعم	Yes نعم	No لا	No لا	No لا	No لا
Agree أوافق	Male ذكر	22	Saudi سعودي	Umm Al Qura University, Makkah. جامعة أم القرى، مكة	Medicine الطب	4th year السنة الرابعة	>4.5	It is a medical dictionary used by healthcare consumers, students, and professionals. إنه قاموس طبي يستخدمه جمهور الرعاية الصحية والطلاب والمهنيون.	Broadcast Media (TV, Radio). وسائل الإعلام المرئية (تلفزيون ، راديو), Outdoor Media (e.g.Billboards, Transit Ads,..). وسائل الإعلام الخارجية (مثل اللوحات الإعلانية والجدارية،..)	Yes- as a personal effort. نعم كرغبة شخصية	Yes نعم	Do not know لا أعلم	No لا	Yes نعم	Do not know لا أعلم	No لا	Do not know لا أعلم	Yes نعم	No لا	No لا	No لا	Do not know لا أعلم
Agree أوافق	Male ذكر	25	Saudi سعودي	Batterjee Medical College, Jeddah. كلية البترجي الطبية، جدة	Preparatory Year السنة التحضيرية	Preparatory Year السنة التحضيرية	4-4.5	It is simulating human attitudes and abilities using computers and technology by teaching machines how humans think, behave, and react toward different situations. هو سلوك وخصائص معينة تتسم بها البرامج الحاسوبية، تجعلها تحاكي القدرات الذهنية البشرية وأنماط عملها.	Video games. ألعاب الفيديو	Yes- as a part of university curriculum. نعم كمنهج دراسي في الجامعة	No لا	Do not know لا أعلم	No لا	No لا	No لا	Do not know لا أعلم	No لا	No لا	Yes نعم	Yes نعم	Yes نعم	Do not know لا أعلم
Agree أوافق	Female أنثى	19	Saudi سعودي	Batterjee Medical College, Jeddah. كلية البترجي الطبية، جدة	Preparatory Year السنة التحضيرية	Preparatory Year السنة التحضيرية	4-4.5	It is simulating human attitudes and abilities using computers and technology by teaching machines how humans think, behave, and react toward different situations. هو سلوك وخصائص معينة تتسم بها البرامج الحاسوبية، تجعلها تحاكي القدرات الذهنية البشرية وأنماط عملها.	Academic courses المناهج الدراسية, Broadcast Media (TV, Radio). وسائل الإعلام المرئية (تلفزيون ، راديو), Social Media (Facebook, Instagram, Snapchat, Tweeter,…). وسائل التواصل الاجتماعي, Internet (web pages, online databases,...). الإنترنت (صفحات الويب، قواعد البيانات، ...), Video games. ألعاب الفيديو, Family members. أفراد الأسرة, Friends. أصدقاء	Yes- as a part of university curriculum. نعم كمنهج دراسي في الجامعة	Yes نعم	Yes نعم	No لا	Yes نعم	Do not know لا أعلم	Yes نعم	No لا	Yes نعم	Yes نعم	Yes نعم	Do not know لا أعلم	Do not know لا أعلم
Agree أوافق	Female أنثى	20	Saudi سعودي	Batterjee Medical College, Jeddah. كلية البترجي الطبية، جدة	Dentistry طب الأسنان	1st year السنة الأولى	3.5-4	It is simulating human attitudes and abilities using computers and technology by teaching machines how humans think, behave, and react toward different situations. هو سلوك وخصائص معينة تتسم بها البرامج الحاسوبية، تجعلها تحاكي القدرات الذهنية البشرية وأنماط عملها.	Print Media (books, magazines, newspapers). وسائل الإعلام المطبوعة (كتب، مجلات، صحف)., Broadcast Media (TV, Radio). وسائل الإعلام المرئية (تلفزيون ، راديو), Social Media (Facebook, Instagram, Snapchat, Tweeter,…). وسائل التواصل الاجتماعي, Internet (web pages, online databases,...). الإنترنت (صفحات الويب، قواعد البيانات، ...)	No لا	Yes نعم	Yes نعم	Yes نعم	No لا	Do not know لا أعلم	Yes نعم	Yes نعم	Yes نعم	No لا	Do not know لا أعلم	Do not know لا أعلم	Do not know لا أعلم
Agree أوافق	Male ذكر	34	Saudi سعودي	Umm Al Qura University, Makkah. جامعة أم القرى، مكة	Medicine الطب	Postgraduate (e.g. MSc. or PhD) دراسات عليا (ماجستير أو دكتوراه)	≤3.5	It is simulating human attitudes and abilities using computers and technology by teaching machines how humans think, behave, and react toward different situations. هو سلوك وخصائص معينة تتسم بها البرامج الحاسوبية، تجعلها تحاكي القدرات الذهنية البشرية وأنماط عملها.	Social Media (Facebook, Instagram, Snapchat, Tweeter,…). وسائل التواصل الاجتماعي, Internet (web pages, online databases,...). الإنترنت (صفحات الويب، قواعد البيانات، ...), Family members. أفراد الأسرة	Yes- as a personal effort. نعم كرغبة شخصية	Yes نعم	Yes نعم	Yes نعم	Yes نعم	Yes نعم	Yes نعم	Yes نعم	Yes نعم	Yes نعم	No لا	Do not know لا أعلم	Yes نعم
Agree أوافق	Female أنثى	24	Saudi سعودي	كلية الطب بالقنفذة، تابعة لجامعة ام القرى	Medicine الطب	السنة السادسة (في الطب السنة السادسة سنة مستقلة عن سنة الامتياز/internship وتدرّس بالكلية)	3.5-4	It is simulating human attitudes and abilities using computers and technology by teaching machines how humans think, behave, and react toward different situations. هو سلوك وخصائص معينة تتسم بها البرامج الحاسوبية، تجعلها تحاكي القدرات الذهنية البشرية وأنماط عملها.	Social Media (Facebook, Instagram, Snapchat, Tweeter,…). وسائل التواصل الاجتماعي	No لا	Yes نعم	Yes نعم	Yes نعم	No لا	Yes نعم	No لا	No لا	Yes نعم	No لا	Do not know لا أعلم	Do not know لا أعلم	Do not know لا أعلم
Agree أوافق	Female أنثى	22	Saudi سعودي	جامعة المجمعة	Medicine الطب	3rd year السنة الثالثة	3.5-4	It is simulating human attitudes and abilities using computers and technology by teaching machines how humans think, behave, and react toward different situations. هو سلوك وخصائص معينة تتسم بها البرامج الحاسوبية، تجعلها تحاكي القدرات الذهنية البشرية وأنماط عملها.	Academic courses المناهج الدراسية, Print Media (books, magazines, newspapers). وسائل الإعلام المطبوعة (كتب، مجلات، صحف)., Broadcast Media (TV, Radio). وسائل الإعلام المرئية (تلفزيون ، راديو), Outdoor Media (e.g.Billboards, Transit Ads,..). وسائل الإعلام الخارجية (مثل اللوحات الإعلانية والجدارية،..), Social Media (Facebook, Instagram, Snapchat, Tweeter,…). وسائل التواصل الاجتماعي, Internet (web pa…	No لا	Yes نعم	Yes نعم	Yes نعم	Yes نعم	Yes نعم	Yes نعم	Yes نعم	Yes نعم	Yes نعم	Do not know لا أعلم	Yes نعم	Yes نعم
Agree أوافق	Male ذكر	23	Non-Saudi غير سعودي	Batterjee Medical College, Jeddah. كلية البترجي الطبية، جدة	Preparatory Year السنة التحضيرية	Preparatory Year السنة التحضيرية	3.5-4	It is simulating human attitudes and abilities using computers and technology by teaching machines how humans think, behave, and react toward different situations. هو سلوك وخصائص معينة تتسم بها البرامج الحاسوبية، تجعلها تحاكي القدرات الذهنية البشرية وأنماط عملها.	Academic courses المناهج الدراسية	No لا	No لا	No لا	No لا	No لا	No لا	No لا	No لا	No لا	No لا	No لا	No لا	No لا
Agree أوافق	Female أنثى	19	Saudi سعودي	Batterjee Medical College, Jeddah. كلية البترجي الطبية، جدة	Preparatory Year السنة التحضيرية	Preparatory Year السنة التحضيرية	3.5-4	It is simulating human attitudes and abilities using computers and technology by teaching machines how humans think, behave, and react toward different situations. هو سلوك وخصائص معينة تتسم بها البرامج الحاسوبية، تجعلها تحاكي القدرات الذهنية البشرية وأنماط عملها.	Academic courses المناهج الدراسية	No لا	Do not know لا أعلم	Yes نعم	No لا	Yes نعم	No لا	Yes نعم	No لا	No لا	Yes نعم	No لا	No لا	No لا
Agree أوافق	Male ذكر	20	Non-Saudi غير سعودي	Batterjee Medical College, Jeddah. كلية البترجي الطبية، جدة	Preparatory Year السنة التحضيرية	Preparatory Year السنة التحضيرية	>4.5	It is simulating human attitudes and abilities using computers and technology by teaching machines how humans think, behave, and react toward different situations. هو سلوك وخصائص معينة تتسم بها البرامج الحاسوبية، تجعلها تحاكي القدرات الذهنية البشرية وأنماط عملها.	Broadcast Media (TV, Radio). وسائل الإعلام المرئية (تلفزيون ، راديو)	Yes- as a part of university curriculum. نعم كمنهج دراسي في الجامعة	Yes نعم	Yes نعم	Yes نعم	Yes نعم	Do not know لا أعلم	Yes نعم	Yes نعم	Yes نعم	Yes نعم	Yes نعم	Yes نعم	Yes نعم
Agree أوافق	Male ذكر	23	Saudi سعودي	Batterjee Medical College, Jeddah. كلية البترجي الطبية، جدة	Dentistry طب الأسنان	intern إنترن	>4.5	It is a medical dictionary used by healthcare consumers, students, and professionals. إنه قاموس طبي يستخدمه جمهور الرعاية الصحية والطلاب والمهنيون.	Academic courses المناهج الدراسية	Yes- as a part of university curriculum. نعم كمنهج دراسي في الجامعة	Yes نعم	Do not know لا أعلم	Yes نعم	Yes نعم	Yes نعم	Yes نعم	Yes نعم	Yes نعم	Yes نعم	Yes نعم	No لا	No لا
Agree أوافق	Female أنثى	20	Saudi سعودي	Batterjee Medical College, Jeddah. كلية البترجي الطبية، جدة	Dentistry طب الأسنان	1st year السنة الأولى	≤3.5	It is simulating human attitudes and abilities using computers and technology by teaching machines how humans think, behave, and react toward different situations. هو سلوك وخصائص معينة تتسم بها البرامج الحاسوبية، تجعلها تحاكي القدرات الذهنية البشرية وأنماط عملها.	Academic courses المناهج الدراسية, Print Media (books, magazines, newspapers). وسائل الإعلام المطبوعة (كتب، مجلات، صحف)., Broadcast Media (TV, Radio). وسائل الإعلام المرئية (تلفزيون ، راديو), Social Media (Facebook, Instagram, Snapchat, Tweeter,…). وسائل التواصل الاجتماعي, Internet (web pages, online databases,...). الإنترنت (صفحات الويب، قواعد البيانات، ...)	No لا	Yes نعم	Yes نعم	Yes نعم	Yes نعم	No لا	Yes نعم	Yes نعم	Yes نعم	No لا	No لا	Do not know لا أعلم	No لا
Agree أوافق	Male ذكر	22	Non-Saudi غير سعودي	Batterjee Medical College, Jeddah. كلية البترجي الطبية، جدة	Preparatory Year السنة التحضيرية	Preparatory Year السنة التحضيرية	≤3.5	It is simulating human attitudes and abilities using computers and technology by teaching machines how humans think, behave, and react toward different situations. هو سلوك وخصائص معينة تتسم بها البرامج الحاسوبية، تجعلها تحاكي القدرات الذهنية البشرية وأنماط عملها.	Academic courses المناهج الدراسية, Print Media (books, magazines, newspapers). وسائل الإعلام المطبوعة (كتب، مجلات، صحف)., Broadcast Media (TV, Radio). وسائل الإعلام المرئية (تلفزيون ، راديو), Social Media (Facebook, Instagram, Snapchat, Tweeter,…). وسائل التواصل الاجتماعي	Yes- as a part of university curriculum. نعم كمنهج دراسي في الجامعة	Yes نعم	Yes نعم	Yes نعم	No لا	Yes نعم	Yes نعم	No لا	Yes نعم	Yes نعم	Yes نعم	Yes نعم	Yes نعم
Agree أوافق	Female أنثى	21	Saudi سعودي	Batterjee Medical College, Jeddah. كلية البترجي الطبية، جدة	Pharmacy الصيدلة	1st year السنة الأولى	>4.5	It is simulating human attitudes and abilities using computers and technology by teaching machines how humans think, behave, and react toward different situations. هو سلوك وخصائص معينة تتسم بها البرامج الحاسوبية، تجعلها تحاكي القدرات الذهنية البشرية وأنماط عملها.	Internet (web pages, online databases,...). الإنترنت (صفحات الويب، قواعد البيانات، ...), Video games. ألعاب الفيديو, Family members. أفراد الأسرة, Friends. أصدقاء	No لا	Yes نعم	Yes نعم	Do not know لا أعلم	Yes نعم	Do not know لا أعلم	Yes نعم	Yes نعم	Do not know لا أعلم	Yes نعم	Do not know لا أعلم	Do not know لا أعلم	Yes نعم
Agree أوافق	Female أنثى	19	Saudi سعودي	Batterjee Medical College, Jeddah. كلية البترجي الطبية، جدة	Preparatory Year السنة التحضيرية	Preparatory Year السنة التحضيرية	≤3.5	It is simulating human attitudes and abilities using computers and technology by teaching machines how humans think, behave, and react toward different situations. هو سلوك وخصائص معينة تتسم بها البرامج الحاسوبية، تجعلها تحاكي القدرات الذهنية البشرية وأنماط عملها.	Academic courses المناهج الدراسية	Yes- as a part of university curriculum. نعم كمنهج دراسي في الجامعة	Do not know لا أعلم	Yes نعم	No لا	Yes نعم	Yes نعم	Yes نعم	No لا	No لا	Yes نعم	Yes نعم	Do not know لا أعلم	No لا
Agree أوافق	Female أنثى	24	Saudi سعودي	Batterjee Medical College, Jeddah. كلية البترجي الطبية، جدة	Nursing التمريض	4th year السنة الرابعة	3.5-4	It is simulating human attitudes and abilities using computers and technology by teaching machines how humans think, behave, and react toward different situations. هو سلوك وخصائص معينة تتسم بها البرامج الحاسوبية، تجعلها تحاكي القدرات الذهنية البشرية وأنماط عملها.	Academic courses المناهج الدراسية, Print Media (books, magazines, newspapers). وسائل الإعلام المطبوعة (كتب، مجلات، صحف)., Broadcast Media (TV, Radio). وسائل الإعلام المرئية (تلفزيون ، راديو), Outdoor Media (e.g.Billboards, Transit Ads,..). وسائل الإعلام الخارجية (مثل اللوحات الإعلانية والجدارية،..), Social Media (Facebook, Instagram, Snapchat, Tweeter,…). وسائل التواصل الاجتماعي, Internet (web pa…	Yes- as a personal effort. نعم كرغبة شخصية	Yes نعم	Yes نعم	Yes نعم	Yes نعم	Yes نعم	Yes نعم	Yes نعم	Yes نعم	Yes نعم	No لا	Yes نعم	Yes نعم
Agree أوافق	Female أنثى	23	Non-Saudi غير سعودي	Batterjee Medical College, Jeddah. كلية البترجي الطبية، جدة	Physical Therapy العلاج الفيزيائي	4th year السنة الرابعة	>4.5	It is simulating human attitudes and abilities using computers and technology by teaching machines how humans think, behave, and react toward different situations. هو سلوك وخصائص معينة تتسم بها البرامج الحاسوبية، تجعلها تحاكي القدرات الذهنية البشرية وأنماط عملها.	Academic courses المناهج الدراسية, Video games. ألعاب الفيديو	No لا	Yes نعم	Yes نعم	Do not know لا أعلم	No لا	Yes نعم	Yes نعم	No لا	Yes نعم	Do not know لا أعلم	Do not know لا أعلم	Do not know لا أعلم	Do not know لا أعلم
Agree أوافق	Male ذكر	24	Non-Saudi غير سعودي	Batterjee Medical College, Jeddah. كلية البترجي الطبية، جدة	Medicine الطب	5th year السنة الخامسة	4-4.5	It is simulating human attitudes and abilities using computers and technology by teaching machines how humans think, behave, and react toward different situations. هو سلوك وخصائص معينة تتسم بها البرامج الحاسوبية، تجعلها تحاكي القدرات الذهنية البشرية وأنماط عملها.	Print Media (books, magazines, newspapers). وسائل الإعلام المطبوعة (كتب، مجلات، صحف)., Broadcast Media (TV, Radio). وسائل الإعلام المرئية (تلفزيون ، راديو), Social Media (Facebook, Instagram, Snapchat, Tweeter,…). وسائل التواصل الاجتماعي, Internet (web pages, online databases,...). الإنترنت (صفحات الويب، قواعد البيانات، ...), Video games. ألعاب الفيديو, Friends. أصدقاء	No لا	Yes نعم	Yes نعم	Yes نعم	No لا	Yes نعم	Yes نعم	Yes نعم	No لا	No لا	No لا	Yes نعم	Yes نعم
Agree أوافق	Male ذكر	24	Non-Saudi غير سعودي	Batterjee Medical College, Jeddah. كلية البترجي الطبية، جدة	Medicine الطب	5th year السنة الخامسة	4-4.5	It is simulating human attitudes and abilities using computers and technology by teaching machines how humans think, behave, and react toward different situations. هو سلوك وخصائص معينة تتسم بها البرامج الحاسوبية، تجعلها تحاكي القدرات الذهنية البشرية وأنماط عملها.	Academic courses المناهج الدراسية, Outdoor Media (e.g.Billboards, Transit Ads,..). وسائل الإعلام الخارجية (مثل اللوحات الإعلانية والجدارية،..), Social Media (Facebook, Instagram, Snapchat, Tweeter,…). وسائل التواصل الاجتماعي, Internet (web pages, online databases,...). الإنترنت (صفحات الويب، قواعد البيانات، ...), Friends. أصدقاء	No لا	Yes نعم	Do not know لا أعلم	Yes نعم	Yes نعم	No لا	Yes نعم	Yes نعم	Yes نعم	Do not know لا أعلم	No لا	Yes نعم	Yes نعم
Agree أوافق	Female أنثى	25	Saudi سعودي	Batterjee Medical College, Jeddah. كلية البترجي الطبية، جدة	Nursing التمريض	4th year السنة الرابعة	3.5-4	It is simulating human attitudes and abilities using computers and technology by teaching machines how humans think, behave, and react toward different situations. هو سلوك وخصائص معينة تتسم بها البرامج الحاسوبية، تجعلها تحاكي القدرات الذهنية البشرية وأنماط عملها.	Broadcast Media (TV, Radio). وسائل الإعلام المرئية (تلفزيون ، راديو)	No لا	Do not know لا أعلم	Do not know لا أعلم	Yes نعم	Yes نعم	Yes نعم	Yes نعم	No لا	Yes نعم	Yes نعم	No لا	Do not know لا أعلم	No لا
Agree أوافق	Female أنثى	20	Non-Saudi غير سعودي	Batterjee Medical College, Jeddah. كلية البترجي الطبية، جدة	Pharmacy الصيدلة	3rd year السنة الثالثة	4-4.5	It is simulating human attitudes and abilities using computers and technology by teaching machines how humans think, behave, and react toward different situations. هو سلوك وخصائص معينة تتسم بها البرامج الحاسوبية، تجعلها تحاكي القدرات الذهنية البشرية وأنماط عملها.	Social Media (Facebook, Instagram, Snapchat, Tweeter,…). وسائل التواصل الاجتماعي	No لا	Yes نعم	Yes نعم	Yes نعم	Yes نعم	Do not know لا أعلم	Yes نعم	Yes نعم	Yes نعم	Do not know لا أعلم	Do not know لا أعلم	Yes نعم	Do not know لا أعلم
Agree أوافق	Female أنثى	22	Saudi سعودي	Batterjee Medical College, Jeddah. كلية البترجي الطبية، جدة	Pharmacy الصيدلة	3rd year السنة الثالثة	3.5-4	It is simulating human attitudes and abilities using computers and technology by teaching machines how humans think, behave, and react toward different situations. هو سلوك وخصائص معينة تتسم بها البرامج الحاسوبية، تجعلها تحاكي القدرات الذهنية البشرية وأنماط عملها.	Video games. ألعاب الفيديو	No لا	Yes نعم	Yes نعم	Yes نعم	Do not know لا أعلم	Yes نعم	Yes نعم	No لا	Yes نعم	Yes نعم	No لا	No لا	Yes نعم
Agree أوافق	Male ذكر	20	Non-Saudi غير سعودي	Batterjee Medical College, Jeddah. كلية البترجي الطبية، جدة	Medicine الطب	2nd year السنة الثانية	>4.5	It is simulating human attitudes and abilities using computers and technology by teaching machines how humans think, behave, and react toward different situations. هو سلوك وخصائص معينة تتسم بها البرامج الحاسوبية، تجعلها تحاكي القدرات الذهنية البشرية وأنماط عملها.	Print Media (books, magazines, newspapers). وسائل الإعلام المطبوعة (كتب، مجلات، صحف)., Broadcast Media (TV, Radio). وسائل الإعلام المرئية (تلفزيون ، راديو), Outdoor Media (e.g.Billboards, Transit Ads,..). وسائل الإعلام الخارجية (مثل اللوحات الإعلانية والجدارية،..), Social Media (Facebook, Instagram, Snapchat, Tweeter,…). وسائل التواصل الاجتماعي, Internet (web pages, online databases,...). الإنترن…	No لا	Yes نعم	Yes نعم	Yes نعم	Do not know لا أعلم	Yes نعم	Do not know لا أعلم	Yes نعم	Yes نعم	Do not know لا أعلم	Do not know لا أعلم	No لا	No لا
Agree أوافق	Female أنثى	25	Non-Saudi غير سعودي	Batterjee Medical College, Jeddah. كلية البترجي الطبية، جدة	Occupational Therapy العلاج الوظيفي	3rd year السنة الثالثة	≤3.5	It is simulating human attitudes and abilities using computers and technology by teaching machines how humans think, behave, and react toward different situations. هو سلوك وخصائص معينة تتسم بها البرامج الحاسوبية، تجعلها تحاكي القدرات الذهنية البشرية وأنماط عملها.	Academic courses المناهج الدراسية, Print Media (books, magazines, newspapers). وسائل الإعلام المطبوعة (كتب، مجلات، صحف)., Broadcast Media (TV, Radio). وسائل الإعلام المرئية (تلفزيون ، راديو), Outdoor Media (e.g.Billboards, Transit Ads,..). وسائل الإعلام الخارجية (مثل اللوحات الإعلانية والجدارية،..), Social Media (Facebook, Instagram, Snapchat, Tweeter,…). وسائل التواصل الاجتماعي, Internet (web pa…	No لا	Yes نعم	Yes نعم	Yes نعم	Yes نعم	Yes نعم	Yes نعم	Yes نعم	Yes نعم	Yes نعم	No لا	Yes نعم	No لا
Agree أوافق	Female أنثى	21	Saudi سعودي	Batterjee Medical College, Jeddah. كلية البترجي الطبية، جدة	Respiratory Therapy العلاج التنفسي	1st year السنة الأولى	≤3.5	It is a medical dictionary used by healthcare consumers, students, and professionals. إنه قاموس طبي يستخدمه جمهور الرعاية الصحية والطلاب والمهنيون.	Academic courses المناهج الدراسية, Print Media (books, magazines, newspapers). وسائل الإعلام المطبوعة (كتب، مجلات، صحف)., Broadcast Media (TV, Radio). وسائل الإعلام المرئية (تلفزيون ، راديو), Outdoor Media (e.g.Billboards, Transit Ads,..). وسائل الإعلام الخارجية (مثل اللوحات الإعلانية والجدارية،..), Social Media (Facebook, Instagram, Snapchat, Tweeter,…). وسائل التواصل الاجتماعي, Internet (web pa…	No لا	Yes نعم	Yes نعم	Yes نعم	Yes نعم	Yes نعم	Yes نعم	Do not know لا أعلم	Yes نعم	Yes نعم	Do not know لا أعلم	Do not know لا أعلم	Do not know لا أعلم
Agree أوافق	Female أنثى	22	Saudi سعودي	Batterjee Medical College, Jeddah. كلية البترجي الطبية، جدة	Medicine الطب	2nd year السنة الثانية	3.5-4	It is simulating human attitudes and abilities using computers and technology by teaching machines how humans think, behave, and react toward different situations. هو سلوك وخصائص معينة تتسم بها البرامج الحاسوبية، تجعلها تحاكي القدرات الذهنية البشرية وأنماط عملها.	Academic courses المناهج الدراسية, Social Media (Facebook, Instagram, Snapchat, Tweeter,…). وسائل التواصل الاجتماعي, Family members. أفراد الأسرة	No لا	Yes نعم	Yes نعم	Yes نعم	No لا	Do not know لا أعلم	Yes نعم	Yes نعم	Yes نعم	Yes نعم	Yes نعم	Do not know لا أعلم	Yes نعم
Agree أوافق	Male ذكر	21	Saudi سعودي	Batterjee Medical College, Jeddah. كلية البترجي الطبية، جدة	Nursing التمريض	1st year السنة الأولى	≤3.5	It is simulating human attitudes and abilities using computers and technology by teaching machines how humans think, behave, and react toward different situations. هو سلوك وخصائص معينة تتسم بها البرامج الحاسوبية، تجعلها تحاكي القدرات الذهنية البشرية وأنماط عملها.	Academic courses المناهج الدراسية, Internet (web pages, online databases,...). الإنترنت (صفحات الويب، قواعد البيانات، ...), Video games. ألعاب الفيديو, Friends. أصدقاء	Yes- as a personal effort. نعم كرغبة شخصية	Yes نعم	Yes نعم	Yes نعم	Yes نعم	No لا	No لا	No لا	Yes نعم	Yes نعم	Yes نعم	Do not know لا أعلم	Yes نعم
Agree أوافق	Male ذكر	21	Non-Saudi غير سعودي	Batterjee Medical College, Jeddah. كلية البترجي الطبية، جدة	Medicine الطب	2nd year السنة الثانية	3.5-4	It is simulating human attitudes and abilities using computers and technology by teaching machines how humans think, behave, and react toward different situations. هو سلوك وخصائص معينة تتسم بها البرامج الحاسوبية، تجعلها تحاكي القدرات الذهنية البشرية وأنماط عملها.	Social Media (Facebook, Instagram, Snapchat, Tweeter,…). وسائل التواصل الاجتماعي	No لا	Yes نعم	Yes نعم	Yes نعم	Yes نعم	Yes نعم	Yes نعم	Yes نعم	Yes نعم	No لا	No لا	No لا	No لا
Agree أوافق	Female أنثى	21	Non-Saudi غير سعودي	Batterjee Medical College, Jeddah. كلية البترجي الطبية، جدة	Medicine الطب	2nd year السنة الثانية	>4.5	It is simulating human attitudes and abilities using computers and technology by teaching machines how humans think, behave, and react toward different situations. هو سلوك وخصائص معينة تتسم بها البرامج الحاسوبية، تجعلها تحاكي القدرات الذهنية البشرية وأنماط عملها.	Academic courses المناهج الدراسية, Broadcast Media (TV, Radio). وسائل الإعلام المرئية (تلفزيون ، راديو), Social Media (Facebook, Instagram, Snapchat, Tweeter,…). وسائل التواصل الاجتماعي, Family members. أفراد الأسرة	No لا	Do not know لا أعلم	Yes نعم	Do not know لا أعلم	Do not know لا أعلم	No لا	Yes نعم	Do not know لا أعلم	Yes نعم	No لا	No لا	No لا	Yes نعم
Agree أوافق	Male ذكر	20	Saudi سعودي	جامعة شقراء كلية الطب	Medicine الطب	2nd year السنة الثانية	>4.5	It is simulating human attitudes and abilities using computers and technology by teaching machines how humans think, behave, and react toward different situations. هو سلوك وخصائص معينة تتسم بها البرامج الحاسوبية، تجعلها تحاكي القدرات الذهنية البشرية وأنماط عملها.	Broadcast Media (TV, Radio). وسائل الإعلام المرئية (تلفزيون ، راديو), Outdoor Media (e.g.Billboards, Transit Ads,..). وسائل الإعلام الخارجية (مثل اللوحات الإعلانية والجدارية،..), Social Media (Facebook, Instagram, Snapchat, Tweeter,…). وسائل التواصل الاجتماعي, Internet (web pages, online databases,...). الإنترنت (صفحات الويب، قواعد البيانات، ...), Video games. ألعاب الفيديو, Family members. أفراد…	No لا	Yes نعم	Yes نعم	Yes نعم	Do not know لا أعلم	Do not know لا أعلم	Yes نعم	No لا	Yes نعم	Yes نعم	Yes نعم	Do not know لا أعلم	Yes نعم
Agree أوافق	Female أنثى	19	Non-Saudi غير سعودي	Batterjee Medical College, Jeddah. كلية البترجي الطبية، جدة	Medicine الطب	1st year السنة الأولى	>4.5	It is simulating human attitudes and abilities using computers and technology by teaching machines how humans think, behave, and react toward different situations. هو سلوك وخصائص معينة تتسم بها البرامج الحاسوبية، تجعلها تحاكي القدرات الذهنية البشرية وأنماط عملها.	Social Media (Facebook, Instagram, Snapchat, Tweeter,…). وسائل التواصل الاجتماعي, Internet (web pages, online databases,...). الإنترنت (صفحات الويب، قواعد البيانات، ...)	No لا	Yes نعم	Yes نعم	Yes نعم	Yes نعم	Do not know لا أعلم	Yes نعم	Yes نعم	Yes نعم	No لا	Do not know لا أعلم	No لا	Do not know لا أعلم
Agree أوافق	Female أنثى	20	Saudi سعودي	Batterjee Medical College, Jeddah. كلية البترجي الطبية، جدة	Medicine الطب	1st year السنة الأولى	>4.5	It is simulating human attitudes and abilities using computers and technology by teaching machines how humans think, behave, and react toward different situations. هو سلوك وخصائص معينة تتسم بها البرامج الحاسوبية، تجعلها تحاكي القدرات الذهنية البشرية وأنماط عملها.	Academic courses المناهج الدراسية, Broadcast Media (TV, Radio). وسائل الإعلام المرئية (تلفزيون ، راديو), Social Media (Facebook, Instagram, Snapchat, Tweeter,…). وسائل التواصل الاجتماعي, Friends. أصدقاء	No لا	Yes نعم	Yes نعم	Yes نعم	Yes نعم	Yes نعم	Yes نعم	No لا	Yes نعم	No لا	No لا	Yes نعم	No لا
Agree أوافق	Female أنثى	20	Saudi سعودي	Batterjee Medical College, Jeddah. كلية البترجي الطبية، جدة	Respiratory Therapy العلاج التنفسي	2nd year السنة الثانية	≤3.5	It is simulating human attitudes and abilities using computers and technology by teaching machines how humans think, behave, and react toward different situations. هو سلوك وخصائص معينة تتسم بها البرامج الحاسوبية، تجعلها تحاكي القدرات الذهنية البشرية وأنماط عملها.	Broadcast Media (TV, Radio). وسائل الإعلام المرئية (تلفزيون ، راديو)	No لا	Yes نعم	Yes نعم	Do not know لا أعلم	No لا	Do not know لا أعلم	Do not know لا أعلم	No لا	Do not know لا أعلم	Do not know لا أعلم	Yes نعم	Do not know لا أعلم	Yes نعم
Agree أوافق	Female أنثى	21	Saudi سعودي	Batterjee Medical College, Jeddah. كلية البترجي الطبية، جدة	Respiratory Therapy العلاج التنفسي	2nd year السنة الثانية	≤3.5	It is simulating human attitudes and abilities using computers and technology by teaching machines how humans think, behave, and react toward different situations. هو سلوك وخصائص معينة تتسم بها البرامج الحاسوبية، تجعلها تحاكي القدرات الذهنية البشرية وأنماط عملها.	Print Media (books, magazines, newspapers). وسائل الإعلام المطبوعة (كتب، مجلات، صحف)., Broadcast Media (TV, Radio). وسائل الإعلام المرئية (تلفزيون ، راديو)	No لا	Yes نعم	Yes نعم	Yes نعم	Yes نعم	Yes نعم	Do not know لا أعلم	No لا	No لا	No لا	Yes نعم	No لا	No لا
Agree أوافق	Female أنثى	21	Saudi سعودي	Batterjee Medical College, Jeddah. كلية البترجي الطبية، جدة	Respiratory Therapy العلاج التنفسي	2nd year السنة الثانية	3.5-4	It is simulating human attitudes and abilities using computers and technology by teaching machines how humans think, behave, and react toward different situations. هو سلوك وخصائص معينة تتسم بها البرامج الحاسوبية، تجعلها تحاكي القدرات الذهنية البشرية وأنماط عملها.	Social Media (Facebook, Instagram, Snapchat, Tweeter,…). وسائل التواصل الاجتماعي	No لا	No لا	Yes نعم	No لا	Do not know لا أعلم	Yes نعم	No لا	No لا	No لا	No لا	Do not know لا أعلم	Do not know لا أعلم	Do not know لا أعلم
Agree أوافق	Male ذكر	20	Saudi سعودي	جامعة شقراء	Medicine الطب	2nd year السنة الثانية	3.5-4	It is simulating human attitudes and abilities using computers and technology by teaching machines how humans think, behave, and react toward different situations. هو سلوك وخصائص معينة تتسم بها البرامج الحاسوبية، تجعلها تحاكي القدرات الذهنية البشرية وأنماط عملها.	Academic courses المناهج الدراسية, Print Media (books, magazines, newspapers). وسائل الإعلام المطبوعة (كتب، مجلات، صحف)., Broadcast Media (TV, Radio). وسائل الإعلام المرئية (تلفزيون ، راديو), Outdoor Media (e.g.Billboards, Transit Ads,..). وسائل الإعلام الخارجية (مثل اللوحات الإعلانية والجدارية،..), Social Media (Facebook, Instagram, Snapchat, Tweeter,…). وسائل التواصل الاجتماعي, Internet (web pa…	No لا	Yes نعم	Yes نعم	Yes نعم	Yes نعم	Do not know لا أعلم	Yes نعم	Yes نعم	Yes نعم	No لا	Do not know لا أعلم	Do not know لا أعلم	Do not know لا أعلم
Agree أوافق	Female أنثى	18	Saudi سعودي	Batterjee Medical College, Jeddah. كلية البترجي الطبية، جدة	Preparatory Year السنة التحضيرية	Preparatory Year السنة التحضيرية	3.5-4	It is simulating human attitudes and abilities using computers and technology by teaching machines how humans think, behave, and react toward different situations. هو سلوك وخصائص معينة تتسم بها البرامج الحاسوبية، تجعلها تحاكي القدرات الذهنية البشرية وأنماط عملها.	Academic courses المناهج الدراسية	No لا	Yes نعم	Yes نعم	Yes نعم	Yes نعم	Do not know لا أعلم	Yes نعم	No لا	No لا	Do not know لا أعلم	Yes نعم	Yes نعم	Yes نعم
Agree أوافق	Female أنثى	19	Saudi سعودي	Batterjee Medical College, Jeddah. كلية البترجي الطبية، جدة	Medicine الطب	1st year السنة الأولى	>4.5	It is simulating human attitudes and abilities using computers and technology by teaching machines how humans think, behave, and react toward different situations. هو سلوك وخصائص معينة تتسم بها البرامج الحاسوبية، تجعلها تحاكي القدرات الذهنية البشرية وأنماط عملها.	Broadcast Media (TV, Radio). وسائل الإعلام المرئية (تلفزيون ، راديو), Social Media (Facebook, Instagram, Snapchat, Tweeter,…). وسائل التواصل الاجتماعي, Internet (web pages, online databases,...). الإنترنت (صفحات الويب، قواعد البيانات، ...), Video games. ألعاب الفيديو	No لا	No لا	No لا	No لا	Yes نعم	No لا	No لا	No لا	No لا	Yes نعم	No لا	Yes نعم	Yes نعم
Agree أوافق	Female أنثى	21	Saudi سعودي	Batterjee Medical College, Jeddah. كلية البترجي الطبية، جدة	Respiratory Therapy العلاج التنفسي	2nd year السنة الثانية	3.5-4	It is simulating human attitudes and abilities using computers and technology by teaching machines how humans think, behave, and react toward different situations. هو سلوك وخصائص معينة تتسم بها البرامج الحاسوبية، تجعلها تحاكي القدرات الذهنية البشرية وأنماط عملها.	Social Media (Facebook, Instagram, Snapchat, Tweeter,…). وسائل التواصل الاجتماعي	No لا	Yes نعم	Yes نعم	Yes نعم	Yes نعم	No لا	Yes نعم	Yes نعم	Yes نعم	Yes نعم	No لا	No لا	Yes نعم
Agree أوافق	Female أنثى	19	Saudi سعودي	جامعه شقراء - Shaqra University	Nursing التمريض	1st year السنة الأولى	≤3.5	It is simulating human attitudes and abilities using computers and technology by teaching machines how humans think, behave, and react toward different situations. هو سلوك وخصائص معينة تتسم بها البرامج الحاسوبية، تجعلها تحاكي القدرات الذهنية البشرية وأنماط عملها.	Broadcast Media (TV, Radio). وسائل الإعلام المرئية (تلفزيون ، راديو), Social Media (Facebook, Instagram, Snapchat, Tweeter,…). وسائل التواصل الاجتماعي	Yes- as a personal effort. نعم كرغبة شخصية	Yes نعم	Yes نعم	Yes نعم	Yes نعم	Do not know لا أعلم	Yes نعم	Yes نعم	Yes نعم	Yes نعم	Yes نعم	Yes نعم	Do not know لا أعلم
Agree أوافق	Female أنثى	20	Saudi سعودي	Batterjee Medical College, Jeddah. كلية البترجي الطبية، جدة	Medicine الطب	1st year السنة الأولى	>4.5	It is simulating human attitudes and abilities using computers and technology by teaching machines how humans think, behave, and react toward different situations. هو سلوك وخصائص معينة تتسم بها البرامج الحاسوبية، تجعلها تحاكي القدرات الذهنية البشرية وأنماط عملها.	Social Media (Facebook, Instagram, Snapchat, Tweeter,…). وسائل التواصل الاجتماعي, Internet (web pages, online databases,...). الإنترنت (صفحات الويب، قواعد البيانات، ...)	No لا	Yes نعم	Yes نعم	Yes نعم	Yes نعم	No لا	Yes نعم	Yes نعم	Yes نعم	No لا	No لا	No لا	No لا
Agree أوافق	Female أنثى	19	Saudi سعودي	King Abdulaziz University, Jeddah. جامعة الملك عبد العزيز، جدة	Medicine الطب	2nd year السنة الثانية	>4.5	It is simulating human attitudes and abilities using computers and technology by teaching machines how humans think, behave, and react toward different situations. هو سلوك وخصائص معينة تتسم بها البرامج الحاسوبية، تجعلها تحاكي القدرات الذهنية البشرية وأنماط عملها.	Academic courses المناهج الدراسية, Social Media (Facebook, Instagram, Snapchat, Tweeter,…). وسائل التواصل الاجتماعي, Internet (web pages, online databases,...). الإنترنت (صفحات الويب، قواعد البيانات، ...), Video games. ألعاب الفيديو, Family members. أفراد الأسرة, Friends. أصدقاء	Yes- as a part of university curriculum. نعم كمنهج دراسي في الجامعة	Yes نعم	Yes نعم	Yes نعم	Yes نعم	No لا	Yes نعم	No لا	Yes نعم	Yes نعم	No لا	No لا	Yes نعم
Agree أوافق	Female أنثى	21	Saudi سعودي	King Saud University, Riyadh. جامعة الملك سعود، الرياض	Medicine الطب	3rd year السنة الثالثة	>4.5	It is simulating human attitudes and abilities using computers and technology by teaching machines how humans think, behave, and react toward different situations. هو سلوك وخصائص معينة تتسم بها البرامج الحاسوبية، تجعلها تحاكي القدرات الذهنية البشرية وأنماط عملها.	Broadcast Media (TV, Radio). وسائل الإعلام المرئية (تلفزيون ، راديو), Outdoor Media (e.g.Billboards, Transit Ads,..). وسائل الإعلام الخارجية (مثل اللوحات الإعلانية والجدارية،..), Social Media (Facebook, Instagram, Snapchat, Tweeter,…). وسائل التواصل الاجتماعي	Yes- as a personal effort. نعم كرغبة شخصية	Yes نعم	Yes نعم	Yes نعم	Do not know لا أعلم	Yes نعم	Yes نعم	Yes نعم	Yes نعم	No لا	Do not know لا أعلم	Yes نعم	Yes نعم
Agree أوافق	Female أنثى	18	Non-Saudi غير سعودي	Batterjee Medical College, Jeddah. كلية البترجي الطبية، جدة	Medicine الطب	1st year السنة الأولى	>4.5	It is simulating human attitudes and abilities using computers and technology by teaching machines how humans think, behave, and react toward different situations. هو سلوك وخصائص معينة تتسم بها البرامج الحاسوبية، تجعلها تحاكي القدرات الذهنية البشرية وأنماط عملها.	Broadcast Media (TV, Radio). وسائل الإعلام المرئية (تلفزيون ، راديو), Social Media (Facebook, Instagram, Snapchat, Tweeter,…). وسائل التواصل الاجتماعي, Internet (web pages, online databases,...). الإنترنت (صفحات الويب، قواعد البيانات، ...)	No لا	Yes نعم	Do not know لا أعلم	Yes نعم	Yes نعم	Yes نعم	Yes نعم	No لا	Yes نعم	Do not know لا أعلم	No لا	No لا	No لا
Agree أوافق	Male ذكر	19	Saudi سعودي	جامعة شقراء	Preparatory Year السنة التحضيرية	Preparatory Year السنة التحضيرية	>4.5	It is simulating human attitudes and abilities using computers and technology by teaching machines how humans think, behave, and react toward different situations. هو سلوك وخصائص معينة تتسم بها البرامج الحاسوبية، تجعلها تحاكي القدرات الذهنية البشرية وأنماط عملها.	Print Media (books, magazines, newspapers). وسائل الإعلام المطبوعة (كتب، مجلات، صحف)., Family members. أفراد الأسرة	Yes- as a personal effort. نعم كرغبة شخصية	Yes نعم	No لا	No لا	No لا	No لا	No لا	Do not know لا أعلم	Do not know لا أعلم	No لا	Yes نعم	Yes نعم	No لا
Agree أوافق	Female أنثى	18	Saudi سعودي	جامعة شقراء	Pharmacy الصيدلة	Preparatory Year السنة التحضيرية	≤3.5	It is simulating human attitudes and abilities using computers and technology by teaching machines how humans think, behave, and react toward different situations. هو سلوك وخصائص معينة تتسم بها البرامج الحاسوبية، تجعلها تحاكي القدرات الذهنية البشرية وأنماط عملها.	Academic courses المناهج الدراسية, Print Media (books, magazines, newspapers). وسائل الإعلام المطبوعة (كتب، مجلات، صحف).	No لا	Yes نعم	No لا	Do not know لا أعلم	Do not know لا أعلم	Do not know لا أعلم	Do not know لا أعلم	Do not know لا أعلم	Do not know لا أعلم	Do not know لا أعلم	Yes نعم	Do not know لا أعلم	Do not know لا أعلم
Agree أوافق	Male ذكر	19	Saudi سعودي	جامعة شقراء	Medicine الطب	Preparatory Year السنة التحضيرية	>4.5	It is simulating human attitudes and abilities using computers and technology by teaching machines how humans think, behave, and react toward different situations. هو سلوك وخصائص معينة تتسم بها البرامج الحاسوبية، تجعلها تحاكي القدرات الذهنية البشرية وأنماط عملها.	Academic courses المناهج الدراسية, Broadcast Media (TV, Radio). وسائل الإعلام المرئية (تلفزيون ، راديو), Social Media (Facebook, Instagram, Snapchat, Tweeter,…). وسائل التواصل الاجتماعي, Internet (web pages, online databases,...). الإنترنت (صفحات الويب، قواعد البيانات، ...), Family members. أفراد الأسرة, Friends. أصدقاء	No لا	Yes نعم	Yes نعم	Yes نعم	Yes نعم	Yes نعم	Yes نعم	Yes نعم	Yes نعم	Do not know لا أعلم	Do not know لا أعلم	No لا	Do not know لا أعلم
Agree أوافق	Female أنثى	23	Saudi سعودي	Batterjee Medical College, Jeddah. كلية البترجي الطبية، جدة	Medicine الطب	4th year السنة الرابعة	≤3.5	It is simulating human attitudes and abilities using computers and technology by teaching machines how humans think, behave, and react toward different situations. هو سلوك وخصائص معينة تتسم بها البرامج الحاسوبية، تجعلها تحاكي القدرات الذهنية البشرية وأنماط عملها.	Print Media (books, magazines, newspapers). وسائل الإعلام المطبوعة (كتب، مجلات، صحف).	Yes- as a personal effort. نعم كرغبة شخصية	No لا	Do not know لا أعلم	Do not know لا أعلم	Do not know لا أعلم	Do not know لا أعلم	Do not know لا أعلم	Do not know لا أعلم	Do not know لا أعلم	Yes نعم	Do not know لا أعلم	Do not know لا أعلم	Do not know لا أعلم
Agree أوافق	Female أنثى	21	Non-Saudi غير سعودي	Batterjee Medical College, Jeddah. كلية البترجي الطبية، جدة	Medicine الطب	4th year السنة الرابعة	>4.5	It is simulating human attitudes and abilities using computers and technology by teaching machines how humans think, behave, and react toward different situations. هو سلوك وخصائص معينة تتسم بها البرامج الحاسوبية، تجعلها تحاكي القدرات الذهنية البشرية وأنماط عملها.	Academic courses المناهج الدراسية, Print Media (books, magazines, newspapers). وسائل الإعلام المطبوعة (كتب، مجلات، صحف)., Broadcast Media (TV, Radio). وسائل الإعلام المرئية (تلفزيون ، راديو), Outdoor Media (e.g.Billboards, Transit Ads,..). وسائل الإعلام الخارجية (مثل اللوحات الإعلانية والجدارية،..), Social Media (Facebook, Instagram, Snapchat, Tweeter,…). وسائل التواصل الاجتماعي, Internet (web pa…	Yes- as a personal effort. نعم كرغبة شخصية	Yes نعم	Yes نعم	Yes نعم	Yes نعم	Yes نعم	Yes نعم	No لا	Yes نعم	Yes نعم	Yes نعم	Yes نعم	Yes نعم
Agree أوافق	Female أنثى	21	Non-Saudi غير سعودي	Batterjee Medical College, Jeddah. كلية البترجي الطبية، جدة	Medicine الطب	3rd year السنة الثالثة	≤3.5	It is simulating human attitudes and abilities using computers and technology by teaching machines how humans think, behave, and react toward different situations. هو سلوك وخصائص معينة تتسم بها البرامج الحاسوبية، تجعلها تحاكي القدرات الذهنية البشرية وأنماط عملها.	Social Media (Facebook, Instagram, Snapchat, Tweeter,…). وسائل التواصل الاجتماعي, Internet (web pages, online databases,...). الإنترنت (صفحات الويب، قواعد البيانات، ...)	No لا	Yes نعم	Yes نعم	Yes نعم	Do not know لا أعلم	Do not know لا أعلم	Yes نعم	No لا	Yes نعم	No لا	Yes نعم	No لا	Yes نعم
Agree أوافق	Female أنثى	20	Saudi سعودي	Batterjee Medical College, Jeddah. كلية البترجي الطبية، جدة	Nursing التمريض	3rd year السنة الثالثة	3.5-4	It is simulating human attitudes and abilities using computers and technology by teaching machines how humans think, behave, and react toward different situations. هو سلوك وخصائص معينة تتسم بها البرامج الحاسوبية، تجعلها تحاكي القدرات الذهنية البشرية وأنماط عملها.	Social Media (Facebook, Instagram, Snapchat, Tweeter,…). وسائل التواصل الاجتماعي, Internet (web pages, online databases,...). الإنترنت (صفحات الويب، قواعد البيانات، ...), Video games. ألعاب الفيديو	No لا	Yes نعم	Yes نعم	Yes نعم	Yes نعم	Yes نعم	Yes نعم	No لا	Yes نعم	No لا	Do not know لا أعلم	Yes نعم	Yes نعم
Agree أوافق	Female أنثى	20	Saudi سعودي	Batterjee Medical College, Jeddah. كلية البترجي الطبية، جدة	Nursing التمريض	3rd year السنة الثالثة	4-4.5	It is simulating human attitudes and abilities using computers and technology by teaching machines how humans think, behave, and react toward different situations. هو سلوك وخصائص معينة تتسم بها البرامج الحاسوبية، تجعلها تحاكي القدرات الذهنية البشرية وأنماط عملها.	Social Media (Facebook, Instagram, Snapchat, Tweeter,…). وسائل التواصل الاجتماعي, Internet (web pages, online databases,...). الإنترنت (صفحات الويب، قواعد البيانات، ...), Family members. أفراد الأسرة	No لا	Yes نعم	Do not know لا أعلم	Yes نعم	Yes نعم	Yes نعم	Yes نعم	No لا	No لا	No لا	Yes نعم	Yes نعم	Yes نعم
Agree أوافق	Male ذكر	19	Non-Saudi غير سعودي	Batterjee Medical College, Jeddah. كلية البترجي الطبية، جدة	Medicine الطب	2nd year السنة الثانية	4-4.5	It is simulating human attitudes and abilities using computers and technology by teaching machines how humans think, behave, and react toward different situations. هو سلوك وخصائص معينة تتسم بها البرامج الحاسوبية، تجعلها تحاكي القدرات الذهنية البشرية وأنماط عملها.	Social Media (Facebook, Instagram, Snapchat, Tweeter,…). وسائل التواصل الاجتماعي, Internet (web pages, online databases,...). الإنترنت (صفحات الويب، قواعد البيانات، ...), Video games. ألعاب الفيديو	No لا	Yes نعم	Do not know لا أعلم	Yes نعم	Yes نعم	Do not know لا أعلم	Do not know لا أعلم	Yes نعم	Yes نعم	No لا	No لا	Yes نعم	No لا
Agree أوافق	Male ذكر	22	Saudi سعودي	Batterjee Medical College, Jeddah. كلية البترجي الطبية، جدة	Medicine الطب	2nd year السنة الثانية	4-4.5	It is simulating human attitudes and abilities using computers and technology by teaching machines how humans think, behave, and react toward different situations. هو سلوك وخصائص معينة تتسم بها البرامج الحاسوبية، تجعلها تحاكي القدرات الذهنية البشرية وأنماط عملها.	Broadcast Media (TV, Radio). وسائل الإعلام المرئية (تلفزيون ، راديو), Social Media (Facebook, Instagram, Snapchat, Tweeter,…). وسائل التواصل الاجتماعي, Video games. ألعاب الفيديو, Friends. أصدقاء	No لا	Yes نعم	Yes نعم	Yes نعم	Do not know لا أعلم	Yes نعم	Yes نعم	Do not know لا أعلم	Do not know لا أعلم	Do not know لا أعلم	No لا	Do not know لا أعلم	Yes نعم
Agree أوافق	Female أنثى	21	Non-Saudi غير سعودي	Batterjee Medical College, Jeddah. كلية البترجي الطبية، جدة	Medicine الطب	2nd year السنة الثانية	4-4.5	It is simulating human attitudes and abilities using computers and technology by teaching machines how humans think, behave, and react toward different situations. هو سلوك وخصائص معينة تتسم بها البرامج الحاسوبية، تجعلها تحاكي القدرات الذهنية البشرية وأنماط عملها.	Internet (web pages, online databases,...). الإنترنت (صفحات الويب، قواعد البيانات، ...)	No لا	Yes نعم	Yes نعم	Yes نعم	No لا	Yes نعم	Yes نعم	Yes نعم	Yes نعم	No لا	Yes نعم	No لا	Yes نعم
Agree أوافق	Female أنثى	21	Saudi سعودي	Umm Al Qura University, Makkah. جامعة أم القرى، مكة	Medicine الطب	3rd year السنة الثالثة	4-4.5	It is simulating human attitudes and abilities using computers and technology by teaching machines how humans think, behave, and react toward different situations. هو سلوك وخصائص معينة تتسم بها البرامج الحاسوبية، تجعلها تحاكي القدرات الذهنية البشرية وأنماط عملها.	Academic courses المناهج الدراسية, Print Media (books, magazines, newspapers). وسائل الإعلام المطبوعة (كتب، مجلات، صحف)., Outdoor Media (e.g.Billboards, Transit Ads,..). وسائل الإعلام الخارجية (مثل اللوحات الإعلانية والجدارية،..), Social Media (Facebook, Instagram, Snapchat, Tweeter,…). وسائل التواصل الاجتماعي, Internet (web pages, online databases,...). الإنترنت (صفحات الويب، قواعد البيانات، ...…	No لا	Yes نعم	Yes نعم	Yes نعم	Yes نعم	Yes نعم	Yes نعم	No لا	Yes نعم	No لا	No لا	No لا	No لا
Agree أوافق	Female أنثى	19	Saudi سعودي	Umm Al Qura University, Makkah. جامعة أم القرى، مكة	Medicine الطب	3rd year السنة الثالثة	≤3.5	It is simulating human attitudes and abilities using computers and technology by teaching machines how humans think, behave, and react toward different situations. هو سلوك وخصائص معينة تتسم بها البرامج الحاسوبية، تجعلها تحاكي القدرات الذهنية البشرية وأنماط عملها.	Social Media (Facebook, Instagram, Snapchat, Tweeter,…). وسائل التواصل الاجتماعي	No لا	Yes نعم	Do not know لا أعلم	Yes نعم	Yes نعم	No لا	Yes نعم	Yes نعم	Yes نعم	No لا	No لا	No لا	No لا
Agree أوافق	Female أنثى	20	Saudi سعودي	Umm Al Qura University, Makkah. جامعة أم القرى، مكة	Medicine الطب	3rd year السنة الثالثة	4-4.5	It is simulating human attitudes and abilities using computers and technology by teaching machines how humans think, behave, and react toward different situations. هو سلوك وخصائص معينة تتسم بها البرامج الحاسوبية، تجعلها تحاكي القدرات الذهنية البشرية وأنماط عملها.	Academic courses المناهج الدراسية, Print Media (books, magazines, newspapers). وسائل الإعلام المطبوعة (كتب، مجلات، صحف)., Social Media (Facebook, Instagram, Snapchat, Tweeter,…). وسائل التواصل الاجتماعي, Internet (web pages, online databases,...). الإنترنت (صفحات الويب، قواعد البيانات، ...), Family members. أفراد الأسرة	No لا	Yes نعم	Do not know لا أعلم	Do not know لا أعلم	Do not know لا أعلم	No لا	Do not know لا أعلم	No لا	Do not know لا أعلم	Yes نعم	Do not know لا أعلم	Do not know لا أعلم	Yes نعم
Agree أوافق	Female أنثى	20	Saudi سعودي	Umm Al Qura University, Makkah. جامعة أم القرى، مكة	Medicine الطب	3rd year السنة الثالثة	>4.5	It is simulating human attitudes and abilities using computers and technology by teaching machines how humans think, behave, and react toward different situations. هو سلوك وخصائص معينة تتسم بها البرامج الحاسوبية، تجعلها تحاكي القدرات الذهنية البشرية وأنماط عملها.	Academic courses المناهج الدراسية, Print Media (books, magazines, newspapers). وسائل الإعلام المطبوعة (كتب، مجلات، صحف)., Social Media (Facebook, Instagram, Snapchat, Tweeter,…). وسائل التواصل الاجتماعي	No لا	Do not know لا أعلم	Yes نعم	Yes نعم	No لا	Yes نعم	Yes نعم	Yes نعم	Yes نعم	Do not know لا أعلم	Do not know لا أعلم	Do not know لا أعلم	Do not know لا أعلم
Agree أوافق	Female أنثى	20	Saudi سعودي	Umm Al Qura University, Makkah. جامعة أم القرى، مكة	Medicine الطب	4th year السنة الرابعة	3.5-4	It is simulating human attitudes and abilities using computers and technology by teaching machines how humans think, behave, and react toward different situations. هو سلوك وخصائص معينة تتسم بها البرامج الحاسوبية، تجعلها تحاكي القدرات الذهنية البشرية وأنماط عملها.	Broadcast Media (TV, Radio). وسائل الإعلام المرئية (تلفزيون ، راديو), Social Media (Facebook, Instagram, Snapchat, Tweeter,…). وسائل التواصل الاجتماعي, Internet (web pages, online databases,...). الإنترنت (صفحات الويب، قواعد البيانات، ...), Friends. أصدقاء	No لا	Yes نعم	Yes نعم	Do not know لا أعلم	Yes نعم	Yes نعم	Yes نعم	No لا	Do not know لا أعلم	No لا	Do not know لا أعلم	Do not know لا أعلم	Do not know لا أعلم
Agree أوافق	Female أنثى	22	Saudi سعودي	فيصل احساء .	Medicine الطب	3rd year السنة الثالثة	3.5-4	It is a type of medical drug used to improve intelligence, but it causes side effects such as skin rashes. هو نوع من الأدوية الطبية يستخدم لتحسين الذكاء ، لكنه يسبب آثارًا جانبية مثل الطفح الجلدي	Academic courses المناهج الدراسية	No لا	Do not know لا أعلم	Do not know لا أعلم	Do not know لا أعلم	Do not know لا أعلم	Do not know لا أعلم	Do not know لا أعلم	Do not know لا أعلم	Do not know لا أعلم	Do not know لا أعلم	Do not know لا أعلم	Do not know لا أعلم	Do not know لا أعلم
Agree أوافق	Male ذكر	23	Saudi سعودي	جامعة الباحة	Medicine الطب	5th year السنة الخامسة	>4.5	It is simulating human attitudes and abilities using computers and technology by teaching machines how humans think, behave, and react toward different situations. هو سلوك وخصائص معينة تتسم بها البرامج الحاسوبية، تجعلها تحاكي القدرات الذهنية البشرية وأنماط عملها.	Academic courses المناهج الدراسية, Print Media (books, magazines, newspapers). وسائل الإعلام المطبوعة (كتب، مجلات، صحف)., Broadcast Media (TV, Radio). وسائل الإعلام المرئية (تلفزيون ، راديو), Outdoor Media (e.g.Billboards, Transit Ads,..). وسائل الإعلام الخارجية (مثل اللوحات الإعلانية والجدارية،..), Social Media (Facebook, Instagram, Snapchat, Tweeter,…). وسائل التواصل الاجتماعي, Internet (web pa…	No لا	Yes نعم	Do not know لا أعلم	Yes نعم	No لا	No لا	Yes نعم	Yes نعم	Yes نعم	No لا	Yes نعم	Yes نعم	Yes نعم
Agree أوافق	Male ذكر	21	Saudi سعودي	Jeddah Unoversity, Jeddah. جامعة جدة، جدة	Medicine الطب	4th year السنة الرابعة	>4.5	It is simulating human attitudes and abilities using computers and technology by teaching machines how humans think, behave, and react toward different situations. هو سلوك وخصائص معينة تتسم بها البرامج الحاسوبية، تجعلها تحاكي القدرات الذهنية البشرية وأنماط عملها.	Print Media (books, magazines, newspapers). وسائل الإعلام المطبوعة (كتب، مجلات، صحف)., Broadcast Media (TV, Radio). وسائل الإعلام المرئية (تلفزيون ، راديو), Outdoor Media (e.g.Billboards, Transit Ads,..). وسائل الإعلام الخارجية (مثل اللوحات الإعلانية والجدارية،..), Social Media (Facebook, Instagram, Snapchat, Tweeter,…). وسائل التواصل الاجتماعي, Internet (web pages, online databases,...). الإنترن…	No لا	Yes نعم	Yes نعم	Yes نعم	No لا	Yes نعم	Yes نعم	Yes نعم	Yes نعم	Yes نعم	Yes نعم	No لا	Yes نعم
Agree أوافق	Female أنثى	21	Saudi سعودي	Jeddah Unoversity, Jeddah. جامعة جدة، جدة	Medicine الطب	4th year السنة الرابعة	4-4.5	It is simulating human attitudes and abilities using computers and technology by teaching machines how humans think, behave, and react toward different situations. هو سلوك وخصائص معينة تتسم بها البرامج الحاسوبية، تجعلها تحاكي القدرات الذهنية البشرية وأنماط عملها.	Academic courses المناهج الدراسية, Print Media (books, magazines, newspapers). وسائل الإعلام المطبوعة (كتب، مجلات، صحف)., Broadcast Media (TV, Radio). وسائل الإعلام المرئية (تلفزيون ، راديو), Outdoor Media (e.g.Billboards, Transit Ads,..). وسائل الإعلام الخارجية (مثل اللوحات الإعلانية والجدارية،..), Social Media (Facebook, Instagram, Snapchat, Tweeter,…). وسائل التواصل الاجتماعي, Internet (web pa…	No لا	Yes نعم	Yes نعم	Yes نعم	Do not know لا أعلم	Yes نعم	Yes نعم	No لا	No لا	Do not know لا أعلم	Do not know لا أعلم	Do not know لا أعلم	Do not know لا أعلم
Agree أوافق	Female أنثى	20	Saudi سعودي	Batterjee Medical College, Jeddah. كلية البترجي الطبية، جدة	Respiratory Therapy العلاج التنفسي	2nd year السنة الثانية	4-4.5	It is simulating human attitudes and abilities using computers and technology by teaching machines how humans think, behave, and react toward different situations. هو سلوك وخصائص معينة تتسم بها البرامج الحاسوبية، تجعلها تحاكي القدرات الذهنية البشرية وأنماط عملها.	Broadcast Media (TV, Radio). وسائل الإعلام المرئية (تلفزيون ، راديو)	Yes- as a personal effort. نعم كرغبة شخصية	Yes نعم	Yes نعم	Yes نعم	Yes نعم	Yes نعم	Yes نعم	Yes نعم	Yes نعم	Yes نعم	Yes نعم	Yes نعم	Yes نعم
Agree أوافق	Female أنثى	21	Saudi سعودي	Jeddah Unoversity, Jeddah. جامعة جدة، جدة	Medicine الطب	4th year السنة الرابعة	>4.5	It is simulating human attitudes and abilities using computers and technology by teaching machines how humans think, behave, and react toward different situations. هو سلوك وخصائص معينة تتسم بها البرامج الحاسوبية، تجعلها تحاكي القدرات الذهنية البشرية وأنماط عملها.	Print Media (books, magazines, newspapers). وسائل الإعلام المطبوعة (كتب، مجلات، صحف)., Social Media (Facebook, Instagram, Snapchat, Tweeter,…). وسائل التواصل الاجتماعي, Internet (web pages, online databases,...). الإنترنت (صفحات الويب، قواعد البيانات، ...), Family members. أفراد الأسرة, Friends. أصدقاء	Yes- as a personal effort. نعم كرغبة شخصية	Yes نعم	Yes نعم	Yes نعم	No لا	Yes نعم	Yes نعم	Yes نعم	Yes نعم	Yes نعم	No لا	No لا	Yes نعم
Agree أوافق	Female أنثى	21	Saudi سعودي	Jeddah Unoversity, Jeddah. جامعة جدة، جدة	Medicine الطب	4th year السنة الرابعة	>4.5	It is simulating human attitudes and abilities using computers and technology by teaching machines how humans think, behave, and react toward different situations. هو سلوك وخصائص معينة تتسم بها البرامج الحاسوبية، تجعلها تحاكي القدرات الذهنية البشرية وأنماط عملها.	Print Media (books, magazines, newspapers). وسائل الإعلام المطبوعة (كتب، مجلات، صحف)., Friends. أصدقاء	No لا	Yes نعم	Yes نعم	Yes نعم	No لا	Yes نعم	Yes نعم	Yes نعم	Yes نعم	Do not know لا أعلم	Do not know لا أعلم	Do not know لا أعلم	Do not know لا أعلم
Agree أوافق	Female أنثى	18	Saudi سعودي	جامعة المجمعة	مختبرات طبية	1st year السنة الأولى	3.5-4	It is simulating human attitudes and abilities using computers and technology by teaching machines how humans think, behave, and react toward different situations. هو سلوك وخصائص معينة تتسم بها البرامج الحاسوبية، تجعلها تحاكي القدرات الذهنية البشرية وأنماط عملها.	Social Media (Facebook, Instagram, Snapchat, Tweeter,…). وسائل التواصل الاجتماعي, Internet (web pages, online databases,...). الإنترنت (صفحات الويب، قواعد البيانات، ...), Video games. ألعاب الفيديو, Family members. أفراد الأسرة	Yes- as a personal effort. نعم كرغبة شخصية	Yes نعم	Yes نعم	Yes نعم	Yes نعم	No لا	Do not know لا أعلم	No لا	No لا	Yes نعم	No لا	No لا	Yes نعم
Agree أوافق	Female أنثى	20	Saudi سعودي	جامعة المجمعه	مختبرات طبية medical laboratory science	1st year السنة الأولى	3.5-4	It is simulating human attitudes and abilities using computers and technology by teaching machines how humans think, behave, and react toward different situations. هو سلوك وخصائص معينة تتسم بها البرامج الحاسوبية، تجعلها تحاكي القدرات الذهنية البشرية وأنماط عملها.	Social Media (Facebook, Instagram, Snapchat, Tweeter,…). وسائل التواصل الاجتماعي, Internet (web pages, online databases,...). الإنترنت (صفحات الويب، قواعد البيانات، ...), Family members. أفراد الأسرة, Friends. أصدقاء	No لا	Yes نعم	Yes نعم	Do not know لا أعلم	Yes نعم	Yes نعم	Yes نعم	Yes نعم	Yes نعم	Yes نعم	No لا	Yes نعم	Do not know لا أعلم
Agree أوافق	Male ذكر	22	Saudi سعودي	Jeddah Unoversity, Jeddah. جامعة جدة، جدة	Medicine الطب	4th year السنة الرابعة	>4.5	It is simulating human attitudes and abilities using computers and technology by teaching machines how humans think, behave, and react toward different situations. هو سلوك وخصائص معينة تتسم بها البرامج الحاسوبية، تجعلها تحاكي القدرات الذهنية البشرية وأنماط عملها.	Print Media (books, magazines, newspapers). وسائل الإعلام المطبوعة (كتب، مجلات، صحف).	No لا	Yes نعم	Yes نعم	Do not know لا أعلم	No لا	Yes نعم	No لا	No لا	No لا	Do not know لا أعلم	Yes نعم	Yes نعم	Yes نعم
Agree أوافق	Female أنثى	19	Saudi سعودي	جامعة المجمعة	مختبرات طبية	1st year السنة الأولى	3.5-4	It is simulating human attitudes and abilities using computers and technology by teaching machines how humans think, behave, and react toward different situations. هو سلوك وخصائص معينة تتسم بها البرامج الحاسوبية، تجعلها تحاكي القدرات الذهنية البشرية وأنماط عملها.	Broadcast Media (TV, Radio). وسائل الإعلام المرئية (تلفزيون ، راديو), Social Media (Facebook, Instagram, Snapchat, Tweeter,…). وسائل التواصل الاجتماعي, Internet (web pages, online databases,...). الإنترنت (صفحات الويب، قواعد البيانات، ...), Video games. ألعاب الفيديو	No لا	Yes نعم	Yes نعم	Do not know لا أعلم	Yes نعم	Yes نعم	Yes نعم	Yes نعم	Yes نعم	Do not know لا أعلم	Do not know لا أعلم	Do not know لا أعلم	Yes نعم
Agree أوافق	Male ذكر	20	Saudi سعودي	المجمعة	Medicine الطب	1st year السنة الأولى	>4.5	It is simulating human attitudes and abilities using computers and technology by teaching machines how humans think, behave, and react toward different situations. هو سلوك وخصائص معينة تتسم بها البرامج الحاسوبية، تجعلها تحاكي القدرات الذهنية البشرية وأنماط عملها.	Academic courses المناهج الدراسية	No لا	Yes نعم	No لا	No لا	No لا	Yes نعم	Yes نعم	No لا	No لا	Yes نعم	Yes نعم	Yes نعم	No لا
Agree أوافق	Female أنثى	20	Saudi سعودي	جامعة المجمعة	المختبرات الطبية	1st year السنة الأولى	>4.5	It is simulating human attitudes and abilities using computers and technology by teaching machines how humans think, behave, and react toward different situations. هو سلوك وخصائص معينة تتسم بها البرامج الحاسوبية، تجعلها تحاكي القدرات الذهنية البشرية وأنماط عملها.	Social Media (Facebook, Instagram, Snapchat, Tweeter,…). وسائل التواصل الاجتماعي, Internet (web pages, online databases,...). الإنترنت (صفحات الويب، قواعد البيانات، ...), Friends. أصدقاء	No لا	Yes نعم	Yes نعم	Do not know لا أعلم	Do not know لا أعلم	Do not know لا أعلم	Yes نعم	No لا	Yes نعم	No لا	Yes نعم	No لا	No لا
Agree أوافق	Female أنثى	25	Saudi سعودي	Imam Mohammad Ibn Saud Islamic University, Riyadh. جامعة الإمام محمد بن سعود الإسلامية، الرياض.	Medicine الطب	intern إنترن	3.5-4	It is simulating human attitudes and abilities using computers and technology by teaching machines how humans think, behave, and react toward different situations. هو سلوك وخصائص معينة تتسم بها البرامج الحاسوبية، تجعلها تحاكي القدرات الذهنية البشرية وأنماط عملها.	Broadcast Media (TV, Radio). وسائل الإعلام المرئية (تلفزيون ، راديو), Social Media (Facebook, Instagram, Snapchat, Tweeter,…). وسائل التواصل الاجتماعي, Internet (web pages, online databases,...). الإنترنت (صفحات الويب، قواعد البيانات، ...)	Yes- as a personal effort. نعم كرغبة شخصية	Yes نعم	Yes نعم	Yes نعم	Yes نعم	Yes نعم	Yes نعم	Yes نعم	Yes نعم	Yes نعم	No لا	Yes نعم	Yes نعم
Agree أوافق	Male ذكر	21	Saudi سعودي	Jeddah Unoversity, Jeddah. جامعة جدة، جدة	Medicine الطب	4th year السنة الرابعة	4-4.5	It is simulating human attitudes and abilities using computers and technology by teaching machines how humans think, behave, and react toward different situations. هو سلوك وخصائص معينة تتسم بها البرامج الحاسوبية، تجعلها تحاكي القدرات الذهنية البشرية وأنماط عملها.	Academic courses المناهج الدراسية, Social Media (Facebook, Instagram, Snapchat, Tweeter,…). وسائل التواصل الاجتماعي, Internet (web pages, online databases,...). الإنترنت (صفحات الويب، قواعد البيانات، ...), Video games. ألعاب الفيديو, Family members. أفراد الأسرة, Friends. أصدقاء	No لا	Yes نعم	Yes نعم	Yes نعم	Yes نعم	No لا	Yes نعم	Yes نعم	Yes نعم	Yes نعم	Yes نعم	Yes نعم	Yes نعم
Agree أوافق	Female أنثى	21	Saudi سعودي	Batterjee Medical College, Jeddah. كلية البترجي الطبية، جدة	Medicine الطب	3rd year السنة الثالثة	≤3.5	It is simulating human attitudes and abilities using computers and technology by teaching machines how humans think, behave, and react toward different situations. هو سلوك وخصائص معينة تتسم بها البرامج الحاسوبية، تجعلها تحاكي القدرات الذهنية البشرية وأنماط عملها.	Academic courses المناهج الدراسية, Print Media (books, magazines, newspapers). وسائل الإعلام المطبوعة (كتب، مجلات، صحف)., Broadcast Media (TV, Radio). وسائل الإعلام المرئية (تلفزيون ، راديو), Outdoor Media (e.g.Billboards, Transit Ads,..). وسائل الإعلام الخارجية (مثل اللوحات الإعلانية والجدارية،..), Social Media (Facebook, Instagram, Snapchat, Tweeter,…). وسائل التواصل الاجتماعي, Internet (web pa…	No لا	Yes نعم	Yes نعم	Yes نعم	Yes نعم	Do not know لا أعلم	Yes نعم	Yes نعم	Yes نعم	Yes نعم	Yes نعم	Yes نعم	Yes نعم
Agree أوافق	Female أنثى	21	Saudi سعودي	جامعة المجمعة	مختبرات طبية	4th year السنة الرابعة	4-4.5	It is simulating human attitudes and abilities using computers and technology by teaching machines how humans think, behave, and react toward different situations. هو سلوك وخصائص معينة تتسم بها البرامج الحاسوبية، تجعلها تحاكي القدرات الذهنية البشرية وأنماط عملها.	Social Media (Facebook, Instagram, Snapchat, Tweeter,…). وسائل التواصل الاجتماعي, Internet (web pages, online databases,...). الإنترنت (صفحات الويب، قواعد البيانات، ...)	No لا	Yes نعم	Yes نعم	Yes نعم	No لا	Yes نعم	Yes نعم	No لا	Yes نعم	Yes نعم	Yes نعم	No لا	Yes نعم
Agree أوافق	Female أنثى	21	Saudi سعودي	Jeddah Unoversity, Jeddah. جامعة جدة، جدة	Medicine الطب	4th year السنة الرابعة	3.5-4	It is simulating human attitudes and abilities using computers and technology by teaching machines how humans think, behave, and react toward different situations. هو سلوك وخصائص معينة تتسم بها البرامج الحاسوبية، تجعلها تحاكي القدرات الذهنية البشرية وأنماط عملها.	Academic courses المناهج الدراسية, Social Media (Facebook, Instagram, Snapchat, Tweeter,…). وسائل التواصل الاجتماعي	No لا	Yes نعم	Do not know لا أعلم	Yes نعم	No لا	Yes نعم	Yes نعم	Yes نعم	Yes نعم	No لا	No لا	No لا	No لا
Agree أوافق	Male ذكر	21	Saudi سعودي	Jeddah Unoversity, Jeddah. جامعة جدة، جدة	Medicine الطب	4th year السنة الرابعة	>4.5	It is simulating human attitudes and abilities using computers and technology by teaching machines how humans think, behave, and react toward different situations. هو سلوك وخصائص معينة تتسم بها البرامج الحاسوبية، تجعلها تحاكي القدرات الذهنية البشرية وأنماط عملها.	Print Media (books, magazines, newspapers). وسائل الإعلام المطبوعة (كتب، مجلات، صحف)., Broadcast Media (TV, Radio). وسائل الإعلام المرئية (تلفزيون ، راديو), Social Media (Facebook, Instagram, Snapchat, Tweeter,…). وسائل التواصل الاجتماعي, Internet (web pages, online databases,...). الإنترنت (صفحات الويب، قواعد البيانات، ...), Family members. أفراد الأسرة	No لا	Yes نعم	Yes نعم	Yes نعم	Do not know لا أعلم	Yes نعم	Yes نعم	Do not know لا أعلم	Yes نعم	No لا	Do not know لا أعلم	Yes نعم	Yes نعم
Agree أوافق	Female أنثى	24	Saudi سعودي	جامعة حائل	Radiology الأشعة	خريجه	3.5-4	It is simulating human attitudes and abilities using computers and technology by teaching machines how humans think, behave, and react toward different situations. هو سلوك وخصائص معينة تتسم بها البرامج الحاسوبية، تجعلها تحاكي القدرات الذهنية البشرية وأنماط عملها.	Social Media (Facebook, Instagram, Snapchat, Tweeter,…). وسائل التواصل الاجتماعي, Internet (web pages, online databases,...). الإنترنت (صفحات الويب، قواعد البيانات، ...), Family members. أفراد الأسرة	No لا	Yes نعم	Yes نعم	Yes نعم	Do not know لا أعلم	Yes نعم	Yes نعم	Yes نعم	Yes نعم	No لا	Do not know لا أعلم	Do not know لا أعلم	Do not know لا أعلم
Agree أوافق	Female أنثى	23	Saudi سعودي	Jazan University, Jazan. جامعة جازان، جازان	Medicine الطب	السنة السادسة	>4.5	It is simulating human attitudes and abilities using computers and technology by teaching machines how humans think, behave, and react toward different situations. هو سلوك وخصائص معينة تتسم بها البرامج الحاسوبية، تجعلها تحاكي القدرات الذهنية البشرية وأنماط عملها.	Social Media (Facebook, Instagram, Snapchat, Tweeter,…). وسائل التواصل الاجتماعي, Family members. أفراد الأسرة, Friends. أصدقاء	No لا	Yes نعم	Yes نعم	Yes نعم	Yes نعم	Do not know لا أعلم	Yes نعم	Do not know لا أعلم	Yes نعم	Do not know لا أعلم	No لا	No لا	Yes نعم
Agree أوافق	Female أنثى	18	Saudi سعودي	جامعة حائل	Pharmacy الصيدلة	1st year السنة الأولى	4-4.5	It is simulating human attitudes and abilities using computers and technology by teaching machines how humans think, behave, and react toward different situations. هو سلوك وخصائص معينة تتسم بها البرامج الحاسوبية، تجعلها تحاكي القدرات الذهنية البشرية وأنماط عملها.	Social Media (Facebook, Instagram, Snapchat, Tweeter,…). وسائل التواصل الاجتماعي	No لا	Yes نعم	Yes نعم	Yes نعم	Do not know لا أعلم	Do not know لا أعلم	Yes نعم	No لا	No لا	Yes نعم	Do not know لا أعلم	Do not know لا أعلم	Do not know لا أعلم
Agree أوافق	Female أنثى	22	Saudi سعودي	جامعة حائل	Pharmacy الصيدلة	5th year السنة الخامسة	≤3.5	It is simulating human attitudes and abilities using computers and technology by teaching machines how humans think, behave, and react toward different situations. هو سلوك وخصائص معينة تتسم بها البرامج الحاسوبية، تجعلها تحاكي القدرات الذهنية البشرية وأنماط عملها.	Social Media (Facebook, Instagram, Snapchat, Tweeter,…). وسائل التواصل الاجتماعي, Internet (web pages, online databases,...). الإنترنت (صفحات الويب، قواعد البيانات، ...), Video games. ألعاب الفيديو, Friends. أصدقاء	No لا	Yes نعم	Yes نعم	Yes نعم	No لا	Do not know لا أعلم	Yes نعم	Do not know لا أعلم	Yes نعم	No لا	No لا	No لا	No لا
Agree أوافق	Female أنثى	22	Saudi سعودي	جامعة حائل	Pharmacy الصيدلة	5th year السنة الخامسة	3.5-4	It is simulating human attitudes and abilities using computers and technology by teaching machines how humans think, behave, and react toward different situations. هو سلوك وخصائص معينة تتسم بها البرامج الحاسوبية، تجعلها تحاكي القدرات الذهنية البشرية وأنماط عملها.	Print Media (books, magazines, newspapers). وسائل الإعلام المطبوعة (كتب، مجلات، صحف)., Social Media (Facebook, Instagram, Snapchat, Tweeter,…). وسائل التواصل الاجتماعي, Internet (web pages, online databases,...). الإنترنت (صفحات الويب، قواعد البيانات، ...), Video games. ألعاب الفيديو, Family members. أفراد الأسرة, Friends. أصدقاء	No لا	Yes نعم	Yes نعم	Yes نعم	Yes نعم	Yes نعم	Yes نعم	No لا	Yes نعم	Yes نعم	No لا	No لا	Yes نعم
Agree أوافق	Male ذكر	28	Saudi سعودي	Almareefa university	Medicine الطب	5th year السنة الخامسة	≤3.5	It is simulating human attitudes and abilities using computers and technology by teaching machines how humans think, behave, and react toward different situations. هو سلوك وخصائص معينة تتسم بها البرامج الحاسوبية، تجعلها تحاكي القدرات الذهنية البشرية وأنماط عملها.	Social Media (Facebook, Instagram, Snapchat, Tweeter,…). وسائل التواصل الاجتماعي	No لا	Yes نعم	Yes نعم	Yes نعم	No لا	Yes نعم	Yes نعم	Yes نعم	Yes نعم	No لا	Do not know لا أعلم	Do not know لا أعلم	Do not know لا أعلم
Agree أوافق	Female أنثى	25	Non-Saudi غير سعودي	كليات الريان	Medicine الطب	intern إنترن	>4.5	It is simulating human attitudes and abilities using computers and technology by teaching machines how humans think, behave, and react toward different situations. هو سلوك وخصائص معينة تتسم بها البرامج الحاسوبية، تجعلها تحاكي القدرات الذهنية البشرية وأنماط عملها.	Social Media (Facebook, Instagram, Snapchat, Tweeter,…). وسائل التواصل الاجتماعي, Internet (web pages, online databases,...). الإنترنت (صفحات الويب، قواعد البيانات، ...)	No لا	Yes نعم	No لا	Yes نعم	Yes نعم	Yes نعم	Yes نعم	No لا	Yes نعم	No لا	No لا	No لا	No لا
Agree أوافق	Male ذكر	34	Saudi سعودي	Tabuk University, Tabuk. جامعة تبوك، تبوك	الفيزياء الطبية	Postgraduate (e.g. MSc. or PhD) دراسات عليا (ماجستير أو دكتوراه)	>4.5	It is simulating human attitudes and abilities using computers and technology by teaching machines how humans think, behave, and react toward different situations. هو سلوك وخصائص معينة تتسم بها البرامج الحاسوبية، تجعلها تحاكي القدرات الذهنية البشرية وأنماط عملها.	Social Media (Facebook, Instagram, Snapchat, Tweeter,…). وسائل التواصل الاجتماعي, Internet (web pages, online databases,...). الإنترنت (صفحات الويب، قواعد البيانات، ...)	No لا	Yes نعم	Yes نعم	Yes نعم	Do not know لا أعلم	Do not know لا أعلم	Yes نعم	Yes نعم	Yes نعم	Yes نعم	Do not know لا أعلم	Yes نعم	Yes نعم
Agree أوافق	Female أنثى	20	Saudi سعودي	Taibah University, Madinah. جامعة طيبة، المدينة	Pharmacy الصيدلة	1st year السنة الأولى	4-4.5	It is simulating human attitudes and abilities using computers and technology by teaching machines how humans think, behave, and react toward different situations. هو سلوك وخصائص معينة تتسم بها البرامج الحاسوبية، تجعلها تحاكي القدرات الذهنية البشرية وأنماط عملها.	Academic courses المناهج الدراسية, Print Media (books, magazines, newspapers). وسائل الإعلام المطبوعة (كتب، مجلات، صحف)., Broadcast Media (TV, Radio). وسائل الإعلام المرئية (تلفزيون ، راديو), Outdoor Media (e.g.Billboards, Transit Ads,..). وسائل الإعلام الخارجية (مثل اللوحات الإعلانية والجدارية،..), Social Media (Facebook, Instagram, Snapchat, Tweeter,…). وسائل التواصل الاجتماعي, Internet (web pa…	No لا	Yes نعم	Do not know لا أعلم	No لا	Yes نعم	No لا	Do not know لا أعلم	Yes نعم	Yes نعم	No لا	Yes نعم	No لا	No لا
Agree أوافق	Male ذكر	19	Saudi سعودي	Taibah University, Madinah. جامعة طيبة، المدينة	Pharmacy الصيدلة	1st year السنة الأولى	4-4.5	It is simulating human attitudes and abilities using computers and technology by teaching machines how humans think, behave, and react toward different situations. هو سلوك وخصائص معينة تتسم بها البرامج الحاسوبية، تجعلها تحاكي القدرات الذهنية البشرية وأنماط عملها.	Broadcast Media (TV, Radio). وسائل الإعلام المرئية (تلفزيون ، راديو), Social Media (Facebook, Instagram, Snapchat, Tweeter,…). وسائل التواصل الاجتماعي, Internet (web pages, online databases,...). الإنترنت (صفحات الويب، قواعد البيانات، ...), Friends. أصدقاء	No لا	Yes نعم	Yes نعم	Yes نعم	Yes نعم	Yes نعم	Do not know لا أعلم	Do not know لا أعلم	Yes نعم	No لا	No لا	Yes نعم	Yes نعم
Agree أوافق	Female أنثى	20	Saudi سعودي	Taibah University, Madinah. جامعة طيبة، المدينة	Pharmacy الصيدلة	1st year السنة الأولى	4-4.5	It is simulating human attitudes and abilities using computers and technology by teaching machines how humans think, behave, and react toward different situations. هو سلوك وخصائص معينة تتسم بها البرامج الحاسوبية، تجعلها تحاكي القدرات الذهنية البشرية وأنماط عملها.	Broadcast Media (TV, Radio). وسائل الإعلام المرئية (تلفزيون ، راديو), Social Media (Facebook, Instagram, Snapchat, Tweeter,…). وسائل التواصل الاجتماعي, Internet (web pages, online databases,...). الإنترنت (صفحات الويب، قواعد البيانات، ...)	No لا	Yes نعم	Yes نعم	Yes نعم	Yes نعم	No لا	Yes نعم	Yes نعم	Yes نعم	No لا	Do not know لا أعلم	Do not know لا أعلم	Yes نعم
Agree أوافق	Female أنثى	22	Saudi سعودي	Taibah University, Madinah. جامعة طيبة، المدينة	Medicine الطب	4th year السنة الرابعة	>4.5	It is simulating human attitudes and abilities using computers and technology by teaching machines how humans think, behave, and react toward different situations. هو سلوك وخصائص معينة تتسم بها البرامج الحاسوبية، تجعلها تحاكي القدرات الذهنية البشرية وأنماط عملها.	Family members. أفراد الأسرة	No لا	No لا	No لا	No لا	Yes نعم	No لا	Yes نعم	No لا	No لا	No لا	No لا	No لا	No لا
Agree أوافق	Female أنثى	21	Saudi سعودي	Taibah University, Madinah. جامعة طيبة، المدينة	Medicine الطب	3rd year السنة الثالثة	>4.5	It is simulating human attitudes and abilities using computers and technology by teaching machines how humans think, behave, and react toward different situations. هو سلوك وخصائص معينة تتسم بها البرامج الحاسوبية، تجعلها تحاكي القدرات الذهنية البشرية وأنماط عملها.	Broadcast Media (TV, Radio). وسائل الإعلام المرئية (تلفزيون ، راديو), Social Media (Facebook, Instagram, Snapchat, Tweeter,…). وسائل التواصل الاجتماعي, Internet (web pages, online databases,...). الإنترنت (صفحات الويب، قواعد البيانات، ...), Family members. أفراد الأسرة	No لا	Yes نعم	Yes نعم	Do not know لا أعلم	Yes نعم	Yes نعم	Yes نعم	No لا	Yes نعم	No لا	Do not know لا أعلم	No لا	No لا
Agree أوافق	Female أنثى	22	Saudi سعودي	جامعة حائل	Nursing التمريض	RN	3.5-4	It is simulating human attitudes and abilities using computers and technology by teaching machines how humans think, behave, and react toward different situations. هو سلوك وخصائص معينة تتسم بها البرامج الحاسوبية، تجعلها تحاكي القدرات الذهنية البشرية وأنماط عملها.	Print Media (books, magazines, newspapers). وسائل الإعلام المطبوعة (كتب، مجلات، صحف)., Broadcast Media (TV, Radio). وسائل الإعلام المرئية (تلفزيون ، راديو), Outdoor Media (e.g.Billboards, Transit Ads,..). وسائل الإعلام الخارجية (مثل اللوحات الإعلانية والجدارية،..), Social Media (Facebook, Instagram, Snapchat, Tweeter,…). وسائل التواصل الاجتماعي	No لا	Yes نعم	Yes نعم	Yes نعم	Yes نعم	Yes نعم	Yes نعم	Yes نعم	Yes نعم	No لا	Do not know لا أعلم	Do not know لا أعلم	Yes نعم
Agree أوافق	Male ذكر	21	Saudi سعودي	Taibah University, Madinah. جامعة طيبة، المدينة	Medicine الطب	4th year السنة الرابعة	>4.5	It is simulating human attitudes and abilities using computers and technology by teaching machines how humans think, behave, and react toward different situations. هو سلوك وخصائص معينة تتسم بها البرامج الحاسوبية، تجعلها تحاكي القدرات الذهنية البشرية وأنماط عملها.	Broadcast Media (TV, Radio). وسائل الإعلام المرئية (تلفزيون ، راديو), Internet (web pages, online databases,...). الإنترنت (صفحات الويب، قواعد البيانات، ...)	No لا	Yes نعم	Yes نعم	Yes نعم	Yes نعم	Yes نعم	Yes نعم	No لا	Yes نعم	Yes نعم	Do not know لا أعلم	Do not know لا أعلم	Yes نعم
Agree أوافق	Male ذكر	22	Saudi سعودي	Taibah University, Madinah. جامعة طيبة، المدينة	Medicine الطب	3rd year السنة الثالثة	4-4.5	It is simulating human attitudes and abilities using computers and technology by teaching machines how humans think, behave, and react toward different situations. هو سلوك وخصائص معينة تتسم بها البرامج الحاسوبية، تجعلها تحاكي القدرات الذهنية البشرية وأنماط عملها.	Broadcast Media (TV, Radio). وسائل الإعلام المرئية (تلفزيون ، راديو), Social Media (Facebook, Instagram, Snapchat, Tweeter,…). وسائل التواصل الاجتماعي, Family members. أفراد الأسرة	No لا	Yes نعم	No لا	No لا	No لا	Yes نعم	No لا	No لا	No لا	Yes نعم	No لا	No لا	No لا
Agree أوافق	Female أنثى	19	Saudi سعودي	جامعة طيبة	Pharmacy الصيدلة	1st year السنة الأولى	>4.5	It is simulating human attitudes and abilities using computers and technology by teaching machines how humans think, behave, and react toward different situations. هو سلوك وخصائص معينة تتسم بها البرامج الحاسوبية، تجعلها تحاكي القدرات الذهنية البشرية وأنماط عملها.	Print Media (books, magazines, newspapers). وسائل الإعلام المطبوعة (كتب، مجلات، صحف)., Broadcast Media (TV, Radio). وسائل الإعلام المرئية (تلفزيون ، راديو), Outdoor Media (e.g.Billboards, Transit Ads,..). وسائل الإعلام الخارجية (مثل اللوحات الإعلانية والجدارية،..), Social Media (Facebook, Instagram, Snapchat, Tweeter,…). وسائل التواصل الاجتماعي, Internet (web pages, online databases,...). الإنترن…	No لا	Yes نعم	Yes نعم	Yes نعم	Yes نعم	Do not know لا أعلم	Yes نعم	No لا	No لا	No لا	Yes نعم	Do not know لا أعلم	No لا
Agree أوافق	Male ذكر	19	Saudi سعودي	Taibah University, Madinah. جامعة طيبة، المدينة	Pharmacy الصيدلة	1st year السنة الأولى	>4.5	It is simulating human attitudes and abilities using computers and technology by teaching machines how humans think, behave, and react toward different situations. هو سلوك وخصائص معينة تتسم بها البرامج الحاسوبية، تجعلها تحاكي القدرات الذهنية البشرية وأنماط عملها.	Internet (web pages, online databases,...). الإنترنت (صفحات الويب، قواعد البيانات، ...), Video games. ألعاب الفيديو	No لا	Do not know لا أعلم	Yes نعم	Do not know لا أعلم	Yes نعم	Do not know لا أعلم	Yes نعم	No لا	No لا	No لا	Yes نعم	Yes نعم	Yes نعم
Agree أوافق	Female أنثى	21	Saudi سعودي	King Khalid University, Abha. جامعة الملك خالد، أبها	Medicine الطب	4th year السنة الرابعة	>4.5	It is simulating human attitudes and abilities using computers and technology by teaching machines how humans think, behave, and react toward different situations. هو سلوك وخصائص معينة تتسم بها البرامج الحاسوبية، تجعلها تحاكي القدرات الذهنية البشرية وأنماط عملها.	Academic courses المناهج الدراسية, Family members. أفراد الأسرة	No لا	No لا	Do not know لا أعلم	Yes نعم	No لا	Yes نعم	No لا	No لا	No لا	Yes نعم	No لا	No لا	Yes نعم
Agree أوافق	Male ذكر	22	Saudi سعودي	Taibah University, Madinah. جامعة طيبة، المدينة	Medicine الطب	3rd year السنة الثالثة	4-4.5	It is simulating human attitudes and abilities using computers and technology by teaching machines how humans think, behave, and react toward different situations. هو سلوك وخصائص معينة تتسم بها البرامج الحاسوبية، تجعلها تحاكي القدرات الذهنية البشرية وأنماط عملها.	Academic courses المناهج الدراسية, Outdoor Media (e.g.Billboards, Transit Ads,..). وسائل الإعلام الخارجية (مثل اللوحات الإعلانية والجدارية،..), Social Media (Facebook, Instagram, Snapchat, Tweeter,…). وسائل التواصل الاجتماعي, Internet (web pages, online databases,...). الإنترنت (صفحات الويب، قواعد البيانات، ...), Video games. ألعاب الفيديو	No لا	Yes نعم	Yes نعم	Yes نعم	No لا	Do not know لا أعلم	Yes نعم	No لا	Yes نعم	No لا	No لا	No لا	No لا
Agree أوافق	Female أنثى	23	Saudi سعودي	جامعة المعرفة، الرياض	Medicine الطب	5th year السنة الخامسة	3.5-4	It is simulating human attitudes and abilities using computers and technology by teaching machines how humans think, behave, and react toward different situations. هو سلوك وخصائص معينة تتسم بها البرامج الحاسوبية، تجعلها تحاكي القدرات الذهنية البشرية وأنماط عملها.	Social Media (Facebook, Instagram, Snapchat, Tweeter,…). وسائل التواصل الاجتماعي, Internet (web pages, online databases,...). الإنترنت (صفحات الويب، قواعد البيانات، ...), Video games. ألعاب الفيديو, Family members. أفراد الأسرة	No لا	Yes نعم	Yes نعم	Yes نعم	No لا	Yes نعم	Yes نعم	Yes نعم	Yes نعم	No لا	No لا	No لا	No لا
Agree أوافق	Female أنثى	21	Saudi سعودي	حائل	Pharmacy الصيدلة	5th year السنة الخامسة	≤3.5	It is simulating human attitudes and abilities using computers and technology by teaching machines how humans think, behave, and react toward different situations. هو سلوك وخصائص معينة تتسم بها البرامج الحاسوبية، تجعلها تحاكي القدرات الذهنية البشرية وأنماط عملها.	Social Media (Facebook, Instagram, Snapchat, Tweeter,…). وسائل التواصل الاجتماعي	No لا	Yes نعم	Yes نعم	Yes نعم	Yes نعم	Yes نعم	Yes نعم	Yes نعم	Yes نعم	Yes نعم	No لا	No لا	Yes نعم
Agree أوافق	Female أنثى	20	Saudi سعودي	King Khalid University, Abha. جامعة الملك خالد، أبها	مختبرات طبية	4th year السنة الرابعة	>4.5	It is simulating human attitudes and abilities using computers and technology by teaching machines how humans think, behave, and react toward different situations. هو سلوك وخصائص معينة تتسم بها البرامج الحاسوبية، تجعلها تحاكي القدرات الذهنية البشرية وأنماط عملها.	Academic courses المناهج الدراسية, Social Media (Facebook, Instagram, Snapchat, Tweeter,…). وسائل التواصل الاجتماعي, Internet (web pages, online databases,...). الإنترنت (صفحات الويب، قواعد البيانات، ...)	No لا	Yes نعم	Yes نعم	Yes نعم	No لا	Do not know لا أعلم	Do not know لا أعلم	No لا	No لا	Yes نعم	No لا	Do not know لا أعلم	Yes نعم
Agree أوافق	Female أنثى	21	Saudi سعودي	King Khalid University, Abha. جامعة الملك خالد، أبها	الصحة العامة	2nd year السنة الثانية	4-4.5	It is simulating human attitudes and abilities using computers and technology by teaching machines how humans think, behave, and react toward different situations. هو سلوك وخصائص معينة تتسم بها البرامج الحاسوبية، تجعلها تحاكي القدرات الذهنية البشرية وأنماط عملها.	Print Media (books, magazines, newspapers). وسائل الإعلام المطبوعة (كتب، مجلات، صحف)., Social Media (Facebook, Instagram, Snapchat, Tweeter,…). وسائل التواصل الاجتماعي, Family members. أفراد الأسرة, Friends. أصدقاء	No لا	Yes نعم	Yes نعم	Do not know لا أعلم	Yes نعم	Yes نعم	Yes نعم	No لا	Yes نعم	No لا	Yes نعم	Yes نعم	No لا
Agree أوافق	Male ذكر	21	Saudi سعودي	King Khalid University, Abha. جامعة الملك خالد، أبها	Radiology الأشعة	2nd year السنة الثانية	4-4.5	It is simulating human attitudes and abilities using computers and technology by teaching machines how humans think, behave, and react toward different situations. هو سلوك وخصائص معينة تتسم بها البرامج الحاسوبية، تجعلها تحاكي القدرات الذهنية البشرية وأنماط عملها.	Social Media (Facebook, Instagram, Snapchat, Tweeter,…). وسائل التواصل الاجتماعي	No لا	Yes نعم	Yes نعم	Yes نعم	Yes نعم	Yes نعم	Yes نعم	Yes نعم	Yes نعم	Yes نعم	Yes نعم	Yes نعم	Yes نعم
Agree أوافق	Female أنثى	20	Saudi سعودي	King Khalid University, Abha. جامعة الملك خالد، أبها	مختبرات	2nd year السنة الثانية	3.5-4	It is simulating human attitudes and abilities using computers and technology by teaching machines how humans think, behave, and react toward different situations. هو سلوك وخصائص معينة تتسم بها البرامج الحاسوبية، تجعلها تحاكي القدرات الذهنية البشرية وأنماط عملها.	Academic courses المناهج الدراسية, Print Media (books, magazines, newspapers). وسائل الإعلام المطبوعة (كتب، مجلات، صحف)., Broadcast Media (TV, Radio). وسائل الإعلام المرئية (تلفزيون ، راديو), Outdoor Media (e.g.Billboards, Transit Ads,..). وسائل الإعلام الخارجية (مثل اللوحات الإعلانية والجدارية،..), Social Media (Facebook, Instagram, Snapchat, Tweeter,…). وسائل التواصل الاجتماعي, Internet (web pa…	Yes- as a personal effort. نعم كرغبة شخصية	Yes نعم	No لا	Do not know لا أعلم	Yes نعم	No لا	Yes نعم	Yes نعم	Yes نعم	No لا	Yes نعم	No لا	Yes نعم
Agree أوافق	Female أنثى	21	Saudi سعودي	Batterjee Medical College, Jeddah. كلية البترجي الطبية، جدة	Medicine الطب	3rd year السنة الثالثة	>4.5	It is simulating human attitudes and abilities using computers and technology by teaching machines how humans think, behave, and react toward different situations. هو سلوك وخصائص معينة تتسم بها البرامج الحاسوبية، تجعلها تحاكي القدرات الذهنية البشرية وأنماط عملها.	Academic courses المناهج الدراسية, Print Media (books, magazines, newspapers). وسائل الإعلام المطبوعة (كتب، مجلات، صحف)., Broadcast Media (TV, Radio). وسائل الإعلام المرئية (تلفزيون ، راديو), Outdoor Media (e.g.Billboards, Transit Ads,..). وسائل الإعلام الخارجية (مثل اللوحات الإعلانية والجدارية،..), Social Media (Facebook, Instagram, Snapchat, Tweeter,…). وسائل التواصل الاجتماعي, Internet (web pa…	Yes- as a personal effort. نعم كرغبة شخصية	Yes نعم	Yes نعم	Yes نعم	Yes نعم	Yes نعم	Yes نعم	Yes نعم	Yes نعم	Yes نعم	Do not know لا أعلم	Do not know لا أعلم	Do not know لا أعلم
Agree أوافق	Female أنثى	22	Saudi سعودي	King Abdulaziz University, Jeddah. جامعة الملك عبد العزيز، جدة	Medicine الطب	4th year السنة الرابعة	>4.5	It is simulating human attitudes and abilities using computers and technology by teaching machines how humans think, behave, and react toward different situations. هو سلوك وخصائص معينة تتسم بها البرامج الحاسوبية، تجعلها تحاكي القدرات الذهنية البشرية وأنماط عملها.	Academic courses المناهج الدراسية, Print Media (books, magazines, newspapers). وسائل الإعلام المطبوعة (كتب، مجلات، صحف)., Broadcast Media (TV, Radio). وسائل الإعلام المرئية (تلفزيون ، راديو), Outdoor Media (e.g.Billboards, Transit Ads,..). وسائل الإعلام الخارجية (مثل اللوحات الإعلانية والجدارية،..), Social Media (Facebook, Instagram, Snapchat, Tweeter,…). وسائل التواصل الاجتماعي, Internet (web pa…	Yes- as a personal effort. نعم كرغبة شخصية	Yes نعم	Yes نعم	Yes نعم	Yes نعم	Yes نعم	Yes نعم	Yes نعم	Yes نعم	Yes نعم	Do not know لا أعلم	Yes نعم	Yes نعم
Agree أوافق	Female أنثى	21	Saudi سعودي	Fakeeh College of Medical Sciences, Jeddah. كلية فقيه للعلوم الطبية، جدة.	Medicine الطب	3rd year السنة الثالثة	>4.5	It is simulating human attitudes and abilities using computers and technology by teaching machines how humans think, behave, and react toward different situations. هو سلوك وخصائص معينة تتسم بها البرامج الحاسوبية، تجعلها تحاكي القدرات الذهنية البشرية وأنماط عملها.	Print Media (books, magazines, newspapers). وسائل الإعلام المطبوعة (كتب، مجلات، صحف)., Outdoor Media (e.g.Billboards, Transit Ads,..). وسائل الإعلام الخارجية (مثل اللوحات الإعلانية والجدارية،..), Social Media (Facebook, Instagram, Snapchat, Tweeter,…). وسائل التواصل الاجتماعي, Internet (web pages, online databases,...). الإنترنت (صفحات الويب، قواعد البيانات، ...), Family members. أفراد الأسرة, Fr…	Yes- as a personal effort. نعم كرغبة شخصية	Yes نعم	Yes نعم	Yes نعم	Do not know لا أعلم	Yes نعم	Yes نعم	Do not know لا أعلم	Do not know لا أعلم	Yes نعم	Do not know لا أعلم	Yes نعم	Do not know لا أعلم
Agree أوافق	Female أنثى	25	Saudi سعودي	الامام عبدالرحمن بن فيصل	Medicine الطب	intern إنترن	4-4.5	It is simulating human attitudes and abilities using computers and technology by teaching machines how humans think, behave, and react toward different situations. هو سلوك وخصائص معينة تتسم بها البرامج الحاسوبية، تجعلها تحاكي القدرات الذهنية البشرية وأنماط عملها.	Print Media (books, magazines, newspapers). وسائل الإعلام المطبوعة (كتب، مجلات، صحف)., Social Media (Facebook, Instagram, Snapchat, Tweeter,…). وسائل التواصل الاجتماعي, Internet (web pages, online databases,...). الإنترنت (صفحات الويب، قواعد البيانات، ...)	No لا	Yes نعم	Yes نعم	Yes نعم	Yes نعم	Yes نعم	Yes نعم	No لا	Yes نعم	No لا	No لا	Yes نعم	Yes نعم
Agree أوافق	Female أنثى	20	Saudi سعودي	Taibah University, Madinah. جامعة طيبة، المدينة	Pharmacy الصيدلة	2nd year السنة الثانية	4-4.5	It is simulating human attitudes and abilities using computers and technology by teaching machines how humans think, behave, and react toward different situations. هو سلوك وخصائص معينة تتسم بها البرامج الحاسوبية، تجعلها تحاكي القدرات الذهنية البشرية وأنماط عملها.	Social Media (Facebook, Instagram, Snapchat, Tweeter,…). وسائل التواصل الاجتماعي, Internet (web pages, online databases,...). الإنترنت (صفحات الويب، قواعد البيانات، ...), Family members. أفراد الأسرة, Friends. أصدقاء	No لا	Yes نعم	Yes نعم	Yes نعم	Yes نعم	Yes نعم	Do not know لا أعلم	Do not know لا أعلم	Yes نعم	No لا	No لا	No لا	No لا
Agree أوافق	Male ذكر	22	Saudi سعودي	جامعة حائل	Medicine الطب	3rd year السنة الثالثة	3.5-4	It is simulating human attitudes and abilities using computers and technology by teaching machines how humans think, behave, and react toward different situations. هو سلوك وخصائص معينة تتسم بها البرامج الحاسوبية، تجعلها تحاكي القدرات الذهنية البشرية وأنماط عملها.	Broadcast Media (TV, Radio). وسائل الإعلام المرئية (تلفزيون ، راديو), Social Media (Facebook, Instagram, Snapchat, Tweeter,…). وسائل التواصل الاجتماعي, Internet (web pages, online databases,...). الإنترنت (صفحات الويب، قواعد البيانات، ...)	No لا	Yes نعم	Yes نعم	Yes نعم	Yes نعم	Yes نعم	No لا	Yes نعم	Yes نعم	No لا	Yes نعم	No لا	No لا
Agree أوافق	Male ذكر	22	Saudi سعودي	جامعة حائل	Medicine الطب	3rd year السنة الثالثة	3.5-4	It is simulating human attitudes and abilities using computers and technology by teaching machines how humans think, behave, and react toward different situations. هو سلوك وخصائص معينة تتسم بها البرامج الحاسوبية، تجعلها تحاكي القدرات الذهنية البشرية وأنماط عملها.	Broadcast Media (TV, Radio). وسائل الإعلام المرئية (تلفزيون ، راديو), Social Media (Facebook, Instagram, Snapchat, Tweeter,…). وسائل التواصل الاجتماعي	No لا	Yes نعم	Do not know لا أعلم	Do not know لا أعلم	Yes نعم	Yes نعم	Do not know لا أعلم	No لا	Yes نعم	No لا	Do not know لا أعلم	Do not know لا أعلم	Do not know لا أعلم
Agree أوافق	Female أنثى	22	Saudi سعودي	جامعة حائل	Medicine الطب	3rd year السنة الثالثة	>4.5	It is simulating human attitudes and abilities using computers and technology by teaching machines how humans think, behave, and react toward different situations. هو سلوك وخصائص معينة تتسم بها البرامج الحاسوبية، تجعلها تحاكي القدرات الذهنية البشرية وأنماط عملها.	Academic courses المناهج الدراسية, Broadcast Media (TV, Radio). وسائل الإعلام المرئية (تلفزيون ، راديو), Social Media (Facebook, Instagram, Snapchat, Tweeter,…). وسائل التواصل الاجتماعي, Friends. أصدقاء	No لا	Yes نعم	Yes نعم	Do not know لا أعلم	Yes نعم	No لا	Yes نعم	Do not know لا أعلم	Yes نعم	No لا	No لا	No لا	Do not know لا أعلم
Agree أوافق	Male ذكر	20	Saudi سعودي	جامعة حائل ،كلية الطب	Medicine الطب	1st year السنة الأولى	>4.5	It is simulating human attitudes and abilities using computers and technology by teaching machines how humans think, behave, and react toward different situations. هو سلوك وخصائص معينة تتسم بها البرامج الحاسوبية، تجعلها تحاكي القدرات الذهنية البشرية وأنماط عملها.	Broadcast Media (TV, Radio). وسائل الإعلام المرئية (تلفزيون ، راديو), Social Media (Facebook, Instagram, Snapchat, Tweeter,…). وسائل التواصل الاجتماعي, Internet (web pages, online databases,...). الإنترنت (صفحات الويب، قواعد البيانات، ...), Friends. أصدقاء	Yes- as a part of university curriculum. نعم كمنهج دراسي في الجامعة	Yes نعم	Yes نعم	Yes نعم	Yes نعم	Yes نعم	Yes نعم	Yes نعم	Yes نعم	Yes نعم	Yes نعم	Yes نعم	Yes نعم
Agree أوافق	Male ذكر	19	Saudi سعودي	جامعة حائل	Medicine الطب	1st year السنة الأولى	>4.5	It is simulating human attitudes and abilities using computers and technology by teaching machines how humans think, behave, and react toward different situations. هو سلوك وخصائص معينة تتسم بها البرامج الحاسوبية، تجعلها تحاكي القدرات الذهنية البشرية وأنماط عملها.	Social Media (Facebook, Instagram, Snapchat, Tweeter,…). وسائل التواصل الاجتماعي, Internet (web pages, online databases,...). الإنترنت (صفحات الويب، قواعد البيانات، ...), Video games. ألعاب الفيديو, Friends. أصدقاء	No لا	Yes نعم	Yes نعم	No لا	Yes نعم	Do not know لا أعلم	Yes نعم	No لا	Yes نعم	Yes نعم	No لا	No لا	No لا
Agree أوافق	Male ذكر	19	Saudi سعودي	جامعة حائل	Medicine الطب	1st year السنة الأولى	>4.5	It is simulating human attitudes and abilities using computers and technology by teaching machines how humans think, behave, and react toward different situations. هو سلوك وخصائص معينة تتسم بها البرامج الحاسوبية، تجعلها تحاكي القدرات الذهنية البشرية وأنماط عملها.	Print Media (books, magazines, newspapers). وسائل الإعلام المطبوعة (كتب، مجلات، صحف)., Broadcast Media (TV, Radio). وسائل الإعلام المرئية (تلفزيون ، راديو), Outdoor Media (e.g.Billboards, Transit Ads,..). وسائل الإعلام الخارجية (مثل اللوحات الإعلانية والجدارية،..), Social Media (Facebook, Instagram, Snapchat, Tweeter,…). وسائل التواصل الاجتماعي, Internet (web pages, online databases,...). الإنترن…	No لا	Yes نعم	Yes نعم	Yes نعم	Yes نعم	Yes نعم	Yes نعم	Yes نعم	Yes نعم	Yes نعم	Yes نعم	Yes نعم	Yes نعم
Agree أوافق	Female أنثى	19	Saudi سعودي	جامعة حائل	Medicine الطب	1st year السنة الأولى	≤3.5	It is simulating human attitudes and abilities using computers and technology by teaching machines how humans think, behave, and react toward different situations. هو سلوك وخصائص معينة تتسم بها البرامج الحاسوبية، تجعلها تحاكي القدرات الذهنية البشرية وأنماط عملها.	Social Media (Facebook, Instagram, Snapchat, Tweeter,…). وسائل التواصل الاجتماعي, Internet (web pages, online databases,...). الإنترنت (صفحات الويب، قواعد البيانات، ...)	No لا	Yes نعم	Yes نعم	No لا	No لا	Yes نعم	Yes نعم	No لا	Yes نعم	No لا	No لا	No لا	No لا
Agree أوافق	Female أنثى	18	Saudi سعودي	جامعة حائل	Medicine الطب	1st year السنة الأولى	>4.5	It is simulating human attitudes and abilities using computers and technology by teaching machines how humans think, behave, and react toward different situations. هو سلوك وخصائص معينة تتسم بها البرامج الحاسوبية، تجعلها تحاكي القدرات الذهنية البشرية وأنماط عملها.	Academic courses المناهج الدراسية, Social Media (Facebook, Instagram, Snapchat, Tweeter,…). وسائل التواصل الاجتماعي, Internet (web pages, online databases,...). الإنترنت (صفحات الويب، قواعد البيانات، ...), Video games. ألعاب الفيديو, Friends. أصدقاء	Yes- as a personal effort. نعم كرغبة شخصية	Yes نعم	Yes نعم	Yes نعم	Do not know لا أعلم	Yes نعم	Yes نعم	No لا	Yes نعم	Do not know لا أعلم	Yes نعم	Yes نعم	Yes نعم
Agree أوافق	Female أنثى	26	Saudi سعودي	King Saud University, Riyadh. جامعة الملك سعود، الرياض	Medicine الطب	2nd year السنة الثانية	≤3.5	It is simulating human attitudes and abilities using computers and technology by teaching machines how humans think, behave, and react toward different situations. هو سلوك وخصائص معينة تتسم بها البرامج الحاسوبية، تجعلها تحاكي القدرات الذهنية البشرية وأنماط عملها.	Social Media (Facebook, Instagram, Snapchat, Tweeter,…). وسائل التواصل الاجتماعي, Internet (web pages, online databases,...). الإنترنت (صفحات الويب، قواعد البيانات، ...)	No لا	Yes نعم	Yes نعم	Yes نعم	Yes نعم	Yes نعم	No لا	No لا	Yes نعم	No لا	Do not know لا أعلم	Do not know لا أعلم	Do not know لا أعلم
Agree أوافق	Female أنثى	20	Non-Saudi غير سعودي	Batterjee Medical College, Jeddah. كلية البترجي الطبية، جدة	Pharmacy الصيدلة	2nd year السنة الثانية	>4.5	It is simulating human attitudes and abilities using computers and technology by teaching machines how humans think, behave, and react toward different situations. هو سلوك وخصائص معينة تتسم بها البرامج الحاسوبية، تجعلها تحاكي القدرات الذهنية البشرية وأنماط عملها.	Broadcast Media (TV, Radio). وسائل الإعلام المرئية (تلفزيون ، راديو), Outdoor Media (e.g.Billboards, Transit Ads,..). وسائل الإعلام الخارجية (مثل اللوحات الإعلانية والجدارية،..), Social Media (Facebook, Instagram, Snapchat, Tweeter,…). وسائل التواصل الاجتماعي, Family members. أفراد الأسرة, Friends. أصدقاء	Yes- as a personal effort. نعم كرغبة شخصية	Yes نعم	Yes نعم	Yes نعم	No لا	Do not know لا أعلم	Yes نعم	No لا	Yes نعم	No لا	Do not know لا أعلم	Do not know لا أعلم	Do not know لا أعلم
Agree أوافق	Female أنثى	20	Saudi سعودي	King Abdulaziz University, Jeddah. جامعة الملك عبد العزيز، جدة	تغذية علاجية	2nd year السنة الثانية	4-4.5	It is simulating human attitudes and abilities using computers and technology by teaching machines how humans think, behave, and react toward different situations. هو سلوك وخصائص معينة تتسم بها البرامج الحاسوبية، تجعلها تحاكي القدرات الذهنية البشرية وأنماط عملها.	Academic courses المناهج الدراسية	No لا	Yes نعم	Yes نعم	Yes نعم	Yes نعم	Yes نعم	Yes نعم	Yes نعم	Yes نعم	No لا	Yes نعم	Do not know لا أعلم	Do not know لا أعلم
Agree أوافق	Female أنثى	21	Saudi سعودي	King Abdulaziz University, Jeddah. جامعة الملك عبد العزيز، جدة	تغذية علاجية Clinical Nutrition	1st year السنة الأولى	4-4.5	It is simulating human attitudes and abilities using computers and technology by teaching machines how humans think, behave, and react toward different situations. هو سلوك وخصائص معينة تتسم بها البرامج الحاسوبية، تجعلها تحاكي القدرات الذهنية البشرية وأنماط عملها.	Academic courses المناهج الدراسية, Print Media (books, magazines, newspapers). وسائل الإعلام المطبوعة (كتب، مجلات، صحف)., Broadcast Media (TV, Radio). وسائل الإعلام المرئية (تلفزيون ، راديو), Social Media (Facebook, Instagram, Snapchat, Tweeter,…). وسائل التواصل الاجتماعي, Internet (web pages, online databases,...). الإنترنت (صفحات الويب، قواعد البيانات، ...), Video games. ألعاب الفيديو, Family m…	No لا	Yes نعم	Yes نعم	Yes نعم	Yes نعم	Yes نعم	Yes نعم	Yes نعم	Yes نعم	No لا	No لا	No لا	No لا
Agree أوافق	Male ذكر	22	Saudi سعودي	الامام عبدالرحمن بن فيصل	Medicine الطب	3rd year السنة الثالثة	4-4.5	It is simulating human attitudes and abilities using computers and technology by teaching machines how humans think, behave, and react toward different situations. هو سلوك وخصائص معينة تتسم بها البرامج الحاسوبية، تجعلها تحاكي القدرات الذهنية البشرية وأنماط عملها.	Broadcast Media (TV, Radio). وسائل الإعلام المرئية (تلفزيون ، راديو), Social Media (Facebook, Instagram, Snapchat, Tweeter,…). وسائل التواصل الاجتماعي	No لا	Yes نعم	Yes نعم	Yes نعم	Yes نعم	Yes نعم	Yes نعم	Yes نعم	Yes نعم	No لا	No لا	No لا	No لا
Agree أوافق	Female أنثى	20	Saudi سعودي	King Abdulaziz University, Jeddah. جامعة الملك عبد العزيز، جدة	Medical laboratory	2nd year السنة الثانية	4-4.5	It is simulating human attitudes and abilities using computers and technology by teaching machines how humans think, behave, and react toward different situations. هو سلوك وخصائص معينة تتسم بها البرامج الحاسوبية، تجعلها تحاكي القدرات الذهنية البشرية وأنماط عملها.	Social Media (Facebook, Instagram, Snapchat, Tweeter,…). وسائل التواصل الاجتماعي	No لا	Do not know لا أعلم	Yes نعم	Yes نعم	No لا	Yes نعم	Do not know لا أعلم	No لا	No لا	No لا	Yes نعم	Do not know لا أعلم	Do not know لا أعلم
Agree أوافق	Female أنثى	36	Saudi سعودي	King Abdulaziz University, Jeddah. جامعة الملك عبد العزيز، جدة	تعقيم الطبي	دبلوم	>4.5	It is simulating human attitudes and abilities using computers and technology by teaching machines how humans think, behave, and react toward different situations. هو سلوك وخصائص معينة تتسم بها البرامج الحاسوبية، تجعلها تحاكي القدرات الذهنية البشرية وأنماط عملها.	Internet (web pages, online databases,...). الإنترنت (صفحات الويب، قواعد البيانات، ...)	No لا	Yes نعم	Yes نعم	Yes نعم	No لا	Yes نعم	Yes نعم	No لا	Yes نعم	Yes نعم	No لا	Yes نعم	Yes نعم
Agree أوافق	Female أنثى	18	Saudi سعودي	Umm Al Qura University, Makkah. جامعة أم القرى، مكة	Preparatory Year السنة التحضيرية	Preparatory Year السنة التحضيرية	3.5-4	It is simulating human attitudes and abilities using computers and technology by teaching machines how humans think, behave, and react toward different situations. هو سلوك وخصائص معينة تتسم بها البرامج الحاسوبية، تجعلها تحاكي القدرات الذهنية البشرية وأنماط عملها.	Print Media (books, magazines, newspapers). وسائل الإعلام المطبوعة (كتب، مجلات، صحف)., Broadcast Media (TV, Radio). وسائل الإعلام المرئية (تلفزيون ، راديو), Social Media (Facebook, Instagram, Snapchat, Tweeter,…). وسائل التواصل الاجتماعي, Family members. أفراد الأسرة	No لا	Yes نعم	Yes نعم	Yes نعم	Do not know لا أعلم	Yes نعم	Yes نعم	Yes نعم	Yes نعم	No لا	Yes نعم	Yes نعم	No لا
Agree أوافق	Male ذكر	18	Saudi سعودي	Umm Al Qura University, Makkah. جامعة أم القرى، مكة	Preparatory Year السنة التحضيرية	Preparatory Year السنة التحضيرية	4-4.5	It is simulating human attitudes and abilities using computers and technology by teaching machines how humans think, behave, and react toward different situations. هو سلوك وخصائص معينة تتسم بها البرامج الحاسوبية، تجعلها تحاكي القدرات الذهنية البشرية وأنماط عملها.	Print Media (books, magazines, newspapers). وسائل الإعلام المطبوعة (كتب، مجلات، صحف)., Social Media (Facebook, Instagram, Snapchat, Tweeter,…). وسائل التواصل الاجتماعي, Internet (web pages, online databases,...). الإنترنت (صفحات الويب، قواعد البيانات، ...), Video games. ألعاب الفيديو	No لا	Yes نعم	Yes نعم	Do not know لا أعلم	No لا	Yes نعم	Do not know لا أعلم	No لا	Yes نعم	No لا	No لا	No لا	Yes نعم
Agree أوافق	Male ذكر	18	Saudi سعودي	Umm Al Qura University, Makkah. جامعة أم القرى، مكة	Preparatory Year السنة التحضيرية	Preparatory Year السنة التحضيرية	≤3.5	It is simulating human attitudes and abilities using computers and technology by teaching machines how humans think, behave, and react toward different situations. هو سلوك وخصائص معينة تتسم بها البرامج الحاسوبية، تجعلها تحاكي القدرات الذهنية البشرية وأنماط عملها.	Social Media (Facebook, Instagram, Snapchat, Tweeter,…). وسائل التواصل الاجتماعي, Video games. ألعاب الفيديو, Friends. أصدقاء	Yes- as a personal effort. نعم كرغبة شخصية	Yes نعم	Yes نعم	No لا	Yes نعم	Yes نعم	Yes نعم	No لا	Yes نعم	Yes نعم	Yes نعم	Yes نعم	Yes نعم
Agree أوافق	Male ذكر	20	Saudi سعودي	Umm Al Qura University, Makkah. جامعة أم القرى، مكة	Medicine الطب	3rd year السنة الثالثة	>4.5	It is simulating human attitudes and abilities using computers and technology by teaching machines how humans think, behave, and react toward different situations. هو سلوك وخصائص معينة تتسم بها البرامج الحاسوبية، تجعلها تحاكي القدرات الذهنية البشرية وأنماط عملها.	Academic courses المناهج الدراسية, Social Media (Facebook, Instagram, Snapchat, Tweeter,…). وسائل التواصل الاجتماعي, Internet (web pages, online databases,...). الإنترنت (صفحات الويب، قواعد البيانات، ...), Family members. أفراد الأسرة, Friends. أصدقاء	No لا	Yes نعم	Yes نعم	Yes نعم	Yes نعم	Yes نعم	Yes نعم	Yes نعم	Yes نعم	Yes نعم	Yes نعم	Yes نعم	Yes نعم
Agree أوافق	Female أنثى	18	Saudi سعودي	Umm Al Qura University, Makkah. جامعة أم القرى، مكة	Preparatory Year السنة التحضيرية	Preparatory Year السنة التحضيرية	3.5-4	It is simulating human attitudes and abilities using computers and technology by teaching machines how humans think, behave, and react toward different situations. هو سلوك وخصائص معينة تتسم بها البرامج الحاسوبية، تجعلها تحاكي القدرات الذهنية البشرية وأنماط عملها.	Academic courses المناهج الدراسية, Broadcast Media (TV, Radio). وسائل الإعلام المرئية (تلفزيون ، راديو), Social Media (Facebook, Instagram, Snapchat, Tweeter,…). وسائل التواصل الاجتماعي, Internet (web pages, online databases,...). الإنترنت (صفحات الويب، قواعد البيانات، ...), Video games. ألعاب الفيديو	No لا	Yes نعم	Yes نعم	Yes نعم	Do not know لا أعلم	Yes نعم	Yes نعم	Do not know لا أعلم	Do not know لا أعلم	Yes نعم	Yes نعم	Yes نعم	Yes نعم
Agree أوافق	Female أنثى	21	Saudi سعودي	King Abdulaziz University, Jeddah. جامعة الملك عبد العزيز، جدة	التغذية الاكلينيكية	3rd year السنة الثالثة	>4.5	It is simulating human attitudes and abilities using computers and technology by teaching machines how humans think, behave, and react toward different situations. هو سلوك وخصائص معينة تتسم بها البرامج الحاسوبية، تجعلها تحاكي القدرات الذهنية البشرية وأنماط عملها.	Academic courses المناهج الدراسية, Broadcast Media (TV, Radio). وسائل الإعلام المرئية (تلفزيون ، راديو), Social Media (Facebook, Instagram, Snapchat, Tweeter,…). وسائل التواصل الاجتماعي, Internet (web pages, online databases,...). الإنترنت (صفحات الويب، قواعد البيانات، ...), Family members. أفراد الأسرة, Friends. أصدقاء	Yes- as a personal effort. نعم كرغبة شخصية	Yes نعم	Yes نعم	Yes نعم	Yes نعم	Yes نعم	Yes نعم	Yes نعم	Yes نعم	Do not know لا أعلم	Yes نعم	No لا	Yes نعم
Agree أوافق	Female أنثى	39	Non-Saudi غير سعودي	خارح المملكه	Pharmacy الصيدلة	Postgraduate (e.g. MSc. or PhD) دراسات عليا (ماجستير أو دكتوراه)	4-4.5	It is simulating human attitudes and abilities using computers and technology by teaching machines how humans think, behave, and react toward different situations. هو سلوك وخصائص معينة تتسم بها البرامج الحاسوبية، تجعلها تحاكي القدرات الذهنية البشرية وأنماط عملها.	Broadcast Media (TV, Radio). وسائل الإعلام المرئية (تلفزيون ، راديو), Social Media (Facebook, Instagram, Snapchat, Tweeter,…). وسائل التواصل الاجتماعي, Internet (web pages, online databases,...). الإنترنت (صفحات الويب، قواعد البيانات، ...)	No لا	Yes نعم	Yes نعم	Yes نعم	Yes نعم	Do not know لا أعلم	No لا	Yes نعم	Yes نعم	Yes نعم	No لا	No لا	Do not know لا أعلم
Agree أوافق	Female أنثى	23	Saudi سعودي	Ksau, com, jeddah	Medicine الطب	السنه السادسه	>4.5	It is simulating human attitudes and abilities using computers and technology by teaching machines how humans think, behave, and react toward different situations. هو سلوك وخصائص معينة تتسم بها البرامج الحاسوبية، تجعلها تحاكي القدرات الذهنية البشرية وأنماط عملها.	Academic courses المناهج الدراسية, Print Media (books, magazines, newspapers). وسائل الإعلام المطبوعة (كتب، مجلات، صحف)., Broadcast Media (TV, Radio). وسائل الإعلام المرئية (تلفزيون ، راديو), Outdoor Media (e.g.Billboards, Transit Ads,..). وسائل الإعلام الخارجية (مثل اللوحات الإعلانية والجدارية،..), Social Media (Facebook, Instagram, Snapchat, Tweeter,…). وسائل التواصل الاجتماعي, Internet (web pa…	No لا	Yes نعم	Yes نعم	Yes نعم	Yes نعم	Yes نعم	Yes نعم	Yes نعم	Yes نعم	Yes نعم	Yes نعم	Yes نعم	Do not know لا أعلم
Agree أوافق	Female أنثى	18	Saudi سعودي	Umm Al Qura University, Makkah. جامعة أم القرى، مكة	Preparatory Year السنة التحضيرية	Preparatory Year السنة التحضيرية	4-4.5	It is simulating human attitudes and abilities using computers and technology by teaching machines how humans think, behave, and react toward different situations. هو سلوك وخصائص معينة تتسم بها البرامج الحاسوبية، تجعلها تحاكي القدرات الذهنية البشرية وأنماط عملها.	Academic courses المناهج الدراسية, Social Media (Facebook, Instagram, Snapchat, Tweeter,…). وسائل التواصل الاجتماعي, Internet (web pages, online databases,...). الإنترنت (صفحات الويب، قواعد البيانات، ...)	Yes- as a personal effort. نعم كرغبة شخصية	Do not know لا أعلم	Yes نعم	Yes نعم	Yes نعم	Yes نعم	Yes نعم	Do not know لا أعلم	Yes نعم	Do not know لا أعلم	No لا	No لا	No لا
Agree أوافق	Female أنثى	19	Saudi سعودي	Umm Al Qura University, Makkah. جامعة أم القرى، مكة	Preparatory Year السنة التحضيرية	Preparatory Year السنة التحضيرية	>4.5	It is simulating human attitudes and abilities using computers and technology by teaching machines how humans think, behave, and react toward different situations. هو سلوك وخصائص معينة تتسم بها البرامج الحاسوبية، تجعلها تحاكي القدرات الذهنية البشرية وأنماط عملها.	Broadcast Media (TV, Radio). وسائل الإعلام المرئية (تلفزيون ، راديو), Social Media (Facebook, Instagram, Snapchat, Tweeter,…). وسائل التواصل الاجتماعي, Internet (web pages, online databases,...). الإنترنت (صفحات الويب، قواعد البيانات، ...), Family members. أفراد الأسرة	No لا	Yes نعم	Yes نعم	Yes نعم	Do not know لا أعلم	Yes نعم	Yes نعم	No لا	Yes نعم	No لا	No لا	No لا	Do not know لا أعلم
Agree أوافق	Female أنثى	19	Saudi سعودي	Umm Al Qura University, Makkah. جامعة أم القرى، مكة	Nursing التمريض	Preparatory Year السنة التحضيرية	4-4.5	It is simulating human attitudes and abilities using computers and technology by teaching machines how humans think, behave, and react toward different situations. هو سلوك وخصائص معينة تتسم بها البرامج الحاسوبية، تجعلها تحاكي القدرات الذهنية البشرية وأنماط عملها.	Academic courses المناهج الدراسية, Social Media (Facebook, Instagram, Snapchat, Tweeter,…). وسائل التواصل الاجتماعي, Internet (web pages, online databases,...). الإنترنت (صفحات الويب، قواعد البيانات، ...), Video games. ألعاب الفيديو	No لا	Yes نعم	No لا	Yes نعم	Yes نعم	Do not know لا أعلم	Yes نعم	No لا	No لا	No لا	No لا	Yes نعم	No لا
Agree أوافق	Female أنثى	19	Saudi سعودي	Umm Al Qura University, Makkah. جامعة أم القرى، مكة	Nursing التمريض	Preparatory Year السنة التحضيرية	4-4.5	It is simulating human attitudes and abilities using computers and technology by teaching machines how humans think, behave, and react toward different situations. هو سلوك وخصائص معينة تتسم بها البرامج الحاسوبية، تجعلها تحاكي القدرات الذهنية البشرية وأنماط عملها.	Academic courses المناهج الدراسية, Broadcast Media (TV, Radio). وسائل الإعلام المرئية (تلفزيون ، راديو), Social Media (Facebook, Instagram, Snapchat, Tweeter,…). وسائل التواصل الاجتماعي, Internet (web pages, online databases,...). الإنترنت (صفحات الويب، قواعد البيانات، ...), Video games. ألعاب الفيديو, Friends. أصدقاء	No لا	Yes نعم	Yes نعم	Yes نعم	Yes نعم	Yes نعم	Yes نعم	No لا	Yes نعم	Yes نعم	Yes نعم	Yes نعم	Yes نعم
Agree أوافق	Female أنثى	19	Saudi سعودي	King Abdulaziz University, Jeddah. جامعة الملك عبد العزيز، جدة	Medicine الطب	1st year السنة الأولى	>4.5	It is simulating human attitudes and abilities using computers and technology by teaching machines how humans think, behave, and react toward different situations. هو سلوك وخصائص معينة تتسم بها البرامج الحاسوبية، تجعلها تحاكي القدرات الذهنية البشرية وأنماط عملها.	Social Media (Facebook, Instagram, Snapchat, Tweeter,…). وسائل التواصل الاجتماعي, Internet (web pages, online databases,...). الإنترنت (صفحات الويب، قواعد البيانات، ...), Video games. ألعاب الفيديو, Family members. أفراد الأسرة	No لا	Yes نعم	Yes نعم	Yes نعم	Yes نعم	Do not know لا أعلم	Yes نعم	Yes نعم	Yes نعم	No لا	No لا	Yes نعم	Yes نعم
Agree أوافق	Female أنثى	24	Saudi سعودي	King Abdulaziz University, Jeddah. جامعة الملك عبد العزيز، جدة	Clinical Nutrition	Postgraduate (e.g. MSc. or PhD) دراسات عليا (ماجستير أو دكتوراه)	>4.5	It is simulating human attitudes and abilities using computers and technology by teaching machines how humans think, behave, and react toward different situations. هو سلوك وخصائص معينة تتسم بها البرامج الحاسوبية، تجعلها تحاكي القدرات الذهنية البشرية وأنماط عملها.	Social Media (Facebook, Instagram, Snapchat, Tweeter,…). وسائل التواصل الاجتماعي, Family members. أفراد الأسرة, Friends. أصدقاء	Yes- as a personal effort. نعم كرغبة شخصية	Yes نعم	Yes نعم	Yes نعم	Yes نعم	Yes نعم	Yes نعم	Yes نعم	Yes نعم	No لا	No لا	No لا	No لا
Agree أوافق	Female أنثى	31	Saudi سعودي	Jedmed	Dentistry طب الأسنان	Postgraduate (e.g. MSc. or PhD) دراسات عليا (ماجستير أو دكتوراه)	4-4.5	It is simulating human attitudes and abilities using computers and technology by teaching machines how humans think, behave, and react toward different situations. هو سلوك وخصائص معينة تتسم بها البرامج الحاسوبية، تجعلها تحاكي القدرات الذهنية البشرية وأنماط عملها.	Social Media (Facebook, Instagram, Snapchat, Tweeter,…). وسائل التواصل الاجتماعي, Internet (web pages, online databases,...). الإنترنت (صفحات الويب، قواعد البيانات، ...)	No لا	Yes نعم	Do not know لا أعلم	Yes نعم	Yes نعم	Yes نعم	Yes نعم	Do not know لا أعلم	Do not know لا أعلم	No لا	Do not know لا أعلم	Do not know لا أعلم	Yes نعم
Agree أوافق	Male ذكر	18	Saudi سعودي	Umm Al Qura University, Makkah. جامعة أم القرى، مكة	Preparatory Year السنة التحضيرية	Preparatory Year السنة التحضيرية	>4.5	It is simulating human attitudes and abilities using computers and technology by teaching machines how humans think, behave, and react toward different situations. هو سلوك وخصائص معينة تتسم بها البرامج الحاسوبية، تجعلها تحاكي القدرات الذهنية البشرية وأنماط عملها.	Print Media (books, magazines, newspapers). وسائل الإعلام المطبوعة (كتب، مجلات، صحف)., Broadcast Media (TV, Radio). وسائل الإعلام المرئية (تلفزيون ، راديو), Outdoor Media (e.g.Billboards, Transit Ads,..). وسائل الإعلام الخارجية (مثل اللوحات الإعلانية والجدارية،..), Social Media (Facebook, Instagram, Snapchat, Tweeter,…). وسائل التواصل الاجتماعي, Internet (web pages, online databases,...). الإنترن…	Yes- as a part of university curriculum. نعم كمنهج دراسي في الجامعة	Yes نعم	Yes نعم	Yes نعم	Do not know لا أعلم	Yes نعم	Yes نعم	Yes نعم	Yes نعم	No لا	No لا	Yes نعم	Yes نعم
Agree أوافق	Male ذكر	18	Saudi سعودي	Umm Al Qura University, Makkah. جامعة أم القرى، مكة	Preparatory Year السنة التحضيرية	Preparatory Year السنة التحضيرية	≤3.5	It is simulating human attitudes and abilities using computers and technology by teaching machines how humans think, behave, and react toward different situations. هو سلوك وخصائص معينة تتسم بها البرامج الحاسوبية، تجعلها تحاكي القدرات الذهنية البشرية وأنماط عملها.	Academic courses المناهج الدراسية, Print Media (books, magazines, newspapers). وسائل الإعلام المطبوعة (كتب، مجلات، صحف)., Broadcast Media (TV, Radio). وسائل الإعلام المرئية (تلفزيون ، راديو), Social Media (Facebook, Instagram, Snapchat, Tweeter,…). وسائل التواصل الاجتماعي, Internet (web pages, online databases,...). الإنترنت (صفحات الويب، قواعد البيانات، ...), Video games. ألعاب الفيديو, Family m…	No لا	Yes نعم	Yes نعم	Yes نعم	Yes نعم	Yes نعم	Yes نعم	Yes نعم	Yes نعم	No لا	Yes نعم	Yes نعم	Yes نعم
Agree أوافق	Female أنثى	22	Non-Saudi غير سعودي	King Abdulaziz University, Jeddah. جامعة الملك عبد العزيز، جدة	Radiology الأشعة	intern إنترن	>4.5	It is simulating human attitudes and abilities using computers and technology by teaching machines how humans think, behave, and react toward different situations. هو سلوك وخصائص معينة تتسم بها البرامج الحاسوبية، تجعلها تحاكي القدرات الذهنية البشرية وأنماط عملها.	Social Media (Facebook, Instagram, Snapchat, Tweeter,…). وسائل التواصل الاجتماعي, Internet (web pages, online databases,...). الإنترنت (صفحات الويب، قواعد البيانات، ...), Video games. ألعاب الفيديو, Family members. أفراد الأسرة	Yes- as a personal effort. نعم كرغبة شخصية	Yes نعم	Yes نعم	Yes نعم	No لا	Yes نعم	Yes نعم	Yes نعم	Yes نعم	Do not know لا أعلم	No لا	No لا	No لا
Agree أوافق	Female أنثى	38	Saudi سعودي	King Saud University, Riyadh. جامعة الملك سعود، الرياض	Nursing التمريض	Postgraduate (e.g. MSc. or PhD) دراسات عليا (ماجستير أو دكتوراه)	>4.5	It is simulating human attitudes and abilities using computers and technology by teaching machines how humans think, behave, and react toward different situations. هو سلوك وخصائص معينة تتسم بها البرامج الحاسوبية، تجعلها تحاكي القدرات الذهنية البشرية وأنماط عملها.	Social Media (Facebook, Instagram, Snapchat, Tweeter,…). وسائل التواصل الاجتماعي, Internet (web pages, online databases,...). الإنترنت (صفحات الويب، قواعد البيانات، ...)	No لا	Do not know لا أعلم	Yes نعم	Yes نعم	Do not know لا أعلم	Do not know لا أعلم	Do not know لا أعلم	Do not know لا أعلم	Yes نعم	Yes نعم	Do not know لا أعلم	Do not know لا أعلم	Do not know لا أعلم
Agree أوافق	Female أنثى	40	Saudi سعودي	King Abdulaziz University, Jeddah. جامعة الملك عبد العزيز، جدة	كيمياء حيوي	متخرج	3.5-4	It is simulating human attitudes and abilities using computers and technology by teaching machines how humans think, behave, and react toward different situations. هو سلوك وخصائص معينة تتسم بها البرامج الحاسوبية، تجعلها تحاكي القدرات الذهنية البشرية وأنماط عملها.	Print Media (books, magazines, newspapers). وسائل الإعلام المطبوعة (كتب، مجلات، صحف)., Broadcast Media (TV, Radio). وسائل الإعلام المرئية (تلفزيون ، راديو), Outdoor Media (e.g.Billboards, Transit Ads,..). وسائل الإعلام الخارجية (مثل اللوحات الإعلانية والجدارية،..), Social Media (Facebook, Instagram, Snapchat, Tweeter,…). وسائل التواصل الاجتماعي, Family members. أفراد الأسرة, Friends. أصدقاء	No لا	Yes نعم	Yes نعم	Yes نعم	Yes نعم	Yes نعم	Yes نعم	Yes نعم	Yes نعم	Do not know لا أعلم	Do not know لا أعلم	Do not know لا أعلم	Do not know لا أعلم
Agree أوافق	Female أنثى	27	Saudi سعودي	King Abdulaziz University, Jeddah. جامعة الملك عبد العزيز، جدة	ماجستير التنفيذ التعليم الالكتروني	Postgraduate (e.g. MSc. or PhD) دراسات عليا (ماجستير أو دكتوراه)	4-4.5	It is simulating human attitudes and abilities using computers and technology by teaching machines how humans think, behave, and react toward different situations. هو سلوك وخصائص معينة تتسم بها البرامج الحاسوبية، تجعلها تحاكي القدرات الذهنية البشرية وأنماط عملها.	Academic courses المناهج الدراسية, Print Media (books, magazines, newspapers). وسائل الإعلام المطبوعة (كتب، مجلات، صحف)., Broadcast Media (TV, Radio). وسائل الإعلام المرئية (تلفزيون ، راديو), Outdoor Media (e.g.Billboards, Transit Ads,..). وسائل الإعلام الخارجية (مثل اللوحات الإعلانية والجدارية،..), Social Media (Facebook, Instagram, Snapchat, Tweeter,…). وسائل التواصل الاجتماعي, Internet (web pa…	Yes- as a part of university curriculum. نعم كمنهج دراسي في الجامعة	Yes نعم	Yes نعم	Yes نعم	Yes نعم	Yes نعم	Yes نعم	Yes نعم	Yes نعم	Yes نعم	Yes نعم	Yes نعم	Yes نعم
Agree أوافق	Female أنثى	22	Saudi سعودي	King Abdulaziz University, Jeddah. جامعة الملك عبد العزيز، جدة	تغذية اكلينيكية	3rd year السنة الثالثة	4-4.5	It is simulating human attitudes and abilities using computers and technology by teaching machines how humans think, behave, and react toward different situations. هو سلوك وخصائص معينة تتسم بها البرامج الحاسوبية، تجعلها تحاكي القدرات الذهنية البشرية وأنماط عملها.	Social Media (Facebook, Instagram, Snapchat, Tweeter,…). وسائل التواصل الاجتماعي	No لا	Do not know لا أعلم	Yes نعم	Do not know لا أعلم	Yes نعم	No لا	Do not know لا أعلم	Yes نعم	Yes نعم	No لا	No لا	No لا	No لا
Agree أوافق	Female أنثى	20	Saudi سعودي	King Saud University, Riyadh. جامعة الملك سعود، الرياض	مختبرات اكلينيكيه	2nd year السنة الثانية	>4.5	It is simulating human attitudes and abilities using computers and technology by teaching machines how humans think, behave, and react toward different situations. هو سلوك وخصائص معينة تتسم بها البرامج الحاسوبية، تجعلها تحاكي القدرات الذهنية البشرية وأنماط عملها.	Academic courses المناهج الدراسية, Broadcast Media (TV, Radio). وسائل الإعلام المرئية (تلفزيون ، راديو), Social Media (Facebook, Instagram, Snapchat, Tweeter,…). وسائل التواصل الاجتماعي, Video games. ألعاب الفيديو	No لا	Do not know لا أعلم	Yes نعم	Yes نعم	Yes نعم	Yes نعم	Do not know لا أعلم	No لا	No لا	Yes نعم	Yes نعم	Yes نعم	Yes نعم
Agree أوافق	Female أنثى	21	Saudi سعودي	King Saud University, Riyadh. جامعة الملك سعود، الرياض	مختبرات طبية	3rd year السنة الثالثة	3.5-4	It is a medical dictionary used by healthcare consumers, students, and professionals. إنه قاموس طبي يستخدمه جمهور الرعاية الصحية والطلاب والمهنيون.	Academic courses المناهج الدراسية, Print Media (books, magazines, newspapers). وسائل الإعلام المطبوعة (كتب، مجلات، صحف)., Broadcast Media (TV, Radio). وسائل الإعلام المرئية (تلفزيون ، راديو), Social Media (Facebook, Instagram, Snapchat, Tweeter,…). وسائل التواصل الاجتماعي	No لا	Yes نعم	Yes نعم	Yes نعم	Yes نعم	Yes نعم	Do not know لا أعلم	No لا	No لا	No لا	Do not know لا أعلم	Do not know لا أعلم	Do not know لا أعلم
Agree أوافق	Female أنثى	21	Saudi سعودي	King Saud University, Riyadh. جامعة الملك سعود، الرياض	علوم مختبرات	2nd year السنة الثانية	4-4.5	It is simulating human attitudes and abilities using computers and technology by teaching machines how humans think, behave, and react toward different situations. هو سلوك وخصائص معينة تتسم بها البرامج الحاسوبية، تجعلها تحاكي القدرات الذهنية البشرية وأنماط عملها.	Print Media (books, magazines, newspapers). وسائل الإعلام المطبوعة (كتب، مجلات، صحف)., Social Media (Facebook, Instagram, Snapchat, Tweeter,…). وسائل التواصل الاجتماعي, Internet (web pages, online databases,...). الإنترنت (صفحات الويب، قواعد البيانات، ...)	No لا	Do not know لا أعلم	No لا	Do not know لا أعلم	Yes نعم	Yes نعم	Yes نعم	Do not know لا أعلم	No لا	No لا	No لا	No لا	Yes نعم
Agree أوافق	Female أنثى	20	Saudi سعودي	King Saud University, Riyadh. جامعة الملك سعود، الرياض	مختبرات طبية	3rd year السنة الثالثة	3.5-4	It is simulating human attitudes and abilities using computers and technology by teaching machines how humans think, behave, and react toward different situations. هو سلوك وخصائص معينة تتسم بها البرامج الحاسوبية، تجعلها تحاكي القدرات الذهنية البشرية وأنماط عملها.	Broadcast Media (TV, Radio). وسائل الإعلام المرئية (تلفزيون ، راديو), Outdoor Media (e.g.Billboards, Transit Ads,..). وسائل الإعلام الخارجية (مثل اللوحات الإعلانية والجدارية،..), Social Media (Facebook, Instagram, Snapchat, Tweeter,…). وسائل التواصل الاجتماعي, Internet (web pages, online databases,...). الإنترنت (صفحات الويب، قواعد البيانات، ...), Video games. ألعاب الفيديو, Family members. أفراد…	No لا	Yes نعم	Yes نعم	No لا	No لا	Yes نعم	Yes نعم	Yes نعم	Yes نعم	No لا	No لا	No لا	No لا
Agree أوافق	Female أنثى	21	Saudi سعودي	King Saud University, Riyadh. جامعة الملك سعود، الرياض	مختبرات طبية	3rd year السنة الثالثة	>4.5	It is simulating human attitudes and abilities using computers and technology by teaching machines how humans think, behave, and react toward different situations. هو سلوك وخصائص معينة تتسم بها البرامج الحاسوبية، تجعلها تحاكي القدرات الذهنية البشرية وأنماط عملها.	Academic courses المناهج الدراسية, Internet (web pages, online databases,...). الإنترنت (صفحات الويب، قواعد البيانات، ...)	No لا	Yes نعم	Do not know لا أعلم	Yes نعم	No لا	Yes نعم	Yes نعم	Do not know لا أعلم	Yes نعم	Yes نعم	Yes نعم	Do not know لا أعلم	Do not know لا أعلم
Agree أوافق	Female أنثى	20	Saudi سعودي	King Saud University, Riyadh. جامعة الملك سعود، الرياض	مختبرات طبية	3rd year السنة الثالثة	4-4.5	It is simulating human attitudes and abilities using computers and technology by teaching machines how humans think, behave, and react toward different situations. هو سلوك وخصائص معينة تتسم بها البرامج الحاسوبية، تجعلها تحاكي القدرات الذهنية البشرية وأنماط عملها.	Print Media (books, magazines, newspapers). وسائل الإعلام المطبوعة (كتب، مجلات، صحف)., Social Media (Facebook, Instagram, Snapchat, Tweeter,…). وسائل التواصل الاجتماعي, Internet (web pages, online databases,...). الإنترنت (صفحات الويب، قواعد البيانات، ...)	No لا	Yes نعم	Yes نعم	Yes نعم	Yes نعم	No لا	Yes نعم	Yes نعم	Yes نعم	Do not know لا أعلم	Yes نعم	No لا	Do not know لا أعلم
Agree أوافق	Female أنثى	19	Saudi سعودي	King Saud University, Riyadh. جامعة الملك سعود، الرياض	Healthcare Administration الإدارة الصحية	1st year السنة الأولى	≤3.5	It is simulating human attitudes and abilities using computers and technology by teaching machines how humans think, behave, and react toward different situations. هو سلوك وخصائص معينة تتسم بها البرامج الحاسوبية، تجعلها تحاكي القدرات الذهنية البشرية وأنماط عملها.	Academic courses المناهج الدراسية, Broadcast Media (TV, Radio). وسائل الإعلام المرئية (تلفزيون ، راديو), Social Media (Facebook, Instagram, Snapchat, Tweeter,…). وسائل التواصل الاجتماعي, Internet (web pages, online databases,...). الإنترنت (صفحات الويب، قواعد البيانات، ...), Family members. أفراد الأسرة, Friends. أصدقاء	Yes- as a part of university curriculum. نعم كمنهج دراسي في الجامعة	Yes نعم	Do not know لا أعلم	Yes نعم	Yes نعم	Do not know لا أعلم	Do not know لا أعلم	No لا	Yes نعم	No لا	Do not know لا أعلم	Yes نعم	Do not know لا أعلم
Agree أوافق	Female أنثى	23	Saudi سعودي	King Saud University, Riyadh. جامعة الملك سعود، الرياض	Clinical laboratory مختبرات طبية	3rd year السنة الثالثة	4-4.5	It is simulating human attitudes and abilities using computers and technology by teaching machines how humans think, behave, and react toward different situations. هو سلوك وخصائص معينة تتسم بها البرامج الحاسوبية، تجعلها تحاكي القدرات الذهنية البشرية وأنماط عملها.	Social Media (Facebook, Instagram, Snapchat, Tweeter,…). وسائل التواصل الاجتماعي, Internet (web pages, online databases,...). الإنترنت (صفحات الويب، قواعد البيانات، ...), Family members. أفراد الأسرة	No لا	Yes نعم	Yes نعم	Do not know لا أعلم	No لا	Yes نعم	Do not know لا أعلم	No لا	Yes نعم	Yes نعم	No لا	Yes نعم	No لا
Agree أوافق	Female أنثى	20	Saudi سعودي	King Faisal University, Riyadh. جامعة الملك فيصل، الرياض	مختبرات	3rd year السنة الثالثة	4-4.5	It is simulating human attitudes and abilities using computers and technology by teaching machines how humans think, behave, and react toward different situations. هو سلوك وخصائص معينة تتسم بها البرامج الحاسوبية، تجعلها تحاكي القدرات الذهنية البشرية وأنماط عملها.	Social Media (Facebook, Instagram, Snapchat, Tweeter,…). وسائل التواصل الاجتماعي	No لا	Yes نعم	Yes نعم	Yes نعم	No لا	No لا	Do not know لا أعلم	No لا	No لا	Yes نعم	Yes نعم	Yes نعم	Yes نعم
Agree أوافق	Female أنثى	19	Saudi سعودي	King Saud University, Riyadh. جامعة الملك سعود، الرياض	مختبرات	3rd year السنة الثالثة	>4.5	It is simulating human attitudes and abilities using computers and technology by teaching machines how humans think, behave, and react toward different situations. هو سلوك وخصائص معينة تتسم بها البرامج الحاسوبية، تجعلها تحاكي القدرات الذهنية البشرية وأنماط عملها.	Academic courses المناهج الدراسية, Print Media (books, magazines, newspapers). وسائل الإعلام المطبوعة (كتب، مجلات، صحف)., Broadcast Media (TV, Radio). وسائل الإعلام المرئية (تلفزيون ، راديو), Outdoor Media (e.g.Billboards, Transit Ads,..). وسائل الإعلام الخارجية (مثل اللوحات الإعلانية والجدارية،..), Social Media (Facebook, Instagram, Snapchat, Tweeter,…). وسائل التواصل الاجتماعي, Internet (web pa…	No لا	Yes نعم	Yes نعم	Yes نعم	Yes نعم	Yes نعم	Yes نعم	Yes نعم	Yes نعم	Do not know لا أعلم	Do not know لا أعلم	Yes نعم	Yes نعم
Agree أوافق	Female أنثى	24	Saudi سعودي	جامعة الامام عبدالرحمن بن فيصل، الدمام	تقنية قلب	خريجة درجة البكالوريوس	4-4.5	It is simulating human attitudes and abilities using computers and technology by teaching machines how humans think, behave, and react toward different situations. هو سلوك وخصائص معينة تتسم بها البرامج الحاسوبية، تجعلها تحاكي القدرات الذهنية البشرية وأنماط عملها.	Broadcast Media (TV, Radio). وسائل الإعلام المرئية (تلفزيون ، راديو), Social Media (Facebook, Instagram, Snapchat, Tweeter,…). وسائل التواصل الاجتماعي, Internet (web pages, online databases,...). الإنترنت (صفحات الويب، قواعد البيانات، ...)	No لا	Yes نعم	Yes نعم	Yes نعم	Yes نعم	Do not know لا أعلم	Yes نعم	No لا	Yes نعم	No لا	No لا	No لا	No لا
Agree أوافق	Female أنثى	24	Saudi سعودي	Alexandria	Medicine الطب	5th year السنة الخامسة	4-4.5	It is simulating human attitudes and abilities using computers and technology by teaching machines how humans think, behave, and react toward different situations. هو سلوك وخصائص معينة تتسم بها البرامج الحاسوبية، تجعلها تحاكي القدرات الذهنية البشرية وأنماط عملها.	Print Media (books, magazines, newspapers). وسائل الإعلام المطبوعة (كتب، مجلات، صحف)., Broadcast Media (TV, Radio). وسائل الإعلام المرئية (تلفزيون ، راديو), Social Media (Facebook, Instagram, Snapchat, Tweeter,…). وسائل التواصل الاجتماعي, Internet (web pages, online databases,...). الإنترنت (صفحات الويب، قواعد البيانات، ...), Video games. ألعاب الفيديو, Family members. أفراد الأسرة	No لا	Yes نعم	Yes نعم	Yes نعم	No لا	Yes نعم	Yes نعم	No لا	Yes نعم	No لا	Yes نعم	Yes نعم	Yes نعم
Agree أوافق	Female أنثى	43	Saudi سعودي	King Abdulaziz University, Jeddah. جامعة الملك عبد العزيز، جدة	Dentistry طب الأسنان	Postgraduate (e.g. MSc. or PhD) دراسات عليا (ماجستير أو دكتوراه)	4-4.5	It is simulating human attitudes and abilities using computers and technology by teaching machines how humans think, behave, and react toward different situations. هو سلوك وخصائص معينة تتسم بها البرامج الحاسوبية، تجعلها تحاكي القدرات الذهنية البشرية وأنماط عملها.	Broadcast Media (TV, Radio). وسائل الإعلام المرئية (تلفزيون ، راديو), Internet (web pages, online databases,...). الإنترنت (صفحات الويب، قواعد البيانات، ...), Friends. أصدقاء	No لا	Yes نعم	Yes نعم	Yes نعم	Do not know لا أعلم	Yes نعم	Do not know لا أعلم	Yes نعم	Yes نعم	No لا	No لا	No لا	No لا
Agree أوافق	Female أنثى	23	Saudi سعودي	اسكندرية	Medicine الطب	intern إنترن	≤3.5	It is simulating human attitudes and abilities using computers and technology by teaching machines how humans think, behave, and react toward different situations. هو سلوك وخصائص معينة تتسم بها البرامج الحاسوبية، تجعلها تحاكي القدرات الذهنية البشرية وأنماط عملها.	Print Media (books, magazines, newspapers). وسائل الإعلام المطبوعة (كتب، مجلات، صحف)., Internet (web pages, online databases,...). الإنترنت (صفحات الويب، قواعد البيانات، ...)	No لا	Yes نعم	Yes نعم	Yes نعم	Yes نعم	Yes نعم	No لا	No لا	Yes نعم	No لا	No لا	Yes نعم	Yes نعم
Agree أوافق	Female أنثى	24	Saudi سعودي	Alfaisal University- riyadh	Medicine الطب	intern إنترن	≤3.5	It is simulating human attitudes and abilities using computers and technology by teaching machines how humans think, behave, and react toward different situations. هو سلوك وخصائص معينة تتسم بها البرامج الحاسوبية، تجعلها تحاكي القدرات الذهنية البشرية وأنماط عملها.	Academic courses المناهج الدراسية, Print Media (books, magazines, newspapers). وسائل الإعلام المطبوعة (كتب، مجلات، صحف)., Broadcast Media (TV, Radio). وسائل الإعلام المرئية (تلفزيون ، راديو), Outdoor Media (e.g.Billboards, Transit Ads,..). وسائل الإعلام الخارجية (مثل اللوحات الإعلانية والجدارية،..), Social Media (Facebook, Instagram, Snapchat, Tweeter,…). وسائل التواصل الاجتماعي, Internet (web pa…	No لا	Yes نعم	Yes نعم	Yes نعم	No لا	Yes نعم	Yes نعم	No لا	No لا	Yes نعم	Yes نعم	Yes نعم	Yes نعم
Agree أوافق	Female أنثى	20	Saudi سعودي	جامعة دار العلوم. Dar Al Uloom University	Medicine الطب	1st year السنة الأولى	>4.5	It is simulating human attitudes and abilities using computers and technology by teaching machines how humans think, behave, and react toward different situations. هو سلوك وخصائص معينة تتسم بها البرامج الحاسوبية، تجعلها تحاكي القدرات الذهنية البشرية وأنماط عملها.	Social Media (Facebook, Instagram, Snapchat, Tweeter,…). وسائل التواصل الاجتماعي, Internet (web pages, online databases,...). الإنترنت (صفحات الويب، قواعد البيانات، ...), Family members. أفراد الأسرة, Friends. أصدقاء	No لا	Yes نعم	Yes نعم	Yes نعم	Do not know لا أعلم	No لا	Yes نعم	No لا	Yes نعم	Do not know لا أعلم	No لا	No لا	No لا
Agree أوافق	Male ذكر	70	Saudi سعودي	Batterjee Medical College, Jeddah. كلية البترجي الطبية، جدة	متقاعد	Postgraduate (e.g. MSc. or PhD) دراسات عليا (ماجستير أو دكتوراه)	≤3.5	It is simulating human attitudes and abilities using computers and technology by teaching machines how humans think, behave, and react toward different situations. هو سلوك وخصائص معينة تتسم بها البرامج الحاسوبية، تجعلها تحاكي القدرات الذهنية البشرية وأنماط عملها.	Broadcast Media (TV, Radio). وسائل الإعلام المرئية (تلفزيون ، راديو), Social Media (Facebook, Instagram, Snapchat, Tweeter,…). وسائل التواصل الاجتماعي, Video games. ألعاب الفيديو	No لا	Yes نعم	Yes نعم	Yes نعم	Do not know لا أعلم	Do not know لا أعلم	Do not know لا أعلم	Yes نعم	Yes نعم	No لا	Do not know لا أعلم	Do not know لا أعلم	Do not know لا أعلم
Agree أوافق	Female أنثى	24	Saudi سعودي	Imam Abdulrahman Bin Faisal University	Cardiovascular Technology	Fresh graduate	>4.5	It is simulating human attitudes and abilities using computers and technology by teaching machines how humans think, behave, and react toward different situations. هو سلوك وخصائص معينة تتسم بها البرامج الحاسوبية، تجعلها تحاكي القدرات الذهنية البشرية وأنماط عملها.	Coursera	Yes- as a personal effort. نعم كرغبة شخصية	Yes نعم	Yes نعم	Yes نعم	Yes نعم	No لا	Yes نعم	Yes نعم	Yes نعم	Yes نعم	Do not know لا أعلم	Yes نعم	Do not know لا أعلم
Agree أوافق	Female أنثى	25	Saudi سعودي	كلية طب القصر العيني	Medicine الطب	4th year السنة الرابعة	≤3.5	It is simulating human attitudes and abilities using computers and technology by teaching machines how humans think, behave, and react toward different situations. هو سلوك وخصائص معينة تتسم بها البرامج الحاسوبية، تجعلها تحاكي القدرات الذهنية البشرية وأنماط عملها.	Academic courses المناهج الدراسية, Broadcast Media (TV, Radio). وسائل الإعلام المرئية (تلفزيون ، راديو), Outdoor Media (e.g.Billboards, Transit Ads,..). وسائل الإعلام الخارجية (مثل اللوحات الإعلانية والجدارية،..), Social Media (Facebook, Instagram, Snapchat, Tweeter,…). وسائل التواصل الاجتماعي	No لا	Do not know لا أعلم	Yes نعم	Yes نعم	No لا	Yes نعم	Yes نعم	Yes نعم	Yes نعم	No لا	Do not know لا أعلم	Do not know لا أعلم	Do not know لا أعلم
Agree أوافق	Male ذكر	42	Saudi سعودي	معهد الادارة العامة بالرياض	Medical administration	خريج	≤3.5	It is simulating human attitudes and abilities using computers and technology by teaching machines how humans think, behave, and react toward different situations. هو سلوك وخصائص معينة تتسم بها البرامج الحاسوبية، تجعلها تحاكي القدرات الذهنية البشرية وأنماط عملها.	Print Media (books, magazines, newspapers). وسائل الإعلام المطبوعة (كتب، مجلات، صحف)., Broadcast Media (TV, Radio). وسائل الإعلام المرئية (تلفزيون ، راديو), Outdoor Media (e.g.Billboards, Transit Ads,..). وسائل الإعلام الخارجية (مثل اللوحات الإعلانية والجدارية،..), Social Media (Facebook, Instagram, Snapchat, Tweeter,…). وسائل التواصل الاجتماعي, Internet (web pages, online databases,...). الإنترن…	No لا	Yes نعم	Yes نعم	Do not know لا أعلم	Yes نعم	Yes نعم	Yes نعم	No لا	Yes نعم	No لا	No لا	No لا	No لا
Agree أوافق	Female أنثى	18	Saudi سعودي	جامعة الأمام عبدالرحمن بن فيصل	Medicine الطب	1st year السنة الأولى	>4.5	It is simulating human attitudes and abilities using computers and technology by teaching machines how humans think, behave, and react toward different situations. هو سلوك وخصائص معينة تتسم بها البرامج الحاسوبية، تجعلها تحاكي القدرات الذهنية البشرية وأنماط عملها.	Academic courses المناهج الدراسية, Broadcast Media (TV, Radio). وسائل الإعلام المرئية (تلفزيون ، راديو), Social Media (Facebook, Instagram, Snapchat, Tweeter,…). وسائل التواصل الاجتماعي, Family members. أفراد الأسرة, Friends. أصدقاء	No لا	Yes نعم	Yes نعم	Do not know لا أعلم	No لا	Yes نعم	Yes نعم	No لا	Yes نعم	Do not know لا أعلم	No لا	No لا	No لا
Agree أوافق	Female أنثى	27	Saudi سعودي	Riyadh Elm University	Dentistry طب الأسنان	Postgraduate (e.g. MSc. or PhD) دراسات عليا (ماجستير أو دكتوراه)	>4.5	It is simulating human attitudes and abilities using computers and technology by teaching machines how humans think, behave, and react toward different situations. هو سلوك وخصائص معينة تتسم بها البرامج الحاسوبية، تجعلها تحاكي القدرات الذهنية البشرية وأنماط عملها.	Broadcast Media (TV, Radio). وسائل الإعلام المرئية (تلفزيون ، راديو), Internet (web pages, online databases,...). الإنترنت (صفحات الويب، قواعد البيانات، ...)	Yes- as a personal effort. نعم كرغبة شخصية	Yes نعم	Yes نعم	Yes نعم	Do not know لا أعلم	Yes نعم	Yes نعم	Do not know لا أعلم	Yes نعم	Yes نعم	Do not know لا أعلم	Do not know لا أعلم	Do not know لا أعلم
Agree أوافق	Female أنثى	19	Non-Saudi غير سعودي	جامعة الملك سعود للعلوم الصحيه في جدة	Preparatory Year السنة التحضيرية	Preparatory Year السنة التحضيرية	4-4.5	It is simulating human attitudes and abilities using computers and technology by teaching machines how humans think, behave, and react toward different situations. هو سلوك وخصائص معينة تتسم بها البرامج الحاسوبية، تجعلها تحاكي القدرات الذهنية البشرية وأنماط عملها.	Social Media (Facebook, Instagram, Snapchat, Tweeter,…). وسائل التواصل الاجتماعي, Internet (web pages, online databases,...). الإنترنت (صفحات الويب، قواعد البيانات، ...)	No لا	Yes نعم	Do not know لا أعلم	Yes نعم	No لا	Yes نعم	No لا	Yes نعم	Yes نعم	No لا	Yes نعم	Do not know لا أعلم	Yes نعم
Agree أوافق	Female أنثى	24	Saudi سعودي	Jazan University, Jazan. جامعة جازان، جازان	Dentistry طب الأسنان	intern إنترن	4-4.5	It is a type of medical drug used to improve intelligence, but it causes side effects such as skin rashes. هو نوع من الأدوية الطبية يستخدم لتحسين الذكاء ، لكنه يسبب آثارًا جانبية مثل الطفح الجلدي	Print Media (books, magazines, newspapers). وسائل الإعلام المطبوعة (كتب، مجلات، صحف).	Yes- as a personal effort. نعم كرغبة شخصية	Yes نعم	Yes نعم	Yes نعم	Yes نعم	Yes نعم	Do not know لا أعلم	Yes نعم	Yes نعم	No لا	No لا	Do not know لا أعلم	Yes نعم
Agree أوافق	Female أنثى	26	Saudi سعودي	Jazan University, Jazan. جامعة جازان، جازان	Dentistry طب الأسنان	intern إنترن	≤3.5	It is simulating human attitudes and abilities using computers and technology by teaching machines how humans think, behave, and react toward different situations. هو سلوك وخصائص معينة تتسم بها البرامج الحاسوبية، تجعلها تحاكي القدرات الذهنية البشرية وأنماط عملها.	Academic courses المناهج الدراسية, Social Media (Facebook, Instagram, Snapchat, Tweeter,…). وسائل التواصل الاجتماعي, Internet (web pages, online databases,...). الإنترنت (صفحات الويب، قواعد البيانات، ...)	No لا	Yes نعم	Yes نعم	Yes نعم	Yes نعم	Do not know لا أعلم	Yes نعم	Yes نعم	Yes نعم	Do not know لا أعلم	Do not know لا أعلم	Do not know لا أعلم	Do not know لا أعلم
Agree أوافق	Female أنثى	21	Saudi سعودي	King Saud University, Riyadh. جامعة الملك سعود، الرياض	Pharmacy الصيدلة	4th year السنة الرابعة	>4.5	It is simulating human attitudes and abilities using computers and technology by teaching machines how humans think, behave, and react toward different situations. هو سلوك وخصائص معينة تتسم بها البرامج الحاسوبية، تجعلها تحاكي القدرات الذهنية البشرية وأنماط عملها.	Social Media (Facebook, Instagram, Snapchat, Tweeter,…). وسائل التواصل الاجتماعي, Internet (web pages, online databases,...). الإنترنت (صفحات الويب، قواعد البيانات، ...)	No لا	Yes نعم	Yes نعم	Yes نعم	Yes نعم	Yes نعم	Yes نعم	Yes نعم	Yes نعم	No لا	Do not know لا أعلم	No لا	Yes نعم
Agree أوافق	Female أنثى	22	Saudi سعودي	King Saud University, Riyadh. جامعة الملك سعود، الرياض	Pharmacy الصيدلة	3rd year السنة الثالثة	>4.5	It is simulating human attitudes and abilities using computers and technology by teaching machines how humans think, behave, and react toward different situations. هو سلوك وخصائص معينة تتسم بها البرامج الحاسوبية، تجعلها تحاكي القدرات الذهنية البشرية وأنماط عملها.	Broadcast Media (TV, Radio). وسائل الإعلام المرئية (تلفزيون ، راديو), Social Media (Facebook, Instagram, Snapchat, Tweeter,…). وسائل التواصل الاجتماعي, Video games. ألعاب الفيديو	No لا	Yes نعم	Yes نعم	Yes نعم	Yes نعم	Yes نعم	Yes نعم	Yes نعم	Yes نعم	Yes نعم	No لا	No لا	Yes نعم
Agree أوافق	Female أنثى	21	Saudi سعودي	King Saud University, Riyadh. جامعة الملك سعود، الرياض	Pharmacy الصيدلة	3rd year السنة الثالثة	4-4.5	It is simulating human attitudes and abilities using computers and technology by teaching machines how humans think, behave, and react toward different situations. هو سلوك وخصائص معينة تتسم بها البرامج الحاسوبية، تجعلها تحاكي القدرات الذهنية البشرية وأنماط عملها.	Academic courses المناهج الدراسية	No لا	No لا	Do not know لا أعلم	Do not know لا أعلم	Do not know لا أعلم	Do not know لا أعلم	Do not know لا أعلم	Do not know لا أعلم	Do not know لا أعلم	Do not know لا أعلم	Do not know لا أعلم	Do not know لا أعلم	Do not know لا أعلم
Agree أوافق	Female أنثى	20	Saudi سعودي	King Saud University, Riyadh. جامعة الملك سعود، الرياض	Pharmacy الصيدلة	4th year السنة الرابعة	4-4.5	It is simulating human attitudes and abilities using computers and technology by teaching machines how humans think, behave, and react toward different situations. هو سلوك وخصائص معينة تتسم بها البرامج الحاسوبية، تجعلها تحاكي القدرات الذهنية البشرية وأنماط عملها.	Academic courses المناهج الدراسية, Broadcast Media (TV, Radio). وسائل الإعلام المرئية (تلفزيون ، راديو), Social Media (Facebook, Instagram, Snapchat, Tweeter,…). وسائل التواصل الاجتماعي, Friends. أصدقاء	No لا	Yes نعم	No لا	No لا	Do not know لا أعلم	No لا	Do not know لا أعلم	No لا	No لا	No لا	Do not know لا أعلم	Yes نعم	No لا
Agree أوافق	Female أنثى	21	Saudi سعودي	جامعة الحرس	Medicine الطب	4th year السنة الرابعة	>4.5	It is simulating human attitudes and abilities using computers and technology by teaching machines how humans think, behave, and react toward different situations. هو سلوك وخصائص معينة تتسم بها البرامج الحاسوبية، تجعلها تحاكي القدرات الذهنية البشرية وأنماط عملها.	Social Media (Facebook, Instagram, Snapchat, Tweeter,…). وسائل التواصل الاجتماعي	No لا	Yes نعم	Yes نعم	Yes نعم	Yes نعم	Yes نعم	Yes نعم	Yes نعم	Yes نعم	No لا	No لا	No لا	No لا
Agree أوافق	Female أنثى	21	Saudi سعودي	King Saud University, Riyadh. جامعة الملك سعود، الرياض	تغذيه اكلينيكيه	4th year السنة الرابعة	>4.5	It is simulating human attitudes and abilities using computers and technology by teaching machines how humans think, behave, and react toward different situations. هو سلوك وخصائص معينة تتسم بها البرامج الحاسوبية، تجعلها تحاكي القدرات الذهنية البشرية وأنماط عملها.	Social Media (Facebook, Instagram, Snapchat, Tweeter,…). وسائل التواصل الاجتماعي, Internet (web pages, online databases,...). الإنترنت (صفحات الويب، قواعد البيانات، ...), Family members. أفراد الأسرة	No لا	Yes نعم	Yes نعم	Yes نعم	Do not know لا أعلم	Yes نعم	Yes نعم	Yes نعم	Yes نعم	Do not know لا أعلم	Yes نعم	No لا	Yes نعم
Agree أوافق	Female أنثى	21	Saudi سعودي	King Saud University, Riyadh. جامعة الملك سعود، الرياض	التغذية السريرية Clinical Nutrition	3rd year السنة الثالثة	3.5-4	It is simulating human attitudes and abilities using computers and technology by teaching machines how humans think, behave, and react toward different situations. هو سلوك وخصائص معينة تتسم بها البرامج الحاسوبية، تجعلها تحاكي القدرات الذهنية البشرية وأنماط عملها.	Social Media (Facebook, Instagram, Snapchat, Tweeter,…). وسائل التواصل الاجتماعي, Family members. أفراد الأسرة, Friends. أصدقاء	No لا	Yes نعم	Yes نعم	Yes نعم	No لا	Yes نعم	Yes نعم	Do not know لا أعلم	No لا	No لا	Do not know لا أعلم	Do not know لا أعلم	Do not know لا أعلم
Agree أوافق	Female أنثى	20	Saudi سعودي	King Saud University, Riyadh. جامعة الملك سعود، الرياض	Pharmacy الصيدلة	5th year السنة الخامسة	>4.5	It is simulating human attitudes and abilities using computers and technology by teaching machines how humans think, behave, and react toward different situations. هو سلوك وخصائص معينة تتسم بها البرامج الحاسوبية، تجعلها تحاكي القدرات الذهنية البشرية وأنماط عملها.	Broadcast Media (TV, Radio). وسائل الإعلام المرئية (تلفزيون ، راديو), Outdoor Media (e.g.Billboards, Transit Ads,..). وسائل الإعلام الخارجية (مثل اللوحات الإعلانية والجدارية،..), Social Media (Facebook, Instagram, Snapchat, Tweeter,…). وسائل التواصل الاجتماعي, Internet (web pages, online databases,...). الإنترنت (صفحات الويب، قواعد البيانات، ...), Family members. أفراد الأسرة, Friends. أصدقاء	No لا	Yes نعم	Yes نعم	Yes نعم	Yes نعم	Yes نعم	Yes نعم	No لا	Yes نعم	No لا	No لا	No لا	No لا
Agree أوافق	Female أنثى	21	Saudi سعودي	King Saud University, Riyadh. جامعة الملك سعود، الرياض	Pharmacy الصيدلة	4th year السنة الرابعة	>4.5	It is simulating human attitudes and abilities using computers and technology by teaching machines how humans think, behave, and react toward different situations. هو سلوك وخصائص معينة تتسم بها البرامج الحاسوبية، تجعلها تحاكي القدرات الذهنية البشرية وأنماط عملها.	Broadcast Media (TV, Radio). وسائل الإعلام المرئية (تلفزيون ، راديو), Social Media (Facebook, Instagram, Snapchat, Tweeter,…). وسائل التواصل الاجتماعي, Internet (web pages, online databases,...). الإنترنت (صفحات الويب، قواعد البيانات، ...)	No لا	Yes نعم	Yes نعم	Do not know لا أعلم	Yes نعم	Yes نعم	Yes نعم	Yes نعم	Yes نعم	No لا	Yes نعم	Yes نعم	No لا
Agree أوافق	Male ذكر	21	Saudi سعودي	King Saud University, Riyadh. جامعة الملك سعود، الرياض	Pharmacy الصيدلة	3rd year السنة الثالثة	3.5-4	It is simulating human attitudes and abilities using computers and technology by teaching machines how humans think, behave, and react toward different situations. هو سلوك وخصائص معينة تتسم بها البرامج الحاسوبية، تجعلها تحاكي القدرات الذهنية البشرية وأنماط عملها.	Broadcast Media (TV, Radio). وسائل الإعلام المرئية (تلفزيون ، راديو), Social Media (Facebook, Instagram, Snapchat, Tweeter,…). وسائل التواصل الاجتماعي, Friends. أصدقاء	No لا	Yes نعم	Yes نعم	Yes نعم	Do not know لا أعلم	Yes نعم	Yes نعم	Do not know لا أعلم	Yes نعم	Do not know لا أعلم	Do not know لا أعلم	Do not know لا أعلم	Do not know لا أعلم
Agree أوافق	Female أنثى	24	Saudi سعودي	Jazan University, Jazan. جامعة جازان، جازان	Dentistry طب الأسنان	intern إنترن	3.5-4	It is simulating human attitudes and abilities using computers and technology by teaching machines how humans think, behave, and react toward different situations. هو سلوك وخصائص معينة تتسم بها البرامج الحاسوبية، تجعلها تحاكي القدرات الذهنية البشرية وأنماط عملها.	Social Media (Facebook, Instagram, Snapchat, Tweeter,…). وسائل التواصل الاجتماعي, Family members. أفراد الأسرة	No لا	Yes نعم	Yes نعم	Yes نعم	Yes نعم	Yes نعم	Yes نعم	Yes نعم	Yes نعم	No لا	Do not know لا أعلم	Do not know لا أعلم	Do not know لا أعلم
Agree أوافق	Female أنثى	24	Saudi سعودي	Jazan University, Jazan. جامعة جازان، جازان	Medicine الطب	intern إنترن	4-4.5	It is simulating human attitudes and abilities using computers and technology by teaching machines how humans think, behave, and react toward different situations. هو سلوك وخصائص معينة تتسم بها البرامج الحاسوبية، تجعلها تحاكي القدرات الذهنية البشرية وأنماط عملها.	Print Media (books, magazines, newspapers). وسائل الإعلام المطبوعة (كتب، مجلات، صحف)., Social Media (Facebook, Instagram, Snapchat, Tweeter,…). وسائل التواصل الاجتماعي, Friends. أصدقاء	No لا	Yes نعم	Yes نعم	Yes نعم	Yes نعم	Yes نعم	Yes نعم	No لا	No لا	No لا	Do not know لا أعلم	Do not know لا أعلم	Do not know لا أعلم
Agree أوافق	Male ذكر	21	Saudi سعودي	University College Dublin	Medicine الطب	3rd year السنة الثالثة	4-4.5	It is simulating human attitudes and abilities using computers and technology by teaching machines how humans think, behave, and react toward different situations. هو سلوك وخصائص معينة تتسم بها البرامج الحاسوبية، تجعلها تحاكي القدرات الذهنية البشرية وأنماط عملها.	Academic courses المناهج الدراسية, Social Media (Facebook, Instagram, Snapchat, Tweeter,…). وسائل التواصل الاجتماعي, Family members. أفراد الأسرة, Friends. أصدقاء	No لا	Yes نعم	Yes نعم	Yes نعم	No لا	Do not know لا أعلم	Yes نعم	No لا	Yes نعم	Yes نعم	No لا	No لا	No لا
Agree أوافق	Female أنثى	22	Saudi سعودي	King Abdulaziz University, Jeddah. جامعة الملك عبد العزيز، جدة	مختبرات	intern إنترن	4-4.5	It is simulating human attitudes and abilities using computers and technology by teaching machines how humans think, behave, and react toward different situations. هو سلوك وخصائص معينة تتسم بها البرامج الحاسوبية، تجعلها تحاكي القدرات الذهنية البشرية وأنماط عملها.	Social Media (Facebook, Instagram, Snapchat, Tweeter,…). وسائل التواصل الاجتماعي, Internet (web pages, online databases,...). الإنترنت (صفحات الويب، قواعد البيانات، ...)	No لا	Yes نعم	Yes نعم	Do not know لا أعلم	Do not know لا أعلم	Yes نعم	Yes نعم	No لا	Do not know لا أعلم	Yes نعم	No لا	No لا	No لا
Agree أوافق	Female أنثى	30	Saudi سعودي	King Abdulaziz University, Jeddah. جامعة الملك عبد العزيز، جدة	مختبرات طبية	متخرجة بكالوريوس	4-4.5	It is simulating human attitudes and abilities using computers and technology by teaching machines how humans think, behave, and react toward different situations. هو سلوك وخصائص معينة تتسم بها البرامج الحاسوبية، تجعلها تحاكي القدرات الذهنية البشرية وأنماط عملها.	Broadcast Media (TV, Radio). وسائل الإعلام المرئية (تلفزيون ، راديو), Internet (web pages, online databases,...). الإنترنت (صفحات الويب، قواعد البيانات، ...), Family members. أفراد الأسرة, Friends. أصدقاء	No لا	Yes نعم	Yes نعم	Yes نعم	Do not know لا أعلم	Yes نعم	Yes نعم	Yes نعم	Yes نعم	No لا	No لا	No لا	No لا
Agree أوافق	Male ذكر	19	Saudi سعودي	University college dublin	Medicine الطب	1st year السنة الأولى	4-4.5	It is simulating human attitudes and abilities using computers and technology by teaching machines how humans think, behave, and react toward different situations. هو سلوك وخصائص معينة تتسم بها البرامج الحاسوبية، تجعلها تحاكي القدرات الذهنية البشرية وأنماط عملها.	Academic courses المناهج الدراسية, Social Media (Facebook, Instagram, Snapchat, Tweeter,…). وسائل التواصل الاجتماعي, Family members. أفراد الأسرة, Friends. أصدقاء	No لا	Yes نعم	Yes نعم	Yes نعم	Yes نعم	Yes نعم	Yes نعم	Yes نعم	Yes نعم	Yes نعم	No لا	No لا	No لا
Agree أوافق	Female أنثى	32	Saudi سعودي	Arap development	Nursing التمريض	Moh	3.5-4	It is simulating human attitudes and abilities using computers and technology by teaching machines how humans think, behave, and react toward different situations. هو سلوك وخصائص معينة تتسم بها البرامج الحاسوبية، تجعلها تحاكي القدرات الذهنية البشرية وأنماط عملها.	Social Media (Facebook, Instagram, Snapchat, Tweeter,…). وسائل التواصل الاجتماعي	No لا	Do not know لا أعلم	Do not know لا أعلم	Do not know لا أعلم	Do not know لا أعلم	Do not know لا أعلم	Do not know لا أعلم	No لا	No لا	Do not know لا أعلم	Do not know لا أعلم	Do not know لا أعلم	Do not know لا أعلم
Agree أوافق	Female أنثى	30	Saudi سعودي	جامعة الدمام	Nursing التمريض	متخرج	3.5-4	It is simulating human attitudes and abilities using computers and technology by teaching machines how humans think, behave, and react toward different situations. هو سلوك وخصائص معينة تتسم بها البرامج الحاسوبية، تجعلها تحاكي القدرات الذهنية البشرية وأنماط عملها.	Broadcast Media (TV, Radio). وسائل الإعلام المرئية (تلفزيون ، راديو), Social Media (Facebook, Instagram, Snapchat, Tweeter,…). وسائل التواصل الاجتماعي	No لا	Yes نعم	Yes نعم	Do not know لا أعلم	No لا	Yes نعم	Do not know لا أعلم	Yes نعم	Yes نعم	Do not know لا أعلم	Do not know لا أعلم	Do not know لا أعلم	Do not know لا أعلم
Agree أوافق	Male ذكر	23	Saudi سعودي	جامعه الامام عبد الرحمن	Medicine الطب	4th year السنة الرابعة	3.5-4	It is simulating human attitudes and abilities using computers and technology by teaching machines how humans think, behave, and react toward different situations. هو سلوك وخصائص معينة تتسم بها البرامج الحاسوبية، تجعلها تحاكي القدرات الذهنية البشرية وأنماط عملها.	Academic courses المناهج الدراسية, Broadcast Media (TV, Radio). وسائل الإعلام المرئية (تلفزيون ، راديو), Social Media (Facebook, Instagram, Snapchat, Tweeter,…). وسائل التواصل الاجتماعي, Internet (web pages, online databases,...). الإنترنت (صفحات الويب، قواعد البيانات، ...)	No لا	Yes نعم	Yes نعم	Yes نعم	Yes نعم	No لا	Yes نعم	Do not know لا أعلم	Yes نعم	Yes نعم	Yes نعم	Yes نعم	Yes نعم
Agree أوافق	Female أنثى	19	Saudi سعودي	جامعه الامام عبد الرحمن	Radiology الأشعة	1st year السنة الأولى	3.5-4	It is simulating human attitudes and abilities using computers and technology by teaching machines how humans think, behave, and react toward different situations. هو سلوك وخصائص معينة تتسم بها البرامج الحاسوبية، تجعلها تحاكي القدرات الذهنية البشرية وأنماط عملها.	Print Media (books, magazines, newspapers). وسائل الإعلام المطبوعة (كتب، مجلات، صحف)., Broadcast Media (TV, Radio). وسائل الإعلام المرئية (تلفزيون ، راديو)	No لا	Do not know لا أعلم	Do not know لا أعلم	Do not know لا أعلم	Do not know لا أعلم	Do not know لا أعلم	Yes نعم	Do not know لا أعلم	Do not know لا أعلم	No لا	Yes نعم	Yes نعم	Do not know لا أعلم
Agree أوافق	Female أنثى	32	Saudi سعودي	كليه بدمام	موظفه	موظفه	4-4.5	It is simulating human attitudes and abilities using computers and technology by teaching machines how humans think, behave, and react toward different situations. هو سلوك وخصائص معينة تتسم بها البرامج الحاسوبية، تجعلها تحاكي القدرات الذهنية البشرية وأنماط عملها.	Print Media (books, magazines, newspapers). وسائل الإعلام المطبوعة (كتب، مجلات، صحف)., Broadcast Media (TV, Radio). وسائل الإعلام المرئية (تلفزيون ، راديو), Internet (web pages, online databases,...). الإنترنت (صفحات الويب، قواعد البيانات، ...)	No لا	Yes نعم	Yes نعم	Yes نعم	Do not know لا أعلم	Do not know لا أعلم	Yes نعم	Yes نعم	Yes نعم	No لا	Do not know لا أعلم	Yes نعم	Yes نعم
Agree أوافق	Female أنثى	22	Saudi سعودي	King Saud University, Riyadh. جامعة الملك سعود، الرياض	Pharmacy الصيدلة	4th year السنة الرابعة	>4.5	It is simulating human attitudes and abilities using computers and technology by teaching machines how humans think, behave, and react toward different situations. هو سلوك وخصائص معينة تتسم بها البرامج الحاسوبية، تجعلها تحاكي القدرات الذهنية البشرية وأنماط عملها.	Social Media (Facebook, Instagram, Snapchat, Tweeter,…). وسائل التواصل الاجتماعي, Internet (web pages, online databases,...). الإنترنت (صفحات الويب، قواعد البيانات، ...), Family members. أفراد الأسرة, Friends. أصدقاء	No لا	Yes نعم	Do not know لا أعلم	Yes نعم	No لا	Yes نعم	Yes نعم	Do not know لا أعلم	Yes نعم	Do not know لا أعلم	Do not know لا أعلم	Do not know لا أعلم	Do not know لا أعلم
Agree أوافق	Female أنثى	22	Saudi سعودي	King Saud University, Riyadh. جامعة الملك سعود، الرياض	Pharmacy الصيدلة	4th year السنة الرابعة	>4.5	It is simulating human attitudes and abilities using computers and technology by teaching machines how humans think, behave, and react toward different situations. هو سلوك وخصائص معينة تتسم بها البرامج الحاسوبية، تجعلها تحاكي القدرات الذهنية البشرية وأنماط عملها.	Broadcast Media (TV, Radio). وسائل الإعلام المرئية (تلفزيون ، راديو), Social Media (Facebook, Instagram, Snapchat, Tweeter,…). وسائل التواصل الاجتماعي, Internet (web pages, online databases,...). الإنترنت (صفحات الويب، قواعد البيانات، ...), Family members. أفراد الأسرة, Friends. أصدقاء	No لا	Yes نعم	Yes نعم	Yes نعم	No لا	Yes نعم	Yes نعم	No لا	Yes نعم	Do not know لا أعلم	No لا	No لا	Do not know لا أعلم
Agree أوافق	Male ذكر	20	Saudi سعودي	King Abdulaziz University, Jeddah. جامعة الملك عبد العزيز، جدة	Medicine الطب	3rd year السنة الثالثة	≤3.5	It is simulating human attitudes and abilities using computers and technology by teaching machines how humans think, behave, and react toward different situations. هو سلوك وخصائص معينة تتسم بها البرامج الحاسوبية، تجعلها تحاكي القدرات الذهنية البشرية وأنماط عملها.	Academic courses المناهج الدراسية, Print Media (books, magazines, newspapers). وسائل الإعلام المطبوعة (كتب، مجلات، صحف)., Broadcast Media (TV, Radio). وسائل الإعلام المرئية (تلفزيون ، راديو), Outdoor Media (e.g.Billboards, Transit Ads,..). وسائل الإعلام الخارجية (مثل اللوحات الإعلانية والجدارية،..), Social Media (Facebook, Instagram, Snapchat, Tweeter,…). وسائل التواصل الاجتماعي, Internet (web pa…	No لا	Yes نعم	Yes نعم	Yes نعم	Yes نعم	Yes نعم	Yes نعم	Yes نعم	Yes نعم	Yes نعم	Yes نعم	Yes نعم	Yes نعم
Agree أوافق	Male ذكر	20	Saudi سعودي	King Abdulaziz University, Jeddah. جامعة الملك عبد العزيز، جدة	Medicine الطب	2nd year السنة الثانية	4-4.5	It is a medical dictionary used by healthcare consumers, students, and professionals. إنه قاموس طبي يستخدمه جمهور الرعاية الصحية والطلاب والمهنيون.	Social Media (Facebook, Instagram, Snapchat, Tweeter,…). وسائل التواصل الاجتماعي	Yes- as a personal effort. نعم كرغبة شخصية	Yes نعم	Yes نعم	Yes نعم	Yes نعم	Yes نعم	Yes نعم	Yes نعم	Yes نعم	Do not know لا أعلم	No لا	Yes نعم	No لا
Agree أوافق	Male ذكر	22	Saudi سعودي	King Abdulaziz University, Jeddah. جامعة الملك عبد العزيز، جدة	Medicine الطب	3rd year السنة الثالثة	4-4.5	It is simulating human attitudes and abilities using computers and technology by teaching machines how humans think, behave, and react toward different situations. هو سلوك وخصائص معينة تتسم بها البرامج الحاسوبية، تجعلها تحاكي القدرات الذهنية البشرية وأنماط عملها.	Broadcast Media (TV, Radio). وسائل الإعلام المرئية (تلفزيون ، راديو)	Yes- as a part of university curriculum. نعم كمنهج دراسي في الجامعة	Do not know لا أعلم	Yes نعم	Yes نعم	Yes نعم	No لا	Yes نعم	No لا	Yes نعم	Yes نعم	Yes نعم	No لا	Do not know لا أعلم
Agree أوافق	Female أنثى	22	Saudi سعودي	King Saud University, Riyadh. جامعة الملك سعود، الرياض	Pharmacy الصيدلة	5th year السنة الخامسة	>4.5	It is simulating human attitudes and abilities using computers and technology by teaching machines how humans think, behave, and react toward different situations. هو سلوك وخصائص معينة تتسم بها البرامج الحاسوبية، تجعلها تحاكي القدرات الذهنية البشرية وأنماط عملها.	Broadcast Media (TV, Radio). وسائل الإعلام المرئية (تلفزيون ، راديو), Social Media (Facebook, Instagram, Snapchat, Tweeter,…). وسائل التواصل الاجتماعي, Internet (web pages, online databases,...). الإنترنت (صفحات الويب، قواعد البيانات، ...), Friends. أصدقاء	No لا	Yes نعم	Yes نعم	Yes نعم	Do not know لا أعلم	Yes نعم	Yes نعم	Yes نعم	Yes نعم	No لا	No لا	No لا	Yes نعم
Agree أوافق	Female أنثى	21	Saudi سعودي	King Saud University, Riyadh. جامعة الملك سعود، الرياض	Pharmacy الصيدلة	3rd year السنة الثالثة	>4.5	It is simulating human attitudes and abilities using computers and technology by teaching machines how humans think, behave, and react toward different situations. هو سلوك وخصائص معينة تتسم بها البرامج الحاسوبية، تجعلها تحاكي القدرات الذهنية البشرية وأنماط عملها.	Social Media (Facebook, Instagram, Snapchat, Tweeter,…). وسائل التواصل الاجتماعي, Internet (web pages, online databases,...). الإنترنت (صفحات الويب، قواعد البيانات، ...), Friends. أصدقاء	No لا	Yes نعم	Yes نعم	Yes نعم	Yes نعم	Yes نعم	Yes نعم	Do not know لا أعلم	Yes نعم	Do not know لا أعلم	Do not know لا أعلم	Do not know لا أعلم	Do not know لا أعلم
Agree أوافق	Female أنثى	22	Saudi سعودي	King Saud University, Riyadh. جامعة الملك سعود، الرياض	Pharmacy الصيدلة	4th year السنة الرابعة	>4.5	It is simulating human attitudes and abilities using computers and technology by teaching machines how humans think, behave, and react toward different situations. هو سلوك وخصائص معينة تتسم بها البرامج الحاسوبية، تجعلها تحاكي القدرات الذهنية البشرية وأنماط عملها.	Social Media (Facebook, Instagram, Snapchat, Tweeter,…). وسائل التواصل الاجتماعي, Internet (web pages, online databases,...). الإنترنت (صفحات الويب، قواعد البيانات، ...)	No لا	Yes نعم	Yes نعم	Yes نعم	Do not know لا أعلم	Do not know لا أعلم	Yes نعم	Yes نعم	Yes نعم	No لا	No لا	No لا	Yes نعم
Agree أوافق	Female أنثى	21	Saudi سعودي	King Saud University, Riyadh. جامعة الملك سعود، الرياض	Pharmacy الصيدلة	4th year السنة الرابعة	>4.5	It is simulating human attitudes and abilities using computers and technology by teaching machines how humans think, behave, and react toward different situations. هو سلوك وخصائص معينة تتسم بها البرامج الحاسوبية، تجعلها تحاكي القدرات الذهنية البشرية وأنماط عملها.	Print Media (books, magazines, newspapers). وسائل الإعلام المطبوعة (كتب، مجلات، صحف)., Broadcast Media (TV, Radio). وسائل الإعلام المرئية (تلفزيون ، راديو), Social Media (Facebook, Instagram, Snapchat, Tweeter,…). وسائل التواصل الاجتماعي, Internet (web pages, online databases,...). الإنترنت (صفحات الويب، قواعد البيانات، ...), Family members. أفراد الأسرة, Friends. أصدقاء	No لا	Yes نعم	Yes نعم	Yes نعم	Yes نعم	Yes نعم	Yes نعم	Yes نعم	Yes نعم	Yes نعم	Yes نعم	Yes نعم	Yes نعم
Agree أوافق	Female أنثى	18	Saudi سعودي	King Abdulaziz University, Jeddah. جامعة الملك عبد العزيز، جدة	Medicine الطب	1st year السنة الأولى	>4.5	It is simulating human attitudes and abilities using computers and technology by teaching machines how humans think, behave, and react toward different situations. هو سلوك وخصائص معينة تتسم بها البرامج الحاسوبية، تجعلها تحاكي القدرات الذهنية البشرية وأنماط عملها.	Broadcast Media (TV, Radio). وسائل الإعلام المرئية (تلفزيون ، راديو), Friends. أصدقاء	No لا	Yes نعم	Do not know لا أعلم	Yes نعم	Yes نعم	Yes نعم	Yes نعم	No لا	No لا	Yes نعم	Yes نعم	Yes نعم	Yes نعم
Agree أوافق	Male ذكر	24	Saudi سعودي	King Abdulaziz University, Jeddah. جامعة الملك عبد العزيز، جدة	Medicine الطب	4th year السنة الرابعة	4-4.5	It is simulating human attitudes and abilities using computers and technology by teaching machines how humans think, behave, and react toward different situations. هو سلوك وخصائص معينة تتسم بها البرامج الحاسوبية، تجعلها تحاكي القدرات الذهنية البشرية وأنماط عملها.	Outdoor Media (e.g.Billboards, Transit Ads,..). وسائل الإعلام الخارجية (مثل اللوحات الإعلانية والجدارية،..), Video games. ألعاب الفيديو, Friends. أصدقاء,	Yes- as a personal effort. نعم كرغبة شخصية	Yes نعم	No لا	Yes نعم	Yes نعم	Yes نعم	Yes نعم	No لا	Yes نعم	Do not know لا أعلم	No لا	Yes نعم	Yes نعم
Agree أوافق	Male ذكر	21	Saudi سعودي	King Abdulaziz University, Jeddah. جامعة الملك عبد العزيز، جدة	Medicine الطب	3rd year السنة الثالثة	3.5-4	It is simulating human attitudes and abilities using computers and technology by teaching machines how humans think, behave, and react toward different situations. هو سلوك وخصائص معينة تتسم بها البرامج الحاسوبية، تجعلها تحاكي القدرات الذهنية البشرية وأنماط عملها.	Academic courses المناهج الدراسية	Yes- as a personal effort. نعم كرغبة شخصية	Yes نعم	Yes نعم	Yes نعم	No لا	No لا	Yes نعم	Yes نعم	Yes نعم	Yes نعم	Yes نعم	Yes نعم	Yes نعم
Agree أوافق	Male ذكر	20	Saudi سعودي	King Abdulaziz University, Jeddah. جامعة الملك عبد العزيز، جدة	Medicine الطب	1st year السنة الأولى	4-4.5	It is simulating human attitudes and abilities using computers and technology by teaching machines how humans think, behave, and react toward different situations. هو سلوك وخصائص معينة تتسم بها البرامج الحاسوبية، تجعلها تحاكي القدرات الذهنية البشرية وأنماط عملها.	Print Media (books, magazines, newspapers). وسائل الإعلام المطبوعة (كتب، مجلات، صحف)., Broadcast Media (TV, Radio). وسائل الإعلام المرئية (تلفزيون ، راديو), Outdoor Media (e.g.Billboards, Transit Ads,..). وسائل الإعلام الخارجية (مثل اللوحات الإعلانية والجدارية،..)	Yes- as a personal effort. نعم كرغبة شخصية	Yes نعم	Yes نعم	Yes نعم	Yes نعم	Yes نعم	Yes نعم	Yes نعم	Yes نعم	Yes نعم	Yes نعم	Yes نعم	Yes نعم
Agree أوافق	Male ذكر	26	Saudi سعودي	King Abdulaziz University, Jeddah. جامعة الملك عبد العزيز، جدة	Medicine الطب	intern إنترن	4-4.5	It is simulating human attitudes and abilities using computers and technology by teaching machines how humans think, behave, and react toward different situations. هو سلوك وخصائص معينة تتسم بها البرامج الحاسوبية، تجعلها تحاكي القدرات الذهنية البشرية وأنماط عملها.	Print Media (books, magazines, newspapers). وسائل الإعلام المطبوعة (كتب، مجلات، صحف)., Broadcast Media (TV, Radio). وسائل الإعلام المرئية (تلفزيون ، راديو), Outdoor Media (e.g.Billboards, Transit Ads,..). وسائل الإعلام الخارجية (مثل اللوحات الإعلانية والجدارية،..), Social Media (Facebook, Instagram, Snapchat, Tweeter,…). وسائل التواصل الاجتماعي, Internet (web pages, online databases,...). الإنترن…	Yes- as a personal effort. نعم كرغبة شخصية	Yes نعم	Yes نعم	Yes نعم	Yes نعم	Yes نعم	Yes نعم	Yes نعم	Yes نعم	Yes نعم	Yes نعم	Yes نعم	Yes نعم
Agree أوافق	Male ذكر	21	Saudi سعودي	King Abdulaziz University, Jeddah. جامعة الملك عبد العزيز، جدة	Medicine الطب	3rd year السنة الثالثة	4-4.5	It is simulating human attitudes and abilities using computers and technology by teaching machines how humans think, behave, and react toward different situations. هو سلوك وخصائص معينة تتسم بها البرامج الحاسوبية، تجعلها تحاكي القدرات الذهنية البشرية وأنماط عملها.	Print Media (books, magazines, newspapers). وسائل الإعلام المطبوعة (كتب، مجلات، صحف)., Social Media (Facebook, Instagram, Snapchat, Tweeter,…). وسائل التواصل الاجتماعي, Internet (web pages, online databases,...). الإنترنت (صفحات الويب، قواعد البيانات، ...), Family members. أفراد الأسرة	Yes- as a personal effort. نعم كرغبة شخصية	Yes نعم	Yes نعم	Yes نعم	Yes نعم	Yes نعم	Do not know لا أعلم	Do not know لا أعلم	Yes نعم	Yes نعم	Yes نعم	Yes نعم	Yes نعم
Agree أوافق	Male ذكر	19	Saudi سعودي	King Abdulaziz University, Jeddah. جامعة الملك عبد العزيز، جدة	Medicine الطب	1st year السنة الأولى	4-4.5	It is a medical dictionary used by healthcare consumers, students, and professionals. إنه قاموس طبي يستخدمه جمهور الرعاية الصحية والطلاب والمهنيون.	Broadcast Media (TV, Radio). وسائل الإعلام المرئية (تلفزيون ، راديو), Internet (web pages, online databases,...). الإنترنت (صفحات الويب، قواعد البيانات، ...)	Yes- as a personal effort. نعم كرغبة شخصية	Yes نعم	Yes نعم	Do not know لا أعلم	Yes نعم	Yes نعم	Yes نعم	Yes نعم	Yes نعم	Yes نعم	Yes نعم	Yes نعم	Yes نعم
Agree أوافق	Male ذكر	22	Saudi سعودي	King Abdulaziz University, Jeddah. جامعة الملك عبد العزيز، جدة	Medicine الطب	4th year السنة الرابعة	4-4.5	It is a medical dictionary used by healthcare consumers, students, and professionals. إنه قاموس طبي يستخدمه جمهور الرعاية الصحية والطلاب والمهنيون.	Broadcast Media (TV, Radio). وسائل الإعلام المرئية (تلفزيون ، راديو), Internet (web pages, online databases,...). الإنترنت (صفحات الويب، قواعد البيانات، ...), Family members. أفراد الأسرة	Yes- as a personal effort. نعم كرغبة شخصية	Yes نعم	Yes نعم	Yes نعم	Do not know لا أعلم	Yes نعم	Yes نعم	Yes نعم	Yes نعم	Yes نعم	Yes نعم	Yes نعم	Yes نعم
Agree أوافق	Male ذكر	20	Saudi سعودي	King Abdulaziz University, Jeddah. جامعة الملك عبد العزيز، جدة	Medicine الطب	3rd year السنة الثالثة	>4.5	It is simulating human attitudes and abilities using computers and technology by teaching machines how humans think, behave, and react toward different situations. هو سلوك وخصائص معينة تتسم بها البرامج الحاسوبية، تجعلها تحاكي القدرات الذهنية البشرية وأنماط عملها.	Social Media (Facebook, Instagram, Snapchat, Tweeter,…). وسائل التواصل الاجتماعي, Internet (web pages, online databases,...). الإنترنت (صفحات الويب، قواعد البيانات، ...), Friends. أصدقاء	No لا	Yes نعم	Do not know لا أعلم	Do not know لا أعلم	Yes نعم	No لا	Yes نعم	Do not know لا أعلم	Do not know لا أعلم	Yes نعم	No لا	No لا	Yes نعم
Agree أوافق	Female أنثى	22	Saudi سعودي	King Abdulaziz University, Jeddah. جامعة الملك عبد العزيز، جدة	Medicine الطب	4th year السنة الرابعة	>4.5	It is simulating human attitudes and abilities using computers and technology by teaching machines how humans think, behave, and react toward different situations. هو سلوك وخصائص معينة تتسم بها البرامج الحاسوبية، تجعلها تحاكي القدرات الذهنية البشرية وأنماط عملها.	Print Media (books, magazines, newspapers). وسائل الإعلام المطبوعة (كتب، مجلات، صحف)., Broadcast Media (TV, Radio). وسائل الإعلام المرئية (تلفزيون ، راديو), Outdoor Media (e.g.Billboards, Transit Ads,..). وسائل الإعلام الخارجية (مثل اللوحات الإعلانية والجدارية،..), Social Media (Facebook, Instagram, Snapchat, Tweeter,…). وسائل التواصل الاجتماعي	Yes- as a personal effort. نعم كرغبة شخصية	Yes نعم	Yes نعم	Yes نعم	Yes نعم	Yes نعم	Yes نعم	Yes نعم	Yes نعم	Yes نعم	Yes نعم	Yes نعم	Yes نعم
Agree أوافق	Male ذكر	21	Saudi سعودي	King Abdulaziz University, Jeddah. جامعة الملك عبد العزيز، جدة	Pharmacy الصيدلة	2nd year السنة الثانية	4-4.5	It is a medical dictionary used by healthcare consumers, students, and professionals. إنه قاموس طبي يستخدمه جمهور الرعاية الصحية والطلاب والمهنيون.	Broadcast Media (TV, Radio). وسائل الإعلام المرئية (تلفزيون ، راديو), Outdoor Media (e.g.Billboards, Transit Ads,..). وسائل الإعلام الخارجية (مثل اللوحات الإعلانية والجدارية،..), Video games. ألعاب الفيديو	Yes- as a personal effort. نعم كرغبة شخصية	Yes نعم	Yes نعم	Yes نعم	Yes نعم	Yes نعم	Yes نعم	Yes نعم	Yes نعم	Yes نعم	Yes نعم	Yes نعم	Yes نعم
Agree أوافق	Male ذكر	20	Saudi سعودي	King Abdulaziz University, Jeddah. جامعة الملك عبد العزيز، جدة	Medicine الطب	2nd year السنة الثانية	>4.5	It is simulating human attitudes and abilities using computers and technology by teaching machines how humans think, behave, and react toward different situations. هو سلوك وخصائص معينة تتسم بها البرامج الحاسوبية، تجعلها تحاكي القدرات الذهنية البشرية وأنماط عملها.	Broadcast Media (TV, Radio). وسائل الإعلام المرئية (تلفزيون ، راديو), Social Media (Facebook, Instagram, Snapchat, Tweeter,…). وسائل التواصل الاجتماعي, Internet (web pages, online databases,...). الإنترنت (صفحات الويب، قواعد البيانات، ...), Video games. ألعاب الفيديو, Family members. أفراد الأسرة	No لا	Yes نعم	Yes نعم	Yes نعم	Yes نعم	No لا	Yes نعم	Yes نعم	Yes نعم	Yes نعم	No لا	No لا	No لا
Agree أوافق	Male ذكر	25	Saudi سعودي	King Abdulaziz University, Jeddah. جامعة الملك عبد العزيز، جدة	Medicine الطب	5th year السنة الخامسة	4-4.5	It is simulating human attitudes and abilities using computers and technology by teaching machines how humans think, behave, and react toward different situations. هو سلوك وخصائص معينة تتسم بها البرامج الحاسوبية، تجعلها تحاكي القدرات الذهنية البشرية وأنماط عملها.	Broadcast Media (TV, Radio). وسائل الإعلام المرئية (تلفزيون ، راديو), Outdoor Media (e.g.Billboards, Transit Ads,..). وسائل الإعلام الخارجية (مثل اللوحات الإعلانية والجدارية،..), Social Media (Facebook, Instagram, Snapchat, Tweeter,…). وسائل التواصل الاجتماعي	Yes- as a personal effort. نعم كرغبة شخصية	Yes نعم	Yes نعم	Yes نعم	Yes نعم	Yes نعم	Do not know لا أعلم	Yes نعم	Yes نعم	Yes نعم	Yes نعم	Yes نعم	Yes نعم
Agree أوافق	Female أنثى	21	Saudi سعودي	King Abdulaziz University, Jeddah. جامعة الملك عبد العزيز، جدة	Medicine الطب	2nd year السنة الثانية	4-4.5	It is simulating human attitudes and abilities using computers and technology by teaching machines how humans think, behave, and react toward different situations. هو سلوك وخصائص معينة تتسم بها البرامج الحاسوبية، تجعلها تحاكي القدرات الذهنية البشرية وأنماط عملها.	Broadcast Media (TV, Radio). وسائل الإعلام المرئية (تلفزيون ، راديو), Outdoor Media (e.g.Billboards, Transit Ads,..). وسائل الإعلام الخارجية (مثل اللوحات الإعلانية والجدارية،..), Social Media (Facebook, Instagram, Snapchat, Tweeter,…). وسائل التواصل الاجتماعي, Internet (web pages, online databases,...). الإنترنت (صفحات الويب، قواعد البيانات، ...), Video games. ألعاب الفيديو, Family members. أفراد…	Yes- as a personal effort. نعم كرغبة شخصية	Yes نعم	Yes نعم	Yes نعم	Yes نعم	Yes نعم	Yes نعم	Yes نعم	Yes نعم	Yes نعم	Yes نعم	Yes نعم	Yes نعم
Agree أوافق	Male ذكر	18	Saudi سعودي	King Abdulaziz University, Jeddah. جامعة الملك عبد العزيز، جدة	Medicine الطب	1st year السنة الأولى	4-4.5	It is simulating human attitudes and abilities using computers and technology by teaching machines how humans think, behave, and react toward different situations. هو سلوك وخصائص معينة تتسم بها البرامج الحاسوبية، تجعلها تحاكي القدرات الذهنية البشرية وأنماط عملها.	Broadcast Media (TV, Radio). وسائل الإعلام المرئية (تلفزيون ، راديو), Outdoor Media (e.g.Billboards, Transit Ads,..). وسائل الإعلام الخارجية (مثل اللوحات الإعلانية والجدارية،..), Social Media (Facebook, Instagram, Snapchat, Tweeter,…). وسائل التواصل الاجتماعي, Internet (web pages, online databases,...). الإنترنت (صفحات الويب، قواعد البيانات، ...), Video games. ألعاب الفيديو, Family members. أفراد…	Yes- as a personal effort. نعم كرغبة شخصية	Yes نعم	Yes نعم	Yes نعم	Yes نعم	Yes نعم	Yes نعم	Yes نعم	Yes نعم	Yes نعم	Yes نعم	Yes نعم	Yes نعم
Agree أوافق	Male ذكر	22	Saudi سعودي	King Abdulaziz University, Jeddah. جامعة الملك عبد العزيز، جدة	Medicine الطب	3rd year السنة الثالثة	4-4.5	It is simulating human attitudes and abilities using computers and technology by teaching machines how humans think, behave, and react toward different situations. هو سلوك وخصائص معينة تتسم بها البرامج الحاسوبية، تجعلها تحاكي القدرات الذهنية البشرية وأنماط عملها.	Print Media (books, magazines, newspapers). وسائل الإعلام المطبوعة (كتب، مجلات، صحف)., Outdoor Media (e.g.Billboards, Transit Ads,..). وسائل الإعلام الخارجية (مثل اللوحات الإعلانية والجدارية،..), Internet (web pages, online databases,...). الإنترنت (صفحات الويب، قواعد البيانات، ...)	Yes- as a personal effort. نعم كرغبة شخصية	Yes نعم	Yes نعم	Yes نعم	Yes نعم	Yes نعم	Yes نعم	Yes نعم	Yes نعم	Yes نعم	Yes نعم	Yes نعم	Yes نعم
Agree أوافق	Male ذكر	20	Saudi سعودي	King Abdulaziz University, Jeddah. جامعة الملك عبد العزيز، جدة	Medicine الطب	2nd year السنة الثانية	4-4.5	It is simulating human attitudes and abilities using computers and technology by teaching machines how humans think, behave, and react toward different situations. هو سلوك وخصائص معينة تتسم بها البرامج الحاسوبية، تجعلها تحاكي القدرات الذهنية البشرية وأنماط عملها.	Broadcast Media (TV, Radio). وسائل الإعلام المرئية (تلفزيون ، راديو), Social Media (Facebook, Instagram, Snapchat, Tweeter,…). وسائل التواصل الاجتماعي	Yes- as a personal effort. نعم كرغبة شخصية	Yes نعم	Yes نعم	Yes نعم	Yes نعم	Yes نعم	Do not know لا أعلم	Yes نعم	Yes نعم	Yes نعم	Do not know لا أعلم	Yes نعم	Yes نعم
Agree أوافق	Male ذكر	20	Saudi سعودي	King Abdulaziz University, Jeddah. جامعة الملك عبد العزيز، جدة	Medicine الطب	3rd year السنة الثالثة	4-4.5	It is simulating human attitudes and abilities using computers and technology by teaching machines how humans think, behave, and react toward different situations. هو سلوك وخصائص معينة تتسم بها البرامج الحاسوبية، تجعلها تحاكي القدرات الذهنية البشرية وأنماط عملها.	Print Media (books, magazines, newspapers). وسائل الإعلام المطبوعة (كتب، مجلات، صحف)., Broadcast Media (TV, Radio). وسائل الإعلام المرئية (تلفزيون ، راديو)	No لا	Do not know لا أعلم	Yes نعم	Yes نعم	No لا	Yes نعم	No لا	Yes نعم	No لا	Yes نعم	No لا	Yes نعم	Yes نعم
Agree أوافق	Male ذكر	23	Saudi سعودي	King Abdulaziz University, Jeddah. جامعة الملك عبد العزيز، جدة	Medicine الطب	2nd year السنة الثانية	3.5-4	It is simulating human attitudes and abilities using computers and technology by teaching machines how humans think, behave, and react toward different situations. هو سلوك وخصائص معينة تتسم بها البرامج الحاسوبية، تجعلها تحاكي القدرات الذهنية البشرية وأنماط عملها.	Broadcast Media (TV, Radio). وسائل الإعلام المرئية (تلفزيون ، راديو), Outdoor Media (e.g.Billboards, Transit Ads,..). وسائل الإعلام الخارجية (مثل اللوحات الإعلانية والجدارية،..), Social Media (Facebook, Instagram, Snapchat, Tweeter,…). وسائل التواصل الاجتماعي, Internet (web pages, online databases,...). الإنترنت (صفحات الويب، قواعد البيانات، ...)	Yes- as a personal effort. نعم كرغبة شخصية	Yes نعم	Yes نعم	Yes نعم	Do not know لا أعلم	Yes نعم	Yes نعم	Yes نعم	Yes نعم	Yes نعم	Yes نعم	Yes نعم	Do not know لا أعلم
Agree أوافق	Male ذكر	25	Saudi سعودي	King Abdulaziz University, Jeddah. جامعة الملك عبد العزيز، جدة	Medicine الطب	5th year السنة الخامسة	4-4.5	It is simulating human attitudes and abilities using computers and technology by teaching machines how humans think, behave, and react toward different situations. هو سلوك وخصائص معينة تتسم بها البرامج الحاسوبية، تجعلها تحاكي القدرات الذهنية البشرية وأنماط عملها.	Broadcast Media (TV, Radio). وسائل الإعلام المرئية (تلفزيون ، راديو), Social Media (Facebook, Instagram, Snapchat, Tweeter,…). وسائل التواصل الاجتماعي, Internet (web pages, online databases,...). الإنترنت (صفحات الويب، قواعد البيانات، ...), Family members. أفراد الأسرة	Yes- as a personal effort. نعم كرغبة شخصية	Yes نعم	Yes نعم	Yes نعم	Yes نعم	Yes نعم	Yes نعم	Yes نعم	Yes نعم	Yes نعم	Yes نعم	Yes نعم	Yes نعم
Agree أوافق	Female أنثى	19	Saudi سعودي	King Abdulaziz University, Jeddah. جامعة الملك عبد العزيز، جدة	Medicine الطب	1st year السنة الأولى	>4.5	It is simulating human attitudes and abilities using computers and technology by teaching machines how humans think, behave, and react toward different situations. هو سلوك وخصائص معينة تتسم بها البرامج الحاسوبية، تجعلها تحاكي القدرات الذهنية البشرية وأنماط عملها.	Outdoor Media (e.g.Billboards, Transit Ads,..). وسائل الإعلام الخارجية (مثل اللوحات الإعلانية والجدارية،..), Social Media (Facebook, Instagram, Snapchat, Tweeter,…). وسائل التواصل الاجتماعي, Internet (web pages, online databases,...). الإنترنت (صفحات الويب، قواعد البيانات، ...), Video games. ألعاب الفيديو, Family members. أفراد الأسرة, Friends. أصدقاء	Yes- as a personal effort. نعم كرغبة شخصية	Yes نعم	Yes نعم	Yes نعم	Yes نعم	Yes نعم	Yes نعم	Yes نعم	Yes نعم	Yes نعم	Do not know لا أعلم	Yes نعم	Yes نعم
Agree أوافق	Male ذكر	23	Saudi سعودي	King Abdulaziz University, Jeddah. جامعة الملك عبد العزيز، جدة	Medicine الطب	2nd year السنة الثانية	4-4.5	It is simulating human attitudes and abilities using computers and technology by teaching machines how humans think, behave, and react toward different situations. هو سلوك وخصائص معينة تتسم بها البرامج الحاسوبية، تجعلها تحاكي القدرات الذهنية البشرية وأنماط عملها.	Outdoor Media (e.g.Billboards, Transit Ads,..). وسائل الإعلام الخارجية (مثل اللوحات الإعلانية والجدارية،..), Social Media (Facebook, Instagram, Snapchat, Tweeter,…). وسائل التواصل الاجتماعي, Internet (web pages, online databases,...). الإنترنت (صفحات الويب، قواعد البيانات، ...), Friends. أصدقاء	Yes- as a personal effort. نعم كرغبة شخصية	Yes نعم	Yes نعم	Yes نعم	Do not know لا أعلم	Yes نعم	Yes نعم	Yes نعم	Yes نعم	Yes نعم	Yes نعم	Yes نعم	Yes نعم
Agree أوافق	Male ذكر	24	Saudi سعودي	King Abdulaziz University, Jeddah. جامعة الملك عبد العزيز، جدة	Medicine الطب	2nd year السنة الثانية	4-4.5	It is simulating human attitudes and abilities using computers and technology by teaching machines how humans think, behave, and react toward different situations. هو سلوك وخصائص معينة تتسم بها البرامج الحاسوبية، تجعلها تحاكي القدرات الذهنية البشرية وأنماط عملها.	Print Media (books, magazines, newspapers). وسائل الإعلام المطبوعة (كتب، مجلات، صحف)., Broadcast Media (TV, Radio). وسائل الإعلام المرئية (تلفزيون ، راديو), Outdoor Media (e.g.Billboards, Transit Ads,..). وسائل الإعلام الخارجية (مثل اللوحات الإعلانية والجدارية،..), Social Media (Facebook, Instagram, Snapchat, Tweeter,…). وسائل التواصل الاجتماعي, Friends. أصدقاء	Yes- as a personal effort. نعم كرغبة شخصية	Yes نعم	Yes نعم	Yes نعم	Yes نعم	Yes نعم	Yes نعم	Yes نعم	Yes نعم	Yes نعم	No لا	Yes نعم	Yes نعم
Agree أوافق	Female أنثى	21	Saudi سعودي	King Abdulaziz University, Jeddah. جامعة الملك عبد العزيز، جدة	Medicine الطب	3rd year السنة الثالثة	>4.5	It is simulating human attitudes and abilities using computers and technology by teaching machines how humans think, behave, and react toward different situations. هو سلوك وخصائص معينة تتسم بها البرامج الحاسوبية، تجعلها تحاكي القدرات الذهنية البشرية وأنماط عملها.	Print Media (books, magazines, newspapers). وسائل الإعلام المطبوعة (كتب، مجلات، صحف)., Broadcast Media (TV, Radio). وسائل الإعلام المرئية (تلفزيون ، راديو), Outdoor Media (e.g.Billboards, Transit Ads,..). وسائل الإعلام الخارجية (مثل اللوحات الإعلانية والجدارية،..), Social Media (Facebook, Instagram, Snapchat, Tweeter,…). وسائل التواصل الاجتماعي, Internet (web pages, online databases,...). الإنترن…	Yes- as a personal effort. نعم كرغبة شخصية	Yes نعم	Yes نعم	Yes نعم	Yes نعم	Yes نعم	Yes نعم	Yes نعم	Yes نعم	Yes نعم	Yes نعم	Yes نعم	Yes نعم
Agree أوافق	Male ذكر	18	Saudi سعودي	King Abdulaziz University, Jeddah. جامعة الملك عبد العزيز، جدة	Medicine الطب	1st year السنة الأولى	4-4.5	It is simulating human attitudes and abilities using computers and technology by teaching machines how humans think, behave, and react toward different situations. هو سلوك وخصائص معينة تتسم بها البرامج الحاسوبية، تجعلها تحاكي القدرات الذهنية البشرية وأنماط عملها.	Print Media (books, magazines, newspapers). وسائل الإعلام المطبوعة (كتب، مجلات، صحف)., Broadcast Media (TV, Radio). وسائل الإعلام المرئية (تلفزيون ، راديو), Outdoor Media (e.g.Billboards, Transit Ads,..). وسائل الإعلام الخارجية (مثل اللوحات الإعلانية والجدارية،..), Social Media (Facebook, Instagram, Snapchat, Tweeter,…). وسائل التواصل الاجتماعي	Yes- as a personal effort. نعم كرغبة شخصية	Yes نعم	Yes نعم	Yes نعم	Yes نعم	Do not know لا أعلم	Yes نعم	Yes نعم	Yes نعم	Yes نعم	No لا	Yes نعم	Yes نعم
Agree أوافق	Male ذكر	22	Saudi سعودي	King Abdulaziz University, Jeddah. جامعة الملك عبد العزيز، جدة	Medicine الطب	3rd year السنة الثالثة	3.5-4	It is simulating human attitudes and abilities using computers and technology by teaching machines how humans think, behave, and react toward different situations. هو سلوك وخصائص معينة تتسم بها البرامج الحاسوبية، تجعلها تحاكي القدرات الذهنية البشرية وأنماط عملها.	Print Media (books, magazines, newspapers). وسائل الإعلام المطبوعة (كتب، مجلات، صحف)., Broadcast Media (TV, Radio). وسائل الإعلام المرئية (تلفزيون ، راديو), Family members. أفراد الأسرة	Yes- as a personal effort. نعم كرغبة شخصية	Yes نعم	Yes نعم	Yes نعم	Yes نعم	Yes نعم	Yes نعم	Yes نعم	Yes نعم	Yes نعم	Yes نعم	Yes نعم	Yes نعم
Agree أوافق	Male ذكر	19	Saudi سعودي	King Abdulaziz University, Jeddah. جامعة الملك عبد العزيز، جدة	Medicine الطب	1st year السنة الأولى	>4.5	It is simulating human attitudes and abilities using computers and technology by teaching machines how humans think, behave, and react toward different situations. هو سلوك وخصائص معينة تتسم بها البرامج الحاسوبية، تجعلها تحاكي القدرات الذهنية البشرية وأنماط عملها.	Broadcast Media (TV, Radio). وسائل الإعلام المرئية (تلفزيون ، راديو), Social Media (Facebook, Instagram, Snapchat, Tweeter,…). وسائل التواصل الاجتماعي, Video games. ألعاب الفيديو, Family members. أفراد الأسرة, Friends. أصدقاء	Yes- as a personal effort. نعم كرغبة شخصية	Yes نعم	Yes نعم	Yes نعم	Yes نعم	Yes نعم	Do not know لا أعلم	Yes نعم	Do not know لا أعلم	Do not know لا أعلم	Do not know لا أعلم	Yes نعم	Yes نعم
Agree أوافق	Female أنثى	37	Saudi سعودي	King Abdulaziz University, Jeddah. جامعة الملك عبد العزيز، جدة	خريجة كيمياء حيوية	Postgraduate (e.g. MSc. or PhD) دراسات عليا (ماجستير أو دكتوراه)	3.5-4	It is simulating human attitudes and abilities using computers and technology by teaching machines how humans think, behave, and react toward different situations. هو سلوك وخصائص معينة تتسم بها البرامج الحاسوبية، تجعلها تحاكي القدرات الذهنية البشرية وأنماط عملها.	Social Media (Facebook, Instagram, Snapchat, Tweeter,…). وسائل التواصل الاجتماعي	Yes- as a personal effort. نعم كرغبة شخصية	Yes نعم	Yes نعم	Yes نعم	Yes نعم	Yes نعم	Yes نعم	Yes نعم	Yes نعم	No لا	Do not know لا أعلم	Do not know لا أعلم	Yes نعم
Agree أوافق	Female أنثى	20	Saudi سعودي	Batterjee Medical College, Jeddah. كلية البترجي الطبية، جدة	Pharmacy الصيدلة	1st year السنة الأولى	≤3.5	It is simulating human attitudes and abilities using computers and technology by teaching machines how humans think, behave, and react toward different situations. هو سلوك وخصائص معينة تتسم بها البرامج الحاسوبية، تجعلها تحاكي القدرات الذهنية البشرية وأنماط عملها.	Academic courses المناهج الدراسية, Print Media (books, magazines, newspapers). وسائل الإعلام المطبوعة (كتب، مجلات، صحف)., Social Media (Facebook, Instagram, Snapchat, Tweeter,…). وسائل التواصل الاجتماعي, Internet (web pages, online databases,...). الإنترنت (صفحات الويب، قواعد البيانات، ...)	No لا	Yes نعم	Do not know لا أعلم	Yes نعم	No لا	Do not know لا أعلم	Yes نعم	Yes نعم	Yes نعم	No لا	No لا	Do not know لا أعلم	Do not know لا أعلم
Agree أوافق	Male ذكر	20	Saudi سعودي	King Abdulaziz University, Jeddah. جامعة الملك عبد العزيز، جدة	Medicine الطب	3rd year السنة الثالثة	4-4.5	It is simulating human attitudes and abilities using computers and technology by teaching machines how humans think, behave, and react toward different situations. هو سلوك وخصائص معينة تتسم بها البرامج الحاسوبية، تجعلها تحاكي القدرات الذهنية البشرية وأنماط عملها.	Broadcast Media (TV, Radio). وسائل الإعلام المرئية (تلفزيون ، راديو), Social Media (Facebook, Instagram, Snapchat, Tweeter,…). وسائل التواصل الاجتماعي, Internet (web pages, online databases,...). الإنترنت (صفحات الويب، قواعد البيانات، ...), Friends. أصدقاء	No لا	Yes نعم	Yes نعم	No لا	No لا	Yes نعم	No لا	No لا	Yes نعم	No لا	Yes نعم	No لا	Yes نعم
Agree أوافق	Male ذكر	21	Saudi سعودي	King Abdulaziz University, Jeddah. جامعة الملك عبد العزيز، جدة	Medicine الطب	2nd year السنة الثانية	3.5-4	It is simulating human attitudes and abilities using computers and technology by teaching machines how humans think, behave, and react toward different situations. هو سلوك وخصائص معينة تتسم بها البرامج الحاسوبية، تجعلها تحاكي القدرات الذهنية البشرية وأنماط عملها.	Print Media (books, magazines, newspapers). وسائل الإعلام المطبوعة (كتب، مجلات، صحف)., Outdoor Media (e.g.Billboards, Transit Ads,..). وسائل الإعلام الخارجية (مثل اللوحات الإعلانية والجدارية،..), Internet (web pages, online databases,...). الإنترنت (صفحات الويب، قواعد البيانات، ...)	Yes- as a personal effort. نعم كرغبة شخصية	Yes نعم	Yes نعم	Yes نعم	Yes نعم	Yes نعم	Yes نعم	Do not know لا أعلم	Yes نعم	Yes نعم	Yes نعم	Yes نعم	Yes نعم
Agree أوافق	Male ذكر	22	Saudi سعودي	King Abdulaziz University, Jeddah. جامعة الملك عبد العزيز، جدة	Medicine الطب	3rd year السنة الثالثة	3.5-4	It is simulating human attitudes and abilities using computers and technology by teaching machines how humans think, behave, and react toward different situations. هو سلوك وخصائص معينة تتسم بها البرامج الحاسوبية، تجعلها تحاكي القدرات الذهنية البشرية وأنماط عملها.	Academic courses المناهج الدراسية, Print Media (books, magazines, newspapers). وسائل الإعلام المطبوعة (كتب، مجلات، صحف)., Outdoor Media (e.g.Billboards, Transit Ads,..). وسائل الإعلام الخارجية (مثل اللوحات الإعلانية والجدارية،..), Family members. أفراد الأسرة	Yes- as a personal effort. نعم كرغبة شخصية	Yes نعم	Yes نعم	Yes نعم	Yes نعم	Yes نعم	Yes نعم	Yes نعم	Yes نعم	Yes نعم	Yes نعم	Yes نعم	Yes نعم
Agree أوافق	Male ذكر	22	Saudi سعودي	جامعة الملك سعود للعلوم الصحيه بجدة	Occupational Therapy العلاج الوظيفي	4th year السنة الرابعة	4-4.5	It is simulating human attitudes and abilities using computers and technology by teaching machines how humans think, behave, and react toward different situations. هو سلوك وخصائص معينة تتسم بها البرامج الحاسوبية، تجعلها تحاكي القدرات الذهنية البشرية وأنماط عملها.	Broadcast Media (TV, Radio). وسائل الإعلام المرئية (تلفزيون ، راديو), Video games. ألعاب الفيديو, Family members. أفراد الأسرة	Yes- as a personal effort. نعم كرغبة شخصية	Yes نعم	Yes نعم	Yes نعم	No لا	Yes نعم	Yes نعم	No لا	Yes نعم	Yes نعم	Yes نعم	No لا	Yes نعم
Agree أوافق	Male ذكر	21	Saudi سعودي	جامعة الملك سعود للعلوم الصحية بجدة	Occupational Therapy العلاج الوظيفي	3rd year السنة الثالثة	3.5-4	It is simulating human attitudes and abilities using computers and technology by teaching machines how humans think, behave, and react toward different situations. هو سلوك وخصائص معينة تتسم بها البرامج الحاسوبية، تجعلها تحاكي القدرات الذهنية البشرية وأنماط عملها.	Academic courses المناهج الدراسية, Print Media (books, magazines, newspapers). وسائل الإعلام المطبوعة (كتب، مجلات، صحف)., Outdoor Media (e.g.Billboards, Transit Ads,..). وسائل الإعلام الخارجية (مثل اللوحات الإعلانية والجدارية،..), Internet (web pages, online databases,...). الإنترنت (صفحات الويب، قواعد البيانات، ...), Video games. ألعاب الفيديو	No لا	Yes نعم	Yes نعم	Yes نعم	Yes نعم	Yes نعم	Yes نعم	Do not know لا أعلم	Yes نعم	Yes نعم	Do not know لا أعلم	Do not know لا أعلم	Do not know لا أعلم
Agree أوافق	Female أنثى	20	Saudi سعودي	KSAU-HS الحرس	Occupational Therapy العلاج الوظيفي	3rd year السنة الثالثة	>4.5	It is simulating human attitudes and abilities using computers and technology by teaching machines how humans think, behave, and react toward different situations. هو سلوك وخصائص معينة تتسم بها البرامج الحاسوبية، تجعلها تحاكي القدرات الذهنية البشرية وأنماط عملها.	Academic courses المناهج الدراسية, Social Media (Facebook, Instagram, Snapchat, Tweeter,…). وسائل التواصل الاجتماعي, Internet (web pages, online databases,...). الإنترنت (صفحات الويب، قواعد البيانات، ...), Friends. أصدقاء	No لا	Yes نعم	Yes نعم	Yes نعم	Yes نعم	Do not know لا أعلم	Yes نعم	Yes نعم	Yes نعم	No لا	No لا	No لا	No لا
Agree أوافق	Male ذكر	22	Saudi سعودي	جامعه الملك سعود للعلوم الصحيه	Occupational Therapy العلاج الوظيفي	3rd year السنة الثالثة	≤3.5	It is simulating human attitudes and abilities using computers and technology by teaching machines how humans think, behave, and react toward different situations. هو سلوك وخصائص معينة تتسم بها البرامج الحاسوبية، تجعلها تحاكي القدرات الذهنية البشرية وأنماط عملها.	Academic courses المناهج الدراسية, Print Media (books, magazines, newspapers). وسائل الإعلام المطبوعة (كتب، مجلات، صحف)., Social Media (Facebook, Instagram, Snapchat, Tweeter,…). وسائل التواصل الاجتماعي	Yes- as a personal effort. نعم كرغبة شخصية	Yes نعم	Yes نعم	Yes نعم	No لا	Yes نعم	Yes نعم	Yes نعم	Yes نعم	Yes نعم	No لا	No لا	Yes نعم
Agree أوافق	Male ذكر	21	Saudi سعودي	جامعة الملك سعود للعلوم الصحية	Occupational Therapy العلاج الوظيفي	3rd year السنة الثالثة	3.5-4	It is simulating human attitudes and abilities using computers and technology by teaching machines how humans think, behave, and react toward different situations. هو سلوك وخصائص معينة تتسم بها البرامج الحاسوبية، تجعلها تحاكي القدرات الذهنية البشرية وأنماط عملها.	Social Media (Facebook, Instagram, Snapchat, Tweeter,…). وسائل التواصل الاجتماعي, Internet (web pages, online databases,...). الإنترنت (صفحات الويب، قواعد البيانات، ...)	No لا	Do not know لا أعلم	Yes نعم	Do not know لا أعلم	Do not know لا أعلم	Yes نعم	Do not know لا أعلم	No لا	Yes نعم	Yes نعم	No لا	Do not know لا أعلم	Do not know لا أعلم
Agree أوافق	Male ذكر	19	Saudi سعودي	جامعة الملك سعود للعلوم الصحية بجدة	Respiratory Therapy العلاج التنفسي	3rd year السنة الثالثة	>4.5	It is simulating human attitudes and abilities using computers and technology by teaching machines how humans think, behave, and react toward different situations. هو سلوك وخصائص معينة تتسم بها البرامج الحاسوبية، تجعلها تحاكي القدرات الذهنية البشرية وأنماط عملها.	Academic courses المناهج الدراسية, Broadcast Media (TV, Radio). وسائل الإعلام المرئية (تلفزيون ، راديو), Social Media (Facebook, Instagram, Snapchat, Tweeter,…). وسائل التواصل الاجتماعي, Internet (web pages, online databases,...). الإنترنت (صفحات الويب، قواعد البيانات، ...), Video games. ألعاب الفيديو	No لا	Yes نعم	Yes نعم	No لا	Yes نعم	Yes نعم	Yes نعم	Yes نعم	Yes نعم	No لا	Yes نعم	No لا	Yes نعم
Agree أوافق	Male ذكر	20	Saudi سعودي	جامعة الملك سغود بن عبدالعزيز للعلوم الصحية الحرس الوطني	Respiratory Therapy العلاج التنفسي	3rd year السنة الثالثة	3.5-4	It is simulating human attitudes and abilities using computers and technology by teaching machines how humans think, behave, and react toward different situations. هو سلوك وخصائص معينة تتسم بها البرامج الحاسوبية، تجعلها تحاكي القدرات الذهنية البشرية وأنماط عملها.	Social Media (Facebook, Instagram, Snapchat, Tweeter,…). وسائل التواصل الاجتماعي, Internet (web pages, online databases,...). الإنترنت (صفحات الويب، قواعد البيانات، ...), Family members. أفراد الأسرة, Friends. أصدقاء	Yes- as a part of university curriculum. نعم كمنهج دراسي في الجامعة	Yes نعم	Yes نعم	Yes نعم	No لا	Do not know لا أعلم	Yes نعم	No لا	No لا	No لا	Do not know لا أعلم	Do not know لا أعلم	Do not know لا أعلم
Agree أوافق	Male ذكر	20	Saudi سعودي	جامعة الملك سعود بن عبدالعزيز للعلوم الصحية	Respiratory Therapy العلاج التنفسي	3rd year السنة الثالثة	4-4.5	It is simulating human attitudes and abilities using computers and technology by teaching machines how humans think, behave, and react toward different situations. هو سلوك وخصائص معينة تتسم بها البرامج الحاسوبية، تجعلها تحاكي القدرات الذهنية البشرية وأنماط عملها.	Social Media (Facebook, Instagram, Snapchat, Tweeter,…). وسائل التواصل الاجتماعي, Friends. أصدقاء	No لا	Yes نعم	Yes نعم	Yes نعم	Yes نعم	Yes نعم	Do not know لا أعلم	No لا	Yes نعم	No لا	No لا	Yes نعم	No لا
Agree أوافق	Male ذكر	21	Saudi سعودي	جامعة الملك سعود في جدة	Respiratory Therapy العلاج التنفسي	3rd year السنة الثالثة	>4.5	It is simulating human attitudes and abilities using computers and technology by teaching machines how humans think, behave, and react toward different situations. هو سلوك وخصائص معينة تتسم بها البرامج الحاسوبية، تجعلها تحاكي القدرات الذهنية البشرية وأنماط عملها.	Academic courses المناهج الدراسية, Print Media (books, magazines, newspapers). وسائل الإعلام المطبوعة (كتب، مجلات، صحف)., Broadcast Media (TV, Radio). وسائل الإعلام المرئية (تلفزيون ، راديو), Outdoor Media (e.g.Billboards, Transit Ads,..). وسائل الإعلام الخارجية (مثل اللوحات الإعلانية والجدارية،..), Social Media (Facebook, Instagram, Snapchat, Tweeter,…). وسائل التواصل الاجتماعي	No لا	Yes نعم	Yes نعم	Yes نعم	Yes نعم	Yes نعم	Yes نعم	Yes نعم	Yes نعم	No لا	No لا	No لا	Yes نعم
Agree أوافق	Female أنثى	18	Saudi سعودي	Batterjee Medical College, Jeddah. كلية البترجي الطبية، جدة	Preparatory Year السنة التحضيرية	Preparatory Year السنة التحضيرية	≤3.5	It is simulating human attitudes and abilities using computers and technology by teaching machines how humans think, behave, and react toward different situations. هو سلوك وخصائص معينة تتسم بها البرامج الحاسوبية، تجعلها تحاكي القدرات الذهنية البشرية وأنماط عملها.	Academic courses المناهج الدراسية, Broadcast Media (TV, Radio). وسائل الإعلام المرئية (تلفزيون ، راديو), Social Media (Facebook, Instagram, Snapchat, Tweeter,…). وسائل التواصل الاجتماعي, Internet (web pages, online databases,...). الإنترنت (صفحات الويب، قواعد البيانات، ...), Video games. ألعاب الفيديو	No لا	Yes نعم	Do not know لا أعلم	No لا	Do not know لا أعلم	Do not know لا أعلم	Yes نعم	No لا	Yes نعم	Yes نعم	Yes نعم	Do not know لا أعلم	Yes نعم
Agree أوافق	Female أنثى	19	Saudi سعودي	Umm Al Qura University, Makkah. جامعة أم القرى، مكة	طب المختبرات	2nd year السنة الثانية	>4.5	It is simulating human attitudes and abilities using computers and technology by teaching machines how humans think, behave, and react toward different situations. هو سلوك وخصائص معينة تتسم بها البرامج الحاسوبية، تجعلها تحاكي القدرات الذهنية البشرية وأنماط عملها.	Academic courses المناهج الدراسية, Social Media (Facebook, Instagram, Snapchat, Tweeter,…). وسائل التواصل الاجتماعي, Internet (web pages, online databases,...). الإنترنت (صفحات الويب، قواعد البيانات، ...)	No لا	Yes نعم	Do not know لا أعلم	No لا	Yes نعم	Yes نعم	Yes نعم	Yes نعم	No لا	Yes نعم	Yes نعم	Yes نعم	Yes نعم
Agree أوافق	Female أنثى	21	Saudi سعودي	Batterjee Medical College, Jeddah. كلية البترجي الطبية، جدة	Preparatory Year السنة التحضيرية	Preparatory Year السنة التحضيرية	≤3.5	It is simulating human attitudes and abilities using computers and technology by teaching machines how humans think, behave, and react toward different situations. هو سلوك وخصائص معينة تتسم بها البرامج الحاسوبية، تجعلها تحاكي القدرات الذهنية البشرية وأنماط عملها.	Academic courses المناهج الدراسية, Broadcast Media (TV, Radio). وسائل الإعلام المرئية (تلفزيون ، راديو), Social Media (Facebook, Instagram, Snapchat, Tweeter,…). وسائل التواصل الاجتماعي, Video games. ألعاب الفيديو	Yes- as a part of university curriculum. نعم كمنهج دراسي في الجامعة	Yes نعم	Do not know لا أعلم	No لا	Yes نعم	Yes نعم	Do not know لا أعلم	No لا	No لا	Yes نعم	No لا	Yes نعم	Yes نعم
Agree أوافق	Female أنثى	24	Saudi سعودي	Batterjee Medical College, Jeddah. كلية البترجي الطبية، جدة	Preparatory Year السنة التحضيرية	Preparatory Year السنة التحضيرية	3.5-4	It is simulating human attitudes and abilities using computers and technology by teaching machines how humans think, behave, and react toward different situations. هو سلوك وخصائص معينة تتسم بها البرامج الحاسوبية، تجعلها تحاكي القدرات الذهنية البشرية وأنماط عملها.	Academic courses المناهج الدراسية, Social Media (Facebook, Instagram, Snapchat, Tweeter,…). وسائل التواصل الاجتماعي, Internet (web pages, online databases,...). الإنترنت (صفحات الويب، قواعد البيانات، ...), Video games. ألعاب الفيديو	Yes- as a part of university curriculum. نعم كمنهج دراسي في الجامعة	Yes نعم	Yes نعم	Yes نعم	Yes نعم	Yes نعم	Yes نعم	Yes نعم	Yes نعم	Yes نعم	Yes نعم	Yes نعم	Yes نعم
Agree أوافق	Female أنثى	20	Saudi سعودي	King Abdulaziz University, Jeddah. جامعة الملك عبد العزيز، جدة	Radiology الأشعة	1st year السنة الأولى	3.5-4	It is simulating human attitudes and abilities using computers and technology by teaching machines how humans think, behave, and react toward different situations. هو سلوك وخصائص معينة تتسم بها البرامج الحاسوبية، تجعلها تحاكي القدرات الذهنية البشرية وأنماط عملها.	Social Media (Facebook, Instagram, Snapchat, Tweeter,…). وسائل التواصل الاجتماعي	No لا	Yes نعم	Yes نعم	Yes نعم	Yes نعم	Yes نعم	Yes نعم	Yes نعم	Yes نعم	No لا	No لا	No لا	No لا
Agree أوافق	Female أنثى	20	Non-Saudi غير سعودي	Batterjee Medical College, Jeddah. كلية البترجي الطبية، جدة	Medicine الطب	1st year السنة الأولى	4-4.5	It is simulating human attitudes and abilities using computers and technology by teaching machines how humans think, behave, and react toward different situations. هو سلوك وخصائص معينة تتسم بها البرامج الحاسوبية، تجعلها تحاكي القدرات الذهنية البشرية وأنماط عملها.	Broadcast Media (TV, Radio). وسائل الإعلام المرئية (تلفزيون ، راديو), Social Media (Facebook, Instagram, Snapchat, Tweeter,…). وسائل التواصل الاجتماعي, Internet (web pages, online databases,...). الإنترنت (صفحات الويب، قواعد البيانات، ...)	No لا	Yes نعم	Yes نعم	Do not know لا أعلم	Yes نعم	Do not know لا أعلم	Yes نعم	Yes نعم	Yes نعم	No لا	Do not know لا أعلم	Do not know لا أعلم	Do not know لا أعلم
Agree أوافق	Male ذكر	21	Saudi سعودي	ام القرى	Medicine الطب	4th year السنة الرابعة	>4.5	It is simulating human attitudes and abilities using computers and technology by teaching machines how humans think, behave, and react toward different situations. هو سلوك وخصائص معينة تتسم بها البرامج الحاسوبية، تجعلها تحاكي القدرات الذهنية البشرية وأنماط عملها.	Broadcast Media (TV, Radio). وسائل الإعلام المرئية (تلفزيون ، راديو), Social Media (Facebook, Instagram, Snapchat, Tweeter,…). وسائل التواصل الاجتماعي, Internet (web pages, online databases,...). الإنترنت (صفحات الويب، قواعد البيانات، ...)	No لا	Yes نعم	Yes نعم	Yes نعم	Yes نعم	Yes نعم	Yes نعم	Yes نعم	Yes نعم	No لا	No لا	No لا	No لا
Agree أوافق	Male ذكر	22	Saudi سعودي	Umm Al Qura University, Makkah. جامعة أم القرى، مكة	Medicine الطب	4th year السنة الرابعة	>4.5	It is a medical dictionary used by healthcare consumers, students, and professionals. إنه قاموس طبي يستخدمه جمهور الرعاية الصحية والطلاب والمهنيون.	Broadcast Media (TV, Radio). وسائل الإعلام المرئية (تلفزيون ، راديو), Outdoor Media (e.g.Billboards, Transit Ads,..). وسائل الإعلام الخارجية (مثل اللوحات الإعلانية والجدارية،..)	Yes- as a personal effort. نعم كرغبة شخصية	Yes نعم	Do not know لا أعلم	No لا	Yes نعم	Do not know لا أعلم	No لا	Do not know لا أعلم	Yes نعم	No لا	No لا	No لا	Do not know لا أعلم
Agree أوافق	Male ذكر	25	Saudi سعودي	Batterjee Medical College, Jeddah. كلية البترجي الطبية، جدة	Preparatory Year السنة التحضيرية	Preparatory Year السنة التحضيرية	4-4.5	It is simulating human attitudes and abilities using computers and technology by teaching machines how humans think, behave, and react toward different situations. هو سلوك وخصائص معينة تتسم بها البرامج الحاسوبية، تجعلها تحاكي القدرات الذهنية البشرية وأنماط عملها.	Video games. ألعاب الفيديو	Yes- as a part of university curriculum. نعم كمنهج دراسي في الجامعة	No لا	Do not know لا أعلم	No لا	No لا	No لا	Do not know لا أعلم	No لا	No لا	Yes نعم	Yes نعم	Yes نعم	Do not know لا أعلم
Agree أوافق	Female أنثى	19	Saudi سعودي	Batterjee Medical College, Jeddah. كلية البترجي الطبية، جدة	Preparatory Year السنة التحضيرية	Preparatory Year السنة التحضيرية	4-4.5	It is simulating human attitudes and abilities using computers and technology by teaching machines how humans think, behave, and react toward different situations. هو سلوك وخصائص معينة تتسم بها البرامج الحاسوبية، تجعلها تحاكي القدرات الذهنية البشرية وأنماط عملها.	Academic courses المناهج الدراسية, Broadcast Media (TV, Radio). وسائل الإعلام المرئية (تلفزيون ، راديو), Social Media (Facebook, Instagram, Snapchat, Tweeter,…). وسائل التواصل الاجتماعي, Internet (web pages, online databases,...). الإنترنت (صفحات الويب، قواعد البيانات، ...), Video games. ألعاب الفيديو, Family members. أفراد الأسرة, Friends. أصدقاء	Yes- as a part of university curriculum. نعم كمنهج دراسي في الجامعة	Yes نعم	Yes نعم	No لا	Yes نعم	Do not know لا أعلم	Yes نعم	No لا	Yes نعم	Yes نعم	Yes نعم	Do not know لا أعلم	Do not know لا أعلم
Agree أوافق	Female أنثى	20	Saudi سعودي	Batterjee Medical College, Jeddah. كلية البترجي الطبية، جدة	Dentistry طب الأسنان	1st year السنة الأولى	3.5-4	It is simulating human attitudes and abilities using computers and technology by teaching machines how humans think, behave, and react toward different situations. هو سلوك وخصائص معينة تتسم بها البرامج الحاسوبية، تجعلها تحاكي القدرات الذهنية البشرية وأنماط عملها.	Print Media (books, magazines, newspapers). وسائل الإعلام المطبوعة (كتب، مجلات، صحف)., Broadcast Media (TV, Radio). وسائل الإعلام المرئية (تلفزيون ، راديو), Social Media (Facebook, Instagram, Snapchat, Tweeter,…). وسائل التواصل الاجتماعي, Internet (web pages, online databases,...). الإنترنت (صفحات الويب، قواعد البيانات، ...)	No لا	Yes نعم	Yes نعم	Yes نعم	No لا	Do not know لا أعلم	Yes نعم	Yes نعم	Yes نعم	No لا	Do not know لا أعلم	Do not know لا أعلم	Do not know لا أعلم
Agree أوافق	Male ذكر	34	Saudi سعودي	Umm Al Qura University, Makkah. جامعة أم القرى، مكة	Medicine الطب	Postgraduate (e.g. MSc. or PhD) دراسات عليا (ماجستير أو دكتوراه)	≤3.5	It is simulating human attitudes and abilities using computers and technology by teaching machines how humans think, behave, and react toward different situations. هو سلوك وخصائص معينة تتسم بها البرامج الحاسوبية، تجعلها تحاكي القدرات الذهنية البشرية وأنماط عملها.	Social Media (Facebook, Instagram, Snapchat, Tweeter,…). وسائل التواصل الاجتماعي, Internet (web pages, online databases,...). الإنترنت (صفحات الويب، قواعد البيانات، ...), Family members. أفراد الأسرة	Yes- as a personal effort. نعم كرغبة شخصية	Yes نعم	Yes نعم	Yes نعم	Yes نعم	Yes نعم	Yes نعم	Yes نعم	Yes نعم	Yes نعم	No لا	Do not know لا أعلم	Yes نعم
Agree أوافق	Female أنثى	24	Saudi سعودي	كلية الطب بالقنفذة، تابعة لجامعة ام القرى	Medicine الطب	السنة السادسة (في الطب السنة السادسة سنة مستقلة عن سنة الامتياز/internship وتدرّس بالكلية)	3.5-4	It is simulating human attitudes and abilities using computers and technology by teaching machines how humans think, behave, and react toward different situations. هو سلوك وخصائص معينة تتسم بها البرامج الحاسوبية، تجعلها تحاكي القدرات الذهنية البشرية وأنماط عملها.	Social Media (Facebook, Instagram, Snapchat, Tweeter,…). وسائل التواصل الاجتماعي	No لا	Yes نعم	Yes نعم	Yes نعم	No لا	Yes نعم	No لا	No لا	Yes نعم	No لا	Do not know لا أعلم	Do not know لا أعلم	Do not know لا أعلم
Agree أوافق	Female أنثى	22	Saudi سعودي	جامعة المجمعة	Medicine الطب	3rd year السنة الثالثة	3.5-4	It is simulating human attitudes and abilities using computers and technology by teaching machines how humans think, behave, and react toward different situations. هو سلوك وخصائص معينة تتسم بها البرامج الحاسوبية، تجعلها تحاكي القدرات الذهنية البشرية وأنماط عملها.	Academic courses المناهج الدراسية, Print Media (books, magazines, newspapers). وسائل الإعلام المطبوعة (كتب، مجلات، صحف)., Broadcast Media (TV, Radio). وسائل الإعلام المرئية (تلفزيون ، راديو), Outdoor Media (e.g.Billboards, Transit Ads,..). وسائل الإعلام الخارجية (مثل اللوحات الإعلانية والجدارية،..), Social Media (Facebook, Instagram, Snapchat, Tweeter,…). وسائل التواصل الاجتماعي, Internet (web pa…	No لا	Yes نعم	Yes نعم	Yes نعم	Yes نعم	Yes نعم	Yes نعم	Yes نعم	Yes نعم	Yes نعم	Do not know لا أعلم	Yes نعم	Yes نعم
Agree أوافق	Male ذكر	23	Non-Saudi غير سعودي	Batterjee Medical College, Jeddah. كلية البترجي الطبية، جدة	Preparatory Year السنة التحضيرية	Preparatory Year السنة التحضيرية	3.5-4	It is simulating human attitudes and abilities using computers and technology by teaching machines how humans think, behave, and react toward different situations. هو سلوك وخصائص معينة تتسم بها البرامج الحاسوبية، تجعلها تحاكي القدرات الذهنية البشرية وأنماط عملها.	Academic courses المناهج الدراسية	No لا	No لا	No لا	No لا	No لا	No لا	No لا	No لا	No لا	No لا	No لا	No لا	No لا
Agree أوافق	Female أنثى	19	Saudi سعودي	Batterjee Medical College, Jeddah. كلية البترجي الطبية، جدة	Preparatory Year السنة التحضيرية	Preparatory Year السنة التحضيرية	3.5-4	It is simulating human attitudes and abilities using computers and technology by teaching machines how humans think, behave, and react toward different situations. هو سلوك وخصائص معينة تتسم بها البرامج الحاسوبية، تجعلها تحاكي القدرات الذهنية البشرية وأنماط عملها.	Academic courses المناهج الدراسية	No لا	Do not know لا أعلم	Yes نعم	No لا	Yes نعم	No لا	Yes نعم	No لا	No لا	Yes نعم	No لا	No لا	No لا
Agree أوافق	Male ذكر	20	Non-Saudi غير سعودي	Batterjee Medical College, Jeddah. كلية البترجي الطبية، جدة	Preparatory Year السنة التحضيرية	Preparatory Year السنة التحضيرية	>4.5	It is simulating human attitudes and abilities using computers and technology by teaching machines how humans think, behave, and react toward different situations. هو سلوك وخصائص معينة تتسم بها البرامج الحاسوبية، تجعلها تحاكي القدرات الذهنية البشرية وأنماط عملها.	Broadcast Media (TV, Radio). وسائل الإعلام المرئية (تلفزيون ، راديو)	Yes- as a part of university curriculum. نعم كمنهج دراسي في الجامعة	Yes نعم	Yes نعم	Yes نعم	Yes نعم	Do not know لا أعلم	Yes نعم	Yes نعم	Yes نعم	Yes نعم	Yes نعم	Yes نعم	Yes نعم
Agree أوافق	Male ذكر	23	Saudi سعودي	Batterjee Medical College, Jeddah. كلية البترجي الطبية، جدة	Dentistry طب الأسنان	intern إنترن	>4.5	It is a medical dictionary used by healthcare consumers, students, and professionals. إنه قاموس طبي يستخدمه جمهور الرعاية الصحية والطلاب والمهنيون.	Academic courses المناهج الدراسية	Yes- as a part of university curriculum. نعم كمنهج دراسي في الجامعة	Yes نعم	Do not know لا أعلم	Yes نعم	Yes نعم	Yes نعم	Yes نعم	Yes نعم	Yes نعم	Yes نعم	Yes نعم	No لا	No لا
Agree أوافق	Female أنثى	20	Saudi سعودي	Batterjee Medical College, Jeddah. كلية البترجي الطبية، جدة	Dentistry طب الأسنان	1st year السنة الأولى	≤3.5	It is simulating human attitudes and abilities using computers and technology by teaching machines how humans think, behave, and react toward different situations. هو سلوك وخصائص معينة تتسم بها البرامج الحاسوبية، تجعلها تحاكي القدرات الذهنية البشرية وأنماط عملها.	Academic courses المناهج الدراسية, Print Media (books, magazines, newspapers). وسائل الإعلام المطبوعة (كتب، مجلات، صحف)., Broadcast Media (TV, Radio). وسائل الإعلام المرئية (تلفزيون ، راديو), Social Media (Facebook, Instagram, Snapchat, Tweeter,…). وسائل التواصل الاجتماعي, Internet (web pages, online databases,...). الإنترنت (صفحات الويب، قواعد البيانات، ...)	No لا	Yes نعم	Yes نعم	Yes نعم	Yes نعم	No لا	Yes نعم	Yes نعم	Yes نعم	No لا	No لا	Do not know لا أعلم	No لا
Agree أوافق	Male ذكر	22	Non-Saudi غير سعودي	Batterjee Medical College, Jeddah. كلية البترجي الطبية، جدة	Preparatory Year السنة التحضيرية	Preparatory Year السنة التحضيرية	≤3.5	It is simulating human attitudes and abilities using computers and technology by teaching machines how humans think, behave, and react toward different situations. هو سلوك وخصائص معينة تتسم بها البرامج الحاسوبية، تجعلها تحاكي القدرات الذهنية البشرية وأنماط عملها.	Academic courses المناهج الدراسية, Print Media (books, magazines, newspapers). وسائل الإعلام المطبوعة (كتب، مجلات، صحف)., Broadcast Media (TV, Radio). وسائل الإعلام المرئية (تلفزيون ، راديو), Social Media (Facebook, Instagram, Snapchat, Tweeter,…). وسائل التواصل الاجتماعي	Yes- as a part of university curriculum. نعم كمنهج دراسي في الجامعة	Yes نعم	Yes نعم	Yes نعم	No لا	Yes نعم	Yes نعم	No لا	Yes نعم	Yes نعم	Yes نعم	Yes نعم	Yes نعم
